# Supplementary material for: Context-enriched interactome powered by proteomics helps the identification of novel regulators of macrophage activation
Source: eLife. 2018 Oct 10;7:e37059. doi: 10.7554/eLife.37059 (PMC6179386; doi:10.7554/eLife.37059)
Supplement: Figure 1—source data 1. — Co-abundance network for M(-). [file elife-37059-fig1-data1.csv]

A2M	AHSG
A2M	APEH
A2M	ARHGAP18
A2M	ARHGAP25
A2M	ASL
A2M	CAB39
A2M	HLA-A
A2M	LMNA
A2M	MYO5A
A2M	MYO6
A2M	OCIAD2
A2M	OSBPL9
A2M	P4HB
A2M	PLIN3
A2M	PPM1A
A2M	RAP1A
A2M	SPTBN1
A2M	TIMMDC1
A2M	UBA6
A2M	UTRN
A2M	VPS4A
AAK1	ASH2L
AAK1	CARS
AAK1	KDELC2
AAK1	LPP
AAK1	PFN1
AAK1	PGK2
AAK1	RRBP1
AAK1	TAB1
AAK1	TSNAX
AAK1	UBE2V2
AAK1	UFD1L
AATF	ICAM1
AATF	MMP9
ABCD3	ACTR2
ABCD3	AP3D1
ABCD3	DOCK5
ABCD3	PSMA3
ABCD3	RPL26L1
ABCD3	VAC14
ABCE1	G6PD
ABCE1	HEATR3
ABCE1	LARS
ABCE1	RPL15
ABCE1	SRM
ABCE1	TRIM33
ABCE1	TUBGCP2
ABCF1	COBRA1
ABCF1	DDX24
ABCF1	DTX3L
ABCF1	HUWE1
ABCF1	MLEC
ABCF1	PNPT1
ABCF2	AMPD3
ABCF2	KARS
ABCF2	PDIA5
ABHD10	HNRPLL
ABHD10	MCM3
ABHD10	PPP1CB
ABHD10	RBMXL1
ABHD12	APPL1
ABHD12	KRAS
ABHD12	OXCT1
ABHD12	SDCBP
ABI1	CBS
ABI1	EIF1B
ABI1	FAH
ABI1	GNL3
ABI1	HIST1H1E
ABI1	IL1B
ABI1	MATR3
ABI1	RFTN1
ABI1	RPL32
ABR	ADH5
ABR	EIF2S3
ABR	EIF3M
ABR	H6PD
ABR	KRT1
ABR	MOV10
ABR	MYO1F
ABR	PARP14
ABR	PGD
ABR	PSMD8
ABR	RNPEP
ABR	RPN1
ABR	RPS16
ABR	SKIV2L2
ABR	UPF2
ACAA1	ANKRD17
ACAA1	MAT2B
ACAA1	PFKP
ACAA1	STK4
ACAA1	TTLL12
ACAA2	AK3
ACAA2	EHD4
ACAA2	GBP1
ACAA2	ITSN1
ACAA2	NDUFV1
ACAA2	SEPT9
ACAA2	SNX3
ACAD9	ACADM
ACAD9	ACTR3
ACAD9	AK1
ACAD9	ALDH4A1
ACAD9	ARHGEF7
ACAD9	INPP5D
ACAD9	IST1
ACAD9	LYPLA2
ACAD9	MYO5A
ACAD9	SLC25A24
ACADM	ALDH4A1
ACADM	FCGRT
ACADM	HADHB
ACADM	INF2
ACADM	IST1
ACADM	LEMD2
ACADM	LYPLA2
ACADM	PDLIM5
ACADM	PPP2R5C
ACADM	RSU1
ACADM	SLC25A24
ACADM	SNX3
ACADM	SNX6
ACADM	VCL
ACADS	DARS2
ACADS	DBT
ACADS	DSTN
ACADS	DTYMK
ACADS	EPN1
ACADS	ERP44
ACADS	GSS
ACADS	GSTM1
ACADS	HADHB
ACADS	INPPL1
ACADS	PCK2
ACADS	PMPCB
ACADS	TBC1D15
ACADS	TUFM
ACADS	UBA2
ACADS	VCL
ACADVL	EXOC1
ACADVL	NSF
ACADVL	SEC23IP
ACAP2	CAPZA2
ACAP2	FYB
ACAP2	GLYR1
ACAP2	HNRPLL
ACAP2	MAPK3
ACAP2	MYCBP2
ACAP2	POR
ACAP2	PPP1CB
ACAP2	RP2
ACAP2	SAR1B
ACAP2	SDSL
ACAT1	GLIPR2
ACAT1	GLUD1
ACAT1	VCPIP1
ACAT2	APEX1
ACAT2	BANF1
ACAT2	CSTB
ACAT2	DCTN2
ACAT2	DLD
ACAT2	DPY30
ACAT2	ENSA
ACAT2	EVI2B
ACAT2	FAM136A
ACAT2	HSPA9
ACAT2	ITGB1
ACAT2	MDH2
ACAT2	MTPN
ACAT2	NUCB1
ACAT2	PDCD5
ACAT2	PFDN1
ACAT2	PFDN2
ACAT2	PFDN5
ACAT2	PFDN6
ACAT2	PSME1
ACAT2	RABEP1
ACAT2	RGS10
ACAT2	SEC62
ACAT2	SELRC1
ACAT2	SET
ACAT2	SH3BGRL3
ACAT2	TBCA
ACAT2	TTC1
ACAT2	TXNDC12
ACAT2	WIBG
ACBD3	CAPRIN1
ACBD3	SQSTM1
ACBD3	ZC3H15
ACIN1	HMGB3
ACIN1	SF1
ACIN1	SON
ACLY	AHCY
ACLY	COPS2
ACLY	DAK
ACLY	EPHX1
ACLY	ERGIC3
ACLY	ETF1
ACLY	GBE1
ACLY	LRPPRC
ACLY	NUP133
ACLY	PLAA
ACLY	QARS
ACLY	TCP1
ACO1	CTPS
ACO1	GNB2L1
ACO1	RAN
ACO2	AK1
ACO2	ARHGEF6
ACO2	LYPLA2
ACO2	PC
ACO2	TUBA1C
ACOT2	AP1B1
ACOT2	ARPC3
ACOT2	ASCC3
ACOT2	BRE
ACOT2	CRTAP
ACOT2	NCF4
ACOT2	PLCG2
ACOT2	RPN1
ACOT2	RTCD1
ACOT2	TALDO1
ACOT2	TSTA3
ACOT2	U2SURP
ACOT2	WDR91
ACOT7	ANXA5
ACOT7	ARL8B
ACOT7	CAPN2
ACOT7	PPP6R3
ACOT7	PSMC2
ACOT7	PYGB
ACOT7	UCHL5
ACOT9	ATP1A1
ACOT9	EIF4A2
ACOT9	GLMN
ACOT9	PSMD3
ACOT9	RAB35
ACOT9	XRN2
ACSL1	COL6A1
ACSL1	FBP1
ACSL1	NRP1
ACSL1	PABPC4
ACSL1	PUF60
ACSL1	WDR82
ACSL3	NCKAP1L
ACSL3	PKN1
ACSL3	PLCB3
ACSL3	RPL12
ACSL3	STXBP3
ACSL3	VTA1
ACSL4	ATP1B3
ACSL4	PSMB7
ACSL4	RANBP3
ACSL5	AHCYL1
ACSL5	COG3
ACSL5	CUL1
ACSL5	DDX60L
ACSL5	EIF4G1
ACSL5	LMAN1
ACSL5	MYBBP1A
ACSL5	PSME3
ACSL5	RPL27A
ACSL5	TARS
ACSS2	ARIH2
ACSS2	CCT3
ACSS2	ETF1
ACSS2	FARSA
ACSS2	FLII
ACSS2	GDI2
ACSS2	MYO9B
ACSS2	PGM2
ACSS2	PRKACA
ACSS2	PSMB1
ACSS2	PSMD13
ACSS2	RPS2
ACSS2	SMARCA5
ACSS2	TBC1D9B
ACSS2	VPS35
ACSS2	ZW10
ACTBL2	ACTG1
ACTBL2	AIFM1
ACTBL2	AKR1A1
ACTBL2	BLVRA
ACTBL2	CNN2
ACTBL2	CORO1B
ACTBL2	CRTAP
ACTBL2	CYBB
ACTBL2	ECH1
ACTBL2	HSDL2
ACTBL2	HTATIP2
ACTBL2	IDH1
ACTBL2	MRPL37
ACTBL2	P4HA1
ACTBL2	PAK1
ACTBL2	PPIC
ACTBL2	PRPS2
ACTBL2	QPRT
ACTBL2	UGP2
ACTG1	AIFM1
ACTG1	BLVRA
ACTG1	C14orf159
ACTG1	CNN2
ACTG1	CORO1B
ACTG1	CRTAP
ACTG1	ECH1
ACTG1	HMGCL
ACTG1	IDH1
ACTG1	IMMT
ACTG1	OGT
ACTG1	PRPS2
ACTG1	WDR91
ACTL6A	DKC1
ACTL6A	GOLGA3
ACTL6A	LARP7
ACTL6A	LMNB1
ACTL6A	NOP56
ACTL6A	POLD1
ACTL6A	PRPF19
ACTL6A	RAD21
ACTL6A	RBM39
ACTL6A	RPA1
ACTN1	ARRB2
ACTN1	COX6C
ACTN1	DYNLL2
ACTN1	GLS
ACTN1	MAPKAPK3
ACTN1	PPP2R2A
ACTN1	XRN2
ACTN4	PSMC4
ACTR1A	ARHGAP4
ACTR1A	ATP5C1
ACTR1A	DCXR
ACTR1A	RNPEP
ACTR1A	RPL3
ACTR1A	UPF2
ACTR1B	EXOC7
ACTR2	ALDH9A1
ACTR2	AMPD2
ACTR2	ANO6
ACTR2	AP3D1
ACTR2	ARFGEF2
ACTR2	ATP2A2
ACTR2	ATP5L
ACTR2	CLTC
ACTR2	DAP3
ACTR2	DOPEY2
ACTR2	EIF2S1
ACTR2	EIF3L
ACTR2	ELMO2
ACTR2	GPI
ACTR2	IQGAP1
ACTR2	KPNA3
ACTR2	KPNB1
ACTR2	MAPK1
ACTR2	NQO1
ACTR2	NUP93
ACTR2	PKM2
ACTR2	PRKDC
ACTR2	PSMA3
ACTR2	PSMD1
ACTR2	RAB14
ACTR2	RAB3GAP1
ACTR2	RAB5C
ACTR2	RECQL
ACTR2	RPL26L1
ACTR2	SRGAP2
ACTR2	TNPO1
ACTR2	UNC45A
ACTR2	USP24
ACTR2	VPS13C
ACTR3	HADHB
ACTR3	INF2
ACTR3	INPPL1
ACTR3	IST1
ACTR3	PDCD6
ACTR3	PLCB2
ACTR3	PPP3CA
ACTR3	SNX6
ACTR3	TUFM
ACY1	ATOX1
ACY1	CLTB
ACY1	ENSA
ACY1	LASP1
ACY1	MANF
ACY1	METAP1
ACY1	PSME1
ACY1	SET
ACY1	SH3BGRL3
ACY1	SSBP1
ACY1	STIP1
ADAM10	CIAO1
ADAM10	FKBP3
ADAM17	ANPEP
ADAM17	COPS3
ADAM17	DNAJA2
ADAM17	EEA1
ADAM17	ITGB2
ADAM17	ITGB5
ADAM17	MSRA
ADAM17	NUDT5
ADAM17	PSD3
ADAM17	RAP1B
ADAM17	ROCK2
ADAM17	SPTAN1
ADAM17	TGM2
ADAM17	ZRANB2
ADAM9	ALB
ADAM9	APEH
ADAM9	CSRP1
ADAM9	DAB2
ADAM9	FAM129A
ADAM9	HNRNPD
ADAM9	LMNA
ADAM9	MSR1
ADAM9	P4HB
ADAM9	PICALM
ADAM9	ROCK2
ADAM9	SH3KBP1
ADAM9	UBA6
ADAM9	UTRN
ADAP1	AGL
ADAP1	COASY
ADAP1	CTPS
ADAP1	LTA4H
ADAP1	PRPF6
ADAP1	RAN
ADAP1	SERPINB1
ADAP1	ZC3HAV1
ADH5	ARHGAP4
ADH5	COPS5
ADH5	DDOST
ADH5	EIF2S3
ADH5	EIF3M
ADH5	KRT1
ADH5	MOV10
ADH5	MYO1F
ADH5	PARP14
ADH5	RPN1
ADH5	RPS16
ADH5	SKIV2L2
ADH5	UFL1
ADK	COPG2
ADK	DNM1
ADK	EPHX1
ADK	GSTM3
ADK	PKN1
ADK	PLCB3
ADK	RAP1GDS1
ADK	SEC31A
ADK	SNRNP200
ADK	VAV1
ADK	VTA1
ADNP	AP2B1
ADNP	CC2D1B
ADNP	G3BP1
ADNP	HCFC1
ADNP	HDAC2
ADNP	IFIH1
ADNP	KDM3B
ADNP	MAT2A
ADNP	PCBP1
ADNP	POLR2A
ADNP	RPS13
ADNP	TEX2
ADNP	UBE2V1
ADNP	UBXN4
ADPGK	CHID1
ADPGK	COPG2
ADPGK	DHX9
ADPGK	IMPAD1
ADPGK	NRD1
ADPGK	PUS1
ADPGK	RPL12
ADPGK	SNRNP200
ADPGK	SNRPB2
ADPGK	TYMP
ADPGK	VTA1
ADRBK1	ANXA6
ADRBK1	ATP6V1H
ADRBK1	CTR9
ADRBK1	GABARAP
ADRBK1	GK
ADRBK1	MAPK3
ADRBK1	MAPRE1
ADRBK1	NISCH
ADRBK1	NLN
ADRBK1	NPL
ADRBK1	S100A8
ADRBK1	SAMHD1
ADRBK1	SEPT7
ADRBK1	VDAC3
ADRM1	CASP1
ADRM1	GBAS
ADRM1	HDAC1
ADRM1	HSD17B10
ADRM1	LYPLA1
ADRM1	PCYT1A
ADRM1	SUGP2
ADSL	AUP1
ADSL	CAD
ADSL	FAM213A
ADSL	RUVBL2
ADSL	TECR
ADSL	TRIM33
ADSL	ZC3H7B
ADSS	CBL
ADSS	EFTUD1
ADSS	IRF2BPL
ADSS	ITGA5
ADSS	KRR1
ADSS	KTN1
ADSS	RAD23A
ADSS	RPLP2
ADSS	SCCPDH
ADSS	ZMYND8
AFG3L2	CLINT1
AFG3L2	CLIP2
AFG3L2	ESD
AFG3L2	IVD
AFG3L2	NDUFV1
AFG3L2	PPP2R5C
AFG3L2	SMC2
AFP	AHNAK
AFP	ALB
AFP	ARHGAP25
AFP	CORO7
AFP	CSRP1
AFP	DAB2
AFP	DLST
AFP	FNBP1
AFP	SH3KBP1
AFTPH	ARFGAP3
AFTPH	ASH2L
AFTPH	BAZ1A
AFTPH	BCAS2
AFTPH	DDX5
AFTPH	EXOSC10
AFTPH	G3BP1
AFTPH	GIGYF2
AFTPH	NAA50
AFTPH	NUP214
AFTPH	PABPN1
AFTPH	PRRC1
AFTPH	PRRC2A
AFTPH	RAE1
AFTPH	RBM12
AFTPH	RDBP
AFTPH	RPS13
AFTPH	SART1
AFTPH	TPP2
AFTPH	UBE2O
AGFG1	MCM5
AGK	AK3
AGK	ALDH4A1
AGK	EHD4
AGK	INF2
AGK	MRPS25
AGK	NDUFA10
AGK	PSMA7
AGK	SEPT9
AGK	VCL
AGL	COASY
AGL	DDX18
AGL	EEF1A2
AGL	EIF3K
AGL	EIF4A3
AGL	ERLIN1
AGL	GNB2L1
AGL	POLR1A
AGPS	ATP5I
AGPS	CALM1
AGPS	CASP3
AGPS	CLIC1
AGPS	DIAPH2
AGPS	DPM1
AGPS	FERMT2
AGPS	FMNL2
AGPS	HM13
AGPS	LYN
AGPS	METTL7A
AGPS	NPC1
AGPS	PLXNB2
AGPS	PPP6R3
AGPS	PRMT5
AGPS	PTK2B
AGPS	RAB1B
AGPS	RAC2
AGPS	STOM
AGPS	TMX3
AGPS	VAV3
AHCTF1	CCDC88A
AHCTF1	CSF1R
AHCTF1	CTSD
AHCTF1	DNAJC8
AHCTF1	GLUL
AHCTF1	HSPA1A
AHCTF1	HSPA2
AHCTF1	PSMD10
AHCTF1	PSPC1
AHCTF1	ZEB2
AHCTF1	ZFR
AHCY	NUP133
AHCYL1	MYBBP1A
AHCYL1	RPL27A
AHCYL1	RPL4
AHCYL1	RPS8
AHCYL1	VARS
AHNAK	ALB
AHNAK	ARHGAP25
AHNAK	FNBP1
AHNAK	SH3KBP1
AHSA1	AMPD3
AHSA1	POGLUT1
AHSA1	SRC
AHSA1	UQCRFS1
AHSG	APEH
AHSG	ARHGAP25
AHSG	ATP1B1
AHSG	CTSC
AHSG	FGD3
AHSG	GSTO1
AHSG	HLA-A
AHSG	LMNA
AHSG	MSR1
AHSG	MYO5A
AHSG	NR3C1
AHSG	P4HB
AHSG	PDLIM7
AHSG	PLIN3
AHSG	SPTBN1
AHSG	TNS1
AHSG	TUBA4A
AHSG	TUBB6
AHSG	UBA6
AHSG	UTRN
AIF1	FAM114A2
AIF1	NOLC1
AIFM1	BLVRB
AIFM1	CNN2
AIFM1	CPT2
AIFM1	FAM82B
AIFM1	GBAS
AIFM1	HSDL2
AIFM1	MRPL37
AIFM1	PAK1
AIFM1	PARS2
AIFM1	PPIC
AIFM1	SAE1
AIFM1	SNX5
AIFM1	WDR91
AIM1	ANXA4
AIM1	C14orf159
AIM1	COPE
AIMP1	DIDO1
AIMP1	HNRNPF
AIMP1	HNRNPK
AIMP1	NCOA7
AIMP1	NEDD8-MDP1
AIMP1	TAF15
AIMP1	U2AF2
AIMP2	ALDOC
AIMP2	AP1M1
AIMP2	AP2A2
AIMP2	CAPN1
AIMP2	CASP8
AIMP2	CDK9
AIMP2	CNP
AIMP2	CSNK2A2
AIMP2	CTNND1
AIMP2	DPP3
AIMP2	DSTN
AIMP2	EIF2AK2
AIMP2	GMPPB
AIMP2	GNB4
AIMP2	GSR
AIMP2	GSTM1
AIMP2	HNMT
AIMP2	RG9MTD1
AIMP2	SSRP1
AIMP2	STAM2
AIMP2	SUCLA2
AIMP2	TBC1D15
AIMP2	UBA2
AIP	GLG1
AIP	PPP1R10
AIP	SF1
AIP	SF3A2
AIP	SNW1
AK1	ALDH4A1
AK1	ARHGAP25
AK1	ARHGEF7
AK1	INF2
AK1	ITSN1
AK1	PSMC6
AK1	RAB2A
AK1	RAP1A
AK2	DBNL
AK2	PMPCA
AK2	ZNF638
AK3	EHD4
AK3	GBP1
AK3	ITSN1
AK3	LRRC47
AK3	MTHFD1
AK3	NDUFV1
AK3	PLEKHA2
AK3	PLS3
AK3	SCP2
AK3	SEPT9
AK3	SNX3
AK4	ASNS
AK4	COL4A3BP
AK4	DDX3Y
AK4	EIF3E
AK4	FAR1
AK4	GART
AK4	GEMIN5
AK4	KPNA1
AK4	MST4
AK4	NMT1
AK4	NOSIP
AK4	PABPN1
AK4	PDCD6IP
AK4	RBM26
AK4	RPL10A
AK4	RPL8
AK4	TDP1
AK4	TNRC6B
AK4	UBE2O
AK4	UBE2V2
AK4	VAPA
AK4	WARS
AK4	YTHDF2
AKAP13	ATAD3A
AKAP13	B2M
AKAP13	DAP
AKAP13	STK24
AKAP9	EIF4E
AKAP9	GLRX3
AKAP9	GRPEL1
AKAP9	HOOK3
AKAP9	ITGAM
AKAP9	ITGB5
AKAP9	KIF5B
AKAP9	NAPG
AKAP9	PHB
AKAP9	PSD3
AKAP9	PXN
AKAP9	RAB11B
AKAP9	ROCK2
AKAP9	RPS5
AKAP9	S100A6
AKAP9	TGM2
AKR1A1	CNN2
AKR1A1	CRTAP
AKR1A1	ECH1
AKR1A1	HSDL2
AKR1A1	MDH1
AKR1A1	PAK1
AKR1A1	PRPS2
AKR1A1	UGP2
AKR1B1	GRB2
AKR1B1	MAPRE1
AKR1B1	MCCC1
AKR1B1	MPP1
AKR1B1	NUP37
AKR1B1	PPP1CB
AKR1B1	PRPF4B
AKR1B1	SAMHD1
AKR1B1	SDSL
AKR7A2	ECHS1
AKR7A2	SPATS2L
AKR7A2	VDAC2
ALB	APEH
ALB	CSRP1
ALB	DAB2
ALB	FNBP1
ALB	HLA-A
ALB	NR3C1
ALB	P4HB
ALB	SH3KBP1
ALB	UTRN
ALCAM	CEP170
ALCAM	CYCS
ALCAM	EIF4G3
ALCAM	KTN1
ALCAM	MYLK
ALCAM	OXSR1
ALCAM	RPLP2
ALCAM	SACM1L
ALCAM	SPAG9
ALCAM	STAU1
ALDH1B1	CLPB
ALDH1B1	CRIP1
ALDH1B1	CSF1R
ALDH1B1	DDX42
ALDH1B1	HNRNPM
ALDH1B1	MCM3
ALDH1B1	PPP1R9B
ALDH1B1	QKI
ALDH1B1	SEPT8
ALDH1B1	ZNF207
ALDH1L2	FABP4
ALDH1L2	HSPA2
ALDH1L2	NUP88
ALDH1L2	SUMO3
ALDH2	CAPZA2
ALDH2	COASY
ALDH2	EEF1A2
ALDH2	ELMO1
ALDH2	HDLBP
ALDH2	NCF2
ALDH2	PPME1
ALDH2	SERPINB1
ALDH2	STAT1
ALDH2	TCERG1
ALDH2	TOMM40
ALDH2	USP4
ALDH2	WDR5
ALDH4A1	ARHGEF7
ALDH4A1	CBR1
ALDH4A1	EHD4
ALDH4A1	FGD3
ALDH4A1	FLOT2
ALDH4A1	INF2
ALDH4A1	INPP5D
ALDH4A1	LYPLA2
ALDH4A1	NF2
ALDH4A1	PPP3CA
ALDH4A1	PURA
ALDH4A1	SEPT9
ALDH4A1	SLC25A24
ALDH4A1	STIM1
ALDH4A1	VCL
ALDH7A1	NDUFB10
ALDH7A1	NECAP2
ALDH7A1	SERPINH1
ALDH7A1	SUMO3
ALDH7A1	VDAC1
ALDH7A1	VRK1
ALDH9A1	AMPD2
ALDH9A1	ANO6
ALDH9A1	AP1G1
ALDH9A1	AP1M1
ALDH9A1	ARHGAP1
ALDH9A1	ARMC8
ALDH9A1	ARPC4
ALDH9A1	ATM
ALDH9A1	ATP5L
ALDH9A1	CASP8
ALDH9A1	CCDC93
ALDH9A1	CLTC
ALDH9A1	DAP3
ALDH9A1	ERI3
ALDH9A1	GNG5
ALDH9A1	GNPDA1
ALDH9A1	HK1
ALDH9A1	HTT
ALDH9A1	KPNA3
ALDH9A1	LONP1
ALDH9A1	NCAPD2
ALDH9A1	NQO1
ALDH9A1	NUP93
ALDH9A1	PFKL
ALDH9A1	PSMD1
ALDH9A1	PSMD14
ALDH9A1	RAB5C
ALDH9A1	RECQL
ALDH9A1	RHEB
ALDH9A1	SLC25A5
ALDH9A1	TNPO1
ALDH9A1	UAP1L1
ALDH9A1	VPS13C
ALDH9A1	VPS35
ALDOA	DNAJA3
ALDOA	DPYSL2
ALDOA	PGK2
ALDOA	PRPF3
ALDOA	PSMC3
ALDOA	RAP2B
ALDOA	RBM4
ALDOA	RPRD1B
ALDOA	SLC4A1AP
ALDOA	TCEB1
ALDOA	TNRC6B
ALDOA	UFD1L
ALDOC	ATP5O
ALDOC	CDK9
ALDOC	DDX23
ALDOC	DSTN
ALDOC	DTYMK
ALDOC	ERP44
ALDOC	GMPPB
ALDOC	GSTM1
ALDOC	HNRNPH2
ALDOC	HSPB1
ALDOC	ILK
ALDOC	LIPA
ALDOC	NUP210
ALDOC	PMPCB
ALDOC	RNH1
ALDOC	SSRP1
ALDOC	STAM2
ALDOC	TBC1D15
ALDOC	TRMT5
ALDOC	UBA2
AMPD2	ANO6
AMPD2	AP1M1
AMPD2	AP2A1
AMPD2	ARHGAP1
AMPD2	ARMC8
AMPD2	ATM
AMPD2	ATP2A2
AMPD2	ATP5L
AMPD2	CAND1
AMPD2	DAP3
AMPD2	EIF2B1
AMPD2	EIF2C2
AMPD2	GNG5
AMPD2	GPI
AMPD2	IQGAP1
AMPD2	KPNA3
AMPD2	MYO9B
AMPD2	NQO1
AMPD2	NUP155
AMPD2	NUP93
AMPD2	PANK4
AMPD2	PKM2
AMPD2	PRKDC
AMPD2	PSMD1
AMPD2	PSMD6
AMPD2	RAB5C
AMPD2	RHEB
AMPD2	RPS2
AMPD2	SRGAP2
AMPD2	SUMF2
AMPD2	UNC45A
AMPD2	USP24
AMPD2	VPS13C
AMPD3	DYNLT1
AMPD3	KARS
AMPD3	RPS4X
AMPD3	ZC3HAV1
ANKHD1	AP2B1
ANKHD1	ARFGAP3
ANKHD1	ARHGAP17
ANKHD1	BAZ1A
ANKHD1	GTF2F1
ANKHD1	KDM3B
ANKHD1	LIMA1
ANKHD1	MAGOH
ANKHD1	PPFIA1
ANKHD1	PTBP1
ANKHD1	RAE1
ANKHD1	RRBP1
ANKHD1	SCYL2
ANKHD1	SRP14
ANKHD1	TEX2
ANKHD1	TPP2
ANKHD1	UBE2V1
ANKHD1	YWHAH
ANKRD17	MCTS1
ANKRD17	PFKP
ANKRD17	STK4
ANKRD44	BMP2K
ANKRD44	CORO7
ANO6	AP1M1
ANO6	AP2A1
ANO6	ARHGAP1
ANO6	ARMC8
ANO6	ATP2A2
ANO6	ATP5L
ANO6	CAND1
ANO6	EIF2B1
ANO6	EIF2C2
ANO6	GPI
ANO6	IQGAP1
ANO6	KPNA3
ANO6	KPNB1
ANO6	MAPK1
ANO6	NQO1
ANO6	NUP155
ANO6	NUP93
ANO6	PFKL
ANO6	PKM2
ANO6	PRKDC
ANO6	PSMA3
ANO6	QARS
ANO6	RAB14
ANO6	RAB3GAP1
ANO6	RAB5C
ANO6	RPS3
ANO6	SRGAP2
ANO6	UNC45A
ANO6	USP24
ANO6	VPS13C
ANO6	XPO7
ANO6	ZMPSTE24
ANP32A	ATP5H
ANP32A	CBX3
ANP32A	CCDC25
ANP32A	CLIP1
ANP32A	HNRNPUL1
ANP32A	LACTB2
ANP32A	MIA3
ANP32A	MYL6
ANP32A	NASP
ANP32A	NUCB2
ANP32A	PSAT1
ANP32A	SERPINC1
ANP32A	TPD52
ANP32A	TPM3
ANP32A	UBXN7
ANP32B	CBL
ANP32B	CD44
ANP32B	DENR
ANP32B	EFTUD1
ANP32B	EIF5B
ANP32B	IRF2BPL
ANP32B	ITGB1
ANP32B	KRR1
ANP32B	KTN1
ANP32B	RAD23A
ANP32B	RPLP2
ANP32B	S100A11
ANP32B	SCCPDH
ANP32E	CNPY3
ANP32E	LACTB2
ANP32E	LSM6
ANP32E	MIA3
ANP32E	PSAT1
ANP32E	RPL23A
ANP32E	RPLP1
ANP32E	RPS21
ANP32E	UBXN7
ANPEP	DNAJA2
ANPEP	EIF4E
ANPEP	GRPEL1
ANPEP	KIF5B
ANPEP	LAMP2
ANPEP	MAP3K7
ANPEP	MMP14
ANPEP	PSD3
ANPEP	RAP1B
ANPEP	RPS5
ANXA1	CPNE3
ANXA1	ECHDC1
ANXA1	KRAS
ANXA1	OGDH
ANXA1	OXCT1
ANXA11	API5
ANXA11	GNAI3
ANXA11	LPP
ANXA11	OTUB1
ANXA11	PLRG1
ANXA11	SEP15
ANXA11	SEPT6
ANXA11	UQCRC1
ANXA11	WDR1
ANXA11	YWHAH
ANXA2	ATP5L
ANXA2	BICD2
ANXA2	BIRC6
ANXA2	CSE1L
ANXA2	DDX46
ANXA2	DDX6
ANXA2	EIF2C2
ANXA2	GTPBP4
ANXA2	HMBS
ANXA2	HMGA1
ANXA2	NUP155
ANXA2	PANK4
ANXA2	PIK3C3
ANXA2	PSMD2
ANXA2	TFRC
ANXA2	TMX3
ANXA2	UNC45A
ANXA4	ITGA4
ANXA4	PARS2
ANXA5	CAPN2
ANXA5	COX4NB
ANXA5	MAPKAPK3
ANXA5	PSMD3
ANXA5	UCHL5
ANXA6	CTR9
ANXA6	DCXR
ANXA6	NISCH
ANXA6	NLN
ANXA6	STK38
AP1B1	ARF1
AP1B1	ARPC2
AP1B1	ASCC3
AP1B1	ATP13A1
AP1B1	CCBL2
AP1B1	EIF2S3
AP1B1	OPA1
AP1B1	PLCG2
AP1B1	PSMD13
AP1B1	RPL13A
AP1B1	RPN1
AP1B1	RPS16
AP1B1	SLC25A1
AP1B1	SYK
AP1B1	UFL1
AP1G1	BIRC6
AP1G1	BZW1
AP1G1	BZW2
AP1G1	CASP3
AP1G1	COG2
AP1G1	DDX6
AP1G1	DENND3
AP1G1	DHX36
AP1G1	DPM1
AP1G1	EIF2S2
AP1G1	GNAI2
AP1G1	GNG5
AP1G1	HM13
AP1G1	HMGA1
AP1G1	HTT
AP1G1	MAPK1
AP1G1	PPP6C
AP1G1	PRMT5
AP1G1	PSMD2
AP1G1	PUM1
AP1G1	PUM2
AP1G1	RAB1B
AP1G1	RAB8A
AP1G1	RPS3
AP1G1	STOM
AP1G1	TMX3
AP1G1	TNPO1
AP1G1	UBA1
AP1G1	UBR4
AP1G1	VPS28
AP1M1	AP2A1
AP1M1	ARPC4
AP1M1	BROX
AP1M1	CAPZB
AP1M1	CKAP5
AP1M1	DAP3
AP1M1	EIF2C2
AP1M1	ERI3
AP1M1	FAM175B
AP1M1	FIS1
AP1M1	GNA12
AP1M1	GPI
AP1M1	HARS2
AP1M1	HK1
AP1M1	HTT
AP1M1	IQGAP1
AP1M1	ME2
AP1M1	PSMD12
AP1M1	PSMD14
AP1M1	RABGAP1
AP1M1	RECQL
AP1M1	RHEB
AP1M1	RPS15A
AP1M1	SAMD9
AP1M1	SLC25A3
AP1M1	SLC25A6
AP1M1	SUMF2
AP1M1	XPNPEP1
AP2A1	ATM
AP2A1	ATP2A2
AP2A1	CAPZB
AP2A1	CLTC
AP2A1	CSE1L
AP2A1	DAP3
AP2A1	DNM2
AP2A1	DOPEY2
AP2A1	EIF2C2
AP2A1	GNA12
AP2A1	GNG5
AP2A1	GPI
AP2A1	IQGAP1
AP2A1	KPNA3
AP2A1	LONP1
AP2A1	MYO9B
AP2A1	NQO1
AP2A1	NUP155
AP2A1	NUP93
AP2A1	PANK4
AP2A1	PRKDC
AP2A1	PSMD1
AP2A1	PSMD12
AP2A1	PSMD6
AP2A1	RECQL
AP2A1	RHEB
AP2A1	RPLP0
AP2A1	RPS15A
AP2A1	RPS2
AP2A1	SAMD9
AP2A1	SAR1A
AP2A1	UNC45A
AP2A2	CAPN1
AP2A2	CCDC93
AP2A2	CSNK2A2
AP2A2	DARS2
AP2A2	FIS1
AP2A2	SNX1
AP2A2	SNX2
AP2A2	SRGAP2
AP2A2	STXBP2
AP2A2	UBE3A
AP2B1	API5
AP2B1	FAM98B
AP2B1	HBS1L
AP2B1	HCFC1
AP2B1	NUP98
AP2B1	PCBP1
AP2B1	PDIA6
AP2B1	PLRG1
AP2B1	PTBP1
AP2B1	SEPT6
AP2B1	SRP14
AP2B1	SUPT5H
AP2B1	UQCRC2
AP2B1	USP8
AP2B1	YTHDF1
AP2B1	YWHAH
AP2B1	ZNF207
AP2M1	AP3D1
AP2M1	C6orf211
AP2M1	CYTH4
AP2M1	EIF2S1
AP2M1	ELMO2
AP2M1	IQGAP1
AP2M1	PSMA3
AP2M1	RAB14
AP2M1	RPL26L1
AP2M1	RPS7
AP2M1	USP9X
AP2M1	VPS13C
AP3B1	COPG
AP3B1	H6PD
AP3B1	NPEPPS
AP3B1	RNPEP
AP3B1	SBDS
AP3B1	SYK
AP3B1	TROVE2
AP3D1	ARHGEF1
AP3D1	ATL3
AP3D1	CLTC
AP3D1	CYTH4
AP3D1	DENND3
AP3D1	DOPEY2
AP3D1	EIF2B1
AP3D1	EIF2S2
AP3D1	FAM175B
AP3D1	GANAB
AP3D1	HTT
AP3D1	KCNAB2
AP3D1	MGEA5
AP3D1	PSMA3
AP3D1	PSMD1
AP3D1	PSMD6
AP3D1	RAB14
AP3D1	RAB3GAP1
AP3D1	RAB5C
AP3D1	TNPO1
AP3D1	VPS13C
AP3M1	BTK
AP3M1	COASY
AP3M1	ELMO1
AP3M1	ITPR1
AP3M1	OAT
AP3M1	PYGL
AP3M1	SERPINB1
AP3M1	SND1
AP3M1	STAT1
AP3M1	XRCC6
APBB1IP	APOOL
APBB1IP	ARHGAP30
APBB1IP	CNDP2
APBB1IP	DLAT
APBB1IP	NDUFS1
APBB1IP	PGK1
APBB1IP	TES
APBB1IP	TMPO
APBB1IP	ZC3H18
APEH	CAB39
APEH	CMPK1
APEH	EIF5
APEH	FLOT2
APEH	HLA-A
APEH	LIMS1
APEH	LRP1
APEH	LRPAP1
APEH	MYO6
APEH	NDUFAF4
APEH	NR3C1
APEH	OCIAD2
APEH	P4HB
APEH	PDHX
APEH	PROSC
APEH	PSMC1
APEH	SPTBN1
APEH	STOML2
APEH	STX7
APEH	TNS1
APEH	TUBB6
APEH	VPS4A
APEX1	APIP
APEX1	BANF1
APEX1	CUTA
APEX1	DCTN2
APEX1	DPY30
APEX1	EEF1B2
APEX1	EVI2B
APEX1	HSPA9
APEX1	NUCB1
APEX1	PDCD5
APEX1	PFDN1
APEX1	PFDN5
APEX1	PREP
APEX1	PRKCSH
APEX1	RPS25
APEX1	SEC62
APEX1	SELRC1
APEX1	TAGLN2
APEX1	TBCA
APEX1	TPI1
APEX1	TXNDC12
APEX1	WIBG
API5	ATP6V1B2
API5	CHAMP1
API5	FAM98B
API5	NUP98
API5	PDXDC1
API5	SEPT2
API5	SEPT6
API5	SRP14
API5	UQCRC2
API5	YWHAH
API5	ZNF207
APIP	CSTB
APIP	DBI
APIP	DCTN2
APIP	DLD
APIP	DPY30
APIP	DYNC1I2
APIP	EVI2B
APIP	MTPN
APIP	PDCD5
APIP	PFDN1
APIP	PFDN2
APIP	PFDN5
APIP	PREP
APIP	PRKCSH
APIP	PSME1
APIP	SELRC1
APIP	TTC1
APIP	TXNDC12
APLP2	RPS6
APLP2	SAFB2
APLP2	TPR
APLP2	ZNF830
APMAP	ARHGAP1
APMAP	ATP1B1
APMAP	CASP8
APMAP	CPNE2
APMAP	DOPEY2
APMAP	EIF2S1
APMAP	ERI3
APMAP	GNPDA1
APMAP	PDCD6
APMAP	PYCARD
APMAP	SRGAP2
APMAP	UBA1
APOA1BP	BLVRB
APOA1BP	CPT2
APOA1BP	CTSA
APOA1BP	EPN1
APOA1BP	GBAS
APOA1BP	NOP58
APOA1BP	SAE1
APOA1BP	SNX5
APOC2	ARID1B
APOC2	H2AFY
APOC2	NOL10
APOC2	SNRNP70
APOC2	ZNF318
APOOL	ARHGAP30
APOOL	CORO7
APOOL	CSRP1
APOOL	DLST
APOOL	PGK1
APOOL	S100A4
APOOL	SDHB
APOOL	TMPO
APOOL	ZC3H18
APPL1	DHRS4
APPL1	RBMXL1
APRT	BAT3
APRT	CAMSAP1
APRT	CDV3
APRT	CTNNA1
APRT	DCTD
APRT	DPYSL2
APRT	DYNLRB1
APRT	EIF3I
APRT	ENO1
APRT	IMPA1
APRT	MRRF
APRT	PIH1D1
APRT	RHOA
APRT	RPRD1B
APRT	SLC4A7
APRT	STAT3
APRT	TCEB1
APRT	TNRC6B
APRT	TPD52L2
APRT	UCHL3
ARAP1	CAP1
ARAP1	ERLEC1
ARAP1	FNDC3B
ARAP1	GSPT1
ARAP1	ITSN2
ARAP1	NMT1
ARAP1	NUMB
ARAP1	PCMT1
ARAP1	PIP4K2A
ARAP1	RAB8B
ARAP1	SH3BP1
ARAP1	SLC4A7
ARAP1	STAT3
ARAP1	TDP1
ARAP1	TLR2
ARAP1	UBA3
ARCN1	KIAA1468
ARCN1	LGALS8
ARCN1	PI4KA
ARCN1	PTPN23
ARF1	ARPC2
ARF1	ASCC3
ARF1	CCBL2
ARF1	DDB1
ARF1	DDX3X
ARF1	DOCK2
ARF1	DPP3
ARF1	GDI2
ARF1	GSTM3
ARF1	OPA1
ARF1	PSMD13
ARF1	SLC25A1
ARF1	STK25
ARF1	TSTA3
ARF1	UFL1
ARF1	VAV1
ARFGAP1	ASAP1
ARFGAP1	CHMP4B
ARFGAP1	CRKL
ARFGAP1	NSFL1C
ARFGAP1	NUDC
ARFGAP1	STK10
ARFGAP1	SYAP1
ARFGAP1	YBX1
ARFGAP3	ASH2L
ARFGAP3	BAZ1A
ARFGAP3	BCAS2
ARFGAP3	DDX5
ARFGAP3	FAM50A
ARFGAP3	G3BP1
ARFGAP3	KDELC2
ARFGAP3	KDM3B
ARFGAP3	KIF13B
ARFGAP3	KPNA1
ARFGAP3	MAGOH
ARFGAP3	MST4
ARFGAP3	PPFIA1
ARFGAP3	PRRC1
ARFGAP3	RPS13
ARFGAP3	SCYL2
ARFGAP3	SEC16A
ARFGAP3	TDP1
ARFGAP3	TPP2
ARFGAP3	TWF2
ARFGAP3	UBE2O
ARFGAP3	WBP11
ARFGAP3	YTHDF1
ARFGEF1	FERMT3
ARFGEF1	NAA35
ARFGEF1	PSMD11
ARFGEF1	RPS6KA3
ARFGEF1	TTC37
ARFGEF2	CAND1
ARFGEF2	DOCK5
ARFGEF2	DOCK8
ARFGEF2	ECM29
ARFGEF2	GCN1L1
ARFGEF2	HMBS
ARFGEF2	NAA25
ARFGEF2	PSMB1
ARFGEF2	PTPN1
ARFGEF2	RPLP0
ARFGEF2	SEL1L
ARFGEF2	SRPR
ARFGEF2	TRAPPC8
ARFGEF2	TRIP12
ARFGEF2	XPO7
ARFIP1	BCAT1
ARFIP1	PRDX4
ARGLU1	MCM4
ARHGAP1	ARHGEF1
ARHGAP1	BZW1
ARHGAP1	C6orf211
ARHGAP1	CLTC
ARHGAP1	DOPEY2
ARHGAP1	EIF2S1
ARHGAP1	EIF3L
ARHGAP1	FAM175B
ARHGAP1	GNG5
ARHGAP1	HK1
ARHGAP1	HTT
ARHGAP1	IQGAP1
ARHGAP1	MAPK1
ARHGAP1	PFKL
ARHGAP1	PSMD6
ARHGAP1	RAB14
ARHGAP1	RAB3GAP1
ARHGAP1	RAB5C
ARHGAP1	RECQL
ARHGAP1	RHEB
ARHGAP1	SLC25A6
ARHGAP1	SRGAP2
ARHGAP1	SUMF2
ARHGAP1	UBA1
ARHGAP1	USP24
ARHGAP1	VPS13C
ARHGAP17	ASH2L
ARHGAP17	BCAS2
ARHGAP17	CASP4
ARHGAP17	CHAMP1
ARHGAP17	GTF2F1
ARHGAP17	HCFC1
ARHGAP17	HDAC2
ARHGAP17	KDM3B
ARHGAP17	MAGOH
ARHGAP17	MAST2
ARHGAP17	PCBP1
ARHGAP17	PI4K2A
ARHGAP17	PLRG1
ARHGAP17	POLR2A
ARHGAP17	PPFIA1
ARHGAP17	PRRC1
ARHGAP17	RAE1
ARHGAP17	RPS13
ARHGAP17	RRBP1
ARHGAP17	TSNAX
ARHGAP17	UBE2V1
ARHGAP17	UQCRC2
ARHGAP17	YTHDF1
ARHGAP17	YWHAH
ARHGAP18	FAM129A
ARHGAP18	INPP5D
ARHGAP18	LMNA
ARHGAP18	OSBPL9
ARHGAP18	PLEC
ARHGAP18	RAB2A
ARHGAP18	RAP1A
ARHGAP18	SPTBN1
ARHGAP18	UBA6
ARHGAP25	CD2AP
ARHGAP25	CORO1A
ARHGAP25	CTSC
ARHGAP25	DAB2
ARHGAP25	FGD3
ARHGAP25	FLOT2
ARHGAP25	ITSN1
ARHGAP25	LIMS1
ARHGAP25	P4HB
ARHGAP25	PROSC
ARHGAP25	TNS1
ARHGAP25	UTRN
ARHGAP30	CNDP2
ARHGAP30	DAB2
ARHGAP30	FNBP1
ARHGAP30	SDHB
ARHGAP30	TES
ARHGAP30	TMPO
ARHGAP4	EIF2S3
ARHGAP4	LARS2
ARHGAP4	MOV10
ARHGAP4	MYO1F
ARHGAP4	PARP14
ARHGAP4	PGM3
ARHGAP4	PSMD8
ARHGAP4	RNPEP
ARHGAP4	SPCS2
ARHGAP4	SULT1A1
ARHGAP4	UPF2
ARHGDIA	CCT2
ARHGDIA	FYN
ARHGDIA	GMFB
ARHGDIA	GOLGA5
ARHGDIA	RANBP6
ARHGDIA	SLFN5
ARHGDIA	SRRM1
ARHGDIA	STK38L
ARHGDIB	CUX1
ARHGDIB	EFHD2
ARHGDIB	HNRNPK
ARHGDIB	HSPA5
ARHGDIB	LSM2
ARHGDIB	MYH10
ARHGDIB	PCBP2
ARHGDIB	RBM5
ARHGDIB	RDBP
ARHGDIB	RPL29
ARHGDIB	RPS17
ARHGDIB	TRIP11
ARHGDIB	TXNL1
ARHGDIB	UBFD1
ARHGDIB	USP15
ARHGEF1	ATP1B1
ARHGEF1	CAMK1
ARHGEF1	CSK
ARHGEF1	DOCK5
ARHGEF1	EIF2B3
ARHGEF1	EIF2S2
ARHGEF1	ERO1L
ARHGEF1	GANAB
ARHGEF1	HSD17B11
ARHGEF1	HTT
ARHGEF1	KCNAB2
ARHGEF1	METTL7A
ARHGEF1	MTCH2
ARHGEF1	MYO6
ARHGEF1	RAB14
ARHGEF1	RALB
ARHGEF1	RPS3
ARHGEF1	SLC25A5
ARHGEF1	STOM
ARHGEF1	UBA1
ARHGEF2	COPA
ARHGEF2	RPL9
ARHGEF2	TRIM33
ARHGEF6	PC
ARHGEF6	SLC25A24
ARHGEF7	CAMK1
ARHGEF7	CBR1
ARHGEF7	CPNE2
ARHGEF7	ENOPH1
ARHGEF7	INF2
ARHGEF7	INPP5D
ARHGEF7	LYPLA2
ARHGEF7	MYO5A
ARHGEF7	NF2
ARHGEF7	PDLIM5
ARHGEF7	PURA
ARHGEF7	PURB
ARHGEF7	SLC25A24
ARHGEF7	STIM1
ARID1B	PABPC4
ARID1B	SUGP1
ARIH1	COPA
ARIH1	ESYT2
ARIH1	HERC4
ARIH1	HK2
ARIH1	NAA16
ARIH1	PTPRE
ARIH1	VPRBP
ARIH2	COPG
ARIH2	DOCK2
ARIH2	GDI2
ARIH2	PRKACA
ARIH2	PSMD13
ARIH2	RPL13A
ARIH2	RPS11
ARIH2	SBDS
ARIH2	STK25
ARIH2	TROVE2
ARL3	CD2AP
ARL3	CFL1
ARL3	DNAJB1
ARL3	LRRC47
ARL3	PRDX5
ARL3	TIMM44
ARL8B	CCT5
ARL8B	GLMN
ARL8B	HS2ST1
ARL8B	ITGAX
ARL8B	MYO1E
ARL8B	PSMD3
ARL8B	SQLE
ARL8B	SRPRB
ARL8B	UCHL5
ARL8B	ZNF622
ARMC8	ATG7
ARMC8	ATP2A2
ARMC8	ATP5L
ARMC8	CCT3
ARMC8	CSE1L
ARMC8	DAP3
ARMC8	DNAJC13
ARMC8	EIF2C2
ARMC8	FARSA
ARMC8	GBE1
ARMC8	GPI
ARMC8	GSTP1
ARMC8	IQGAP1
ARMC8	KPNA3
ARMC8	KPNB1
ARMC8	MYO9B
ARMC8	NCAPD2
ARMC8	NQO1
ARMC8	NUP155
ARMC8	NUP93
ARMC8	PANK4
ARMC8	PIK3CB
ARMC8	PRKDC
ARMC8	PSMD6
ARMC8	RHEB
ARMC8	RPLP0
ARMC8	RPS15A
ARMC8	RPS2
ARMC8	SMARCA5
ARMC8	UNC45A
ARMC8	VPS13C
ARPC1A	ATP6V1E1
ARPC1A	BECN1
ARPC1A	CDK6
ARPC1A	DDX23
ARPC1A	HARS2
ARPC1A	HNRNPH2
ARPC1A	HNRNPUL2
ARPC1A	NUP210
ARPC1A	POTEF
ARPC1A	SNRPA
ARPC1A	SRSF6
ARPC1A	TOM1
ARPC1A	TOMM70A
ARPC1A	TRMT5
ARPC1A	TSFM
ARPC1B	GRHPR
ARPC1B	HDGFRP2
ARPC1B	NEDD8-MDP1
ARPC1B	NIT2
ARPC1B	RAP2B
ARPC1B	SLC4A1AP
ARPC2	ASCC3
ARPC2	ATP13A1
ARPC2	NNT
ARPC2	OPA1
ARPC2	PLCG2
ARPC2	PSMD13
ARPC2	PSMD8
ARPC2	STK25
ARPC2	SYK
ARPC2	TSTA3
ARPC2	UFL1
ARPC3	CDK5
ARPC3	CNP
ARPC3	CSNK2A2
ARPC3	FAM82B
ARPC3	OPA1
ARPC3	PARS2
ARPC3	SAE1
ARPC4	ATM
ARPC4	ATP2A2
ARPC4	ATP5L
ARPC4	BZW1
ARPC4	CAPZB
ARPC4	CDK9
ARPC4	CLTC
ARPC4	CSE1L
ARPC4	DAP3
ARPC4	DDX6
ARPC4	DOPEY2
ARPC4	EIF2S2
ARPC4	EML2
ARPC4	ERI3
ARPC4	FAM175B
ARPC4	FARSB
ARPC4	GANAB
ARPC4	GNAI2
ARPC4	GNG5
ARPC4	GSTP1
ARPC4	HK1
ARPC4	HSPA14
ARPC4	HTT
ARPC4	IRAK4
ARPC4	KPNA3
ARPC4	MGEA5
ARPC4	NQO1
ARPC4	PANK4
ARPC4	PSMD1
ARPC4	PSMD12
ARPC4	PSMD14
ARPC4	PSMD2
ARPC4	RAB14
ARPC4	RAB5C
ARPC4	RABGAP1
ARPC4	RECQL
ARPC4	RHEB
ARPC4	SAR1A
ARPC4	SEPHS1
ARPC4	SLC25A3
ARPC4	SLC25A5
ARPC4	SLC25A6
ARPC4	SUMF2
ARPC4	TLN2
ARPC4	UBA1
ARPC4	VPS28
ARPC5	ATP1B1
ARPC5	C6orf115
ARPC5	CYC1
ARPC5	DCTN1
ARPC5	EIF1
ARPC5	EPS15L1
ARPC5	FARSB
ARPC5	GIT2
ARPC5	GLOD4
ARPC5	HGS
ARPC5	IGF2BP2
ARPC5	KIF2A
ARPC5	LCP1
ARPC5	MRPL15
ARPC5	OLA1
ARPC5	OSBPL9
ARPC5	PRDX6
ARPC5	PRKAR2A
ARPC5	PSMA1
ARPC5	PURB
ARPC5	PYCARD
ARPC5	RAB10
ARPC5	RAB7B
ARPC5	RAB8A
ARPC5	RNH1
ARPC5	STIM1
ARPC5	TIAL1
ARPC5	UBE2N
ARPC5	VPS4B
ARPP19	TMOD3
ARRB1	DDX39B
ARRB1	GTPBP4
ARRB1	HARS2
ARRB1	MCM2
ARRB1	PUS1
ARRB1	RABGGTA
ARRB1	RAP1GDS1
ARRB1	SMARCA5
ARRB1	TCEB2
ARRB2	ATP1A1
ARRB2	COX4NB
ARRB2	EML4
ARRB2	PPP2R2A
ARRB2	XRN2
ARSB	CTSH
ARSB	G3BP2
ARSB	PRDX2
ARSB	RPL26
ARSB	RPS12
ARSB	SNAP29
ARSB	TFAM
ARSB	TIMM13
ASAH1	RPE
ASAH1	UBE2R2
ASAP1	CD81
ASAP1	CHMP4B
ASAP1	CKAP4
ASAP1	MTDH
ASAP1	NSFL1C
ASAP1	NUDC
ASAP1	SH3GLB1
ASAP1	SNAP23
ASAP1	STK10
ASAP1	STRAP
ASAP1	SYNCRIP
ASAP1	YBX1
ASCC3	ATP13A1
ASCC3	CCBL2
ASCC3	DDX3X
ASCC3	DOCK2
ASCC3	DPP3
ASCC3	H6PD
ASCC3	PGM2
ASCC3	PSMD13
ASCC3	RPN1
ASCC3	RPS4Y1
ASCC3	SYK
ASCC3	TSTA3
ASH2L	BAZ1A
ASH2L	BCAS2
ASH2L	CARS
ASH2L	CDKN2AIP
ASH2L	EIF3I
ASH2L	G3BP1
ASH2L	HCCS
ASH2L	MAST2
ASH2L	MST4
ASH2L	NAA50
ASH2L	NUP153
ASH2L	PGK2
ASH2L	PRPF3
ASH2L	PRRC1
ASH2L	RAE1
ASH2L	RBM17
ASH2L	RDBP
ASH2L	RHOA
ASH2L	RPS13
ASH2L	TAB1
ASH2L	TPP2
ASH2L	TSNAX
ASH2L	UBE2V2
ASH2L	YTHDF1
ASL	CUL4B
ASL	LMNA
ASL	MSR1
ASL	PICALM
ASL	PLEC
ASL	PLXNB2
ASL	PTK2B
ASL	UBE2J1
ASL	VAPB
ASNA1	GOLGA4
ASNA1	PECAM1
ASNA1	RAB31
ASNA1	TNKS1BP1
ASNA1	VIM
ASNS	COL4A3BP
ASNS	DDX3Y
ASNS	ESYT2
ASNS	FAR1
ASNS	GSPT1
ASNS	HSPH1
ASNS	NAMPT
ASNS	PAPSS1
ASNS	PTPN6
ASNS	PTPRE
ASNS	RPL5
ASNS	RPS23
ASNS	TLR2
ASNS	USP10
ASPH	ATP6V1C1
ASPH	COX4NB
ASPH	CUL4B
ASPH	GLRX3
ASPH	OSBPL8
ASPH	SNX18
ASPH	ZCCHC6
ASS1	COASY
ASS1	GTF2I
ASS1	HCK
ASS1	ILF2
ASS1	PPME1
ASS1	TCERG1
ASS1	UNKNOWN_SYMBOL
ASS1	USP4
ASS1	WDR5
ATAD3A	DAP
ATAD3A	MACF1
ATAD3A	MSI2
ATAD3A	OXR1
ATAD3A	VASP
ATG3	CANX
ATG3	DCTN4
ATG3	DYNLL1
ATG3	EBNA1BP2
ATG3	EEF1D
ATG3	FAM49B
ATG3	GOT2
ATG3	HIST1H1E
ATG3	IL1B
ATG3	LMAN2
ATG3	LZIC
ATG3	OLA1
ATG3	RPS27A
ATG3	TPM2
ATG7	ATM
ATG7	BICD2
ATG7	BZW2
ATG7	CCT6A
ATG7	CDK5RAP3
ATG7	COG2
ATG7	DCUN1D1
ATG7	DDX46
ATG7	DDX6
ATG7	DHX36
ATG7	GALNT2
ATG7	GSTP1
ATG7	GTPBP4
ATG7	HNRNPC
ATG7	NUP155
ATG7	PANK4
ATG7	PIK3C3
ATG7	PIK3CB
ATG7	PPIP5K2
ATG7	PRKDC
ATG7	PSMD1
ATG7	PSMD2
ATG7	PSMD6
ATG7	RHEB
ATG7	RNMT
ATG7	RPS15A
ATG7	SEPHS1
ATG7	SLC25A3
ATG7	STOM
ATG7	TBCB
[truncated: 10,448 more rows]
