# Supplementary material for: Context-enriched interactome powered by proteomics helps the identification of novel regulators of macrophage activation
Source: eLife. 2018 Oct 10;7:e37059. doi: 10.7554/eLife.37059 (PMC6179386; doi:10.7554/eLife.37059)
Supplement: Figure 1—source data 2. — Co-abundance network for M(IFNg). [file elife-37059-fig1-data2.csv]

A2M	PLEKHA2
AAK1	ACTR3
AAK1	CLIC1
AAK1	DENR
AAK1	EEF1D
AAK1	TCEB2
AAK1	UNKNOWN_SYMBOL
AARS	ACAA1
AARS	ACTG1
AARS	ACTN4
AARS	AFTPH
AARS	AK2
AARS	ARFGAP1
AARS	ATP5O
AARS	BRD4
AARS	CACYBP
AARS	CAPZA1
AARS	CHMP4B
AARS	CIAO1
AARS	CLIP2
AARS	CPT2
AARS	EIF2S1
AARS	EIF4E
AARS	ESD
AARS	GLIPR2
AARS	GLOD4
AARS	GRIPAP1
AARS	HCFC1
AARS	HMGB3
AARS	HNRNPA3
AARS	HNRNPF
AARS	HSPD1
AARS	IL1B
AARS	ILKAP
AARS	LUC7L2
AARS	MTHFD2
AARS	MYL12A
AARS	NAMPT
AARS	NCF2
AARS	NHLRC2
AARS	NUP153
AARS	OTUB1
AARS	PRDX5
AARS	PROSC
AARS	PSMC3
AARS	RAC2
AARS	RAD23A
AARS	RAP1B
AARS	RBBP6
AARS	RBM8A
AARS	RGS1
AARS	SARNP
AARS	SCP2
AARS	SH3BP1
AARS	SHMT2
AARS	SQRDL
AARS	SYNRG
AARS	TAB1
AARS	TPD52L2
AARS	TSFM
AARS	TXNDC17
AARS	VIM
AATF	ASNS
AATF	CDC73
AATF	CUL1
AATF	DOCK5
AATF	MAP4K4
AATF	PABPC4
AATF	ROCK2
AATF	SF3B1
AATF	SPTAN1
AATF	XRCC5
ABCD3	AMPD2
ABCD3	AP3D1
ABCD3	ARFGEF1
ABCD3	BAZ1B
ABCD3	COX4I1
ABCD3	CUL4A
ABCD3	ERLIN1
ABCD3	ESYT2
ABCD3	FERMT2
ABCD3	FKBP5
ABCD3	KRI1
ABCD3	MYO18A
ABCD3	NAA16
ABCD3	PFKL
ABCD3	PGK2
ABCD3	PLCG2
ABCD3	POP1
ABCD3	PPP5C
ABCD3	PSMD1
ABCD3	QARS
ABCD3	RAB3GAP1
ABCD3	RASA1
ABCD3	SARS
ABCD3	THOC1
ABCD3	WDFY4
ABCD3	YKT6
ABCD3	YTHDF2
ABCE1	ACSL4
ABCE1	AP2B1
ABCE1	CCDC25
ABCE1	CCT2
ABCE1	EFTUD1
ABCE1	KTN1
ABCE1	MSN
ABCE1	PRPF3
ABCE1	RPS11
ABCE1	RPS13
ABCE1	RPS24
ABCE1	SSB
ABCE1	TUBB
ABCE1	YWHAE
ABCF1	AHCYL1
ABCF1	ALCAM
ABCF1	ARFIP1
ABCF1	ATP5F1
ABCF1	COPS2
ABCF1	HERC4
ABCF1	HMOX2
ABCF1	IARS2
ABCF1	NNT
ABCF1	NSDHL
ABCF1	RAB35
ABCF1	ROCK1
ABCF1	SEC62
ABCF1	TLN1
ABCF1	USP5
ABCF1	VAPA
ABCF2	ARPC4
ABCF2	CAD
ABCF2	CD9
ABCF2	COX6C
ABCF2	DBI
ABCF2	DDX27
ABCF2	DDX42
ABCF2	DNM1
ABCF2	EPRS
ABCF2	GBE1
ABCF2	GLG1
ABCF2	NAA35
ABCF2	NCBP1
ABCF2	NUMA1
ABCF2	PDS5A
ABCF2	POGLUT1
ABCF2	POGZ
ABCF2	PRPF6
ABCF2	RABGAP1L
ABCF2	SND1
ABCF2	SRPK1
ABCF2	TBC1D9B
ABCF2	TECR
ABCF2	UBR4
ABHD10	CRKL
ABHD10	SQSTM1
ABHD10	TUBB6
ABHD12	AIM1
ABHD12	KARS
ABHD12	NOP56
ABI1	ACTN4
ABI1	AGPS
ABI1	ALDH9A1
ABI1	ALDOA
ABI1	ARFGAP1
ABI1	ATP5I
ABI1	BRD4
ABI1	CDV3
ABI1	CHMP4B
ABI1	CIAO1
ABI1	CLIP2
ABI1	CYCS
ABI1	EIF2S1
ABI1	EIF5A2
ABI1	G3BP1
ABI1	GLIPR2
ABI1	GLOD4
ABI1	GNA13
ABI1	GORASP2
ABI1	GRHPR
ABI1	GSN
ABI1	HADHA
ABI1	HSD17B10
ABI1	HSPA5
ABI1	IDH3G
ABI1	IL1B
ABI1	INTS9
ABI1	ITGB2
ABI1	KRAS
ABI1	LDHB
ABI1	LMNB2
ABI1	LPP
ABI1	LSM2
ABI1	LUC7L2
ABI1	MCTS1
ABI1	MDH2
ABI1	MTHFD2
ABI1	MYL12A
ABI1	NAMPT
ABI1	NCF2
ABI1	NDUFV3
ABI1	NIT2
ABI1	NPLOC4
ABI1	NUP153
ABI1	OSBPL8
ABI1	OXR1
ABI1	PAK2
ABI1	PCBP1
ABI1	PHPT1
ABI1	PITPNA
ABI1	PPIA
ABI1	PROSC
ABI1	PSMC3
ABI1	RAC2
ABI1	RAD23A
ABI1	RBBP6
ABI1	RBM14
ABI1	RBM8A
ABI1	RGS1
ABI1	RHOG
ABI1	RPL26L1
ABI1	SCP2
ABI1	SEPT7
ABI1	SH3BP1
ABI1	SQRDL
ABI1	STX12
ABI1	SYNRG
ABI1	TAGLN2
ABI1	TCERG1
ABI1	TPD52
ABI1	UCHL3
ABI1	UQCRB
ABI1	WIBG
ABI1	YWHAZ
ABI1	ZNF281
ABI1	ZNF318
ABR	ACLY
ABR	COPS5
ABR	CPSF2
ABR	EEF2
ABR	FARSA
ABR	FIS1
ABR	GPI
ABR	NXF1
ABR	PAICS
ABR	RPS16
ABR	TOP2B
ABR	TTC37
ACAA1	ACTG1
ACAA1	ACTN4
ACAA1	ALDOA
ACAA1	ARFGAP1
ACAA1	ATP5I
ACAA1	CACYBP
ACAA1	CBL
ACAA1	CBWD1
ACAA1	CHMP4B
ACAA1	CIAO1
ACAA1	EIF5A2
ACAA1	ETFA
ACAA1	FAM129A
ACAA1	FAM129B
ACAA1	FUBP3
ACAA1	GBAS
ACAA1	GBP1
ACAA1	GLIPR2
ACAA1	GLOD4
ACAA1	GOPC
ACAA1	HCFC1
ACAA1	IDH1
ACAA1	IDH3G
ACAA1	IQGAP2
ACAA1	KRAS
ACAA1	LPP
ACAA1	LRRC47
ACAA1	LSM2
ACAA1	LUC7L2
ACAA1	MAP1S
ACAA1	MDH2
ACAA1	MTHFD2
ACAA1	NAMPT
ACAA1	OSBPL8
ACAA1	OTUB1
ACAA1	PFN1
ACAA1	PPA1
ACAA1	PPIA
ACAA1	PRDX5
ACAA1	PSAT1
ACAA1	PSMA7
ACAA1	RAC2
ACAA1	RBM14
ACAA1	RBM8A
ACAA1	RGS1
ACAA1	RHOG
ACAA1	RPL26L1
ACAA1	SARNP
ACAA1	SEPT7
ACAA1	SH3BP1
ACAA1	SQRDL
ACAA1	SRGAP2
ACAA1	SYNRG
ACAA1	TAGLN2
ACAA1	TMED5
ACAA1	TMOD3
ACAA1	TNKS1BP1
ACAA1	TPD52
ACAA1	TSFM
ACAA1	UBE2J1
ACAA1	UCHL3
ACAA1	VIM
ACAA1	WIBG
ACAA1	XPNPEP1
ACAA1	YWHAZ
ACAA1	ZNF281
ACAA2	AK2
ACAA2	CPT2
ACAA2	ESD
ACAA2	HIBADH
ACAA2	HNRNPA3
ACAA2	HNRNPD
ACAA2	HNRNPUL2
ACAA2	HSPA9
ACAA2	IDH2
ACAA2	ILKAP
ACAA2	MCTS1
ACAA2	NAMPT
ACAA2	NCF2
ACAA2	PROSC
ACAA2	PSAT1
ACAA2	QKI
ACAA2	RAB31
ACAA2	RBM8A
ACAA2	RPL29
ACAA2	RPS12
ACAA2	RPS21
ACAA2	SARNP
ACAA2	SHMT2
ACAA2	SNRPC
ACAA2	TAB1
ACAA2	TACC1
ACAA2	WIBG
ACAA2	YTHDF1
ACAD9	ACOT7
ACAD9	ADAP1
ACAD9	API5
ACAD9	ATP1B3
ACAD9	BROX
ACAD9	BZW2
ACAD9	CAND1
ACAD9	CD36
ACAD9	CDK5RAP3
ACAD9	CDK9
ACAD9	CEBPZ
ACAD9	CTNNBL1
ACAD9	CUL3
ACAD9	DAP3
ACAD9	DARS2
ACAD9	DDX19A
ACAD9	DENND3
ACAD9	DRG1
ACAD9	EIF3L
ACAD9	HCK
ACAD9	HEATR3
ACAD9	HMGCS1
ACAD9	HMGN2
ACAD9	HMHA1
ACAD9	KIF2A
ACAD9	LEMD2
ACAD9	LRPPRC
ACAD9	MAPRE2
ACAD9	METTL7A
ACAD9	NSMAF
ACAD9	PANK4
ACAD9	PDS5B
ACAD9	PIK3CB
ACAD9	PPIL3
ACAD9	PREP
ACAD9	PRKDC
ACAD9	PSMD1
ACAD9	RAB3GAP1
ACAD9	RASA1
ACAD9	SAR1A
ACAD9	SKIV2L2
ACAD9	SMC3
ACAD9	SRP68
ACAD9	SUPT16H
ACAD9	TARS
ACAD9	VAC14
ACAD9	XPO1
ACAD9	ZNF830
ACADM	BANF1
ACADM	COX4NB
ACADM	NDRG2
ACADM	NUP37
ACADM	PHGDH
ACADM	SSBP1
ACADS	CBS
ACADS	CPSF2
ACADS	CSNK2A2
ACADS	DDX39A
ACADS	DIAPH1
ACADS	DNAJC13
ACADS	DNAJC7
ACADS	DPP9
ACADS	EIF3M
ACADS	FAM105A
ACADS	IKBKG
ACADS	MTHFD1
ACADS	PRMT1
ACADS	RAB10
ACADS	RPS10
ACADS	RPS16
ACADS	RPS7
ACADS	SEC24D
ACADS	SLC25A1
ACADS	SRPR
ACADS	STRBP
ACADS	TALDO1
ACADS	TIAL1
ACADS	TOP2B
ACADS	TRAP1
ACADS	TTC37
ACADS	UAP1L1
ACADS	UBAP2L
ACADS	UPF1
ACADS	VAV1
ACADVL	ACLY
ACADVL	AP1B1
ACADVL	DHX29
ACADVL	DHX9
ACAP2	ADAP1
ACAP2	API5
ACAP2	BCLAF1
ACAP2	BRD3
ACAP2	BZW1
ACAP2	CDK5RAP3
ACAP2	CDK9
ACAP2	DARS2
ACAP2	DDX19B
ACAP2	DENND3
ACAP2	FDPS
ACAP2	HCK
ACAP2	HSPA14
ACAP2	INF2
ACAP2	IST1
ACAP2	KIF2A
ACAP2	PARP1
ACAP2	PPIL3
ACAP2	PUM2
ACAP2	RANBP3
ACAP2	SAR1A
ACAP2	STMN1
ACAP2	TBCA
ACAP2	TMED9
ACAP2	USP8
ACAT1	AIMP2
ACAT1	RAP1A
ACAT1	RPLP2
ACAT2	MYO18A
ACAT2	UBA1
ACBD3	AFP
ACBD3	AHSG
ACBD3	ALB
ACBD3	C21orf33
ACBD3	CHCHD3
ACBD3	DLAT
ACBD3	DLGAP4
ACBD3	ERP44
ACBD3	FKBP3
ACBD3	P4HB
ACBD3	PARK7
ACBD3	PHB
ACBD3	PPM1A
ACBD3	PPP1R9B
ACBD3	PRDX3
ACBD3	SRSF2
ACBD3	STIP1
ACBD3	UQCRC1
ACBD3	VCPIP1
ACIN1	AHSA1
ACIN1	ATOX1
ACIN1	C1orf123
ACIN1	CBX5
ACIN1	GLMN
ACIN1	GLUL
ACIN1	GNAI2
ACIN1	GPX1
ACIN1	HNRNPUL1
ACIN1	MAPKAPK2
ACIN1	MAT2B
ACIN1	MRPS31
ACIN1	NPC2
ACIN1	PPIH
ACIN1	PPIL1
ACIN1	PPP3R1
ACIN1	PRDX2
ACIN1	RBM39
ACIN1	RNH1
ACIN1	RPS27A
ACIN1	SF3A1
ACIN1	TOMM34
ACIN1	UBE2K
ACIN1	UBE2N
ACIN1	ZEB2
ACLY	CDC5L
ACLY	DHX29
ACLY	TCP1
ACO1	GART
ACO1	RHOA
ACO1	SERPINB8
ACO2	ACTG1
ACO2	AK2
ACO2	CACYBP
ACO2	CBR1
ACO2	CHMP4B
ACO2	CIAO1
ACO2	CPT2
ACO2	DECR1
ACO2	DYNC1I2
ACO2	GBP1
ACO2	GLIPR2
ACO2	GRIPAP1
ACO2	HSPA5
ACO2	HSPE1
ACO2	ILKAP
ACO2	KLC1
ACO2	LGALS1
ACO2	MDH2
ACO2	NANS
ACO2	PRDX1
ACO2	PRDX5
ACO2	PSME1
ACO2	RCC1
ACO2	SNRPC
ACO2	STOML2
ACO2	TGM2
ACO2	UCHL3
ACO2	WARS
ACO2	YTHDF1
ACO2	ZYX
ACOT2	ADPGK
ACOT2	ALDOC
ACOT2	ANO6
ACOT2	AP1M1
ACOT2	AP2A2
ACOT2	APEX1
ACOT2	C6orf211
ACOT2	CAB39
ACOT2	CAST
ACOT2	CORO1B
ACOT2	CPNE2
ACOT2	CTSA
ACOT2	CTSC
ACOT2	DNAJC7
ACOT2	EBNA1BP2
ACOT2	ECH1
ACOT2	EIF1B
ACOT2	EIF3G
ACOT2	EPB41L3
ACOT2	EPN1
ACOT2	FAM105A
ACOT2	GALNT2
ACOT2	GANAB
ACOT2	GIT2
ACOT2	GSTM4
ACOT2	HK1
ACOT2	HNRNPU
ACOT2	HSPB1
ACOT2	IGF2BP2
ACOT2	ITGAL
ACOT2	KIAA0090
ACOT2	LIPA
ACOT2	LYN
ACOT2	LZIC
ACOT2	MOV10
ACOT2	MRPL11
ACOT2	NAA10
ACOT2	NCK1
ACOT2	NCL
ACOT2	NPL
ACOT2	OAS2
ACOT2	OAS3
ACOT2	PABPN1
ACOT2	PACSIN2
ACOT2	PPFIBP1
ACOT2	PSMA5
ACOT2	PSMD13
ACOT2	PTPRC
ACOT2	RAB5C
ACOT2	RBBP4
ACOT2	RPS15A
ACOT2	SF3A2
ACOT2	SNX6
ACOT2	TBCE
ACOT2	TFAM
ACOT2	TIAL1
ACOT2	TPT1
ACOT2	TSG101
ACOT2	UBAP2L
ACOT2	VTA1
ACOT2	WASF2
ACOT7	AP3D1
ACOT7	ARPC4
ACOT7	BAZ1B
ACOT7	BOD1L
ACOT7	BZW2
ACOT7	CAD
ACOT7	CPSF3
ACOT7	DARS
ACOT7	DDX27
ACOT7	DDX42
ACOT7	DRG1
ACOT7	EIF3L
ACOT7	EIF4G3
ACOT7	EPRS
ACOT7	HBS1L
ACOT7	HMHA1
ACOT7	HSD17B11
ACOT7	LRRC59
ACOT7	MAPRE2
ACOT7	MCM6
ACOT7	NAA35
ACOT7	NSMAF
ACOT7	PDS5B
ACOT7	POGZ
ACOT7	PRPF6
ACOT7	RAB3GAP1
ACOT7	RAB3GAP2
ACOT7	RABGAP1L
ACOT7	SARS
ACOT7	SKIV2L2
ACOT7	SND1
ACOT7	TECR
ACOT7	TFB2M
ACOT9	RPL18A
ACOT9	STAT3
ACSL1	MTSS1
ACSL3	ARHGDIB
ACSL3	BSG
ACSL3	CANX
ACSL3	IK
ACSL3	LBR
ACSL3	NUTF2
ACSL3	PFDN1
ACSL3	PTGES2
ACSL3	S100A6
ACSL3	UBE2M
ACSL3	VPS4A
ACSL3	ZNF259
ACSL4	ANXA11
ACSL4	CARS
ACSL4	CC2D1B
ACSL4	CELF1
ACSL4	CIRBP
ACSL4	ELAVL1
ACSL4	H2AFX
ACSL4	KIF13B
ACSL4	MRPS7
ACSL4	PRPS1
ACSL4	RPL27
ACSL4	RPS14
ACSL4	RPS20
ACSL4	SH3GL1
ACSL4	SNRPD3
ACSL4	SSB
ACSL4	STK38L
ACSL4	TKT
ACSL4	USP15
ACSL5	BAZ1A
ACSL5	DNAJC10
ACSL5	DOCK8
ACSL5	IMPAD1
ACSS2	AP1B1
ACSS2	AP1G1
ACSS2	AP2A1
ACSS2	ARHGAP1
ACSS2	ARIH2
ACSS2	ASCC3
ACSS2	ATP6V0D1
ACSS2	ATP6V1C1
ACSS2	BCLAF1
ACSS2	CAB39
ACSS2	CLTC
ACSS2	CPNE2
ACSS2	DDX18
ACSS2	DIS3
ACSS2	DNAJC2
ACSS2	DOCK2
ACSS2	DPP9
ACSS2	EIF3G
ACSS2	EIF4A2
ACSS2	EPHX1
ACSS2	FAM105A
ACSS2	FERMT3
ACSS2	HM13
ACSS2	HTT
ACSS2	IGF2BP2
ACSS2	ITGAL
ACSS2	KIAA0020
ACSS2	KIAA0090
ACSS2	MYBBP1A
ACSS2	NAA25
ACSS2	OAS2
ACSS2	PACSIN2
ACSS2	PANK4
ACSS2	PARP1
ACSS2	PLXNB2
ACSS2	PRPF8
ACSS2	PSME3
ACSS2	RAB10
ACSS2	RAB5C
ACSS2	RAB7A
ACSS2	RABGGTA
ACSS2	RANBP3
ACSS2	RECQL
ACSS2	RPL7L1
ACSS2	RPS2
ACSS2	SBDS
ACSS2	SLC25A5
ACSS2	SNRNP200
ACSS2	SNRPA
ACSS2	SUPT16H
ACSS2	TFRC
ACSS2	TRMT5
ACSS2	UPF1
ACSS2	XPO7
ACSS2	ZMPSTE24
ACTBL2	CAMK1
ACTBL2	ECHS1
ACTBL2	SNRPD2
ACTBL2	YY1
ACTG1	ACTN4
ACTG1	ARPC3
ACTG1	ATP5I
ACTG1	ATP5O
ACTG1	BMP2K
ACTG1	CBWD1
ACTG1	FAM129B
ACTG1	FUBP3
ACTG1	HP1BP3
ACTG1	HSD17B10
ACTG1	IDH1
ACTG1	LPP
ACTG1	NAMPT
ACTG1	PSMA7
ACTG1	SNX3
ACTG1	SQRDL
ACTG1	SRGAP2
ACTG1	SYNRG
ACTG1	TMED5
ACTG1	TMOD3
ACTL6A	ADNP
ACTL6A	FAH
ACTL6A	IST1
ACTL6A	LONP1
ACTL6A	LUC7L3
ACTL6A	MARS
ACTL6A	PPA2
ACTL6A	QPRT
ACTL6A	RAD21
ACTL6A	STMN1
ACTL6A	UBE2I
ACTN1	ACTN4
ACTN1	ANXA1
ACTN1	ARPC1B
ACTN1	ASAP1
ACTN1	ATP6V1B2
ACTN1	BAT3
ACTN1	BCAS2
ACTN1	CAPG
ACTN1	CDC37
ACTN1	CDV3
ACTN1	CLIP2
ACTN1	CYCS
ACTN1	FAM129A
ACTN1	FUS
ACTN1	GBAS
ACTN1	GLUD2
ACTN1	HMOX2
ACTN1	IRAK4
ACTN1	MCCC2
ACTN1	MDH1
ACTN1	MTCH2
ACTN1	MTDH
ACTN1	NDUFA10
ACTN1	NIT2
ACTN1	NUBP1
ACTN1	OXCT1
ACTN1	PDXDC1
ACTN1	PNPT1
ACTN1	PPP3CA
ACTN1	PSMC2
ACTN1	PURA
ACTN1	RAI14
ACTN1	RBMXL1
ACTN1	RPL26L1
ACTN1	SEPT7
ACTN1	STK24
ACTN1	TPD52
ACTN1	VASP
ACTN1	VPS37A
ACTN1	WDR1
ACTN1	YWHAG
ACTN4	ALDOA
ACTN4	APIP
ACTN4	ARL3
ACTN4	ARPC3
ACTN4	ASPH
ACTN4	ATP5I
ACTN4	BMP2K
ACTN4	CBWD1
ACTN4	CHMP4B
ACTN4	EIF2S1
ACTN4	EIF5A2
ACTN4	ENO1
ACTN4	ETFA
ACTN4	FAM129A
ACTN4	FAM129B
ACTN4	G3BP1
ACTN4	GMFG
ACTN4	GNA13
ACTN4	GOPC
ACTN4	HRAS
ACTN4	HSD17B10
ACTN4	IDH1
ACTN4	IL1B
ACTN4	IQGAP2
ACTN4	IRAK4
ACTN4	KLC2
ACTN4	KRAS
ACTN4	LPP
ACTN4	LSM2
ACTN4	LSM6
ACTN4	MAP1S
ACTN4	MCCC2
ACTN4	MDH2
ACTN4	MTHFD2
ACTN4	PAK2
ACTN4	PDIA6
ACTN4	PPA1
ACTN4	PSMA7
ACTN4	PSMB1
ACTN4	PXN
ACTN4	RAD23A
ACTN4	RCC1
ACTN4	RCOR1
ACTN4	RHOC
ACTN4	RPL26L1
ACTN4	SARNP
ACTN4	SEPT7
ACTN4	SH3BP1
ACTN4	SRGAP2
ACTN4	TAB1
ACTN4	TCEB1
ACTN4	TNKS1BP1
ACTN4	TNRC6B
ACTN4	TPD52
ACTN4	TXNDC17
ACTN4	UBE2J1
ACTN4	UBXN4
ACTN4	UCHL3
ACTN4	VASP
ACTN4	VIM
ACTN4	WDR1
ACTN4	YWHAZ
ACTN4	ZNF281
ACTR1A	AKR1B1
ACTR1A	APPL1
ACTR1A	ARHGAP17
ACTR1A	ARHGAP4
ACTR1A	ATP2A3
ACTR1A	CCT2
ACTR1A	DDOST
ACTR1A	DDX1
ACTR1A	EXOC7
ACTR1A	GSPT1
ACTR1A	KIAA1468
ACTR1A	KPNA1
ACTR1A	MLTK
ACTR1A	MSN
ACTR1A	PCF11
ACTR1A	POLR2A
ACTR1A	PRRC1
ACTR1A	RPN1
ACTR1A	RPS13
ACTR1A	SNTB1
ACTR1A	TIPRL
ACTR1B	RBM4
ACTR1B	USP10
ACTR2	AP3M1
ACTR2	IKBKB
ACTR2	MAT2A
ACTR2	MYH10
ACTR2	POLR1A
ACTR2	POR
ACTR2	SEC63
ACTR2	SMARCA4
ACTR3	EEF1D
ACTR3	SNRPD2
ACTR3	UNKNOWN_SYMBOL
ADAM10	ALDH1L2
ADAM10	DENND4C
ADAM10	DHX36
ADAM10	DPYSL2
ADAM10	EIF2C1
ADAM10	ESF1
ADAM10	HNRNPA0
ADAM10	IKBIP
ADAM10	MMP14
ADAM10	STXBP3
ADAM17	AK1
ADAM17	C21orf33
ADAM17	CHMP4B
ADAM17	DLGAP4
ADAM17	DLST
ADAM17	ERLEC1
ADAM17	ERP29
ADAM17	ETFA
ADAM17	FNDC3A
ADAM17	FUBP1
ADAM17	HIBADH
ADAM17	HMGB1
ADAM17	HMGB3
ADAM17	HNRNPF
ADAM17	HSPA9
ADAM17	ILKAP
ADAM17	LUC7L2
ADAM17	MYL12A
ADAM17	NANS
ADAM17	NAP1L1
ADAM17	NUFIP2
ADAM17	OXR1
ADAM17	PAK2
ADAM17	PARK7
ADAM17	PHPT1
ADAM17	PSAT1
ADAM17	QKI
ADAM17	S100A10
ADAM17	SDHB
ADAM17	SRSF1
ADAM17	TACC1
ADAM17	TGM2
ADAM17	TLN2
ADAM17	UQCRC1
ADAM17	VAPB
ADAM17	WDR1
ADAM17	ZNF318
ADAM9	GGA1
ADAM9	HNRNPH2
ADAM9	HNRNPL
ADAM9	OS9
ADAM9	VPS4B
ADAP1	API5
ADAP1	BRD3
ADAP1	BROX
ADAP1	BZW1
ADAP1	CDK5RAP3
ADAP1	CDK9
ADAP1	DARS2
ADAP1	DDX19B
ADAP1	DDX46
ADAP1	DENND3
ADAP1	DRG1
ADAP1	EIF3L
ADAP1	FDPS
ADAP1	GSS
ADAP1	HSPA14
ADAP1	INF2
ADAP1	IST1
ADAP1	KIF2A
ADAP1	LEMD2
ADAP1	OAT
ADAP1	PARP1
ADAP1	PIK3CB
ADAP1	PITPNB
ADAP1	PPIL3
ADAP1	PPP1R10
ADAP1	PRPF8
ADAP1	RGS10
ADAP1	SAR1A
ADAP1	TBCA
ADAP1	TMED9
ADAP1	USP8
ADAP1	USP9X
ADAP1	ZNF830
ADAR	CBR1
ADAR	CLIP1
ADAR	DECR1
ADAR	DLST
ADAR	DNAJA2
ADAR	DYNC1I2
ADAR	GBP1
ADAR	HIBADH
ADAR	HNRNPA3
ADAR	HSPA9
ADAR	HSPE1
ADAR	IDH2
ADAR	LASP1
ADAR	NUFIP2
ADAR	PCMT1
ADAR	RBM8A
ADAR	RPS21
ADAR	SDHB
ADAR	SLTM
ADAR	SRSF1
ADAR	SUCLG1
ADAR	TACC1
ADAR	TUBA1C
ADAR	TUFM
ADAR	ZYX
ADH5	EIF3K
ADH5	GDI1
ADH5	GTF2F2
ADH5	HIST1H2AB
ADH5	PNP
ADH5	PTBP3
ADH5	RUVBL1
ADH5	TCEA1
ADH5	VPS25
ADK	AP2A1
ADK	API5
ADK	ARHGEF6
ADK	BPNT1
ADK	CALM1
ADK	CSE1L
ADK	CSTF3
ADK	CUL3
ADK	DDB1
ADK	DDX19B
ADK	DGKZ
ADK	DNAJC7
ADK	DPP9
ADK	DTYMK
ADK	FEN1
ADK	FHL1
ADK	G6PD
ADK	GNA12
ADK	GTF2I
ADK	HDAC1
ADK	HNMT
ADK	IKBKG
ADK	KIAA0020
ADK	KYNU
ADK	MCM5
ADK	MCM7
ADK	NACA
ADK	P4HA1
ADK	PDCD11
ADK	PDXK
ADK	PGAM1
ADK	POLD1
ADK	PPP1CC
ADK	PRKDC
ADK	PRMT1
ADK	PRPF31
ADK	PRPF8
ADK	PSIP1
ADK	PUM2
ADK	RAB13
ADK	RAP1GDS1
ADK	RPL11
ADK	RPS10
ADK	RPS7
ADK	SEC24D
ADK	SKIV2L2
ADK	SNRPB2
ADK	STRBP
ADK	UAP1L1
ADK	UBE2O
ADK	UFL1
ADK	UTP18
ADK	XRN2
ADNP	BRD3
ADNP	CDK5RAP3
ADNP	CDK9
ADNP	DDX46
ADNP	DENND3
ADNP	GCN1L1
ADNP	GLO1
ADNP	HCK
ADNP	HMGCS1
ADNP	HSPA14
ADNP	INF2
ADNP	MARS
ADNP	NENF
ADNP	PIK3CB
ADNP	PPIL3
ADNP	PUM2
ADNP	RAD21
ADNP	SAR1A
ADNP	SKIV2L2
ADNP	SMARCC1
ADNP	STMN1
ADNP	TBCA
ADPGK	ALDOC
ADPGK	AP1G1
ADPGK	AP2A2
ADPGK	APMAP
ADPGK	APRT
ADPGK	BTF3L4
ADPGK	CALU
ADPGK	CS
ADPGK	CSNK2A2
ADPGK	EBNA1BP2
ADPGK	ECH1
ADPGK	EIF4G2
ADPGK	EPN1
ADPGK	FAM105A
ADPGK	GALNT2
ADPGK	GANAB
ADPGK	GBA
ADPGK	GIT2
ADPGK	GLMN
ADPGK	GMPPB
ADPGK	GSTM1
ADPGK	GSTM4
ADPGK	HEXA
ADPGK	HMGA1
ADPGK	HNRNPC
ADPGK	HNRNPU
ADPGK	HTATSF1
ADPGK	IGF2BP2
ADPGK	IKBKG
ADPGK	KCNAB2
ADPGK	KIAA0090
ADPGK	LIPA
ADPGK	MARCKS
ADPGK	NCK1
ADPGK	NCL
ADPGK	NME2
ADPGK	NUDT21
ADPGK	NUP93
ADPGK	PDCD6
ADPGK	PGM2
ADPGK	PITPNB
ADPGK	PLXNB2
ADPGK	PPP3R1
ADPGK	PPT1
ADPGK	PRDX6
ADPGK	PSIP1
ADPGK	PSMA5
ADPGK	PSMD13
ADPGK	PSMD14
ADPGK	PTGES3
ADPGK	RAP1GDS1
ADPGK	RPN2
ADPGK	RPS15A
ADPGK	SERBP1
ADPGK	SF3A2
ADPGK	SNRPB2
ADPGK	SRRT
ADPGK	SSR3
ADPGK	SUMO2
ADPGK	TALDO1
ADPGK	TFAM
ADPGK	TFRC
ADPGK	TGFBI
ADPGK	TIAL1
ADPGK	TIMM44
ADPGK	TNPO1
ADPGK	UBE4A
ADPGK	VCL
ADPGK	VPS35
ADPGK	VTA1
ADPGK	ZC3H15
ADRBK1	APEX1
ADRBK1	C1orf123
ADRBK1	CPPED1
ADRBK1	DNAJB1
ADRBK1	ETFB
ADRBK1	EWSR1
ADRBK1	HNRPDL
ADRBK1	LY75
ADRBK1	NHP2L1
ADRBK1	PPP1CA
ADRBK1	RAB7B
ADRBK1	RPS27A
ADRBK1	SELRC1
ADRBK1	SF3A1
ADRBK1	SRP9
ADRBK1	THRAP3
ADRBK1	UBE2K
ADRBK1	ZC3H15
ADRM1	ANKRD44
ADRM1	APOA1BP
ADRM1	CASP1
ADRM1	GBP2
ADRM1	ILK
ADRM1	RPS23
ADRM1	SERPINC1
ADRM1	SUCLG2
ADSL	AP1B1
ADSL	CD36
ADSL	CPSF3
ADSL	CTR9
ADSL	DHX9
ADSL	DOCK11
ADSL	DOCK2
ADSL	DYNC1H1
ADSL	EIF2C2
ADSL	FASN
ADSL	ILF2
ADSL	MRTO4
ADSL	PFKL
ADSL	PRPF19
ADSL	PRPF6
ADSL	PRPF8
ADSL	QARS
ADSL	RAB7A
ADSL	SBDS
ADSL	SNRNP200
ADSL	SRP72
ADSL	TARS
ADSL	THOC1
ADSL	TROVE2
ADSL	WDR91
ADSL	XPO1
ADSL	ZMPSTE24
ADSS	AHCY
ADSS	PRKAA1
ADSS	RAB5A
ADSS	SRC
ADSS	UCHL5
AFG3L2	AHNAK
AFG3L2	APOOL
AFG3L2	CLYBL
AFG3L2	CTTN
AFG3L2	DAB2
AFG3L2	GOLGA4
AFG3L2	HAGH
AFG3L2	HEBP1
AFG3L2	IMMT
AFG3L2	NDUFA10
AFG3L2	PC
AFG3L2	POTEI
AFG3L2	PTK2B
AFG3L2	RAB2A
AFG3L2	S100A4
AFG3L2	TGOLN2
AFG3L2	TXNL1
AFG3L2	UGP2
AFG3L2	VAT1
AFP	AK1
AFP	ALB
AFP	CHCHD3
AFP	DLAT
AFP	DLGAP4
AFP	DLST
AFP	EEA1
AFP	ERP44
AFP	FUBP1
AFP	HDGF
AFP	MYL6B
AFP	PARK7
AFP	PHB
AFP	PPP1R9B
AFP	RAD23B
AFP	RPLP1
AFP	SDHB
AFP	STIP1
AFP	STOML2
AFP	UQCRC1
AFP	VCPIP1
AFTPH	AK1
AFTPH	APIP
AFTPH	ARHGAP15
AFTPH	BRD4
AFTPH	CCDC47
AFTPH	CDV3
AFTPH	CLYBL
AFTPH	GORASP2
AFTPH	GRIPAP1
AFTPH	HSPD1
AFTPH	IGBP1
AFTPH	INTS9
AFTPH	IRF2BPL
AFTPH	KRAS
AFTPH	LACTB2
AFTPH	LMNB2
AFTPH	LUC7L2
AFTPH	MDH2
AFTPH	MTDH
AFTPH	NUMB
AFTPH	NUP214
AFTPH	OXR1
AFTPH	PAK2
AFTPH	PCBP1
AFTPH	PDXDC1
AFTPH	PITPNA
AFTPH	PSMC3
AFTPH	PSMD4
AFTPH	RAD23A
AFTPH	RBM14
AFTPH	SARNP
AFTPH	SCP2
AFTPH	SH3BP1
AFTPH	STK10
AFTPH	STX12
AFTPH	SUB1
AFTPH	SYAP1
AFTPH	TAGLN2
AFTPH	TCERG1
AFTPH	TNKS1BP1
AFTPH	TRIP11
AFTPH	TXNDC17
AFTPH	VAPB
AFTPH	YARS
AFTPH	ZNF281
AGFG1	EVI2B
AGFG1	HEBP1
AGFG1	KLRAQ1
AGFG1	NDUFB9
AGK	CHORDC1
AGK	COTL1
AGK	DYNC1LI2
AGK	ILK
AGK	LACTB
AGK	MATR3
AGK	PPP1R7
AGK	RAP1B
AGK	RBMS1
AGK	RPL29
AGK	SCAF11
AGK	SUCLG2
AGK	TWF2
AGL	AIP
AGL	SEPT2
AGPS	ALDH9A1
AGPS	ANXA11
AGPS	CASP8
AGPS	CBL
AGPS	DHRS4
AGPS	EIF4E
AGPS	ELAVL1
AGPS	FUBP3
AGPS	GMFG
AGPS	HSD17B10
AGPS	IDH3G
AGPS	IL1B
AGPS	IMPDH1
AGPS	INPPL1
AGPS	KIAA1598
AGPS	KIF13B
AGPS	LACTB
AGPS	LRRC47
AGPS	LUC7L2
AGPS	MAP2K1
AGPS	MRPS25
AGPS	MTHFD2
AGPS	NDUFV3
AGPS	NUP153
AGPS	PFN1
AGPS	PHF6
AGPS	PPIA
AGPS	PSMA7
AGPS	RHOG
AGPS	RPL17
AGPS	RPL29
AGPS	RPS19
AGPS	SART1
AGPS	SH3BP1
AGPS	TKT
AGPS	TMED5
AGPS	TMOD3
AGPS	TPD52
AGPS	TSFM
AGPS	UBE2V1
AGPS	UQCRC2
AGPS	USP15
AHCTF1	ARAP1
AHCTF1	ATP6V1H
AHCTF1	DDX3Y
AHCTF1	DIAPH2
AHCTF1	MMP14
AHCTF1	PLRG1
AHCTF1	PPIP5K2
AHCTF1	RASA3
AHCTF1	RPL5
AHCTF1	RPL9
AHCTF1	SCYL2
AHCTF1	SMEK1
AHCTF1	SNX9
AHCTF1	TPP2
AHCTF1	TRAPPC8
AHCTF1	UGGT1
AHCTF1	VPS26A
AHCY	EIF2S3
AHCY	EIF3K
AHCY	FAM91A1
AHCY	FAM98A
AHCY	MST4
AHCY	NDUFB10
AHCY	RAB5A
AHCYL1	ALDH1L2
AHCYL1	ARFIP1
AHCYL1	ASAP1
AHCYL1	ATP1A1
AHCYL1	ATP6V1B2
AHCYL1	ATXN2
AHCYL1	CAMSAP1
AHCYL1	CAP1
AHCYL1	CISD2
AHCYL1	COPS2
AHCYL1	DDX1
AHCYL1	DDX24
AHCYL1	DHX36
AHCYL1	FAM49B
AHCYL1	HMOX2
AHCYL1	ITPR2
AHCYL1	KIF5B
AHCYL1	MAD1L1
AHCYL1	POTEF
AHCYL1	RAB1A
AHCYL1	RAB8B
AHCYL1	ROCK1
AHCYL1	RPL9
AHCYL1	SCYL2
AHCYL1	SEC62
AHCYL1	STK3
AHCYL1	UBFD1
AHCYL1	USP5
AHCYL1	YWHAB
AHNAK	ARHGAP30
AHNAK	ARL3
AHNAK	ASPH
AHNAK	CTTN
AHNAK	DAB2
AHNAK	DNAJB11
AHNAK	FNDC3A
AHNAK	GLUD2
AHNAK	IDH3A
AHNAK	KIF5B
AHNAK	MTDH
AHNAK	NDUFA10
AHNAK	OGDH
AHNAK	PPP2R1A
AHNAK	PSMC3
AHNAK	PTK2B
AHNAK	SH3KBP1
AHNAK	SLK
AHNAK	SYNCRIP
AHNAK	TNRC6B
AHNAK	TNS3
AHNAK	UGP2
AHNAK	WIBG
AHSA1	EIF4G2
AHSA1	FAH
AHSA1	GLMN
AHSA1	GLUL
AHSA1	GPX1
AHSA1	MAT2B
AHSA1	ME1
AHSA1	PLXND1
AHSA1	PPIH
AHSA1	RBBP4
AHSA1	RPS27A
AHSA1	SAE1
AHSA1	UBE2K
AHSG	ALB
AHSG	B2M
AHSG	C21orf33
AHSG	CNDP2
AHSG	HSPA9
AHSG	LASP1
AHSG	PARK7
AHSG	PCK2
AHSG	PPP1R9B
AHSG	PYCARD
AHSG	VDAC2
AIF1	APEX1
AIF1	ATOX1
AIF1	BTF3L4
AIF1	C1orf123
AIF1	C6orf211
AIF1	CTSC
AIF1	DBNL
AIF1	EWSR1
AIF1	GLMN
AIF1	HNRPLL
AIF1	LIMS1
AIF1	LY75
AIF1	NPL
AIF1	PRPF4
AIF1	RAB7B
AIF1	RBM39
AIF1	RNASET2
AIF1	SAFB
AIF1	SRRM1
AIF1	THRAP3
AIF1	TOMM34
AIF1	TOR1AIP1
AIF1	YWHAQ
AIF1	ZC3H15
AIFM1	CLIC4
AIFM1	HADHB
AIFM1	PDHX
AIFM1	PSMA1
AIFM1	VCP
AIM1	RPL3
AIMP2	CETN2
AIMP2	MIA3
AIMP2	NF2
AIMP2	SDF4
AIMP2	XRCC1
AIP	FAM21C
AIP	IMMT
AIP	PC
AIP	ZMYND8
AK1	ALDH4A1
AK1	ARPP19
AK1	CDV3
AK1	CIAO1
AK1	CLYBL
AK1	DLST
AK1	DNAJB11
AK1	EIF5A2
AK1	ERLEC1
AK1	ERP29
AK1	ETFA
AK1	FNDC3A
AK1	FUBP1
AK1	GRIPAP1
AK1	HEBP2
AK1	HSPA5
AK1	HSPD1
AK1	IDH3A
AK1	KLC1
AK1	LSM2
AK1	NANS
AK1	NAP1L1
AK1	NUFIP2
AK1	OGDH
AK1	PARK7
AK1	PSMD4
AK1	S100A11
AK1	SH3GLB1
AK1	SLK
AK1	SNX18
AK1	STOML2
AK1	STX12
AK1	TGM2
AK1	TLN2
AK1	TPM2
AK1	UQCRC1
AK1	VAPB
AK1	VDAC1
AK1	VIM
AK1	WIBG
AK1	YARS
AK2	ATP5O
AK2	CAPZA1
AK2	CHMP4B
AK2	CPT2
AK2	EIF4E
AK2	ESD
AK2	GLOD4
AK2	HMGB3
AK2	HNRNPD
AK2	HSD17B10
AK2	HSPA9
AK2	IDH2
AK2	KLC1
AK2	LMNB2
AK2	MCTS1
AK2	MTHFD2
AK2	NAMPT
AK2	NCF2
AK2	PRKRA
AK2	PROSC
AK2	PSAT1
AK2	QKI
AK2	RAB31
AK2	RAC2
AK2	RBM8A
AK2	RGS1
AK2	SARNP
AK2	SCFD1
AK2	SQRDL
AK2	SRSF1
AK2	SYNRG
AK2	TAB1
AK2	TACC1
AK2	TMPO
AK2	TXNDC17
AK2	UBE2V1
AK2	YTHDF1
AK2	ZNF318
AK2	ZYX
AK3	ASS1
AK3	BAG2
AK3	BANF1
AK3	CASP3
AK3	CTSS
AK3	DAP
AK3	DBNL
AK3	EWSR1
AK3	ITSN1
AK3	LIMS1
AK3	RAB7B
AK3	SF3A1
AK3	SSBP1
AK3	THUMPD1
AK4	ARF1
AK4	ERI3
AK4	GNPDA1
AK4	MAT2B
AK4	PSMB3
AK4	PTGES3
AK4	RPL12
AK4	RPSA
AK4	UBE3A
AK4	YWHAH
AKAP13	MCCC2
AKAP13	PDIA6
AKAP9	NT5E
AKAP9	STK25
AKAP9	STX4
AKAP9	STXBP2
AKR1A1	BANF1
AKR1A1	COX4NB
AKR1A1	DAP
AKR1A1	HSP90B1
AKR1A1	OLA1
AKR1A1	PDHB
AKR1A1	SEP15
AKR1B1	CCT4
AKR1B1	CCT5
AKR1B1	CIRBP
AKR1B1	DDOST
AKR1B1	GSPT1
AKR1B1	RPL27A
AKR1B1	SRP14
AKR1B1	SUPT5H
AKR1B1	THOP1
AKR1B1	TIPRL
AKR1B1	TUBB
AKR1B1	WDR12
AKR7A2	ARHGDIB
AKR7A2	ARPC1A
AKR7A2	BSG
AKR7A2	COG2
AKR7A2	GMPS
AKR7A2	PPIE
AKR7A2	PPM1G
AKR7A2	RGS10
ALB	C21orf33
ALB	DLGAP4
ALB	ERP44
ALB	HDGF
ALB	HMGB1
ALB	LASP1
ALB	PARK7
ALB	PCK2
ALB	PPM1A
ALB	PPP1R9B
ALB	PYCARD
ALB	SDHB
ALB	STIP1
ALB	UQCRC1
ALB	VCPIP1
ALB	VDAC2
ALCAM	HSPA4
ALCAM	IARS2
ALCAM	RAP2B
ALCAM	STIM1
ALCAM	USP5
ALCAM	VAPA
ALDH1B1	CLTA
ALDH1B1	HNRNPK
ALDH1B1	TPI1
ALDH1L2	APLP2
ALDH1L2	ASAP1
ALDH1L2	ATP6V1B2
ALDH1L2	CAP1
ALDH1L2	COPS2
ALDH1L2	DENND4C
ALDH1L2	FAM49B
ALDH1L2	H6PD
ALDH1L2	HAGH
ALDH1L2	HS2ST1
ALDH1L2	HSPA8
ALDH1L2	IGBP1
ALDH1L2	IRGQ
ALDH1L2	KANK1
ALDH1L2	KLC2
ALDH1L2	MAD1L1
ALDH1L2	MMP14
ALDH1L2	MTCH2
ALDH1L2	OPA1
ALDH1L2	PSMC2
ALDH1L2	RAB1A
ALDH1L2	RAB8B
ALDH1L2	TCERG1
ALDH1L2	UBFD1
ALDH1L2	YWHAB
ALDH1L2	ZCCHC6
ALDH2	ARID1B
ALDH2	MARS
ALDH2	RPA1
ALDH2	SUPT6H
ALDH2	TARDBP
ALDH2	THOC2
ALDH2	ZNF638
ALDH4A1	DLST
ALDH4A1	ERLEC1
ALDH4A1	FUBP1
ALDH4A1	GOLGA4
ALDH4A1	HMGB1
ALDH4A1	HMGB3
ALDH4A1	HNRNPF
ALDH4A1	HSPA2
ALDH4A1	HSPA5
ALDH4A1	HSPA9
ALDH4A1	IDH3A
ALDH4A1	MCTS1
ALDH4A1	NAP1L1
ALDH4A1	PRDX1
ALDH4A1	SCFD1
ALDH4A1	SRSF2
ALDH4A1	TLN2
ALDH4A1	UQCRC1
ALDH4A1	VAPB
ALDH4A1	YTHDF1
ALDH7A1	ATP2A3
ALDH7A1	BRD4
ALDH7A1	CLIP2
ALDH7A1	EIF2S1
ALDH7A1	EIF4E
ALDH7A1	GBAS
ALDH7A1	GORASP2
ALDH7A1	HMBS
ALDH7A1	HRAS
ALDH7A1	IKBIP
ALDH7A1	INTS9
ALDH7A1	LDHB
ALDH7A1	LMNB2
ALDH7A1	LRRC47
ALDH7A1	LSM6
ALDH7A1	MRPL1
ALDH7A1	MRPL39
ALDH7A1	NDUFV3
ALDH7A1	NHLRC2
ALDH7A1	NIT2
ALDH7A1	NPLOC4
ALDH7A1	NUMB
ALDH7A1	NUP153
ALDH7A1	NUP214
ALDH7A1	OTUB1
ALDH7A1	OXCT1
ALDH7A1	PITPNA
ALDH7A1	PPIA
ALDH7A1	RAD23A
ALDH7A1	RBM14
ALDH7A1	RBM5
ALDH7A1	RCOR1
ALDH7A1	RGS1
ALDH7A1	RPL10
ALDH7A1	RPS6KA1
ALDH7A1	SEPT7
ALDH7A1	STK24
ALDH7A1	STX12
ALDH7A1	TAF15
ALDH7A1	TAGLN2
ALDH7A1	UQCRB
ALDH7A1	YTHDF3
ALDH7A1	ZNF281
ALDH9A1	ANXA11
ALDH9A1	ATP5I
ALDH9A1	ATP5O
ALDH9A1	CBL
ALDH9A1	CYCS
ALDH9A1	EIF2S1
ALDH9A1	EIF4E
ALDH9A1	ELAVL1
ALDH9A1	GK
ALDH9A1	GLIPR2
ALDH9A1	GMFG
ALDH9A1	HRAS
ALDH9A1	HSD17B10
ALDH9A1	IDH3G
ALDH9A1	IMPDH1
ALDH9A1	INPPL1
ALDH9A1	KIAA1598
ALDH9A1	LDHB
ALDH9A1	LRRC47
ALDH9A1	LUC7L2
ALDH9A1	MAP2K1
ALDH9A1	MRPL1
ALDH9A1	NDUFV3
ALDH9A1	NHLRC2
ALDH9A1	NUP153
ALDH9A1	OTUB1
ALDH9A1	PFN1
ALDH9A1	PLEKHO2
ALDH9A1	PPIA
ALDH9A1	PSMA7
ALDH9A1	PTBP1
ALDH9A1	RAD23A
ALDH9A1	RBM12
ALDH9A1	RBM14
ALDH9A1	RBM8A
ALDH9A1	RBMS1
ALDH9A1	RHOG
ALDH9A1	SCP2
ALDH9A1	SH3BP1
ALDH9A1	SLC25A13
ALDH9A1	SQRDL
ALDH9A1	SYNRG
ALDH9A1	TMED5
ALDH9A1	TMOD3
ALDH9A1	TSFM
ALDH9A1	UBE2V1
ALDH9A1	UQCRC2
ALDOA	ARFGAP1
ALDOA	ARHGAP15
ALDOA	BMP2K
ALDOA	CDV3
ALDOA	CIAO1
ALDOA	EIF5A2
ALDOA	ENO1
ALDOA	ERP29
ALDOA	G3BP1
ALDOA	GNA13
ALDOA	GRIPAP1
ALDOA	HCLS1
ALDOA	KRAS
ALDOA	LPP
ALDOA	LSM2
ALDOA	MDH2
ALDOA	MYL12A
ALDOA	NAMPT
ALDOA	NAP1L1
ALDOA	NUBP1
ALDOA	PAK2
ALDOA	PPA1
ALDOA	PSMB1
ALDOA	PSMC3
ALDOA	PXN
ALDOA	RBBP6
ALDOA	RCC1
ALDOA	RGS1
ALDOA	RHOC
ALDOA	SNX18
ALDOA	STX12
ALDOA	TCEB1
ALDOA	TNKS1BP1
ALDOA	UBE2J1
ALDOA	VASP
ALDOA	VDAC1
ALDOA	VIM
ALDOA	WDR1
ALDOA	WIBG
ALDOA	YARS
ALDOA	YTHDF1
ALDOC	AP1G1
ALDOC	AP1M1
ALDOC	APEX1
ALDOC	APRT
ALDOC	ARF1
ALDOC	ATP6V1E1
ALDOC	BTF3L4
ALDOC	C1orf123
ALDOC	CALU
ALDOC	CTSA
ALDOC	CYC1
ALDOC	EBNA1BP2
ALDOC	GANAB
ALDOC	GBA
ALDOC	GLMN
ALDOC	HMGA1
ALDOC	HNRNPC
ALDOC	HNRPDL
ALDOC	HSPB1
ALDOC	IGF2BP2
ALDOC	IKBKG
ALDOC	LZIC
ALDOC	ME1
ALDOC	NAP1L4
ALDOC	NPL
ALDOC	NUP93
ALDOC	PDCD6
ALDOC	PPIH
ALDOC	PPP1CA
ALDOC	PPP3R1
ALDOC	PRDX6
ALDOC	PRKCA
ALDOC	PSMA5
ALDOC	PSMD14
ALDOC	PTGES3
ALDOC	RAP1GDS1
ALDOC	RFTN1
ALDOC	RPS15A
ALDOC	RPS27A
ALDOC	SF3A1
ALDOC	SNRPB2
ALDOC	SRP9
ALDOC	SSR3
ALDOC	TFAM
ALDOC	TGFBI
ALDOC	THRAP3
ALDOC	TIMM44
ALDOC	TOR1AIP1
ALDOC	UBE2N
ALDOC	UBE4A
ALDOC	VTA1
ALDOC	WASF2
ALDOC	ZC3H15
AMPD2	AP3D1
AMPD2	ARFGEF1
AMPD2	CD109
AMPD2	CD36
AMPD2	CEBPZ
AMPD2	CSK
AMPD2	CUL4A
AMPD2	DDX18
AMPD2	DOCK2
AMPD2	DYNC1H1
AMPD2	EIF2B3
AMPD2	ERLIN1
AMPD2	ESYT2
AMPD2	FKBP5
AMPD2	GABARAP
AMPD2	GNAI3
AMPD2	ILF2
AMPD2	IPO7
AMPD2	KDM3B
AMPD2	LRRC59
AMPD2	NAA15
AMPD2	PANK4
AMPD2	PFKL
AMPD2	RAB3GAP1
AMPD2	RPL7L1
AMPD2	SCYL1
AMPD2	SUGP2
AMPD2	THOC1
AMPD2	TROVE2
AMPD2	TXNDC9
AMPD3	COX6C
AMPD3	DARS
AMPD3	GIGYF2
AMPD3	MCM6
AMPD3	PUM1
AMPD3	RABGAP1L
AMPD3	RPA1
AMPD3	SMC2
ANKHD1	NOLC1
ANKRD17	CFL2
ANKRD44	CASP1
ANKRD44	PRRC2A
ANKRD44	RPS23
ANO6	AP1G1
ANO6	AP2A1
ANO6	AP2A2
ANO6	APMAP
ANO6	ARHGEF6
ANO6	ARL8B
ANO6	ATP6V0D1
ANO6	BECN1
ANO6	CALU
ANO6	CD109
ANO6	CDK11B
ANO6	CS
ANO6	CYB5R1
ANO6	DDX18
ANO6	DDX39A
ANO6	DNAJC7
ANO6	DSTN
ANO6	EIF3F
ANO6	EIF3G
ANO6	EPB41L2
ANO6	EPB41L3
ANO6	ERO1L
ANO6	ETF1
ANO6	FAM105A
ANO6	GALNT2
ANO6	GGT1
ANO6	GIT2
ANO6	GMPPB
ANO6	HK1
ANO6	HNRNPU
ANO6	HSPB1
ANO6	HTATSF1
ANO6	HTT
ANO6	ITGAL
ANO6	IWS1
ANO6	KIAA0090
ANO6	LIPA
ANO6	MOV10
ANO6	MTHFD1
ANO6	MYBBP1A
ANO6	NAA10
ANO6	NME2
ANO6	NONO
ANO6	NUP210
ANO6	NUP93
ANO6	OAS2
ANO6	PDCD6
ANO6	PDXK
ANO6	PLXNB2
ANO6	PPFIBP1
ANO6	PSMA5
[truncated: 21,709 more rows]
