# Supplementary material for: Context-enriched interactome powered by proteomics helps the identification of novel regulators of macrophage activation
Source: eLife. 2018 Oct 10;7:e37059. doi: 10.7554/eLife.37059 (PMC6179386; doi:10.7554/eLife.37059)
Supplement: Figure 1—source data 3. — Co-abundance network for M(IL-4). [file elife-37059-fig1-data3.csv]

A2M	ANKRD44
A2M	ANXA1
A2M	ARPC1A
A2M	CNDP2
A2M	CNN2
A2M	DCTN4
A2M	DSTN
A2M	FAM21C
A2M	FCGRT
A2M	GBP1
A2M	GGA3
A2M	GSR
A2M	ILK
A2M	LYPLA2
A2M	PPIP5K2
A2M	PPP1R12A
A2M	PPP1R7
A2M	PRKAR1A
A2M	PRKCA
A2M	PROSC
A2M	RNF214
A2M	RSU1
A2M	SMAP2
A2M	SNX1
AAK1	AATF
AAK1	ABI1
AAK1	ACAA1
AAK1	ACAA2
AAK1	ACADM
AAK1	ACADS
AAK1	ACO1
AAK1	ACOT2
AAK1	ALDH1B1
AAK1	ALDH9A1
AAK1	ANXA5
AAK1	ATP5B
AAK1	ATP5O
AAK1	CAMK2D
AAK1	CPT2
AAK1	CTSS
AAK1	DDX23
AAK1	ECH1
AAK1	EPB41L2
AAK1	FCGRT
AAK1	FYB
AAK1	GARS
AAK1	GATM
AAK1	HADH
AAK1	HEXB
AAK1	HNRNPUL2
AAK1	KRT1
AAK1	LIPA
AAK1	MDH1
AAK1	MRPS25
AAK1	MRRF
AAK1	NDUFB10
AAK1	NPL
AAK1	NUTF2
AAK1	PDHB
AAK1	PMPCB
AAK1	PURB
AAK1	QKI
AAK1	RAP1A
AAK1	RAP2B
AAK1	SCP2
AAK1	SCPEP1
AAK1	SEPT9
AAK1	SNX5
AAK1	SNX6
AAK1	STAM2
AAK1	TIMM44
AARS	ACAA2
AARS	ACADM
AARS	ACO1
AARS	ADK
AARS	AK3
AARS	APOC2
AARS	ATP5L
AARS	CAMK2D
AARS	CBS
AARS	CPT2
AARS	CTSS
AARS	DNAJC3
AARS	EPB41L2
AARS	FBP1
AARS	GARS
AARS	GATM
AARS	HADHB
AARS	HIBCH
AARS	HNRNPUL2
AARS	IDH1
AARS	IDH2
AARS	LRP1
AARS	MDH1
AARS	MYEF2
AARS	NPL
AARS	PAK1
AARS	PARN
AARS	PCK2
AARS	PDHB
AARS	PPIC
AARS	PURB
AARS	QPRT
AARS	RTCD1
AARS	SCAF11
AARS	SEPHS1
AARS	SLC25A24
AARS	SMS
AARS	SNX6
AARS	STAM2
AARS	SUCLG2
AARS	SUMF2
AARS	TIMM44
AARS	TOP2A
AARS	TUFM
AARS	WARS
AATF	ACTBL2
AATF	ACTG1
AATF	ATP5B
AATF	IDH3A
AATF	MRPL11
AATF	NDUFV1
AATF	NUTF2
AATF	PITRM1
AATF	RCC1
AATF	SEPT9
AATF	STK4
ABCD3	CCAR1
ABCD3	COPS3
ABCD3	CSTF3
ABCD3	EPHX1
ABCD3	FAM213A
ABCD3	INPP5D
ABCE1	CES1
ABCE1	DHX15
ABCE1	EFTUD2
ABCE1	EHD1
ABCE1	EIF3K
ABCE1	MMP9
ABCE1	NCAPH
ABCE1	NCF1
ABCE1	NFKB2
ABCE1	RCC2
ABCE1	SUN2
ABCE1	THOC1
ABCF1	DNMT1
ABCF1	PDE12
ABCF1	TUBA1C
ABCF2	ADAM17
ABCF2	ATP1A1
ABCF2	CTNND1
ABCF2	HSPH1
ABCF2	MMP14
ABCF2	OGT
ABCF2	PANX1
ABCF2	TRIM2
ABCF2	UBE2J1
ABHD10	ACADS
ABHD10	ADAM10
ABHD10	ATP5A1
ABHD10	CCBL2
ABHD10	DDX23
ABHD10	DNM2
ABHD10	DYNLT1
ABHD10	HADH
ABHD10	HEXA
ABHD10	HMGCL
ABHD10	HSDL2
ABHD10	NIPSNAP1
ABHD10	SCAF11
ABHD10	TLE3
ABHD10	VDAC2
ABHD12	C9orf46
ABHD12	DPP3
ABHD12	VPS11
ABHD12	YTHDF1
ABI1	GSR
ABI1	GSTK1
ABI1	MRPL11
ABI1	MRRF
ABI1	NUTF2
ABI1	PRKCA
ABI1	RAP1A
ABI1	SCP2
ABI1	SEPT9
ABI1	STK24
ABI1	UAP1L1
ABR	ADAP1
ABR	AP3M1
ABR	CTPS2
ABR	DDX17
ABR	PSMC2
ABR	RALA
ABR	RPS6KA3
ACAA1	ACAA2
ACAA1	ACADM
ACAA1	ADK
ACAA1	APOC2
ACAA1	APOOL
ACAA1	C21orf33
ACAA1	CASP1
ACAA1	CDK5
ACAA1	CNDP2
ACAA1	CTSB
ACAA1	DBNL
ACAA1	DCTN4
ACAA1	ECHS1
ACAA1	EHD4
ACAA1	EPS15
ACAA1	EPS15L1
ACAA1	EVL
ACAA1	FBP1
ACAA1	FCGRT
ACAA1	FIS1
ACAA1	GGA3
ACAA1	GSR
ACAA1	GSTK1
ACAA1	GSTO1
ACAA1	HADHB
ACAA1	KLC1
ACAA1	LRP1
ACAA1	LRRC47
ACAA1	MDH1
ACAA1	NCF4
ACAA1	NDUFA8
ACAA1	NOP58
ACAA1	PARN
ACAA1	PKN1
ACAA1	PMPCB
ACAA1	PPIB
ACAA1	PPIC
ACAA1	PRKAR1A
ACAA1	PROSC
ACAA1	PSMC6
ACAA1	SMS
ACAA1	SNX6
ACAA1	TOR1AIP2
ACAA1	TUFM
ACAA2	ACADM
ACAA2	ACO2
ACAA2	ADK
ACAA2	AGK
ACAA2	AKR1A1
ACAA2	ALDH1B1
ACAA2	ALDH9A1
ACAA2	APOOL
ACAA2	BLVRB
ACAA2	CAMK2D
ACAA2	CNDP2
ACAA2	CNN2
ACAA2	COTL1
ACAA2	CPT2
ACAA2	CTSB
ACAA2	CTSS
ACAA2	ECHS1
ACAA2	EHD4
ACAA2	EPB41L2
ACAA2	EVL
ACAA2	FBP1
ACAA2	FCGRT
ACAA2	GATM
ACAA2	GSTK1
ACAA2	HADHB
ACAA2	IDH1
ACAA2	IDH2
ACAA2	KLC1
ACAA2	LIPA
ACAA2	LRP1
ACAA2	LRRC47
ACAA2	LYPLA2
ACAA2	MDH1
ACAA2	MRPL44
ACAA2	NDUFS1
ACAA2	NOP58
ACAA2	PARN
ACAA2	PCK2
ACAA2	PKN1
ACAA2	PMPCB
ACAA2	PPIB
ACAA2	PRKAR1A
ACAA2	PRKAR2A
ACAA2	PSMC4
ACAA2	PTGES2
ACAA2	QPRT
ACAA2	RAP1A
ACAA2	RSU1
ACAA2	SNX6
ACAA2	TIMM44
ACAA2	TOP2A
ACAA2	YARS
ACAD9	ADAR
ACAD9	BRE
ACAD9	CISD2
ACAD9	CLTC
ACAD9	DOCK2
ACAD9	FLII
ACAD9	GLG1
ACAD9	KPNB1
ACAD9	NAA35
ACAD9	NCKAP1L
ACAD9	PI4KA
ACAD9	RALB
ACAD9	SLC25A6
ACAD9	U2SURP
ACADM	AGK
ACADM	AK3
ACADM	ALDH1B1
ACADM	ALDH9A1
ACADM	ATP5B
ACADM	CAMK2D
ACADM	CNDP2
ACADM	CORO1C
ACADM	CTSB
ACADM	CTSS
ACADM	DBT
ACADM	ECHS1
ACADM	EPB41L2
ACADM	FBP1
ACADM	FCGRT
ACADM	GATM
ACADM	GSR
ACADM	GSTK1
ACADM	HADHB
ACADM	IDH1
ACADM	ILK
ACADM	ITSN1
ACADM	LRP1
ACADM	LRRC47
ACADM	MDH1
ACADM	MRPL44
ACADM	MRRF
ACADM	NDUFB10
ACADM	NDUFS1
ACADM	NISCH
ACADM	NUTF2
ACADM	PARN
ACADM	PCK2
ACADM	PPIB
ACADM	PRKAR1A
ACADM	PROSC
ACADM	QPRT
ACADM	RAP1A
ACADM	RP2
ACADM	RSU1
ACADM	SEPHS1
ACADM	SUCLG2
ACADM	TOP2A
ACADM	TUFM
ACADS	ACO1
ACADS	AIFM1
ACADS	AK3
ACADS	ALDH4A1
ACADS	ALDH7A1
ACADS	ATP5B
ACADS	DDX23
ACADS	DNM2
ACADS	ECH1
ACADS	FYB
ACADS	GATM
ACADS	HADH
ACADS	HADHB
ACADS	HEXB
ACADS	HIBCH
ACADS	HSDL2
ACADS	MCCC2
ACADS	NDUFB10
ACADS	NUTF2
ACADS	PAK1
ACADS	PDHB
ACADS	PSMC3
ACADS	SCAF11
ACADS	SEPHS1
ACADS	STAM2
ACADS	STK24
ACADS	UGP2
ACADS	VDAC2
ACADVL	ACTR2
ACADVL	ATP5F1
ACADVL	KIF2A
ACADVL	MTCH2
ACADVL	NAA16
ACADVL	NARS
ACADVL	RAB5B
ACADVL	RHOG
ACADVL	SAR1A
ACADVL	SLC25A5
ACADVL	TLN2
ACAP2	RDX
ACAP2	UBA2
ACAT1	ACOT9
ACAT1	ALDH1L2
ACAT1	ANXA5
ACAT1	AP2A2
ACAT1	ASS1
ACAT1	CARS
ACAT1	CBS
ACAT1	CPT2
ACAT1	CTSA
ACAT1	GPNMB
ACAT1	HADH
ACAT1	HARS2
ACAT1	HEXB
ACAT1	HNRNPL
ACAT1	IDH3B
ACAT1	IMMT
ACAT1	KRT1
ACAT1	MUT
ACAT1	OAT
ACAT1	PARS2
ACAT1	PDHB
ACAT1	PHB
ACAT1	PHGDH
ACAT1	PI4K2A
ACAT1	PLIN2
ACAT1	PLOD1
ACAT1	PURB
ACAT1	SCPEP1
ACAT1	SEPHS1
ACAT1	SLC25A24
ACAT1	SNX18
ACAT1	SUMF2
ACAT2	ATXN2
ACAT2	BCAT1
ACAT2	BLMH
ACAT2	CEP170
ACAT2	CTSL1
ACAT2	CUTA
ACAT2	DAB2
ACAT2	DDX24
ACAT2	FAH
ACAT2	GAPDH
ACAT2	GART
ACAT2	GCC2
ACAT2	HMGCS1
ACAT2	HSPH1
ACAT2	IMPAD1
ACAT2	NENF
ACAT2	NME2
ACAT2	PDXDC1
ACAT2	RPL7L1
ACAT2	SYAP1
ACAT2	SYNJ2
ACAT2	TXN
ACBD3	ARFGAP1
ACBD3	ARFIP1
ACBD3	ARHGDIB
ACBD3	OXR1
ACBD3	PDCD5
ACBD3	RAD23B
ACBD3	RBM14
ACBD3	SDF4
ACBD3	YWHAB
ACBD3	YWHAQ
ACLY	AP2B1
ACLY	OXSR1
ACLY	SMC1A
ACLY	SUGP1
ACO1	ACO2
ACO1	AGK
ACO1	AK3
ACO1	ALDH1B1
ACO1	ALDH7A1
ACO1	APOC2
ACO1	ATP5A1
ACO1	ATP5L
ACO1	CASP1
ACO1	ECHS1
ACO1	EPB41L2
ACO1	GARS
ACO1	GATM
ACO1	HNRNPUL2
ACO1	IDH2
ACO1	LACTB
ACO1	NPL
ACO1	NSUN2
ACO1	NUTF2
ACO1	PAK1
ACO1	PCK2
ACO1	PDHB
ACO1	PMPCB
ACO1	PPIB
ACO1	PSAT1
ACO1	RAP2B
ACO1	RTCD1
ACO1	SCAF11
ACO1	SEPHS1
ACO1	SQRDL
ACO1	SUCLG2
ACO1	SUMF2
ACO1	TOP2A
ACO1	TSFM
ACO1	UGP2
ACO1	WARS
ACO2	ADK
ACO2	AGK
ACO2	AK3
ACO2	AKR1A1
ACO2	ALDH1B1
ACO2	APOC2
ACO2	ATP5L
ACO2	BECN1
ACO2	CAMK2D
ACO2	CPT2
ACO2	DNAJC3
ACO2	ECHS1
ACO2	EPB41L2
ACO2	EPN1
ACO2	FBP1
ACO2	GARS
ACO2	GATM
ACO2	GLB1
ACO2	GSTK1
ACO2	HADHB
ACO2	HEXB
ACO2	HNRNPUL2
ACO2	HSDL2
ACO2	IDH1
ACO2	IDH2
ACO2	LACTB
ACO2	MCCC2
ACO2	MDH1
ACO2	NDUFA8
ACO2	NDUFS1
ACO2	NIPSNAP1
ACO2	NPL
ACO2	NSUN2
ACO2	PARN
ACO2	PDHB
ACO2	PLOD1
ACO2	PMPCB
ACO2	PSMC4
ACO2	PURB
ACO2	QPRT
ACO2	RAP1A
ACO2	RTCD1
ACO2	SCPEP1
ACO2	STAM2
ACO2	SUMF2
ACO2	TAF15
ACO2	TOP2A
ACO2	YARS
ACOT2	ALDH1B1
ACOT2	ALDH9A1
ACOT2	ANXA5
ACOT2	AP1B1
ACOT2	ATP5B
ACOT2	ATP5O
ACOT2	CAMK2D
ACOT2	CPT2
ACOT2	CTSA
ACOT2	DBT
ACOT2	DDX23
ACOT2	DNM2
ACOT2	EPB41L2
ACOT2	ETFA
ACOT2	GATM
ACOT2	GSTM4
ACOT2	HEXB
ACOT2	HIBCH
ACOT2	HMGCL
ACOT2	HSDL2
ACOT2	ITSN1
ACOT2	KRT1
ACOT2	NDUFB10
ACOT2	NUTF2
ACOT2	PAK1
ACOT2	PDP1
ACOT2	PITRM1
ACOT2	PLOD1
ACOT2	PSMC4
ACOT2	PURB
ACOT2	RAP1A
ACOT2	RP2
ACOT2	SCP2
ACOT2	SEPT9
ACOT2	SLC25A24
ACOT2	SNX1
ACOT2	SNX5
ACOT2	STAM2
ACOT2	STK24
ACOT2	TLE3
ACOT2	TOP2A
ACOT2	WASF2
ACOT7	ACTL6A
ACOT7	API5
ACOT7	C3
ACOT7	COPG2
ACOT7	EHD1
ACOT7	RCC2
ACOT7	RGS1
ACOT7	RTF1
ACOT7	STAT1
ACOT7	STK38L
ACOT7	TDP1
ACOT7	TLR2
ACOT7	USP8
ACOT7	ZMYND8
ACOT9	ALDH1L2
ACOT9	ALDH4A1
ACOT9	ASS1
ACOT9	CTSA
ACOT9	CYBB
ACOT9	ERI3
ACOT9	GCLC
ACOT9	GLUD1
ACOT9	GSTM4
ACOT9	HNRPLL
ACOT9	IARS2
ACOT9	ITPR2
ACOT9	KRT1
ACOT9	MUT
ACOT9	OAT
ACOT9	PARS2
ACOT9	PDHA1
ACOT9	PI4K2A
ACOT9	SAMHD1
ACOT9	SCAF11
ACOT9	YTHDF1
ACSL1	KYNU
ACSL1	SRRT
ACSL3	BLVRA
ACSL3	C6orf115
ACSL3	HDLBP
ACSL3	ITGAX
ACSL3	KIF5B
ACSL3	MYO6
ACSL3	PARVA
ACSL3	STK25
ACSL4	ARHGEF2
ACSL4	ASCC3
ACSL4	ATP1A1
ACSL4	ATP2B1
ACSL4	CAD
ACSL4	CCDC88A
ACSL4	COPA
ACSL4	CUL1
ACSL4	DHX36
ACSL4	DOCK10.2
ACSL4	EIF3C
ACSL4	EIF3H
ACSL4	FASN
ACSL4	GOLGB1
ACSL4	IPO7
ACSL4	LRRC59
ACSL4	MYO1F
ACSL4	NAA15
ACSL4	OGT
ACSL4	PPP3CA
ACSL4	SMARCA5
ACSL4	SYNRG
ACSL4	TAP2
ACSL4	TFB2M
ACSL4	UBTF
ACSL4	ZCCHC6
ACSL5	ANKHD1
ACSL5	API5
ACSL5	C3
ACSL5	CES1
ACSL5	COPG2
ACSL5	EHD1
ACSL5	FAM114A2
ACSL5	GEMIN5
ACSL5	HK2
ACSL5	HSPA4L
ACSL5	KANK1
ACSL5	RCC2
ACSL5	RGS1
ACSL5	RTF1
ACSL5	STK38L
ACSL5	TDP1
ACSL5	TIPRL
ACSL5	XRCC1
ACSS2	GTF2I
ACSS2	MSH2
ACSS2	PDS5B
ACSS2	SYK
ACSS2	TPP2
ACTBL2	CHCHD3
ACTBL2	SDSL
ACTG1	ATP5O
ACTG1	GGA1
ACTG1	MRPL11
ACTG1	PC
ACTG1	PITRM1
ACTG1	PSMC4
ACTG1	RP2
ACTG1	SAMHD1
ACTG1	SEPT9
ACTG1	SNX5
ACTG1	VCPIP1
ACTG1	XPNPEP1
ACTL6A	API5
ACTL6A	COG5
ACTL6A	ERLIN1
ACTL6A	GNA12
ACTL6A	ITPR1
ACTL6A	NPC1
ACTL6A	POLR1A
ACTL6A	PPP6C
ACTL6A	PUF60
ACTL6A	REPS1
ACTL6A	STAT1
ACTL6A	UGGT1
ACTL6A	USP8
ACTN1	PDLIM7
ACTN1	SLTM
ACTN4	KHDRBS1
ACTN4	PRDX5
ACTN4	RPS4X
ACTR1A	BRD3
ACTR1A	DYNLT1
ACTR1A	IARS2
ACTR1A	MUT
ACTR1A	OAT
ACTR1A	USP14
ACTR1A	VPS28
ACTR1B	CUL5
ACTR1B	CYTH4
ACTR1B	KIAA0090
ACTR1B	RAD50
ACTR1B	RPN1
ACTR1B	SEC24C
ACTR1B	SKIV2L2
ACTR1B	SMEK1
ACTR1B	SON
ACTR1B	UMPS
ACTR2	ATP5F1
ACTR2	NARS
ACTR2	PSMB1
ACTR2	RHOG
ACTR2	RUFY1
ACTR2	SCYL1
ACTR3	BECN1
ACTR3	GBP2
ACTR3	HLA-A
ACTR3	HNRNPD
ACTR3	ILK
ACTR3	PARVA
ACTR3	PPCS
ACTR3	PRKAA1
ACTR3	UBE2N
ACTR3	UGDH
ACY1	HAGH
ACY1	HIST1H2AB
ACY1	HIST2H2AB
ACY1	IKBKG
ACY1	PCBP1
ACY1	PPP2R5C
ACY1	RARS
ACY1	TPD52L2
ADAM10	ALDH1L2
ADAM10	ALDH4A1
ADAM10	ALDH7A1
ADAM10	ATP5A1
ADAM10	ATP5O
ADAM10	CCBL2
ADAM10	CDK5RAP3
ADAM10	DDX23
ADAM10	DYNLT1
ADAM10	ECH1
ADAM10	ERP29
ADAM10	HADH
ADAM10	HEXA
ADAM10	HMGCL
ADAM10	HNRNPL
ADAM10	HSDL2
ADAM10	KRT1
ADAM10	LMNB2
ADAM10	NHP2L1
ADAM10	NUP37
ADAM10	NUTF2
ADAM10	OAT
ADAM10	PDHB
ADAM10	PDHX
ADAM10	PDPR
ADAM10	PLIN2
ADAM10	PURA
ADAM10	RAP2B
ADAM10	SCPEP1
ADAM10	TLE3
ADAM17	ATP1A1
ADAM17	CTNND1
ADAM17	FMNL2
ADAM17	ICAM1
ADAM17	LYN
ADAM17	NAT10
ADAM17	PECAM1
ADAM17	PLEC
ADAM17	SLC4A7
ADAM17	TGOLN2
ADAM17	UBE2J1
ADAM9	ARHGEF1
ADAM9	CUL4A
ADAM9	FNDC3A
ADAM9	PSMD6
ADAM9	SLC25A6
ADAM9	TMED5
ADAP1	AIMP2
ADAP1	AP3M1
ADAP1	BRD3
ADAP1	GNG5
ADAP1	HMGN2
ADAP1	TARS
ADAP1	VPS28
ADAR	CAND1
ADAR	DOCK2
ADAR	HUWE1
ADAR	NAA35
ADAR	PFKL
ADAR	PI4KA
ADH5	IL4I1
ADH5	TCERG1
ADH5	UQCRFS1
ADK	AGK
ADK	AMPD2
ADK	APOC2
ADK	APOOL
ADK	ATP5L
ADK	ATP6V1E1
ADK	CBR1
ADK	CTSC
ADK	ECHS1
ADK	EPN1
ADK	EPS15
ADK	FBP1
ADK	FH
ADK	FIS1
ADK	GLUL
ADK	GSTO1
ADK	HIBADH
ADK	HNRNPUL2
ADK	KIF13B
ADK	LRP1
ADK	LRRC47
ADK	MCCC2
ADK	MRPL44
ADK	NDUFA8
ADK	NOP58
ADK	NSUN2
ADK	PARN
ADK	PMPCB
ADK	PPIC
ADK	PSMC6
ADK	QKI
ADK	RTCD1
ADK	SUMF2
ADK	TAF15
ADK	TUFM
ADK	WARS
ADK	YARS
ADK	YY1
ADNP	CYCS
ADNP	DNAJC8
ADNP	EIF3F
ADNP	LSM2
ADNP	SERPINC1
ADPGK	ARCN1
ADPGK	ASL
ADPGK	ATG7
ADPGK	CDC42
ADPGK	SEL1L
ADPGK	VAC14
ADRBK1	AP2B1
ADRBK1	CLASP1
ADRBK1	RUVBL2
ADRBK1	SCCPDH
ADRBK1	SMC3
ADRM1	CD2AP
ADRM1	CTSC
ADRM1	DNAJB1
ADRM1	EEF1A1
ADRM1	GLT25D1
ADRM1	GLUL
ADRM1	GNB2L1
ADRM1	NDUFA8
ADRM1	OLA1
ADRM1	OSTF1
ADRM1	PITPNA
ADRM1	PLIN3
ADRM1	RPE
ADRM1	SNTB1
ADRM1	TCEA1
ADRM1	VPS4B
ADRM1	WBP2
ADSL	ATP6V1C1
ADSL	COPB1
ADSL	COPS3
ADSL	CSTF3
ADSL	CUL4A
ADSL	INPP5D
ADSL	KIAA0090
ADSL	KPNB1
ADSL	NBAS
ADSL	PFKL
ADSL	PI4KA
ADSL	UBR4
ADSS	FRG1
AFG3L2	ATM
AFG3L2	COL4A3BP
AFG3L2	ERAP1
AFG3L2	HNRNPH1
AFG3L2	NAA16
AFG3L2	PTPRC
AFG3L2	RNH1
AFG3L2	STX4
AFG3L2	TAOK3
AFP	AIF1
AFP	ALB
AFP	CACYBP
AFP	EIF4E
AFP	P4HB
AFP	PNP
AFP	SF3A1
AFP	SRSF1
AFP	SRSF2
AFP	VTA1
AFP	YWHAZ
AFTPH	FAM98B
AFTPH	ZC3HAV1
AGK	APOOL
AGK	ASAH1
AGK	ATP5L
AGK	CAB39
AGK	CASP1
AGK	COTL1
AGK	EPN1
AGK	FBP1
AGK	FH
AGK	FIS1
AGK	GATM
AGK	GSTK1
AGK	HNRNPUL2
AGK	IDH1
AGK	LRP1
AGK	LRRC47
AGK	MRPL44
AGK	NDUFA8
AGK	NPL
AGK	NSUN2
AGK	PCK2
AGK	PDCD6
AGK	PDHB
AGK	PMPCB
AGK	PPIC
AGK	PSMC6
AGK	QKI
AGK	RTCD1
AGK	SUMF2
AGK	TOP2A
AGK	WARS
AGK	YARS
AGL	COL4A3BP
AGL	DDX19B
AGL	DPP3
AGL	EPRS
AGL	HNRNPH2
AGL	PCF11
AGL	PTPRC
AGPS	COG3
AGPS	DARS2
AGPS	ERAP1
AGPS	PANK4
AGPS	PPP2R5D
AGPS	RNH1
AGPS	RNMT
AGPS	TAOK3
AGPS	UBA6
AGPS	VPS11
AHCTF1	ARFGEF2
AHCTF1	CNOT10
AHCTF1	COMT
AHCTF1	COPB2
AHCTF1	CTSH
AHCTF1	DHX29
AHCTF1	DHX30
AHCTF1	ERGIC3
AHCTF1	GOLGA5
AHCTF1	IPO7
AHCTF1	NKRF
AHCTF1	OGT
AHCTF1	RANBP2
AHCTF1	SKP1
AHCTF1	SYNJ2
AHCTF1	TEX2
AHCTF1	TRIM2
AHCTF1	USP10
AHCTF1	VPRBP
AHCTF1	ZCCHC6
AHCY	APOA1BP
AHCY	ARGLU1
AHCY	CAPZA2
AHCY	EEF1A2
AHCY	IK
AHCY	LARS2
AHCY	MRPL15
AHCY	RPL12
AHCY	SDCBP
AHCY	SEPT2
AHCYL1	AP3M1
AHCYL1	CTSD
AHCYL1	ERI3
AHCYL1	INPPL1
AHCYL1	RPS6KA3
AHCYL1	TARS
AHNAK	CXorf26
AHNAK	LASP1
AHSA1	HMBS
AHSA1	SRSF1
AHSA1	TBL1XR1
AHSA1	USP4
AHSA1	VTA1
AHSG	SF3A1
AIF1	CHORDC1
AIF1	FEN1
AIF1	H1FX
AIF1	HMGB2
AIF1	HNRNPF
AIF1	HNRNPUL1
AIF1	MRPL9
AIF1	SCARB2
AIF1	SNRNP70
AIF1	TXNDC12
AIFM1	FSCN1
AIFM1	MVP
AIFM1	NDUFB10
AIFM1	NUTF2
AIFM1	POTEI
AIFM1	PSMC3
AIFM1	STK24
AIFM1	UGP2
AIFM1	VDAC1
AIMP1	GBA
AIMP1	HNRNPA1
AIMP1	HNRNPAB
AIMP1	KRAS
AIMP1	MRPL9
AIMP1	PAFAH1B1
AIMP1	PPP1R9B
AIMP1	RPL11
AIMP1	RPL22L1
AIMP1	TXNL1
AIMP1	WBP11
AIMP2	CTNNBL1
AIMP2	SND1
AIMP2	TSNAX
AIMP2	USP7
AIP	EIF2S2
AIP	GPX1
AIP	IMPA1
AIP	POTEF
AIP	SEC31A
AIP	UQCRC1
AK1	ARHGAP4
AK1	C21orf33
AK1	CMPK1
AK1	FUBP3
AK1	MVP
AK1	NDUFB10
AK1	PDAP1
AK1	PGK1
AK1	QKI
AK1	WDR1
AK1	ZNF207
AK2	DCTD
AK2	GLT25D1
AK2	KIAA1967
AK2	MAGOH
AK2	OLA1
AK2	PGK2
AK2	PSME2
AK2	SDHB
AK2	SNRPA1
AK2	WBP2
AK3	ALDH9A1
AK3	ATP5B
AK3	ATP5L
AK3	CAMK2D
AK3	CARS
AK3	CPT2
AK3	ECH1
AK3	ECHS1
AK3	EPB41L2
AK3	GATM
AK3	GSR
AK3	HADHB
AK3	HEXA
AK3	HEXB
AK3	HIBCH
AK3	IDH1
AK3	IDH2
AK3	KRT1
AK3	LIPA
AK3	MRPL44
AK3	NECAP2
AK3	NIPSNAP1
AK3	NPL
AK3	PAK1
AK3	PDHB
AK3	PMPCB
AK3	PPIB
AK3	PPIC
AK3	PSMC4
AK3	PURB
AK3	RAP1A
AK3	RAP2B
AK3	SCAF11
AK3	SCPEP1
AK3	SEPHS1
AK3	SLC25A24
AK3	STAM2
AK3	SUCLG2
AK3	TOP2A
AK3	VCPIP1
AK3	VDAC2
AK4	ASNA1
AKAP13	CAPRIN1
AKAP13	SASH1
AKAP9	ANKRD17
AKAP9	AUP1
AKAP9	COPA
AKAP9	DAB2
AKAP9	EIF5
AKAP9	ERGIC3
AKAP9	FAM49B
AKAP9	NENF
AKAP9	NKRF
AKAP9	NOLC1
AKAP9	NUP153
AKAP9	PPIL3
AKAP9	RABGAP1
AKAP9	SKP1
AKAP9	TXN
AKAP9	USP10
AKR1A1	ALDH1B1
AKR1A1	CAMK2D
AKR1A1	CPT2
AKR1A1	CTSB
AKR1A1	ECHS1
AKR1A1	EPB41L2
AKR1A1	FAM21C
AKR1A1	FCGRT
AKR1A1	GARS
AKR1A1	GATM
AKR1A1	GGA3
AKR1A1	GSTK1
AKR1A1	HADHB
AKR1A1	HIBCH
AKR1A1	HNRNPUL2
AKR1A1	IDH1
AKR1A1	IDH2
AKR1A1	LIPA
AKR1A1	LRP1
AKR1A1	LRRC47
AKR1A1	MDH1
AKR1A1	MRPL44
AKR1A1	MRRF
AKR1A1	NDUFB10
AKR1A1	PAK1
AKR1A1	PARN
AKR1A1	PDHB
AKR1A1	PKN1
AKR1A1	PLOD1
AKR1A1	PMPCB
AKR1A1	PPIB
AKR1A1	PPIC
AKR1A1	PROSC
AKR1A1	PURB
AKR1A1	QKI
AKR1A1	QPRT
AKR1A1	RAP1A
AKR1A1	RSU1
AKR1A1	RTCD1
AKR1A1	SCAF11
AKR1A1	SCP2
AKR1A1	SNX5
AKR1A1	SNX6
AKR1A1	STAM2
AKR1A1	SUCLG2
AKR1A1	TIMM44
AKR1A1	TOP2A
AKR1A1	TOR1AIP2
AKR1A1	TUFM
AKR1A1	YARS
AKR1B1	POTEI
AKR1B1	PSMA3
AKR1B1	PSME2
AKR1B1	RPL38
AKR1B1	SEPT7
AKR1B1	SEPT8
AKR1B1	THYN1
AKR1B1	TUBB3
AKR1B1	VDAC1
AKR7A2	ARHGAP17
AKR7A2	BTF3L4
AKR7A2	CRKL
AKR7A2	DNAJC2
AKR7A2	FUBP1
AKR7A2	G3BP1
AKR7A2	LGALS3
AKR7A2	LRPAP1
AKR7A2	LRRFIP1
AKR7A2	PPM1A
AKR7A2	RPS15A
AKR7A2	SERBP1
AKR7A2	SRSF9
AKR7A2	UFM1
AKR7A2	ZC3H15
ALB	C14orf166
ALB	EIF4E
ALB	EWSR1
ALB	P4HB
ALB	PAFAH1B1
ALB	PDXK
ALB	SF3A1
ALB	SRSF1
ALB	VTA1
ALCAM	CALR
ALCAM	CAPRIN1
ALCAM	DLGAP4
ALCAM	P4HA1
ALCAM	PSAP
ALDH1B1	BLVRB
ALDH1B1	CAMK2D
ALDH1B1	CNN2
ALDH1B1	CTSB
ALDH1B1	DBT
ALDH1B1	DCTN4
ALDH1B1	DNAJC3
ALDH1B1	ECHS1
ALDH1B1	EHD4
ALDH1B1	EPB41L2
ALDH1B1	ETFA
ALDH1B1	FAM21C
ALDH1B1	FCGRT
ALDH1B1	FIS1
ALDH1B1	GARS
ALDH1B1	GATM
ALDH1B1	GSR
ALDH1B1	HADHB
ALDH1B1	HIBCH
ALDH1B1	IDH1
ALDH1B1	LIPA
ALDH1B1	LRP1
ALDH1B1	LRRC47
ALDH1B1	MRPS25
ALDH1B1	NPL
ALDH1B1	PAK1
ALDH1B1	PARN
ALDH1B1	PDHB
ALDH1B1	PKN1
ALDH1B1	PMPCB
ALDH1B1	PPCS
ALDH1B1	PROSC
ALDH1B1	PURB
ALDH1B1	QPRT
ALDH1B1	RAP1A
ALDH1B1	RAP2B
ALDH1B1	RSU1
ALDH1B1	SAMHD1
ALDH1B1	SCPEP1
ALDH1B1	SMAP2
ALDH1B1	SNX6
ALDH1B1	STAM2
ALDH1B1	SUCLG2
ALDH1B1	SUMF2
ALDH1B1	TIMM44
ALDH1B1	TOP2A
ALDH1B1	YARS
ALDH1L2	ANXA4
ALDH1L2	AP2A2
ALDH1L2	ASS1
ALDH1L2	CBS
ALDH1L2	CCBL2
ALDH1L2	CTSA
ALDH1L2	DNM2
ALDH1L2	ERI3
ALDH1L2	GLUD1
ALDH1L2	GPNMB
ALDH1L2	GSTM4
ALDH1L2	HEXB
ALDH1L2	HSDL2
ALDH1L2	IARS2
ALDH1L2	IVD
ALDH1L2	KRT1
ALDH1L2	MRPS25
ALDH1L2	MUT
ALDH1L2	NHP2L1
ALDH1L2	OAT
ALDH1L2	PDHA1
ALDH1L2	PDPR
ALDH1L2	PHGDH
ALDH1L2	PI4K2A
ALDH1L2	PLOD1
ALDH1L2	SAMHD1
ALDH1L2	SCAF11
ALDH1L2	SCPEP1
ALDH1L2	USP14
ALDH1L2	WNK1
ALDH2	ANXA6
ALDH2	BRD4
ALDH2	HCK
ALDH2	PSMD13
ALDH2	STRBP
ALDH4A1	ANXA5
ALDH4A1	AP1B1
ALDH4A1	ASS1
ALDH4A1	ATP5B
ALDH4A1	ATP5O
ALDH4A1	CBS
ALDH4A1	DDX23
ALDH4A1	DNM2
ALDH4A1	DYNLT1
ALDH4A1	ECH1
ALDH4A1	GSTM4
ALDH4A1	HEXB
ALDH4A1	HMGCL
ALDH4A1	IMMT
ALDH4A1	KRT1
ALDH4A1	MUT
ALDH4A1	PDPR
ALDH4A1	PHGDH
ALDH4A1	PLIN2
ALDH4A1	PLOD1
ALDH4A1	SCAF11
ALDH4A1	SEPHS1
ALDH4A1	SNX2
ALDH4A1	TLE3
ALDH4A1	VDAC2
ALDH7A1	ARPC2
ALDH7A1	ATP5A1
ALDH7A1	ATP5L
ALDH7A1	COASY
ALDH7A1	DDX23
ALDH7A1	ERP29
ALDH7A1	FAM82B
ALDH7A1	GARS
ALDH7A1	GLB1
ALDH7A1	HEXA
ALDH7A1	HSDL2
ALDH7A1	IDH2
ALDH7A1	LACTB
ALDH7A1	MCCC2
ALDH7A1	NDUFB10
ALDH7A1	NIPSNAP1
ALDH7A1	NPL
ALDH7A1	NUP37
ALDH7A1	NUTF2
ALDH7A1	PSAT1
ALDH7A1	RAP2B
ALDH7A1	RTCD1
ALDH7A1	SEPHS1
ALDH7A1	SQRDL
ALDH7A1	UAP1L1
ALDH7A1	VDAC2
ALDH9A1	ANXA5
ALDH9A1	BECN1
ALDH9A1	BLVRB
ALDH9A1	ETFA
ALDH9A1	FAM21C
ALDH9A1	GGA1
ALDH9A1	GLUD1
ALDH9A1	HK1
ALDH9A1	IDH3A
ALDH9A1	IDH3B
ALDH9A1	IMMT
ALDH9A1	IVD
ALDH9A1	MRPS25
ALDH9A1	PC
ALDH9A1	PLOD1
ALDH9A1	PROSC
ALDH9A1	PSMC4
ALDH9A1	PTGES2
ALDH9A1	RAP1A
ALDH9A1	RP2
ALDH9A1	SCAF11
ALDH9A1	SMAP2
ALDH9A1	SNX1
ALDH9A1	SNX5
ALDH9A1	SRGAP2
ALDH9A1	VCPIP1
ALDH9A1	WASF2
ALDOA	ATP1B1
ALDOA	CAMK1
ALDOA	CARD9
ALDOA	DECR1
ALDOA	EEF1D
ALDOA	H2AFX
ALDOA	PARK7
ALDOA	SH3KBP1
ALDOA	UBE2M
ALDOA	VCP
ALDOA	VPS4A
ALDOC	CLIC4
ALDOC	CPNE1
ALDOC	EEF1A1
ALDOC	FBL
ALDOC	GLOD4
ALDOC	GNB2L1
ALDOC	GSS
ALDOC	HDGF
ALDOC	LGALS3
ALDOC	NAGA
ALDOC	NDRG2
ALDOC	NUDT21
ALDOC	PPM1A
ALDOC	PPP1R9B
ALDOC	PSMD14
ALDOC	PSMD7
ALDOC	RPSA
ALDOC	SAFB
ALDOC	SNRPD2
ALDOC	UBE2I
ALDOC	ZCCHC8
AMPD2	APOC2
AMPD2	APOOL
AMPD2	ATP5L
AMPD2	CAB39
AMPD2	CASP1
AMPD2	CASP3
AMPD2	EPS15L1
AMPD2	FIS1
AMPD2	HIBADH
AMPD2	MRPL44
AMPD2	MYEF2
AMPD2	PCK2
AMPD2	RTCD1
AMPD2	TFAM
AMPD2	YARS
AMPD3	CTR9
AMPD3	DHX9
AMPD3	FDPS
AMPD3	FHOD1
AMPD3	METAP2
AMPD3	MYH10
AMPD3	NBAS
AMPD3	NPC1
AMPD3	NR3C1
AMPD3	PPP6C
AMPD3	PRMT1
AMPD3	RABGAP1L
AMPD3	RLF
AMPD3	SAMD9
AMPD3	SKIV2L2
AMPD3	TRIP12
AMPD3	VAV3
ANKHD1	API5
ANKHD1	ATP6V1H
ANKHD1	BAT3
ANKHD1	C3
ANKHD1	CES1
ANKHD1	COPG2
ANKHD1	CTSL1
ANKHD1	CUTA
ANKHD1	DHX29
ANKHD1	EIF2B4
ANKHD1	FKBP5
ANKHD1	GAPDH
ANKHD1	GLYR1
ANKHD1	HS2ST1
ANKHD1	HSPA4L
ANKHD1	NOLC1
ANKHD1	POLR1A
ANKHD1	RGS1
ANKHD1	RTF1
ANKHD1	STK38L
ANKHD1	TDP1
ANKHD1	TIPRL
ANKHD1	USP10
ANKHD1	XRCC1
ANKRD17	CCT5
ANKRD17	ESF1
ANKRD17	FAM49B
ANKRD17	FKBP1A
ANKRD17	FMNL2
ANKRD17	NENF
ANKRD44	ANXA1
ANKRD44	DCTN4
ANKRD44	FKBP15
ANKRD44	HLA-A
ANKRD44	ILK
ANKRD44	LYPLA2
ANKRD44	MAP3K7
ANKRD44	NCOA7
ANKRD44	PRKAR1A
ANKRD44	PROSC
ANKRD44	RNF214
ANO6	ARHGEF6
ANO6	EFTUD1
ANO6	HECTD1
ANO6	MTCH2
ANO6	RNASEL
ANO6	SWAP70
ANO6	TBC1D9B
ANP32A	DDX18
ANP32A	DLD
ANP32A	DLGAP4
ANP32A	EIF3J
ANP32A	MTPN
ANP32A	PPM1G
ANP32A	PRKCSH
ANP32A	RPL19
ANP32A	RPL35
ANP32A	RPS2
ANP32A	SYNCRIP
ANP32A	UCHL3
ANP32A	VBP1
ANP32B	LRPPRC
ANP32B	PRKDC
ANP32B	SNRNP200
ANP32E	C19orf10
ANP32E	CAT
ANP32E	CD44
ANP32E	CDK9
ANP32E	CSTB
ANP32E	HMGB1
ANP32E	IMPDH2
ANP32E	RPL3
ANP32E	SNAP23
ANP32E	TNS3
ANXA1	ARHGEF7
ANXA1	CORO1C
ANXA1	CPNE2
ANXA1	FAM129A
ANXA1	FKBP15
ANXA1	GSR
ANXA1	PRKAR1A
ANXA1	PROSC
ANXA1	RSU1
ANXA1	TGM2
ANXA11	ENO1
ANXA11	GRHPR
ANXA11	KRAS
ANXA11	LGALS1
ANXA11	LPXN
ANXA11	LSM4
ANXA11	RPL11
ANXA11	TUBB6
ANXA11	TWF2
ANXA2	APLP2
ANXA2	CFL1
ANXA2	ESD
ANXA2	GPX1
ANXA2	GSTO1
ANXA2	IGF2R
ANXA2	MAPKAPK3
ANXA2	NOP58
ANXA2	POTEF
ANXA2	PRKACA
ANXA2	RPS10
ANXA2	SH3BP1
ANXA2	TAB1
ANXA4	AP1B1
ANXA4	CASP8
ANXA4	CMAS
ANXA4	CYBB
ANXA4	FCHO2
ANXA4	GLUD1
ANXA4	GSTM4
ANXA4	HADHA
ANXA4	HDGFRP2
ANXA4	HNRPLL
ANXA4	IMMT
ANXA4	LONP1
ANXA4	LTA4H
ANXA4	MUT
ANXA4	OAT
ANXA4	PARS2
ANXA4	PDHA1
ANXA4	RAD21
ANXA4	RDBP
ANXA4	SNX2
ANXA4	VPS28
ANXA5	ASS1
ANXA5	BLVRB
ANXA5	CAMK2D
ANXA5	CARS
ANXA5	CPT2
ANXA5	CTSA
ANXA5	CTSS
ANXA5	CYBB
ANXA5	DBT
ANXA5	DNAJC3
ANXA5	ETFA
ANXA5	GLUD1
ANXA5	GSTM4
ANXA5	HEXB
ANXA5	HIBCH
ANXA5	IDH3B
ANXA5	IVD
ANXA5	KRT1
ANXA5	MRPS25
ANXA5	MUT
ANXA5	MYEF2
ANXA5	PAK1
ANXA5	PC
ANXA5	PGM2
ANXA5	PHB
ANXA5	PHGDH
ANXA5	PLOD1
ANXA5	RAP1A
ANXA5	SCPEP1
ANXA5	SLC25A24
ANXA5	SNX18
ANXA5	SRGAP2
ANXA5	TIMM44
ANXA5	TOMM70A
ANXA5	VCPIP1
ANXA6	BRD4
ANXA6	CDC73
ANXA6	TCERG1
AP1B1	AP2A2
AP1B1	GLUD1
AP1B1	GSTM4
AP1B1	HADHA
AP1B1	HDGFRP2
AP1B1	HNRPLL
AP1B1	IDH3A
AP1B1	IMMT
AP1B1	IVD
AP1B1	LONP1
AP1B1	LTA4H
AP1B1	OAT
AP1B1	PDHA1
AP1B1	SNX2
AP1B1	STK4
AP1G1	ATM
AP1G1	ERAP1
AP1G1	GDI2
AP1G1	LETM1
AP1G1	NAA16
AP1G1	RECQL
AP1G1	RNF213
AP1G1	SLC25A5
AP1G1	UBAP1
AP1M1	COG3
AP1M1	PANK4
AP1M1	TROVE2
AP2A1	ATP6V0D1
AP2A1	BMP2K
AP2A1	BPNT1
AP2A1	CPT2
AP2A1	CYB5R1
AP2A1	ETFB
AP2A1	GNAI2
AP2A1	HEXB
AP2A1	MYEF2
AP2A1	PGM2
AP2A1	PI4K2A
AP2A1	PRKAR2A
AP2A1	UBE2N
AP2A2	ASS1
AP2A2	CARS
AP2A2	CPT2
AP2A2	CTSA
AP2A2	CYB5R1
AP2A2	CYBB
AP2A2	DBT
AP2A2	ECH1
AP2A2	EPRS
AP2A2	ETFA
AP2A2	GCLC
AP2A2	GLUD1
AP2A2	GLUD2
AP2A2	H6PD
AP2A2	HARS2
AP2A2	HK1
AP2A2	IDH3B
AP2A2	IMMT
AP2A2	ITPR2
AP2A2	IVD
AP2A2	LIPA
AP2A2	PAK1
AP2A2	PARS2
AP2A2	PC
AP2A2	PHB
AP2A2	PLOD1
AP2A2	PPP2R1A
AP2A2	RAP1A
AP2A2	SAMHD1
AP2A2	SNX1
AP2A2	SNX18
AP2A2	SUCLG2
AP2A2	TOMM70A
AP2A2	VCPIP1
AP2A2	WASF2
AP2A2	WNK1
AP2B1	SMC1A
AP2M1	DDX19B
AP2M1	EIF2D
AP2M1	EPRS
AP2M1	GNPDA1
AP2M1	HDLBP
AP2M1	NECAP2
AP2M1	PLCB2
AP2M1	PPP1R7
AP2M1	PPP2R1A
AP2M1	RAP1GDS1
AP2M1	VCPIP1
AP3B1	ARHGEF1
AP3B1	ATG7
AP3B1	NCKAP1L
AP3B1	RAB1A
AP3B1	SLC25A6
AP3B1	ZNF622
AP3D1	DYNLL2
AP3D1	GFM1
AP3D1	RPS3
AP3M1	BRD3
AP3M1	CTPS2
AP3M1	PSMC2
AP3M1	PYGB
AP3M1	RAD21
AP3M1	TARS
AP3M1	THUMPD1
AP3M1	VPS28
APBB1IP	ATIC
APBB1IP	CORO1A
APBB1IP	DYNC1I2
APBB1IP	ENO1
APBB1IP	HSPA5
APBB1IP	LGALS1
APBB1IP	PPT1
APEH	CLIP1
APEH	DDX3X
APEH	EBNA1BP2
APEH	H1F0
APEH	HIST1H1B
APEH	RAD23B
APEH	RARS
APEH	REXO4
APEH	RPL21
APEH	RPL31
APEH	RPS14
APEH	S100A4
APEH	STRAP
APEH	TXNDC9
APEH	VPS37A
APEX1	FRG1
APEX1	PPM1G
APEX1	PUM2
APEX1	STK3
API5	C3
API5	CES1
API5	COPG2
API5	EHD1
API5	EIF5
API5	ERLIN1
API5	FAH
API5	HSD17B11
API5	HSPA4L
API5	ITPR1
API5	MYO18A
API5	NRP1
API5	OAS2
API5	POLR1A
API5	PPP6C
API5	PRRC1
API5	PTK2B
API5	RTF1
API5	SMARCC1
API5	SPTLC1
API5	STAT1
API5	STK38L
API5	TECR
API5	UGGT1
APIP	C11orf58
APIP	CLTB
APIP	DCTN2
APIP	EEA1
APIP	HP1BP3
APIP	LRRFIP2
APIP	MDH2
APIP	MTPN
APIP	PXN
APIP	RPL28
APIP	S100A11
APIP	SCARB2
APIP	SNRPC
APIP	TXLNA
APIP	TXNDC12
APIP	TXNRD1
APLP2	APRT
APLP2	CAST
APLP2	CD2AP
APLP2	CSRP1
APLP2	DAP
APLP2	HMGA1
APLP2	KIF13B
APLP2	LMNA
APLP2	MAT2B
APLP2	RPS10
APLP2	TAB1
APLP2	THOP1
APLP2	THRAP3
APMAP	CYBB
APMAP	CYFIP1
APMAP	INPPL1
APMAP	ITPR2
APMAP	MOV10
APMAP	PARP1
APMAP	PCF11
APMAP	RAC1
APMAP	UBE2N
APOA1BP	CAPZA1
APOA1BP	DLAT
APOA1BP	IK
APOA1BP	MRPL1
APOA1BP	MRPS31
APOA1BP	PCMT1
APOA1BP	PGK2
APOC2	ASAH1
APOC2	ATP5L
APOC2	C22orf28
APOC2	CASP1
APOC2	CD2AP
APOC2	CDK5RAP3
APOC2	CNDP2
APOC2	COPS7B
APOC2	COTL1
APOC2	CTSB
APOC2	CYC1
APOC2	EPN1
APOC2	FBP1
APOC2	FIS1
APOC2	GARS
APOC2	GATM
APOC2	GLUL
APOC2	GSTK1
APOC2	HNRNPUL2
APOC2	LACTB
APOC2	LRP1
APOC2	MRPL44
APOC2	NCF4
APOC2	NDUFA8
APOC2	NDUFS1
APOC2	NSUN2
APOC2	PARF
APOC2	PCK2
APOC2	PPIC
APOC2	PSMC3
APOC2	QKI
APOC2	RTCD1
APOC2	SUMF2
APOC2	TAF15
APOC2	TFAM
APOC2	TUFM
APOC2	WARS
APOC2	YARS
APOOL	ARPC3
APOOL	ATP6V0D1
APOOL	ATP6V1E1
APOOL	CASP1
APOOL	CTSB
APOOL	CYB5R3
APOOL	CYC1
APOOL	EPN1
APOOL	EPS15L1
APOOL	EVL
APOOL	FBP1
APOOL	KIF13B
APOOL	LIPA
APOOL	LRP1
APOOL	LRRC47
APOOL	MRPL44
APOOL	NDUFA8
APOOL	NDUFS1
APOOL	NSUN2
APOOL	PMPCB
APOOL	PPIC
APOOL	QPRT
APOOL	RTCD1
APOOL	SMS
APOOL	SUMF2
APOOL	TAF15
APOOL	UGDH
APOOL	YARS
APPL1	C9orf46
APPL1	HARS
APPL1	MRPL37
APPL1	PIK3R1
APPL1	PPP1CC
APPL1	RPS6KA1
APPL1	STXBP3
APRT	ATP6V1E1
APRT	CTSC
APRT	CYC1
APRT	GPX1
APRT	GSTO1
APRT	HMGA1
APRT	IMPA1
APRT	KIF13B
APRT	MAT2B
APRT	POTEF
APRT	RPS10
APRT	SLC3A2
APRT	TAB1
ARAP1	DIS3
ARAP1	ENO2
ARAP1	IFIH1
ARAP1	RPA1
ARAP1	SF3A3
ARCN1	ARHGEF1
ARCN1	ATG7
ARCN1	CLIP2
ARCN1	MYH9
ARCN1	TMED5
ARF1	DNAJB1
ARF1	DPP9
ARF1	EEF1A1
ARF1	GLT25D1
ARF1	GNB2L1
ARF1	RPSA
ARF1	SAFB2
ARF1	SNTB1
ARF1	UQCRB
ARFGAP1	MCM4
ARFGAP1	PIK3CB
ARFGAP1	RBM14
ARFGAP1	YTHDF2
ARFGAP1	YWHAQ
ARFGAP3	ARFGEF1
ARFGAP3	CAD
ARFGAP3	CAMSAP1
ARFGAP3	CHD4
ARFGAP3	FASN
ARFGAP3	NRD1
ARFGAP3	OAS2
ARFGAP3	PRMT3
ARFGAP3	SEC63
ARFGAP3	SQLE
ARFGAP3	TCP1
ARFGAP3	XPO5
ARFGEF1	CAD
ARFGEF1	CHD4
ARFGEF1	DOCK8
ARFGEF1	NRD1
ARFGEF1	PPP3CA
ARFGEF1	PRMT3
ARFGEF1	RPS4Y1
ARFGEF1	TCP1
ARFGEF1	XPO5
ARFGEF2	ATP1A1
ARFGEF2	ATP1B3
ARFGEF2	BAZ1B
ARFGEF2	CUTA
ARFGEF2	DOCK10.2
ARFGEF2	EIF4G1
ARFGEF2	ESYT2
ARFGEF2	GOLGB1
ARFGEF2	HSP90AA1
ARFGEF2	HSP90AB1
ARFGEF2	HSPH1
ARFGEF2	ICAM1
ARFGEF2	IREB2
ARFGEF2	MST4
ARFGEF2	NKRF
ARFGEF2	PANX1
ARFGEF2	SKP1
ARFGEF2	SRPRB
ARFGEF2	SYNRG
ARFGEF2	TRIM2
ARFGEF2	UBE2J1
ARFGEF2	ZCCHC6
ARFIP1	DPYSL2
ARFIP1	RAD23A
ARFIP1	RBM14
ARFIP1	YWHAB
ARGLU1	LARS2
ARGLU1	MRPL15
ARGLU1	SERPINB1
ARGLU1	WDR82
ARGLU1	ZEB2
ARHGAP15	CHAMP1
ARHGAP15	FAM50A
ARHGAP15	HTATSF1
ARHGAP15	IL1B
ARHGAP15	MCM2
ARHGAP15	MCM7
ARHGAP15	NFKB2
ARHGAP17	ARPP19
ARHGAP17	CBX3
ARHGAP17	CD81
ARHGAP17	DNAJC2
ARHGAP17	FBL
ARHGAP17	FUBP1
ARHGAP17	G3BP2
ARHGAP17	G6PD
ARHGAP17	HNRNPA1
ARHGAP17	LGALS3
ARHGAP17	LRRFIP1
ARHGAP17	MYL9
ARHGAP17	NDRG2
ARHGAP17	RBBP7
ARHGAP17	RPS12
ARHGAP17	SAFB
ARHGAP17	SNRPD2
ARHGAP17	SRSF9
ARHGAP17	YWHAZ
ARHGAP25	ARHGEF7
ARHGAP25	ARPC1A
[truncated: 11,024 more rows]
