# Supplementary material for: Context-enriched interactome powered by proteomics helps the identification of novel regulators of macrophage activation
Source: eLife. 2018 Oct 10;7:e37059. doi: 10.7554/eLife.37059 (PMC6179386; doi:10.7554/eLife.37059)
Supplement: Figure 1—source data 4. [file elife-37059-fig1-data4.xlsx]

## Sheet: LCC
	GO:CC	GO:MF	GO:BP	PPI2013	CORUM	MS	HINT-Binary	HINT-Cocomplex	hu.Map
M0 (OR)	1.63331	1.29083	1.31293	1.45871	1.51035	1.28514	1.61355	1.20947	1.37013
M0 (OR CI 1)	1.3542	0.999482	1.1423	1.26801	1.21247	1.062	1.13369	1.00593	1.04526
M0 (OR CI 2)	1.95443	1.64182	1.5023	1.67046	1.86195	1.5418	2.22977	1.44253	1.7653
M0 (pval)	5.065e-07	0.04378	0.0001276	2.67371e-07	0.0002444	0.008639	0.0062	0.03826	0.01918
M1 (OR)	1.2532	1.23345	1.14422	1.32024	1.36458	1.42634	1.54678	1.29011	1.42229
M1 (OR CI 1)	1.0768	1.0191	1.02803	1.18776	1.15957	1.25223	1.19814	1.13539	1.17901
M1 (OR CI 2)	1.45087	1.48032	1.27017	1.46368	1.5967	1.61835	1.96656	1.46035	1.70193
M1 (pval)	0.003228	0.027	0.01256	4.61682e-07	0.0001932	1.623e-07	0.0008183	9.852e-05	0.0002276
M2 (OR)	2.31182	1.32494	1.71207	1.69606	2.90221	1.73587	2.77137	1.66505	2.97049
M2 (OR CI 1)	1.96899	1.03364	1.51982	1.49726	2.44528	1.47822	2.13743	1.42865	2.48928
M2 (OR CI 2)	2.69919	1.67406	1.92242	1.91432	3.42533	2.02612	3.53685	1.92992	3.52012
M2 (pval)	2.93974e-21	0.02387	4.06241e-17	2.76184e-15	1.42893e-28	1.011e-10	1.322e-12	3.227e-10	2.9423e-27

## Sheet: All
	GO:CC	GO:MF	GO:BP	PPI2013	CORUM	MS	HINT-Binary	HINT-Cocomplex	hu.Map
M0 (OR)	1.59556	1.30399	1.31428	1.45871	1.48948	1.28299	1.6057	1.2098	1.33444
M0 (OR CI 1)	1.32327	1.00984	1.14347	1.26801	1.19898	1.06023	1.12824	1.00621	1.0188
M0 (OR CI 2)	1.90867	1.65824	1.50385	1.67046	1.83116	1.5392	2.21852	1.44292	1.7178
M0 (pval)	1.622e-06	0.03615	0.0001259	2.14e-07	0.0003045	0.008739	0.006413	0.03823	0.03084
M1 (OR)	1.26379	1.24929	1.14594	1.32024	1.41143	1.42331	1.55936	1.28927	1.48956
M1 (OR CI 1)	1.08605	1.03233	1.02957	1.18776	1.20168	1.24954	1.20793	1.13465	1.23735
M1 (OR CI 2)	1.46296	1.49911	1.27205	1.46368	1.6484	1.61489	1.98235	1.4594	1.77887
M1 (pval)	0.002368	0.01989	0.01154	3.867e-07	3.038e-05	2.048e-07	0.0005992	9.941e-05	2.943e-05
M2 (OR)	2.29018	1.28582	1.71404	1.69606	2.87964	1.73144	2.69476	1.66008	2.94019
M2 (OR CI 1)	1.95107	1.00338	1.52158	1.49726	2.43409	1.47444	2.07859	1.42439	2.47126
M2 (OR CI 2)	2.67312	1.62417	1.92467	1.91432	3.38737	2.02099	3.43866	1.92415	3.47422
M2 (pval)	7.8265e-21	0.03704	2.9348e-17	2.657e-15	5.95774e-29	1.446e-10	4.248e-12	4.625e-10	1.48415e-27
