# Supplementary material for: Context-enriched interactome powered by proteomics helps the identification of novel regulators of macrophage activation
Source: eLife. 2018 Oct 10;7:e37059. doi: 10.7554/eLife.37059 (PMC6179386; doi:10.7554/eLife.37059)
Supplement: Figure 3—figure supplement 1—source data 1. [file elife-37059-fig3-figsupp1-data1.xlsx]

## Sheet: M0M1M2_paths_q005_NEW_altlinkag
	M(-)	M(IFNg)	M(IL-4)
Cilium Assembly	1	0.0378377	1
Regulation of lipolysis in adipocytes - Homo sapiens (human)	1	0.0374216	1
SUMOylation of DNA damage response and repair proteins	1	0.0205501	1
IRS-mediated signalling	1	0.0245857	1
Influenza Viral RNA Transcription and Replication	1	0.0233237	1
control of skeletal myogenesis by hdac and calcium/calmodulin-dependent kinase (camk)	1	0.0221387	1
IRS-related events triggered by IGF1R	1	0.0299548	1
Signaling by FGFR in disease	1	0.0270931	1
mets affect on macrophage differentiation	1	0.0270707	1
sumoylation by ranbp2 regulates transcriptional repression	1	0.0176158	1
Activation of NMDA receptor and postsynaptic events	1	0.0176158	1
PTK6 Regulates RHO GTPases, RAS GTPase and MAP kinases	1	0.0176158	1
Huntington,s disease - Homo sapiens (human)	1	0.0155725	1
Signaling by FGFR1 in disease	1	0.0165398	1
Protein folding	1	0.0137998	1
Interactions of Vpr with host cellular proteins	1	0.0136771	1
Post NMDA receptor activation events	1	0.0136771	1
Chaperonin-mediated protein folding	1	0.0111798	1
cxcr4 signaling pathway	1	0.0117693	1
p38MAPK events	1	0.0117693	1
Vpr-mediated induction of apoptosis by mitochondrial outer membrane permeabilization	1	0.000939644	1
SOS-mediated signalling	1	0.00521955	1
Downstream signaling events of B Cell Receptor (BCR)	1	0.00936457	1
WNT mediated activation of DVL	1	0.00826835	1
Constitutive Signaling by AKT1 E17K in Cancer	0.0400414	0.0467362	1
FRS-mediated FGFR2 signaling	0.0400414	0.0467362	1
G beta:gamma signalling through PI3Kgamma	0.0238194	0.0286008	1
SHC-mediated cascade:FGFR3	0.0235669	0.0270707	1
G-protein beta:gamma signalling	0.0275048	0.0327382	1
Signaling by Type 1 Insulin-like Growth Factor 1 Receptor (IGF1R)	0.0275048	0.0327382	1
FRS-mediated FGFR3 signaling	0.0280037	0.0323034	1
SHC-mediated cascade:FGFR4	0.0280037	0.0323034	1
IGF1R signaling cascade	0.0262056	0.0314974	1
Metabolism of cofactors	0.0258431	0.0297338	1
Golgi Associated Vesicle Biogenesis	0.0336261	0.0405608	1
FRS-mediated FGFR1 signaling	0.034936	0.0405608	1
SHC-mediated cascade:FGFR2	0.034936	0.0405608	1
Adrenergic signaling in cardiomyocytes - Homo sapiens (human)	0.0332213	0.0427507	1
FCERI mediated NF-kB activation	0.034936	0.0436172	1
FRS-mediated FGFR4 signaling	0.0326051	0.0378084	1
role of brca1 brca2 and atr in cancer susceptibility	0.0326051	0.0378084	1
Role of LAT2/NTAL/LAB on calcium mobilization	0.0295487	0.0366736	1
SHC-mediated cascade:FGFR1	0.0301704	0.034962	1
phosphoinositides and their downstream targets	0.0301704	0.034962	1
apoptotic signaling in response to dna damage	0.0151869	0.0176158	1
SHC1 events in ERBB4 signaling	0.0151869	0.0176158	1
AKT phosphorylates targets in the cytosol	0.0151869	0.0176158	1
Regulation of TP53 Activity through Association with Co-factors	0.0151869	0.0176158	1
TFAP2 (AP-2) family regulates transcription of growth factors and their receptors	0.0172737	0.0198814	1
Metabolism of nitric oxide	0.0193594	0.0221387	1
eNOS activation and regulation	0.0193594	0.0221387	1
Lysosome Vesicle Biogenesis	0.00129816	0.0136771	1
il 4 signaling pathway	0.00117287	0.0198814	1
Endocrine and other factor-regulated calcium reabsorption - Homo sapiens (human)	0.00364008	0.00474671	1
ras signaling pathway	0.00264142	0.00328716	1
il 3 signaling pathway	0.011733	0.0136771	1
epo signaling pathway	0.0100213	0.0117693	1
MET activates RAS signaling	0.0100213	0.0117693	1
eNOS activation	0.0100213	0.0117693	1
HuR (ELAVL1) binds and stabilizes mRNA	0.00570827	0.00671977	1
Activated NTRK2 signals through RAS	0.00702085	0.00826835	1
SHC-related events triggered by IGF1R	0.00702085	0.00826835	1
Downstream signaling of activated FGFR2	0.0076216	0.00936457	1
Tetrahydrobiopterin (BH4) synthesis, recycling, salvage and regulation	0.00839417	0.00993401	1
Downstream signaling of activated FGFR1	0.00825608	0.0101158	1
p38 mapk signaling pathway	0.00825608	0.0101158	1
Influenza Infection	0.0436856	0.00210236	1
nfat and hypertrophy of the heart	0.0194625	0.0037916	1
Influenza Life Cycle	0.0298251	0.00701287	1
downregulated of mta-3 in er-negative breast tumors	0.0301704	0.000281026	1
CHL1 interactions	1	1	0.00785729
Fibronectin matrix formation	1	1	0.00371625
SUMOylation of transcription cofactors	1	1	0.000958534
DARPP-32 events	1	1	0.0413767
protein kinase a at the centrosome	1	1	0.013145
Arrhythmogenic right ventricular cardiomyopathy (ARVC) - Homo sapiens (human)	1	1	0.016069
transcription regulation by methyltransferase of carm1	1	1	0.0169368
Protein processing in endoplasmic reticulum - Homo sapiens (human)	1	1	0.0209082
Transcription of E2F targets under negative control by DREAM complex	1	1	0.0213361
MET activates PTK2 signaling	1	1	0.0257307
PKA-mediated phosphorylation of CREB	1	1	0.0257307
PKA activation	1	1	0.0234963
PKA activation in glucagon signalling	1	1	0.0234963
B-WICH complex positively regulates rRNA expression	1	1	0.0331109
nitric oxide signaling pathway	1	1	0.02819
Dilated cardiomyopathy (DCM) - Homo sapiens (human)	1	1	0.0294872
Syndecan interactions	1	1	0.0306681
Nuclear Events (kinase and transcription factor activation)	0.0400414	1	0.0440685
Ubiquitin mediated proteolysis - Homo sapiens (human)	0.0282682	1	0.0323686
pkc-catalyzed phosphorylation of inhibitory phosphoprotein of myosin phosphatase	0.0301704	1	0.0331086
caspase cascade in apoptosis	0.034936	1	0.0384697
induction of apoptosis through dr3 and dr4/5 death receptors	0.034936	1	0.0384697
Circadian entrainment - Homo sapiens (human)	0.0321777	1	0.0363679
ERK/MAPK targets	0.0326051	1	0.0358559
RHO GTPases activate PAKs	0.000198717	1	0.0331086
RHO GTPases Activate ROCKs	0.00229546	1	0.02819
NOTCH3 Intracellular Domain Regulates Transcription	0.00264142	1	0.0306681
fas signaling pathway (cd95)	0.00264142	1	0.0306681
Formation of the beta-catenin:TCF transactivating complex	0.0295487	1	0.008509
Deregulated CDK5 triggers multiple neurodegenerative pathways in Alzheimer,s disease models	0.0235669	1	0.00235943
Neurodegenerative Diseases	0.0235669	1	0.00235943
Activation of RAC1	0.0151869	1	0.0169368
RUNX3 regulates NOTCH signaling	0.0151869	1	0.0169368
Binding and Uptake of Ligands by Scavenger Receptors	0.016349	1	0.0185179
Generation of second messenger molecules	0.016349	1	0.0185179
Smooth Muscle Contraction	0.0112384	1	0.0128711
TRAF3-dependent IRF activation pathway	0.0133674	1	0.014932
Advanced glycosylation endproduct receptor signaling	0.0133674	1	0.014932
ERKs are inactivated	0.0133674	1	0.014932
Factors involved in megakaryocyte development and platelet production	0.0244983	1	0.0281047
Type II diabetes mellitus - Homo sapiens (human)	0.0215646	1	0.0240665
role of pi3k subunit p85 in regulation of actin organization and cell migration	0.0214361	1	0.0234963
ucalpain and friends in cell spread	0.0214361	1	0.0234963
Cell-extracellular matrix interactions	0.0193594	1	0.0213361
Opioid Signalling	0.0199226	1	0.0227769
MAPK targets/ Nuclear events mediated by MAP kinases	0.00825608	1	0.00948127
DAG and IP3 signaling	0.00888949	1	0.0101879
role of -arrestins in the activation and targeting of map kinases	0.00888949	1	0.0101879
PI5P Regulates TP53 Acetylation	0.00702085	1	0.00785729
stat3 signaling pathway	0.00570827	1	0.00629333
Mitotic Prophase	0.00961185	1	0.00309351
RHO GTPases activate PKNs	0.00776994	1	0.00198366
Negative feedback regulation of MAPK pathway	0.00330064	1	0.00371625
ras-independent pathway in nk cell-mediated cytotoxicity	0.00343236	1	0.00392284
LRR FLII-interacting protein 1 (LRRFIP1) activates type I IFN production	0.00229546	1	0.00264539
Localization of the PINCH-ILK-PARVIN complex to focal adhesions	0.00143068	1	0.00170425
MAPK3 (ERK1) activation	0.000357047	1	0.00948127
ceramide signaling pathway	0.00105006	1	0.0110564
p130Cas linkage to MAPK signaling for integrins	0.00117287	1	0.019085
Thyroid hormone synthesis - Homo sapiens (human)	0.00297249	1	0.0173624
erythropoietin mediated neuroprotection through nf-kb	0.00096254	1	0.0169368
