# Supplementary material for: Context-enriched interactome powered by proteomics helps the identification of novel regulators of macrophage activation
Source: eLife. 2018 Oct 10;7:e37059. doi: 10.7554/eLife.37059 (PMC6179386; doi:10.7554/eLife.37059)
Supplement: Figure 3—source data 1. [file elife-37059-fig3-data1.xlsx]

## Sheet: PPI_M0_topN_paths.tab
p-value	q-value	pathway	source	external_id	members_input_overlap	members_input_overlap_geneids	size	effective_size
1.75524e-41	1.74296e-38	Peptide chain elongation	Reactome	R-HSA-156902	RPS13; RPS11; RPS16; RPL8; RPL9; RPL6; RPL7; RPS27A; RPS15A; RPS7; RPS3; RPS2; RPS9; RPS8; RPL7A; RPL24; RPL26; RPL21; RPL23; EEF1A1; RPL5; RPS20; RPL14; RPL11; RPL12; RPL13; RPS4X; RPL18; RPSA; RPLP0; RPL30; RPL31; UBA52; RPS3A	6203; 6137; 6189; 6205; 6210; 6133; 6144; 6233; 6202; 6136; 6160; 6188; 6130; 6201; 6154; 9349; 6129; 6132; 6156; 7311; 9045; 6191; 6125; 6224; 6128; 6207; 6141; 6152; 6135; 6217; 1915; 3921; 6187; 6175	101	100
3.62796e-41	1.80128e-38	Metabolism of RNA	Reactome	R-HSA-8953854	RPS13; RPS11; RPL26; RPL5; RPS16; SF3B3; RPL9; RPL6; RPL7; HSPA8; SF3B1; RPS15A; SF3B2; RPS7; AKT1; HNRNPH1; RPS2; RPL23; NUDT21; PRPF3; RPS9; RPS8; SNRNP200; RPL7A; RPL8; RPL24; U2AF2; RPL21; HNRNPU; PRPF40A; LSM4; HNRNPA2B1; PABPC1; HNRNPC; HNRNPM; DHX9; CDC5L; RPLP0; RPS20; PRKCA; HNRNPA1; PRKCD; RPL14; RPL11; RPL12; RPL13; RPS4X; RPS27A; RPL18; SNW1; RPSA; SRRM2; RPL30; RPL31; DDX5; UBA52; RP…	207; 5578; 23020; 6133; 6144; 988; 6130; 6189; 6156; 6191; 23451; 22938; 11338; 1660; 6135; 6187; 6152; 3192; 6210; 55660; 6136; 11051; 23524; 9129; 1655; 7311; 3312; 23450; 3187; 6175; 6203; 6201; 5580; 6188; 3181; 6132; 6125; 6129; 3921; 6233; 6137; 3183; 4670; 26986; 4904; 6205; 10992; 6202; 6160; 9349; 6141; 6154; 3178; 9045; 9775; 25804; 6224; 6128; 6207; 6217	586	584
1.24441e-40	3.08924e-38	Eukaryotic Translation Elongation	Reactome	R-HSA-156842	RPS13; RPS11; RPS16; RPL8; RPL9; RPL6; RPL7; RPS27A; RPS15A; RPS7; RPS3; RPS2; RPS9; RPS8; RPL7A; RPL24; RPL26; RPL21; RPL23; EEF1A1; RPL5; RPS20; RPL14; RPL11; RPL12; RPL13; RPS4X; RPL18; RPSA; RPLP0; RPL30; RPL31; UBA52; RPS3A	6203; 6137; 6189; 6233; 6205; 6210; 6133; 6144; 6202; 6136; 6160; 6188; 6130; 6201; 6154; 9349; 6129; 6132; 6156; 7311; 9045; 6191; 6125; 6224; 6128; 6207; 6141; 6152; 6135; 6217; 1915; 3921; 6187; 6175	106	105
1.24441e-40	3.08924e-38	Nonsense Mediated Decay (NMD) independent of the Exon Junction Complex (EJC)	Reactome	R-HSA-975956	RPS13; RPS11; RPS16; RPL8; RPL9; RPL6; RPL7; RPS27A; RPS15A; RPS7; RPS3; RPS2; RPS9; RPS8; RPL7A; RPL24; RPL26; RPL21; RPL23; PABPC1; RPL5; RPS20; RPL14; RPL11; RPL12; RPL13; RPS4X; RPL18; RPSA; RPLP0; RPL30; RPL31; UBA52; RPS3A	6203; 6137; 6189; 26986; 6233; 6205; 6210; 6133; 6144; 6202; 6136; 6160; 6188; 6130; 6201; 6154; 9349; 6129; 6132; 6156; 7311; 9045; 6191; 6125; 6224; 6128; 6207; 6141; 6152; 6135; 6217; 3921; 6187; 6175	106	105
1.95469e-40	3.23501e-38	Nonsense Mediated Decay (NMD) enhanced by the Exon Junction Complex (EJC)	Reactome	R-HSA-975957	RPS13; RPS11; RPS16; RPL8; RPL9; RPL6; RPL7; RPS27A; RPS15A; RPS7; RPS3; RPS2; RPS9; RPS8; RPL7A; RPL24; RPL26; RPL21; RPL23; PABPC1; RPL5; RPS20; RPL14; RPL11; RPL12; RPL13; RPS4X; RPL18; RPSA; RPLP0; RPL30; RPL31; UBA52; RPS3A; EIF4A3	6203; 6137; 6189; 26986; 6233; 6205; 6210; 6133; 6144; 6202; 6136; 6160; 6188; 6130; 6201; 6154; 9349; 6129; 6132; 6156; 7311; 9045; 6191; 6125; 6224; 6128; 6207; 9775; 6141; 6152; 6135; 6217; 3921; 6187; 6175	118	117
1.95469e-40	3.23501e-38	Nonsense-Mediated Decay (NMD)	Reactome	R-HSA-927802	RPS13; RPS11; RPS16; RPL8; RPL9; RPL6; RPL7; RPS27A; RPS15A; RPS7; RPS3; RPS2; RPS9; RPS8; RPL7A; RPL24; RPL26; RPL21; RPL23; PABPC1; RPL5; RPS20; RPL14; RPL11; RPL12; RPL13; RPS4X; RPL18; RPSA; RPLP0; RPL30; RPL31; UBA52; RPS3A; EIF4A3	6203; 6137; 6189; 26986; 6233; 6205; 6210; 6133; 6144; 6202; 6136; 6160; 6188; 6130; 6201; 6154; 9349; 6129; 6132; 6156; 7311; 9045; 6191; 6125; 6224; 6128; 6207; 9775; 6141; 6152; 6135; 6217; 3921; 6187; 6175	118	117
2.98068e-39	3.69976e-37	Eukaryotic Translation Termination	Reactome	R-HSA-72764	RPS13; RPS11; RPS16; RPL8; RPL9; RPL6; RPL7; RPS27A; RPS15A; RPS7; RPS3; RPS2; RPS9; RPS8; RPL7A; RPL24; RPL26; RPL21; RPL23; RPL5; RPS20; RPL14; RPL11; RPL12; RPL13; RPS4X; RPL18; RPSA; RPLP0; RPL30; RPL31; UBA52; RPS3A	6203; 6137; 6189; 6233; 6205; 6210; 6133; 6144; 6202; 6136; 6160; 6188; 6130; 6201; 6154; 9349; 6129; 6132; 6156; 7311; 9045; 6191; 6125; 6224; 6128; 6207; 6141; 6152; 6135; 6217; 3921; 6187; 6175	104	103
2.98068e-39	3.69976e-37	Selenocysteine synthesis	Reactome	R-HSA-2408557	RPS13; RPS11; RPS16; RPL8; RPL9; RPL6; RPL7; RPS27A; RPS15A; RPS7; RPS3; RPS2; RPS9; RPS8; RPL7A; RPL24; RPL26; RPL21; RPL23; RPL5; RPS20; RPL14; RPL11; RPL12; RPL13; RPS4X; RPL18; RPSA; RPLP0; RPL30; RPL31; UBA52; RPS3A	6203; 6137; 6189; 6233; 6205; 6210; 6133; 6144; 6202; 6136; 6160; 6188; 6130; 6201; 6154; 9349; 6129; 6132; 6156; 7311; 9045; 6191; 6125; 6224; 6128; 6207; 6141; 6152; 6135; 6217; 3921; 6187; 6175	104	103
6.12202e-38	6.75463e-36	L13a-mediated translational silencing of Ceruloplasmin expression	Reactome	R-HSA-156827	RPS13; RPS11; RPS16; RPL8; RPL9; RPL6; RPL7; RPS27A; RPS15A; RPS7; RPS3; RPS2; RPS9; RPS8; RPL7A; RPL24; RPL26; RPL21; RPL23; PABPC1; RPL5; RPS20; RPL14; RPL11; RPL12; RPL13; RPS4X; RPL18; RPSA; RPLP0; RPL30; RPL31; UBA52; RPS3A	6203; 6137; 6189; 26986; 6233; 6205; 6210; 6133; 6144; 6202; 6136; 6160; 6188; 6130; 6201; 6154; 9349; 6129; 6132; 6156; 7311; 9045; 6191; 6125; 6224; 6128; 6207; 6141; 6152; 6135; 6217; 3921; 6187; 6175	125	123
1.02641e-37	1.01923e-35	Formation of a pool of free 40S subunits	Reactome	R-HSA-72689	RPS13; RPS11; RPS16; RPL8; RPL9; RPL6; RPL7; RPS27A; RPS15A; RPS7; RPS3; RPS2; RPS9; RPS8; RPL7A; RPL24; RPL26; RPL21; RPL23; RPL5; RPS20; RPL14; RPL11; RPL12; RPL13; RPS4X; RPL18; RPSA; RPLP0; RPL30; RPL31; UBA52; RPS3A	6203; 6137; 6189; 6233; 6205; 6210; 6133; 6144; 6202; 6136; 6160; 6188; 6130; 6201; 6154; 9349; 6129; 6132; 6156; 7311; 9045; 6191; 6125; 6224; 6128; 6207; 6141; 6152; 6135; 6217; 3921; 6187; 6175	115	113
6.8172e-37	5.64123e-35	Cap-dependent Translation Initiation	Reactome	R-HSA-72737	RPS13; RPS11; RPS16; RPL8; RPL9; RPL6; RPL7; RPS27A; RPS15A; RPS7; RPS3; RPS2; RPS9; RPS8; RPL7A; RPL24; RPL26; RPL21; RPL23; PABPC1; RPL5; RPS20; RPL14; RPL11; RPL12; RPL13; RPS4X; RPL18; RPSA; RPLP0; RPL30; RPL31; UBA52; RPS3A	6203; 6137; 6189; 26986; 6233; 6205; 6210; 6133; 6144; 6202; 6136; 6160; 6188; 6130; 6201; 6154; 9349; 6129; 6132; 6156; 7311; 9045; 6191; 6125; 6224; 6128; 6207; 6141; 6152; 6135; 6217; 3921; 6187; 6175	133	131
6.8172e-37	5.64123e-35	Eukaryotic Translation Initiation	Reactome	R-HSA-72613	RPS13; RPS11; RPS16; RPL8; RPL9; RPL6; RPL7; RPS27A; RPS15A; RPS7; RPS3; RPS2; RPS9; RPS8; RPL7A; RPL24; RPL26; RPL21; RPL23; PABPC1; RPL5; RPS20; RPL14; RPL11; RPL12; RPL13; RPS4X; RPL18; RPSA; RPLP0; RPL30; RPL31; UBA52; RPS3A	6203; 6137; 6189; 26986; 6233; 6205; 6210; 6133; 6144; 6202; 6136; 6160; 6188; 6130; 6201; 6154; 9349; 6129; 6132; 6156; 7311; 9045; 6191; 6125; 6224; 6128; 6207; 6141; 6152; 6135; 6217; 3921; 6187; 6175	133	131
2.45781e-36	1.87739e-34	SRP-dependent cotranslational protein targeting to membrane	Reactome	R-HSA-1799339	RPS13; RPS11; RPS16; RPL8; RPL9; RPL6; RPL7; RPS27A; RPS15A; RPS7; RPS3; RPS2; RPS9; RPS8; RPL7A; RPL24; RPL26; RPL21; RPL23; RPL5; RPS20; RPL14; RPL11; RPL12; RPL13; RPS4X; RPL18; RPSA; RPLP0; RPL30; RPL31; UBA52; RPS3A	6203; 6137; 6189; 6233; 6205; 6210; 6133; 6144; 6202; 6136; 6160; 6188; 6130; 6201; 6154; 9349; 6129; 6132; 6156; 7311; 9045; 6191; 6125; 6224; 6128; 6207; 6141; 6152; 6135; 6217; 3921; 6187; 6175	124	123
3.31879e-36	2.35397e-34	GTP hydrolysis and joining of the 60S ribosomal subunit	Reactome	R-HSA-72706	RPS13; RPS11; RPS16; RPL8; RPL9; RPL6; RPL7; RPS27A; RPS15A; RPS7; RPS3; RPS2; RPS9; RPS8; RPL7A; RPL24; RPL26; RPL21; RPL23; RPL5; RPS20; RPL14; RPL11; RPL12; RPL13; RPS4X; RPL18; RPSA; RPLP0; RPL30; RPL31; UBA52; RPS3A	6203; 6137; 6189; 6233; 6205; 6210; 6133; 6144; 6202; 6136; 6160; 6188; 6130; 6201; 6154; 9349; 6129; 6132; 6156; 7311; 9045; 6191; 6125; 6224; 6128; 6207; 6141; 6152; 6135; 6217; 3921; 6187; 6175	126	124
1.07239e-35	7.09924e-34	Selenoamino acid metabolism	Reactome	R-HSA-2408522	RPS13; RPS11; RPS16; RPL8; RPL9; RPL6; RPL7; RPL5; RPS15A; RPS7; RPS3; RPS2; RPS9; RPS8; RPL7A; RPL24; RPL26; RPL21; RPL23; RPS27A; RPS20; RPL14; RPL11; RPL12; RPL13; RPS4X; RPL18; RPSA; RPLP0; RPL30; RPL31; UBA52; RPS3A	6203; 6137; 6205; 6210; 6133; 6144; 6202; 6136; 6160; 6188; 6130; 6201; 9349; 6129; 6189; 6154; 6132; 6156; 7311; 9045; 6191; 6125; 6224; 6128; 6207; 6141; 6152; 6135; 6217; 3921; 6187; 6233; 6175	129	128
6.86234e-33	4.25894e-31	Ribosome - Homo sapiens (human)	KEGG	path:hsa03010	RPS13; RPS11; RPL5; RPS16; RPL8; RPL9; RPL6; RPL7; RPLP0; RPS15A; RPS7; RPS3; RPS2; RPS9; RPS8; RPL7A; RPL24; RPL26; RPL21; RPL23; RPS27A; RPS20; RPL14; RPL11; RPL12; RPL13; RPS4X; RPL18; RPSA; RPL30; RPL31; UBA52; RPS3A	6144; 6152; 6154; 6156; 6175; 6187; 6188; 6189; 6191; 6201; 6202; 6203; 6205; 6207; 6210; 6217; 6224; 6233; 6160; 9349; 7311; 3921; 9045; 6125; 6128; 6129; 6130; 6132; 6133; 6135; 6136; 6137; 6141	154	153
6.31756e-25	3.6902e-23	Translation	Reactome	R-HSA-72766	RPS13; RPS11; RPS16; RPL8; RPL9; RPL6; PABPC1; RPL5; RPS15A; RPS7; RPS3; RPS2; RPS9; RPS8; RPL7A; RPL24; RPL26; RPL21; RPL23; EEF1A1; RPS27A; RPS20; RPL7; RPL14; RPL11; RPL12; RPL13; RPS4X; RPL18; RPSA; RPLP0; RPL30; RPL31; UBA52; RPS3A	6137; 6133; 6205; 26986; 6233; 6135; 6210; 6144; 6125; 6136; 6202; 6160; 6188; 6130; 6201; 6217; 9349; 6187; 6132; 6156; 6154; 9045; 6191; 3921; 6224; 6128; 6189; 6207; 6152; 7311; 6141; 1915; 6129; 6203; 6175	310	307
3.40267e-22	1.87714e-20	Diseases of signal transduction	Reactome	R-HSA-5663202	RPS27A; EGFR; RAP1A; AKT1; ARRB2; ARRB1; LMNA; STAT1; FYN; MAPK3; MAPK1; MYC; SRC; SHC1; VCL; SMAD2; MDM2; EP300; SNW1; FN1; ESR1; VAV1; PHB; PTPN11; UBA52; GRB2; UBB; UBC; HSP90AA1; LCK	2534; 1956; 6464; 5594; 4193; 6772; 4000; 6714; 5781; 5906; 2099; 2335; 2033; 3932; 5245; 2885; 7311; 7414; 207; 7314; 22938; 5595; 3320; 409; 4087; 7316; 408; 4609; 6233; 7409	247	247
1.79302e-21	9.25274e-20	Metabolism of amino acids and derivatives	Reactome	R-HSA-71291	RPS13; RPS11; RPS16; RPL8; RPL9; RPL6; RPL7; RPL5; RPS15A; RPS7; RPS3; RPS2; RPS9; RPS8; RPL7A; RPL24; RPL26; RPL21; RPL23; RPS27A; RPS20; RPL14; RPL11; RPL12; RPL13; RPS4X; RPL18; RPSA; RPLP0; RPL30; RPL31; UBA52; RPS3A	6203; 6137; 6205; 6135; 6210; 6144; 6136; 6160; 6188; 6130; 6201; 6189; 6187; 6132; 6156; 6141; 6154; 7311; 9045; 6133; 6191; 6125; 6224; 6128; 6207; 6152; 6217; 6129; 3921; 6202; 9349; 6233; 6175	338	335
1.86359e-21	9.25274e-20	Disease	Reactome	R-HSA-1643685	SSRP1; JUN; RPS27A; EGFR; SMAD2; CTNNB1; AKT1; ARRB2; CLTC; ARRB1; MDM2; XRCC6; STAT1; FYN; MAPK3; MAPK1; MYC; SRC; SHC1; KPNB1; VCL; HGS; SLC25A5; RAP1A; LMNA; EP300; NPM1; SNW1; FN1; ESR1; VAV1; PHB; PTPN11; UBA52; GRB2; UBB; UBC; HSP90AA1; LCK	207; 4193; 408; 6714; 2335; 22938; 2885; 5595; 4087; 7316; 1499; 2534; 6772; 5906; 2033; 3932; 5245; 7311; 3320; 409; 4000; 1213; 7409; 3725; 7414; 7314; 6749; 4609; 6233; 1956; 2547; 6464; 5594; 292; 2099; 5781; 9146; 4869; 3837	509	507
2.30549e-18	1.09017e-16	Signaling by Receptor Tyrosine Kinases	Reactome	R-HSA-9006934	RPS27A; EGFR; RAP1A; CTNNB1; AKT1; HNRNPH1; CLTC; STAT1; FYN; MAPK3; MAPK1; PXN; LYN; HNRNPM; SRC; SHC1; PRKCA; HNRNPA1; PRKCD; HGS; NCK1; ESR1; VAV1; PTPN11; PAK1; UBA52; GRB2; PRKACA; UBB; UBC; HSP90AA1; LCK; CDC42	5578; 2885; 5595; 5829; 7316; 1499; 2534; 6772; 4690; 5781; 5906; 5058; 3932; 7311; 3320; 3187; 1213; 6714; 7409; 998; 5580; 3178; 7314; 207; 6233; 4067; 1956; 4670; 6464; 5594; 5566; 2099; 9146	422	422
9.03751e-18	4.0792e-16	mRNA Splicing - Major Pathway	Reactome	R-HSA-72163	HSPA8; SF3B1; SF3B3; SF3B2; HNRNPH1; NUDT21; PRPF3; SNRNP200; U2AF2; HNRNPU; PRPF40A; HNRNPM; HNRNPC; HNRNPA2B1; DHX9; CDC5L; LSM4; HNRNPA1; SNW1; SRRM2; DDX5; YBX1; EIF4A3	3183; 3192; 4670; 4904; 55660; 10992; 988; 23020; 11051; 23451; 3181; 9129; 22938; 1655; 3178; 9775; 25804; 3312; 23450; 11338; 23524; 3187; 1660	178	178
2.45615e-17	1.06042e-15	mRNA Splicing	Reactome	R-HSA-72172	HSPA8; SF3B1; SF3B3; SF3B2; HNRNPH1; NUDT21; PRPF3; SNRNP200; U2AF2; HNRNPU; PRPF40A; HNRNPM; HNRNPC; HNRNPA2B1; DHX9; CDC5L; LSM4; HNRNPA1; SNW1; SRRM2; DDX5; YBX1; EIF4A3	3183; 3192; 4670; 4904; 55660; 10992; 988; 23020; 11051; 23451; 3181; 9129; 22938; 1655; 3178; 9775; 25804; 3312; 23450; 11338; 23524; 3187; 1660	186	186
3.1464e-17	1.30182e-15	MAPK family signaling cascades	Reactome	R-HSA-5683057	JUN; RPS27A; EGFR; RAP1A; ARRB2; ARRB1; SPTBN1; FYN; MAPK3; MAPK1; MYC; SRC; SHC1; VCL; FN1; PHB; PTPN11; CDK1; UBA52; GRB2; PRKACA; UBB; UBC; PAK1; CDC42	3725; 409; 983; 408; 6464; 6711; 998; 6714; 5566; 5906; 2335; 2534; 5058; 5245; 1956; 5781; 2885; 7311; 7414; 4609; 7314; 5594; 5595; 7316; 6233	235	234
3.57288e-17	1.41915e-15	Metabolism of proteins	Reactome	R-HSA-392499	RPS13; PCNA; RPS11; RPS16; HSPA5; RPL9; RPL6; RPL7; EP300; RPL5; SMAD2; COPS5; RPS7; VHL; ARRB2; IKBKG; ARRB1; RPS3; RPS9; RPS8; RPL7A; RPS2; TRAF6; RPL24; RPL26; RPL21; RPL23; HSPD1; SPTBN1; EEF1A1; MYC; HNRNPC; RPL8; BRCA1; RPLP0; RPS20; PABPC1; PARP1; HGS; RPL14; RPS15A; RPL12; RPL13; RPS4X; HSPA8; MDM2; RPS27A; RPL18; CSNK2A1; UBE2I; TP53; FN1; RPSA; ESR1; HSP90B1; PRKDC; ALB; RPL30; RPL31; C…	4193; 6133; 6144; 6130; 6201; 4087; 6210; 2033; 409; 6175; 6154; 6125; 7314; 3921; 6233; 3309; 8517; 672; 10987; 408; 6191; 6156; 6135; 7316; 6203; 7184; 324; 142; 6207; 4609; 6137; 6205; 6202; 6224; 6217; 1457; 2335; 213; 983; 6136; 6129; 7311; 7189; 6187; 7157; 5111; 1915; 6711; 6160; 9349; 9045; 6128; 6189; 3312; 60; 6141; 6152; 5591; 6188; 3329; 3183; 7329; 26986; 6132; 2099; 7428; 9146	2008	1999
8.60319e-17	3.28576e-15	Intracellular signaling by second messengers	Reactome	R-HSA-9006925	MOV10; JUN; RPS27A; EGFR; AKT1; FYN; MAPK3; MAPK1; SRC; TRAF6; PRKCA; TRIM27; PRKCD; MDM2; CSNK2A1; TP53; ESR1; VAV1; PTPN11; UBA52; GRB2; PRKACA; UBB; UBC; LCK	3725; 5578; 2534; 1956; 1457; 5594; 4193; 5580; 5987; 7157; 3932; 7314; 6714; 5566; 4343; 2099; 5781; 2885; 7311; 207; 5595; 7316; 7189; 7409; 6233	244	244
9.6084e-16	3.53376e-14	Translation initiation complex formation	Reactome	R-HSA-72649	RPS13; RPS11; RPS20; RPS16; RPSA; PABPC1; RPS27A; RPS15A; RPS7; RPS3A; RPS2; RPS4X; RPS3; RPS9; RPS8	6203; 6207; 6205; 6202; 6189; 26986; 6217; 6188; 6201; 3921; 6187; 6191; 6233; 6224; 6210	68	66
1.04097e-15	3.69171e-14	Axon guidance	Reactome	R-HSA-422475	MYH10; HSPA8; EGFR; CLTC; ABL1; SPTBN1; MYH9; FYN; HSP90AB1; MAPK3; MAPK1; LYN; SRC; RPS27A; SHC1; PRKCA; CSNK2A1; NCK1; PTPN11; UBA52; GRB2; PRKACA; UBB; UBC; HSP90AA1; ACTB; PAK1; CDC42	4690; 5578; 1457; 6714; 2885; 5595; 7316; 2534; 3326; 60; 5058; 7311; 3312; 998; 25; 4627; 7314; 6233; 4067; 3320; 1956; 4628; 6464; 5594; 6711; 5566; 5781; 1213	357	356
1.22562e-15	4.19668e-14	Activation of the mRNA upon binding of the cap-binding complex and eIFs, and subsequent binding to 43S	Reactome	R-HSA-72662	RPS13; RPS11; RPS20; RPS16; RPSA; PABPC1; RPS27A; RPS15A; RPS7; RPS3A; RPS2; RPS4X; RPS3; RPS9; RPS8	6203; 6207; 6189; 26986; 6217; 6188; 6201; 3921; 6187; 6205; 6202; 6191; 6233; 6224; 6210	69	67
1.41948e-15	4.69847e-14	Epstein-Barr virus infection - Homo sapiens (human)	KEGG	path:hsa05169	HLA-B; HSPA8; PLCG2; IKBKG; YWHAZ; JUN; RB1; NFKB1; LYN; YWHAG; TRAF6; MDM2; EP300; MYC; CSNK2A1; SNW1; TP53; AKT1; VIM; CDK1; CDK2; PRKACA	4609; 7189; 3106; 4193; 3725; 4790; 207; 5336; 3312; 7431; 4067; 5925; 8517; 1017; 7532; 7534; 22938; 1457; 5566; 983; 2033; 7157	203	199
1.75611e-15	5.44944e-14	Viral carcinogenesis - Homo sapiens (human)	KEGG	path:hsa05203	HLA-B; IKBKG; YWHAZ; JUN; RB1; MAPK3; MAPK1; PXN; NFKB1; LYN; YWHAG; SRC; DDX3X; MDM2; EP300; SNW1; TP53; CDK1; CDK2; GRB2; PRKACA; CDC42	3106; 6714; 4193; 1654; 5829; 4790; 983; 5925; 2885; 3725; 7532; 7534; 22938; 8517; 5566; 5594; 5595; 4067; 998; 2033; 7157; 1017	201	201
1.75611e-15	5.44944e-14	Proteoglycans in cancer - Homo sapiens (human)	KEGG	path:hsa05205	EGFR; SMAD2; CTNNB1; AKT1; MAPK3; MAPK1; PXN; MYC; SRC; PRKCA; PLCG2; MDM2; TP53; FN1; ESR1; PTPN11; DDX5; GRB2; PRKACA; ACTB; PAK1; CDC42	4609; 6714; 60; 1655; 5781; 2335; 5829; 207; 5336; 1499; 2099; 2885; 1956; 5566; 7157; 5058; 5578; 5594; 5595; 998; 4193; 4087	201	201
4.06101e-15	1.22199e-13	Platelet activation, signaling and aggregation	Reactome	R-HSA-76002	HSPA5; RAP1A; AKT1; ARRB2; ARRB1; A2M; YWHAZ; FYN; MAPK3; MAPK1; LYN; SRC; SHC1; PRKCA; VCL; PRKCD; FN1; PLCG2; VAV1; PTPN11; ALB; GRB2; LCK; CDC42	4067; 5336; 7414; 207; 2534; 6464; 5594; 213; 5578; 5580; 3309; 6714; 5906; 2335; 998; 5781; 2885; 3932; 409; 5595; 2; 7534; 408; 7409	260	260
4.70659e-15	1.3746e-13	Formation of the ternary complex, and subsequently, the 43S complex	Reactome	R-HSA-72695	RPS13; RPS11; RPS20; RPS16; RPSA; RPS27A; RPS15A; RPS7; RPS3; RPS2; RPS4X; RPS3A; RPS9; RPS8	6203; 6207; 6202; 6189; 6217; 6188; 6201; 3921; 6187; 6205; 6191; 6233; 6224; 6210	61	59
5.18028e-15	1.46972e-13	Hepatitis B - Homo sapiens (human)	KEGG	path:hsa05161	YWHAZ; SRC; DDX3X; TP53; STAT1; MAPK3; PRKCA; JUN; RB1; AKT1; CDK2; GRB2; PCNA; IKBKG; IKBKE; NFKB1; MYC; EP300; MAPK1	4609; 1654; 6714; 6772; 3725; 4790; 207; 5925; 8517; 7534; 2885; 9641; 5578; 1017; 5594; 5595; 2033; 7157; 5111	144	144
5.99282e-15	1.65302e-13	PIP3 activates AKT signaling	Reactome	R-HSA-1257604	MOV10; JUN; RPS27A; EGFR; AKT1; FYN; MAPK3; MAPK1; SRC; TRAF6; TRIM27; MDM2; CSNK2A1; TP53; ESR1; VAV1; PTPN11; UBA52; GRB2; UBB; UBC; LCK	3725; 2534; 1956; 1457; 5594; 4193; 5987; 7157; 3932; 7314; 6714; 4343; 2099; 5781; 2885; 7311; 207; 7189; 5595; 7316; 6233; 7409	213	213
7.08599e-15	1.90173e-13	Processing of Capped Intron-Containing Pre-mRNA	Reactome	R-HSA-72203	HSPA8; SF3B1; SF3B3; SF3B2; HNRNPH1; NUDT21; PRPF3; SNRNP200; U2AF2; HNRNPU; PRPF40A; HNRNPM; HNRNPC; HNRNPA2B1; DHX9; CDC5L; LSM4; HNRNPA1; SNW1; SRRM2; DDX5; YBX1; EIF4A3	3183; 3192; 4670; 4904; 23524; 10992; 988; 23020; 11051; 23451; 3181; 9129; 1655; 3178; 9775; 25804; 3312; 23450; 55660; 11338; 3187; 1660; 22938	240	240
1.25852e-14	3.28871e-13	Signaling by ERBB2	Reactome	R-HSA-1227986	SRC; SHC1; PRKCA; FYN; RPS27A; EGFR; PRKCD; AKT1; UBA52; GRB2; UBB; UBC; HSP90AA1	207; 5578; 6714; 2534; 3320; 1956; 2885; 7316; 6464; 7311; 5580; 7314; 6233	50	50
2.04642e-14	5.21049e-13	Spliceosome - Homo sapiens (human)	KEGG	path:hsa03040	SNRNP200; CDC5L; HNRNPA1; SF3B3; LSM4; SF3B1; U2AF2; TCERG1; HNRNPU; PRPF40A; SF3B2; HSPA8; DDX5; SNW1; HNRNPM; PRPF3; HNRNPC; EIF4A3	9775; 4670; 11338; 3183; 1655; 3192; 3178; 55660; 10915; 25804; 3312; 23450; 23451; 22938; 10992; 9129; 988; 23020	134	134
2.24305e-14	5.56837e-13	Prostate cancer - Homo sapiens (human)	KEGG	path:hsa05215	CTNNB1; TP53; AKT1; EGFR; HSP90B1; HSP90AB1; MAPK3; CDK2; GRB2; RB1; HSP90AA1; NFKB1; MDM2; EP300; MAPK1; IKBKG	4193; 4790; 7184; 207; 3326; 5595; 5925; 2885; 8517; 1956; 3320; 5594; 1499; 2033; 7157; 1017	97	97
2.42141e-14	5.86453e-13	Signaling by Interleukins	Reactome	R-HSA-449147	JUN; RPS27A; IKBKG; SMARCA4; YWHAZ; STAT1; MAP3K3; FYN; MAPK3; MAPK1; NFKB1; LYN; DHX9; SHC1; TRAF6; VAV1; PTPN11; UBA52; GRB2; PRKACA; UBB; UBC; LCK	4067; 2885; 6464; 5594; 4790; 6772; 5566; 6597; 2534; 3932; 5781; 8517; 4215; 7311; 7314; 7189; 5595; 1660; 7316; 7534; 6233; 3725; 7409	254	254
2.55314e-14	6.03636e-13	Ribosomal scanning and start codon recognition	Reactome	R-HSA-72702	RPS13; RPS11; RPS20; RPS16; RPSA; RPS27A; RPS15A; RPS7; RPS3A; RPS2; RPS4X; RPS3; RPS9; RPS8	6203; 6207; 6205; 6202; 6189; 6217; 6188; 6201; 3921; 6187; 6191; 6233; 6224; 6210	68	66
5.30724e-14	1.2256e-12	Signaling by EGFR	Reactome	R-HSA-177929	SRC; SHC1; PTPN11; RPS27A; EGFR; HGS; UBA52; GRB2; PXN; UBB; UBC; CDC42	1956; 5781; 9146; 5829; 7316; 6464; 7311; 2885; 998; 6714; 7314; 6233	43	43
7.34667e-14	1.65801e-12	Pathways in cancer - Homo sapiens (human)	KEGG	path:hsa05200	EGFR; HSP90B1; CTNNB1; PLCG2; IKBKG; ABL1; STAT1; JUN; RB1; HSP90AB1; MAPK3; MAPK1; AKT1; NFKB1; MYC; VHL; TRAF6; PRKCA; SP1; SMAD2; APC; MDM2; EP300; TP53; FN1; ESR1; CDK2; GRB2; PRKACA; HSP90AA1; CDC42	25; 2099; 4193; 2335; 324; 8517; 4609; 6667; 6772; 4790; 1499; 2885; 998; 7157; 1017; 7184; 7189; 5336; 207; 3320; 5566; 5578; 5594; 5595; 3326; 7428; 3725; 5925; 1956; 4087; 2033	526	526
1.68868e-13	3.72636e-12	Transcriptional regulation by RUNX2	Reactome	R-HSA-8878166	SRC; NR3C1; STAT1; ESR1; RPS27A; RB1; AKT1; UBA52; MAPK1; UBB; UBC; ABL1; MAPK3; CDK1	207; 2908; 5925; 983; 6714; 2099; 5595; 25; 7316; 6772; 7311; 5594; 7314; 6233	75	75
1.89269e-13	4.08574e-12	Focal adhesion - Homo sapiens (human)	KEGG	path:hsa04510	SRC; PAK1; SHC1; FN1; MAPK3; VAV1; FYN; JUN; ILK; RAP1A; EGFR; CTNNB1; AKT1; GRB2; PRKCA; PXN; MAPK1; ACTB; VCL; CDC42	3611; 2534; 6714; 60; 3725; 2335; 5829; 5906; 207; 7409; 7414; 6464; 998; 2885; 1956; 5058; 5578; 5594; 1499; 5595	199	199
2.08223e-13	4.39927e-12	MAPK1/MAPK3 signaling	Reactome	R-HSA-5684996	SRC; RPS27A; SHC1; FN1; MAPK3; PHB; PTPN11; UBC; FYN; RAP1A; GRB2; CDK1; UBA52; MAPK1; ARRB2; UBB; ARRB1; EGFR; VCL; SPTBN1	409; 983; 408; 5594; 6711; 6714; 5906; 2335; 2534; 5245; 1956; 5781; 2885; 7311; 7414; 7314; 6464; 5595; 7316; 6233	201	200
2.83983e-13	5.87489e-12	Innate Immune System	Reactome	R-HSA-168249	SRC; HLA-B; HSPA8; HSP90B1; PRKDC; CTNNB1; PLCG2; IKBKG; IKBKE; ABL1; KPNB1; XRCC6; JUN; HSP90AB1; MAPK3; MAPK1; EEF1A1; NFKB1; LYN; DHX9; RPS27A; DDX3X; SHC1; TRAF6; FYN; VCL; PRKCD; RAP1A; EP300; NCK1; VAV1; PTPN11; TUBB; PAK1; UBA52; GRB2; PRKACA; UBB; UBC; HSP90AA1; ACTB; LCK; CDC42	5336; 1654; 998; 3312; 2885; 3106; 1499; 1660; 7316; 9641; 2033; 3326; 4690; 7184; 5906; 60; 3932; 7311; 7189; 3320; 3725; 5591; 5580; 4790; 2534; 25; 7314; 6714; 1915; 7409; 6233; 4067; 5058; 2547; 6464; 5594; 3837; 5566; 5595; 5781; 8517; 7414; 203068	1077	1065
5.35094e-13	1.08438e-11	Chemokine signaling pathway - Homo sapiens (human)	KEGG	path:hsa04062	SRC; MAPK3; SHC1; STAT1; PXN; VAV1; PRKCD; RAP1A; AKT1; GRB2; ARRB2; IKBKG; ARRB1; NFKB1; LYN; CDC42; PAK1; MAPK1; PRKACA	6714; 207; 6772; 4790; 7409; 5906; 6464; 2885; 408; 409; 8517; 5566; 5058; 5580; 5829; 5594; 5595; 4067; 998	185	185
5.90068e-13	1.17188e-11	Kaposi,s sarcoma-associated herpesvirus infection - Homo sapiens (human)	KEGG	path:hsa05167	SRC; LYN; TP53; STAT1; PLCG2; HLA-B; TNFRSF1A; JUN; RB1; CTNNB1; AKT1; MAPK1; IKBKG; UBB; IKBKE; NFKB1; MYC; EP300; MAPK3	4609; 3106; 6714; 6772; 3725; 7314; 4790; 207; 5336; 5595; 5925; 8517; 4067; 9641; 5594; 7132; 1499; 2033; 7157	186	186
6.10143e-13	1.18799e-11	Neurotrophin signaling pathway - Homo sapiens (human)	KEGG	path:hsa04722	TP53; SHC1; TRAF6; PLCG2; MAP3K3; PTPN11; JUN; PRKCD; RAP1A; AKT1; GRB2; ABL1; NFKB1; MAPK3; MAPK1; CDC42	7189; 25; 4215; 3725; 5781; 4790; 207; 5336; 5906; 6464; 2885; 7157; 5580; 5594; 5595; 998	119	119
8.4897e-13	1.62121e-11	Signal Transduction	Reactome	R-HSA-162582	MYH10; MOV10; JUN; RPS27A; EGFR; RAP1A; CTNNB1; AKT1; HNRNPH1; IKBKG; CLTC; ARRB1; ABL1; HGS; SMARCA4; A2M; SPTBN1; YWHAZ; STAT1; CDK1; MYH9; FYN; UBA52; HSP90AA1; HSP90AB1; MAPK3; MAPK1; HNRNPM; NFKB1; MYC; YWHAG; PXN; SRC; NR3C1; HNRNPA1; SHC1; TRAF6; PRKCA; SP1; TRIM27; VCL; PARP1; PRKCD; SMAD2; APC; MDM2; EP300; LYN; CSNK2A1; SNW1; TP53; NCK1; FN1; TNFRSF1A; VAV1; PHB; PTPN11; ESR1; LCK; DDX5…	4193; 7132; 4087; 2534; 5906; 2033; 5058; 409; 7409; 4790; 7314; 6233; 3187; 1956; 7532; 8517; 142; 408; 6714; 2885; 22938; 7316; 1017; 3326; 6772; 4690; 1655; 324; 4627; 4609; 4670; 5594; 1457; 6597; 2335; 2; 983; 3932; 5245; 7311; 7189; 3320; 3725; 998; 5987; 7157; 25; 3178; 207; 4628; 6464; 6711; 5566; 5781; 5578; 1499; 5829; 5595; 6667; 60; 1213; 5580; 4067; 4904; 7534; 4343; 2099; 2908; 9146…	2643	2629
9.02133e-13	1.69022e-11	Developmental Biology	Reactome	R-HSA-1266738	MYH10; HSPA8; EGFR; SMAD2; CTNNB1; AKT1; CLTC; ABL1; SPTBN1; MYH9; FYN; HSP90AB1; MAPK3; MAPK1; LYN; SRC; RPS27A; SHC1; PRKCA; EP300; CSNK2A1; NCK1; PTPN11; UBA52; GRB2; PRKACA; UBB; UBC; HSP90AA1; ACTB; PAK1; CDC42	207; 4690; 5578; 1457; 6714; 2885; 1499; 4087; 7316; 5058; 5595; 2534; 3326; 2033; 60; 7311; 3312; 3320; 1213; 4067; 998; 25; 4627; 7314; 6233; 1956; 4628; 6464; 5594; 6711; 5566; 5781	618	617
1.03463e-12	1.90256e-11	ErbB signaling pathway - Homo sapiens (human)	KEGG	path:hsa04012	SRC; MAPK3; SHC1; PLCG2; PRKCA; JUN; EGFR; AKT1; GRB2; ABL1; MAPK1; MYC; PAK1; NCK1	4609; 3725; 2885; 25; 1956; 6714; 6464; 5058; 5578; 207; 4690; 5336; 5594; 5595	85	85
2.02038e-12	3.6477e-11	Oncogene Induced Senescence	Reactome	R-HSA-2559585	TP53; SP1; RPS27A; MAPK3; UBA52; MAPK1; UBB; UBC; MOV10; MDM2	7157; 5594; 5595; 6667; 4343; 7316; 7311; 4193; 7314; 6233	32	32
2.42553e-12	4.30099e-11	Signaling by FGFR2	Reactome	R-HSA-5654738	SRC; RPS27A; SHC1; PTPN11; HNRNPA1; MAPK3; UBA52; GRB2; HNRNPH1; HNRNPM; UBB; UBC; MAPK1	6464; 5781; 6714; 5595; 3187; 2885; 3178; 7316; 7311; 5594; 4670; 7314; 6233	73	73
3.73794e-12	6.51189e-11	Cytokine Signaling in Immune system	Reactome	R-HSA-1280215	HLA-B; RPS27A; IKBKG; SMARCA4; YWHAZ; STAT1; MAP3K3; FYN; MAPK3; MAPK1; NFKB1; LYN; DHX9; SHC1; TRAF6; PRKCD; JUN; TNFRSF1A; VAV1; PTPN11; UBA52; GRB2; PRKACA; UBB; UBC; LCK; EIF4A3	3106; 7132; 6597; 2885; 5595; 1660; 7316; 2534; 6772; 3932; 7311; 7189; 7409; 3725; 5580; 4790; 4215; 7314; 6233; 4067; 6464; 5594; 5566; 5781; 8517; 9775; 7534	458	458
4.16575e-12	7.13205e-11	Chronic myeloid leukemia - Homo sapiens (human)	KEGG	path:hsa05220	TP53; SHC1; MAPK3; PTPN11; RB1; AKT1; GRB2; IKBKG; ABL1; NFKB1; MYC; MDM2; MAPK1	4609; 5781; 25; 2885; 5925; 4790; 6464; 8517; 207; 5594; 5595; 4193; 7157	76	76
4.99781e-12	8.41157e-11	Estrogen signaling pathway - Homo sapiens (human)	KEGG	path:hsa04915	SRC; SHC1; ESR1; SP1; HSPA8; JUN; PRKCD; HSP90B1; HSP90AB1; AKT1; GRB2; PRKACA; HSP90AA1; EGFR; MAPK3; MAPK1	6667; 7184; 2099; 6714; 3725; 207; 3312; 3326; 6464; 2885; 1956; 5566; 5580; 3320; 5594; 5595	137	136
5.95877e-12	9.86176e-11	Thyroid hormone signaling pathway - Homo sapiens (human)	KEGG	path:hsa04919	SRC; MAPK3; TP53; ACTB; STAT1; ESR1; PRKCA; PLCG2; AKT1; CTNNB1; MAPK1; PRKACA; MYC; EP300; MDM2	4609; 2099; 6714; 4193; 6772; 207; 5336; 1499; 60; 5566; 5578; 5594; 5595; 2033; 7157	116	116
1.28509e-11	2.09126e-10	RAF/MAP kinase cascade	Reactome	R-HSA-5673001	ARRB1; SRC; RPS27A; SHC1; FN1; FYN; UBC; EGFR; RAP1A; GRB2; MAPK3; UBA52; MAPK1; ARRB2; UBB; PHB; VCL; SPTBN1	409; 1956; 5594; 6711; 6714; 5906; 2335; 2534; 5245; 2885; 7311; 7414; 7314; 6464; 5595; 7316; 408; 6233	195	194
1.30572e-11	2.09126e-10	Cell Cycle	Reactome	R-HSA-1640170	BRCA1; RPS27A; AKT1; ABL1; MDM2; YWHAZ; UBA52; RB1; HSP90AB1; MAPK3; MAPK1; MYC; YWHAG; PCNA; SRC; PRKCA; LMNA; EP300; NPM1; LYN; CSNK2A1; TP53; TUBB; CDK1; CDK2; PRKACA; UBB; UBC; HSP90AA1	5925; 5578; 207; 1457; 4869; 4000; 6714; 5595; 7316; 983; 3326; 2033; 7311; 3320; 1017; 7157; 25; 7314; 5111; 672; 4609; 6233; 4067; 5594; 7532; 5566; 4193; 7534; 203068	561	560
1.37251e-11	2.12896e-10	Cytosolic sensors of pathogen-associated DNA	Reactome	R-HSA-1834949	DHX9; RPS27A; PRKDC; CTNNB1; UBA52; IKBKG; UBB; UBC; NFKB1; EP300; XRCC6	5591; 1499; 2547; 8517; 4790; 1660; 7316; 7311; 7314; 6233; 2033	51	51
1.37251e-11	2.12896e-10	Transcriptional regulation by RUNX3	Reactome	R-HSA-8878159	SRC; SNW1; TP53; RPS27A; CTNNB1; UBA52; UBB; UBC; MDM2; EP300; MYC	7157; 22938; 7311; 6714; 7316; 2033; 4193; 4609; 7314; 6233; 1499	52	51
1.39358e-11	2.12896e-10	Ovarian tumor domain proteases	Reactome	R-HSA-5689896	TP53; TRAF6; ESR1; RPS27A; CDK1; UBA52; IKBKG; UBB; UBC; APC	7157; 983; 7189; 2099; 8517; 7316; 7311; 324; 7314; 6233	38	38
1.78756e-11	2.68947e-10	C-type lectin receptor signaling pathway - Homo sapiens (human)	KEGG	path:hsa04625	SRC; MAPK3; STAT1; PLCG2; PTPN11; JUN; PRKCD; AKT1; MAPK1; IKBKG; IKBKE; NFKB1; MDM2; PAK1	6714; 4193; 6772; 3725; 5781; 4790; 207; 5336; 8517; 9641; 5058; 5580; 5594; 5595	104	104
1.85532e-11	2.74975e-10	MAPK6/MAPK4 signaling	Reactome	R-HSA-5687128	RPS27A; JUN; CDK1; UBA52; PRKACA; UBB; UBC; MYC; PAK1; CDC42	3725; 7314; 983; 5566; 7316; 7311; 4609; 6233; 998; 5058	39	39
2.15273e-11	3.14362e-10	keratinocyte differentiation	BioCarta	keratinocytepathway	SHC1; TNFRSF1A; PRKCA; JUN; EGFR; PRKCD; MAPK3; GRB2; IKBKG; SP1; MAPK1	3725; 5578; 7132; 5595; 8517; 1956; 2885; 6667; 6464; 5594; 5580	53	53
2.23336e-11	3.21409e-10	Human papillomavirus infection - Homo sapiens (human)	KEGG	path:hsa05165	HLA-B; EGFR; CTNNB1; AKT1; IKBKG; IKBKE; STAT1; RB1; MAPK3; MAPK1; PXN; NFKB1; MDM2; EP300; TP53; FN1; TNFRSF1A; CDK2; GRB2; PRKACA; APC; CDC42	3106; 4193; 6772; 4790; 5829; 207; 2335; 5595; 5925; 324; 8517; 1956; 9641; 5566; 2885; 5594; 1499; 7132; 998; 2033; 7157; 1017	319	319
2.44894e-11	3.474e-10	Signaling by FGFR3	Reactome	R-HSA-5654741	SRC; SHC1; PTPN11; RPS27A; MAPK3; UBA52; GRB2; UBB; UBC; MAPK1	5781; 6714; 5595; 2885; 7316; 6464; 7311; 5594; 7314; 6233	40	40
2.49759e-11	3.49311e-10	Signaling by FGFR	Reactome	R-HSA-190236	SRC; RPS27A; SHC1; GRB2; PTPN11; HNRNPA1; MAPK3; UBA52; MAPK1; HNRNPH1; HNRNPM; UBB; UBC	4670; 6464; 5594; 6714; 5781; 7314; 2885; 3178; 7311; 5595; 3187; 7316; 6233	87	87
2.88068e-11	3.97294e-10	Negative regulation of FGFR3 signaling	Reactome	R-HSA-5654732	SRC; PTPN11; RPS27A; MAPK3; UBA52; GRB2; UBB; UBC; MAPK1	5781; 6714; 5595; 2885; 7316; 7311; 5594; 7314; 6233	29	29
3.20643e-11	4.36163e-10	Signaling by FGFR4	Reactome	R-HSA-5654743	SRC; SHC1; PTPN11; RPS27A; MAPK3; UBA52; GRB2; UBB; UBC; MAPK1	5781; 6714; 5595; 2885; 7316; 6464; 7311; 5594; 7314; 6233	41	41
3.66147e-11	4.9133e-10	MAPK signaling pathway - Homo sapiens (human)	KEGG	path:hsa04010	PRKACA; TNFRSF1A; TP53; TRAF6; MAPK3; PRKCA; MAP3K3; HSPA8; JUN; RAP1A; AKT1; GRB2; ARRB2; IKBKG; ARRB1; NFKB1; MYC; CDC42; PAK1; MAPK1; EGFR	409; 4609; 4215; 5906; 7189; 3725; 4790; 3312; 2885; 408; 207; 1956; 5566; 5058; 8517; 5578; 5594; 5595; 7132; 998; 7157	295	295
3.96557e-11	5.25042e-10	Adherens junction - Homo sapiens (human)	KEGG	path:hsa04520	SRC; FYN; EGFR; SMAD2; CTNNB1; MAPK3; MAPK1; ACTB; EP300; VCL; CSNK2A1; CDC42	5594; 6714; 1956; 2033; 1457; 60; 4087; 1499; 5595; 2534; 998; 7414	72	72
4.50727e-11	5.88911e-10	Regulation of RUNX3 expression and activity	Reactome	R-HSA-8941858	SRC; RPS27A; UBA52; UBB; UBC; MDM2; EP300	7316; 7311; 6714; 4193; 7314; 6233; 2033	13	13
5.18135e-11	6.68193e-10	VEGFA-VEGFR2 Pathway	Reactome	R-HSA-4420097	SRC; NCK1; PRKCA; VAV1; FYN; PRKCD; CTNNB1; AKT1; PRKACA; PXN; HSP90AA1; PAK1; CDC42	207; 3320; 5578; 2534; 5580; 6714; 4690; 5566; 998; 5058; 1499; 5829; 7409	92	92
5.6834e-11	7.2354e-10	Negative regulation of FGFR4 signaling	Reactome	R-HSA-5654733	SRC; PTPN11; RPS27A; MAPK3; UBA52; GRB2; UBB; UBC; MAPK1	5781; 6714; 5595; 2885; 7316; 7311; 5594; 7314; 6233	31	31
8.92569e-11	1.12193e-09	Spry regulation of FGF signaling	Reactome	R-HSA-1295596	SRC; PTPN11; RPS27A; UBA52; GRB2; UBB; UBC	7316; 5781; 7311; 6714; 7314; 6233; 2885	14	14
9.6917e-11	1.20298e-09	Cellular responses to stress	Reactome	R-HSA-2262752	MOV10; HSPA5; EEF1A1; RPS27A; VHL; JUN; CDK2; RB1; HSP90AB1; MAPK3; MAPK1; NFKB1; NR3C1; HSPA8; SP1; MDM2; EP300; TP53; UBA52; UBB; UBC; HSP90AA1	5925; 4193; 3312; 5595; 7316; 2033; 1017; 6667; 3326; 2908; 7311; 3320; 3725; 7157; 4790; 7314; 1915; 6233; 5594; 3309; 4343; 7428	345	344
1.03225e-10	1.25972e-09	Immune System	Reactome	R-HSA-168256	HSPA5; SRC; HLA-B; RPS27A; RAP1A; PRKDC; CTNNB1; PLCG2; IKBKG; CLTC; IKBKE; ABL1; SMARCA4; XRCC6; YWHAZ; STAT1; MAP3K3; FYN; HSP90AB1; MAPK3; MAPK1; AKT1; EEF1A1; NFKB1; LYN; VHL; DHX9; HSPA8; DDX3X; SHC1; TRAF6; KPNB1; VCL; PRKCD; JUN; HSP90B1; EP300; NCK1; TNFRSF1A; VAV1; PTPN11; TUBB; LCK; UBA52; GRB2; PRKACA; UBB; UBC; HSP90AA1; ACTB; PAK1; EIF4A3; CDC42	207; 7132; 3106; 1660; 2534; 5906; 7409; 4790; 7314; 6233; 2547; 3309; 8517; 5336; 6714; 2885; 5595; 7316; 3326; 6772; 4690; 7184; 5594; 4215; 7534; 1654; 203068; 6597; 2033; 5058; 3932; 7311; 7189; 3320; 3725; 998; 9641; 25; 1915; 6464; 3837; 5566; 5781; 9775; 3312; 1499; 60; 1213; 5591; 5580; 4067; 7428; 7414	1840	1827
1.06563e-10	1.25972e-09	role of egf receptor transactivation by gpcrs in cardiac hypertrophy	BioCarta	cardiacegfpathway	SHC1; PRKCA; JUN; EGFR; MAPK3; GRB2; IKBKG; MAPK1; MYC	3725; 5578; 2885; 5595; 1956; 8517; 6464; 5594; 4609	33	33
1.06563e-10	1.25972e-09	CD28 co-stimulation	Reactome	R-HSA-389356	SRC; VAV1; FYN; PAK1; AKT1; GRB2; LYN; LCK; CDC42	4067; 207; 3932; 6714; 2534; 2885; 7409; 998; 5058	33	33
1.06563e-10	1.25972e-09	Negative regulation of FGFR1 signaling	Reactome	R-HSA-5654726	SRC; PTPN11; RPS27A; MAPK3; UBA52; GRB2; UBB; UBC; MAPK1	5781; 6714; 5595; 2885; 7316; 7311; 5594; 7314; 6233	33	33
1.14258e-10	1.3348e-09	Signaling by NOTCH	Reactome	R-HSA-157118	SNW1; TP53; UBC; STAT1; RPS27A; EGFR; UBA52; ARRB2; UBB; ARRB1; MOV10; MYC; EP300; YBX1	1956; 4904; 408; 7157; 7314; 6772; 4343; 2033; 7311; 4609; 22938; 6233; 409; 7316	120	119
1.27585e-10	1.47317e-09	Hepatocellular carcinoma - Homo sapiens (human)	KEGG	path:hsa05225	MAPK3; TP53; SHC1; PLCG2; PRKCA; EGFR; RB1; CTNNB1; AKT1; GRB2; SMAD2; APC; MYC; SMARCA4; ACTB; MAPK1	4609; 207; 5336; 60; 1499; 5925; 6464; 324; 2885; 1956; 6597; 5578; 5594; 5595; 7157; 4087	168	168
1.43476e-10	1.63761e-09	Negative regulation of FGFR2 signaling	Reactome	R-HSA-5654727	SRC; PTPN11; RPS27A; MAPK3; UBA52; GRB2; UBB; UBC; MAPK1	5781; 6714; 5595; 2885; 7316; 7311; 5594; 7314; 6233	34	34
1.52194e-10	1.71737e-09	Signaling by VEGF	Reactome	R-HSA-194138	SRC; NCK1; PRKCA; VAV1; FYN; PRKCD; CTNNB1; AKT1; PRKACA; PXN; HSP90AA1; PAK1; CDC42	207; 3320; 5578; 2534; 5580; 6714; 4690; 5566; 998; 5058; 1499; 5829; 7409	100	100
1.72922e-10	1.88694e-09	TRIF(TICAM1)-mediated TLR4 signaling	Reactome	R-HSA-937061	DHX9; RPS27A; TRAF6; PTPN11; UBC; JUN; MAPK3; UBA52; MAPK1; IKBKG; UBB; IKBKE; NFKB1	3725; 5594; 4790; 9641; 5781; 8517; 7311; 7314; 7189; 5595; 1660; 7316; 6233	101	101
1.72922e-10	1.88694e-09	MyD88-independent TLR4 cascade	Reactome	R-HSA-166166	DHX9; RPS27A; TRAF6; PTPN11; UBC; JUN; MAPK3; UBA52; MAPK1; IKBKG; UBB; IKBKE; NFKB1	3725; 5594; 4790; 9641; 5781; 8517; 7311; 7314; 7189; 5595; 1660; 7316; 6233	101	101
1.72922e-10	1.88694e-09	T cell receptor signaling pathway - Homo sapiens (human)	KEGG	path:hsa04660	NCK1; MAPK3; VAV1; FYN; JUN; PAK1; AKT1; GRB2; IKBKG; NFKB1; LCK; MAPK1; CDC42	4690; 2885; 3725; 4790; 207; 7409; 8517; 3932; 2534; 5058; 5594; 5595; 998	101	101
1.87089e-10	2.01934e-09	Breast cancer - Homo sapiens (human)	KEGG	path:hsa05224	BRCA1; TP53; SHC1; ESR1; SP1; JUN; RB1; CTNNB1; AKT1; GRB2; APC; MYC; MAPK3; MAPK1; EGFR	4609; 6667; 2099; 3725; 207; 1499; 5925; 6464; 324; 2885; 1956; 672; 5594; 5595; 7157	147	147
1.9121e-10	2.04163e-09	angiotensin ii mediated activation of jnk pathway via pyk2 dependent signaling	BioCarta	at1rpathway	SRC; SHC1; PRKCA; JUN; EGFR; MAPK3; GRB2; MAPK1; PAK1	3725; 5578; 6714; 5595; 1956; 2885; 6464; 5594; 5058	35	35
2.51468e-10	2.61075e-09	Mitotic G1-G1/S phases	Reactome	R-HSA-453279	PCNA; SRC; CDK1; RPS27A; UBA52; RB1; AKT1; CDK2; UBB; UBC; ABL1; LYN; MYC	4067; 207; 5925; 983; 1017; 6714; 25; 7311; 7314; 5111; 7316; 4609; 6233	104	104
2.52399e-10	2.61075e-09	Signaling by RAS mutants	Reactome	R-HSA-6802949	SRC; FN1; PHB; VCL; RAP1A; MAPK3; MAPK1; ARRB2; ARRB1	5245; 7414; 6714; 5595; 5594; 409; 408; 5906; 2335	36	36
2.52399e-10	2.61075e-09	Regulation of TP53 Degradation	Reactome	R-HSA-6804757	TP53; CDK1; RPS27A; UBA52; AKT1; CDK2; UBB; UBC; MDM2	7157; 207; 1017; 983; 7316; 7311; 4193; 7314; 6233	36	36
2.68311e-10	2.74673e-09	Signaling by FGFR1	Reactome	R-HSA-5654736	SRC; SHC1; PTPN11; RPS27A; MAPK3; UBA52; GRB2; UBB; UBC; MAPK1	6714; 5595; 2885; 7316; 6464; 7311; 5594; 5781; 7314; 6233	50	50
2.76058e-10	2.7972e-09	Toll Like Receptor 4 (TLR4) Cascade	Reactome	R-HSA-166016	DHX9; RPS27A; TRAF6; MAPK3; PTPN11; UBC; JUN; PLCG2; UBA52; MAPK1; IKBKG; UBB; IKBKE; NFKB1	3725; 5336; 5594; 4790; 9641; 5781; 8517; 7311; 7314; 7189; 5595; 1660; 7316; 6233	127	127
2.86704e-10	2.87573e-09	EGFR downregulation	Reactome	R-HSA-182971	RPS27A; EGFR; HGS; UBA52; GRB2; UBB; UBC; CDC42	9146; 998; 1956; 2885; 7316; 7311; 7314; 6233	25	25
3.30193e-10	3.26282e-09	Regulation of TP53 Expression and Degradation	Reactome	R-HSA-6806003	TP53; CDK1; RPS27A; UBA52; AKT1; CDK2; UBB; UBC; MDM2	7157; 207; 1017; 983; 7316; 7311; 4193; 7314; 6233	37	37
3.31868e-10	3.26282e-09	Cell Cycle, Mitotic	Reactome	R-HSA-69278	RPS27A; AKT1; ABL1; CDK2; RB1; HSP90AB1; MAPK3; MAPK1; LYN; YWHAG; PCNA; SRC; PRKCA; LMNA; EP300; MYC; CSNK2A1; TP53; TUBB; CDK1; UBA52; PRKACA; UBB; UBC; HSP90AA1	5925; 5578; 207; 1457; 4000; 6714; 5595; 7316; 1017; 983; 3326; 2033; 7311; 3320; 7157; 25; 7314; 5111; 4609; 6233; 4067; 5594; 7532; 5566; 203068	479	478
3.62685e-10	3.53084e-09	Toll-Like Receptors Cascades	Reactome	R-HSA-168898	DHX9; RPS27A; TRAF6; MAPK3; PTPN11; UBC; JUN; HSP90B1; PLCG2; UBA52; MAPK1; IKBKG; UBB; IKBKE; NFKB1	5336; 3725; 5594; 4790; 7184; 9641; 5781; 8517; 7311; 7314; 7189; 5595; 1660; 7316; 6233	154	154
3.78033e-10	3.64453e-09	Relaxin signaling pathway - Homo sapiens (human)	KEGG	path:hsa04926	SRC; SHC1; MAPK3; PRKCA; EGFR; JUN; SMAD2; AKT1; GRB2; ARRB2; ARRB1; NFKB1; MAPK1; PRKACA	6714; 4790; 207; 6464; 2885; 3725; 408; 409; 1956; 5566; 5578; 5594; 5595; 4087	130	130
4.10012e-10	3.91483e-09	links between pyk2 and map kinases	BioCarta	pyk2pathway	SRC; SHC1; PRKCA; JUN; MAPK3; GRB2; MAPK1; PAK1	3725; 5578; 6714; 5595; 2885; 6464; 5594; 5058	26	26
4.28342e-10	4.01267e-09	Paradoxical activation of RAF signaling by kinase inactive BRAF	Reactome	R-HSA-6802955	SRC; FN1; PHB; VCL; RAP1A; MAPK3; MAPK1; ARRB2; ARRB1	5245; 6714; 5595; 5594; 409; 408; 7414; 5906; 2335	38	38
4.28342e-10	4.01267e-09	Signaling by moderate kinase activity BRAF mutants	Reactome	R-HSA-6802946	SRC; FN1; PHB; VCL; RAP1A; MAPK3; MAPK1; ARRB2; ARRB1	5245; 7414; 6714; 5595; 5594; 409; 408; 5906; 2335	38	38
4.38228e-10	4.06692e-09	Renal cell carcinoma - Homo sapiens (human)	KEGG	path:hsa05211	MAPK3; AKT1; PTPN11; JUN; RAP1A; VHL; GRB2; MAPK1; EP300; PAK1; CDC42	7428; 5781; 3725; 5906; 2033; 5058; 2885; 207; 5594; 5595; 998	69	69
4.65159e-10	4.27688e-09	RNA Polymerase II Transcription	Reactome	R-HSA-73857	BRCA1; MOV10; SSRP1; RPS27A; EGFR; SMAD2; CTNNB1; AKT1; ABL1; NUDT21; SMARCA4; YWHAZ; STAT1; HSPD1; U2AF2; JUN; CDK2; RB1; MAPK3; MAPK1; MYC; YWHAG; PCNA; SRC; NR3C1; SP1; PARP1; MDM2; EP300; NPM1; CSNK2A1; UBE2I; SNW1; TP53; ESR1; PTPN11; CDK1; UBA52; UBB; UBC; EIF4A3	5925; 207; 1457; 4193; 4869; 6714; 6597; 22938; 11338; 5595; 7316; 983; 6667; 4087; 6772; 5781; 11051; 2033; 7311; 142; 3725; 7157; 1017; 7329; 25; 3329; 7314; 6749; 2099; 1499; 5111; 672; 4609; 6233; 1956; 5594; 7532; 2908; 9775; 7534; 4343	1235	1227
6.0295e-10	5.49293e-09	Glioma - Homo sapiens (human)	KEGG	path:hsa05214	TP53; SHC1; PLCG2; PRKCA; EGFR; RB1; AKT1; GRB2; MAPK1; MDM2; MAPK3	6464; 2885; 5578; 207; 5336; 1956; 5594; 5595; 5925; 4193; 7157	71	71
7.26421e-10	6.5576e-09	Pathogenic Escherichia coli infection - Homo sapiens (human)	KEGG	path:hsa05130	YWHAZ; NCK1; PRKCA; FYN; TUBB; CTNNB1; NCL; ABL1; ACTB; CDC42	25; 1499; 203068; 5578; 60; 4690; 4691; 998; 2534; 7534	55	55
7.99573e-10	7.15294e-09	role of erbb2 in signal transduction and oncology	BioCarta	her2pathway	SHC1; MAPK3; ESR1; EGFR; AKT1; GRB2; MAPK1; EP300	207; 5595; 1956; 2885; 6464; 5594; 2099; 2033	28	28
9.06027e-10	8.0329e-09	Generic Transcription Pathway	Reactome	R-HSA-212436	BRCA1; MOV10; SSRP1; RPS27A; EGFR; SMAD2; CTNNB1; AKT1; ABL1; SMARCA4; YWHAZ; STAT1; MAPK3; JUN; UBA52; RB1; HSPD1; MAPK1; MYC; YWHAG; PCNA; SRC; NR3C1; SP1; PARP1; MDM2; EP300; NPM1; CSNK2A1; UBE2I; SNW1; TP53; ESR1; PTPN11; CDK1; CDK2; UBB; UBC	5925; 207; 1457; 4193; 4869; 6714; 6597; 22938; 1499; 7316; 983; 6667; 4087; 6772; 2033; 7311; 3725; 4343; 1017; 7157; 7329; 25; 3329; 7314; 6749; 2099; 5111; 672; 4609; 6233; 1956; 5594; 7532; 2908; 5595; 5781; 142; 7534	1106	1098
9.26998e-10	8.1461e-09	Gene expression (Transcription)	Reactome	R-HSA-74160	PCNA; MOV10; SSRP1; RPS27A; EGFR; SMAD2; CTNNB1; AKT1; ABL1; NUDT21; SMARCA4; YWHAZ; STAT1; HSPD1; U2AF2; JUN; UBA52; RB1; MAPK3; MAPK1; SP1; MYC; YWHAG; BRCA1; SRC; NR3C1; SF3B1; PARP1; MDM2; EP300; NPM1; CSNK2A1; UBE2I; SNW1; TP53; ESR1; PTPN11; CDK1; CDK2; UBB; UBC; ACTB; EIF4A3	207; 5925; 4193; 11338; 4087; 2033; 7314; 6233; 1956; 7532; 672; 6714; 22938; 5595; 7316; 1017; 6772; 5781; 142; 6749; 4609; 5594; 7534; 1457; 6597; 983; 7311; 3725; 7157; 7329; 25; 5111; 9775; 4869; 23451; 2099; 1499; 6667; 11051; 60; 3329; 4343; 2908	1372	1363
1.0932e-09	9.52233e-09	Cyclin E associated events during G1/S transition	Reactome	R-HSA-69202	RPS27A; CDK2; RB1; AKT1; UBA52; UBB; UBC; MYC	207; 5925; 7316; 7311; 1017; 4609; 7314; 6233	29	29
1.10776e-09	9.56523e-09	Pancreatic cancer - Homo sapiens (human)	KEGG	path:hsa05212	TP53; STAT1; RB1; EGFR; SMAD2; AKT1; MAPK1; IKBKG; NFKB1; MAPK3; CDC42	1956; 5925; 4790; 8517; 207; 4087; 5594; 5595; 998; 6772; 7157	75	75
1.16813e-09	9.9996e-09	HTLV-I infection - Homo sapiens (human)	KEGG	path:hsa05166	PCNA; TP53; APC; HLA-B; TNFRSF1A; JUN; RB1; CTNNB1; AKT1; SMAD2; PRKACA; SLC25A5; MAP3K3; NFKB1; MYC; EP300; LCK; IKBKG	4609; 3106; 5566; 4215; 3725; 2033; 4790; 207; 5925; 292; 324; 8517; 3932; 4087; 7157; 7132; 1499; 5111	255	255
1.24715e-09	1.03825e-08	Regulation of TP53 Activity through Methylation	Reactome	R-HSA-6804760	TP53; RPS27A; UBA52; UBB; UBC; MDM2; EP300	7316; 7311; 4193; 7314; 6233; 7157; 2033	19	19
1.24715e-09	1.03825e-08	Listeria monocytogenes entry into host cells	Reactome	R-HSA-8876384	RPS27A; HGS; CTNNB1; UBA52; GRB2; UBB; UBC	7316; 7311; 9146; 1499; 7314; 2885; 6233	19	19
1.25733e-09	1.03825e-08	Endometrial cancer - Homo sapiens (human)	KEGG	path:hsa05213	TP53; MAPK3; EGFR; ILK; CTNNB1; AKT1; GRB2; APC; MYC; MAPK1	4609; 324; 3611; 1499; 1956; 2885; 207; 5594; 5595; 7157	58	58
1.26513e-09	1.03825e-08	PI5P, PP2A and IER3 Regulate PI3K/AKT Signaling	Reactome	R-HSA-6811558	SRC; MAPK3; TRAF6; ESR1; VAV1; FYN; PTPN11; EGFR; GRB2; AKT1; MAPK1; LCK	207; 2534; 1956; 5594; 6714; 5781; 2099; 3932; 2885; 7189; 5595; 7409	96	96
1.26513e-09	1.03825e-08	PTEN Regulation	Reactome	R-HSA-6807070	RPS27A; TP53; MAPK3; TRIM27; JUN; AKT1; UBA52; MAPK1; UBB; UBC; MOV10; CSNK2A1	207; 3725; 1457; 5594; 5987; 7157; 7314; 4343; 7311; 5595; 7316; 6233	96	96
1.40922e-09	1.14701e-08	Signaling by SCF-KIT	Reactome	R-HSA-1433557	SRC; STAT1; PRKCA; PTPN11; FYN; VAV1; GRB2; LYN; LCK	4067; 5578; 3932; 6772; 5781; 2534; 6714; 2885; 7409	43	43
1.42922e-09	1.15384e-08	Toll Like Receptor 3 (TLR3) Cascade	Reactome	R-HSA-168164	DHX9; RPS27A; TRAF6; UBC; JUN; MAPK3; UBA52; MAPK1; IKBKG; UBB; IKBKE; NFKB1	3725; 5594; 4790; 9641; 8517; 7311; 7314; 7189; 5595; 1660; 7316; 6233	97	97
1.47591e-09	1.18192e-08	vegf hypoxia and angiogenesis	BioCarta	vegfpathway	SRC; SHC1; VHL; PRKCA; AKT1; GRB2; PXN; HSP90AA1	207; 7428; 5578; 3320; 5829; 6714; 6464; 2885	30	30
1.75388e-09	1.39328e-08	Signaling by NOTCH3	Reactome	R-HSA-9012852	SNW1; STAT1; RPS27A; EGFR; UBA52; UBB; UBC; EP300; YBX1	22938; 6772; 1956; 4904; 7316; 7311; 7314; 6233; 2033	44	44
1.81621e-09	1.42007e-08	AGE-RAGE signaling pathway in diabetic complications - Homo sapiens (human)	KEGG	path:hsa04933	STAT1; FN1; AKT1; PRKCA; JUN; PRKCD; SMAD2; PLCG2; MAPK1; NFKB1; MAPK3; CDC42	6772; 3725; 4790; 207; 5336; 2335; 5578; 5580; 5594; 5595; 998; 4087	99	99
1.81621e-09	1.42007e-08	Cargo recognition for clathrin-mediated endocytosis	Reactome	R-HSA-8856825	RPS27A; CLTC; UBC; EGFR; HGS; COPS5; UBA52; GRB2; ARRB2; UBB; ARRB1; DAB2	10987; 1956; 2885; 408; 1601; 9146; 7311; 7314; 409; 7316; 1213; 6233	99	99
1.92662e-09	1.49464e-08	Deubiquitination	Reactome	R-HSA-5688426	ARRB1; BRCA1; TP53; ACTB; TRAF6; ESR1; RPS27A; HGS; SMAD2; CDK1; UBA52; ARRB2; IKBKG; UBB; UBC; APC; MYC; EP300; MDM2	983; 408; 7316; 7157; 7314; 6233; 2033; 9146; 8517; 4609; 7311; 7189; 672; 2099; 4193; 409; 4087; 324; 60	296	296
2.10822e-09	1.61025e-08	Signaling by MET	Reactome	R-HSA-6806834	SRC; SHC1; PTPN11; RPS27A; HGS; RAP1A; UBA52; GRB2; UBB; UBC	6714; 5906; 6464; 5781; 9146; 7316; 7311; 2885; 7314; 6233	61	61
2.10822e-09	1.61025e-08	Oncogenic MAPK signaling	Reactome	R-HSA-6802957	SRC; FN1; PHB; VCL; RAP1A; MAPK3; MAPK1; ARRB2; ARRB1; LMNA	7414; 5245; 4000; 6714; 5595; 5594; 409; 408; 5906; 2335	61	61
2.14052e-09	1.61025e-08	CD28 dependent Vav1 pathway	Reactome	R-HSA-389359	VAV1; FYN; LCK; GRB2; PAK1; CDC42	2534; 2885; 7409; 3932; 998; 5058	12	12
2.14052e-09	1.61025e-08	Stabilization of p53	Reactome	R-HSA-69541	TP53; RPS27A; UBA52; UBB; UBC; MDM2	7316; 7157; 7311; 4193; 7314; 6233	12	12
2.30418e-09	1.72034e-08	Cell cycle - Homo sapiens (human)	KEGG	path:hsa04110	YWHAZ; PCNA; EP300; TP53; RB1; YWHAG; CDK1; CDK2; SMAD2; ABL1; MYC; PRKDC; MDM2	4609; 25; 4193; 5925; 7532; 7534; 5111; 7157; 4087; 983; 5591; 2033; 1017	124	124
2.59991e-09	1.92665e-08	bcr signaling pathway	BioCarta	bcrpathway	SHC1; PRKCA; JUN; VAV1; MAPK3; GRB2; LYN; CSNK2A1	4067; 3725; 5578; 6464; 5595; 2885; 1457; 7409	32	32
2.82161e-09	2.06019e-08	p53-Dependent G1 DNA Damage Response	Reactome	R-HSA-69563	TP53; RPS27A; CDK2; UBA52; UBB; UBC; MDM2	7316; 7157; 7311; 4193; 7314; 6233; 1017	21	21
2.82161e-09	2.06019e-08	p53-Dependent G1/S DNA damage checkpoint	Reactome	R-HSA-69580	TP53; RPS27A; CDK2; UBA52; UBB; UBC; MDM2	7316; 7157; 7311; 4193; 7314; 6233; 1017	21	21
2.88543e-09	2.09141e-08	Negative regulation of the PI3K/AKT network	Reactome	R-HSA-199418	SRC; MAPK3; TRAF6; ESR1; VAV1; FYN; PTPN11; EGFR; GRB2; AKT1; MAPK1; LCK	207; 2534; 1956; 5594; 6714; 5781; 2099; 3932; 2885; 7189; 5595; 7409	103	103
3.06701e-09	2.20691e-08	Cellular responses to external stimuli	Reactome	R-HSA-8953897	MOV10; HSPA5; EEF1A1; RPS27A; VHL; JUN; CDK2; RB1; HSP90AB1; MAPK3; MAPK1; NFKB1; NR3C1; HSPA8; SP1; MDM2; EP300; TP53; UBA52; UBB; UBC; HSP90AA1	5925; 4193; 3312; 5595; 7316; 1017; 6667; 3326; 2908; 2033; 7311; 3320; 3725; 7157; 4790; 7314; 1915; 6233; 5594; 3309; 4343; 7428	414	413
3.09907e-09	2.21394e-08	Osteoclast differentiation - Homo sapiens (human)	KEGG	path:hsa04380	MAPK3; TRAF6; STAT1; AKT1; FYN; TNFRSF1A; JUN; PLCG2; GRB2; IKBKG; NFKB1; LCK; MAPK1	7189; 6772; 3725; 4790; 207; 5336; 8517; 3932; 2885; 5594; 5595; 7132; 2534	128	127
3.36723e-09	2.38833e-08	C-type lectin receptors (CLRs)	Reactome	R-HSA-5621481	SRC; TRAF6; FYN; PRKCD; PLCG2; PRKACA; IKBKG; NFKB1; LYN; EP300; PAK1	4067; 5336; 4790; 7189; 6714; 5566; 8517; 2033; 5580; 2534; 5058	83	83
3.7361e-09	2.63117e-08	Hemostasis	Reactome	R-HSA-109582	HSPA5; RAP1A; PLCG2; ARRB2; ARRB1; ABL1; A2M; YWHAZ; FYN; MAPK3; MAPK1; LYN; SRC; SHC1; PRKCA; VCL; PRKCD; TP53; FN1; AKT1; VAV1; PTPN11; ALB; CDK2; GRB2; PRKACA; LCK; CDC42	5336; 5578; 408; 6714; 2335; 2885; 5595; 2; 2534; 5906; 3932; 213; 409; 7409; 998; 1017; 5580; 7157; 25; 207; 4067; 6464; 5594; 3309; 5566; 5781; 7414; 7534	668	667
3.93661e-09	2.75283e-08	NF-kB is activated and signals survival	Reactome	R-HSA-209560	TRAF6; RPS27A; UBA52; UBB; UBC; NFKB1	7316; 7189; 7311; 7314; 6233; 4790	13	13
3.98576e-09	2.75283e-08	agrin in postsynaptic differentiation	BioCarta	agrpathway	SRC; JUN; EGFR; MAPK3; MAPK1; PXN; SP1; PAK1; CDC42	3725; 6714; 5595; 998; 1956; 5829; 6667; 5594; 5058	48	48
4.01973e-09	2.75283e-08	MAP kinase activation	Reactome	R-HSA-450294	TRAF6; RPS27A; JUN; MAPK3; UBA52; MAPK1; IKBKG; UBB; UBC; NFKB1	3725; 4790; 7189; 5595; 8517; 7316; 7311; 5594; 7314; 6233	65	65
4.01973e-09	2.75283e-08	Interleukin-17 signaling	Reactome	R-HSA-448424	TRAF6; RPS27A; JUN; MAPK3; UBA52; MAPK1; IKBKG; UBB; UBC; NFKB1	3725; 4790; 7189; 5595; 8517; 7316; 7311; 5594; 7314; 6233	65	65
4.3991e-09	2.99199e-08	Signaling by high-kinase activity BRAF mutants	Reactome	R-HSA-6802948	SRC; FN1; VCL; RAP1A; MAPK3; MAPK1; ARRB2; ARRB1	6714; 5595; 5594; 409; 408; 7414; 5906; 2335	34	34
4.42974e-09	2.99233e-08	Autodegradation of the E3 ubiquitin ligase COP1	Reactome	R-HSA-349425	UBA52; RPS27A; TP53; UBB; UBC	7316; 7157; 7311; 7314; 6233	7	7
4.69004e-09	3.14676e-08	Signaling by ROBO receptors	Reactome	R-HSA-376176	NCK1; PRKCA; RPS27A; UBA52; PRKACA; UBB; UBC; ABL1; PAK1; CDC42	5578; 998; 4690; 25; 5566; 7316; 7311; 7314; 6233; 5058	66	66
4.95104e-09	3.29959e-08	Colorectal cancer - Homo sapiens (human)	KEGG	path:hsa05210	TP53; MAPK3; EGFR; JUN; SMAD2; CTNNB1; AKT1; GRB2; APC; MYC; MAPK1	4609; 3725; 207; 1499; 2885; 324; 1956; 5594; 5595; 7157; 4087	86	86
5.6107e-09	3.66541e-08	MyD88 cascade initiated on plasma membrane	Reactome	R-HSA-975871	DHX9; TRAF6; RPS27A; JUN; MAPK3; UBA52; MAPK1; IKBKG; UBB; UBC; NFKB1	3725; 5594; 4790; 8517; 7311; 7314; 7189; 5595; 1660; 7316; 6233	87	87
5.6107e-09	3.66541e-08	Toll Like Receptor 10 (TLR10) Cascade	Reactome	R-HSA-168142	DHX9; TRAF6; RPS27A; JUN; MAPK3; UBA52; MAPK1; IKBKG; UBB; UBC; NFKB1	3725; 5594; 4790; 8517; 7311; 7314; 7189; 5595; 1660; 7316; 6233	87	87
5.6107e-09	3.66541e-08	Toll Like Receptor 5 (TLR5) Cascade	Reactome	R-HSA-168176	DHX9; TRAF6; RPS27A; JUN; MAPK3; UBA52; MAPK1; IKBKG; UBB; UBC; NFKB1	3725; 5594; 4790; 8517; 7311; 7314; 7189; 5595; 1660; 7316; 6233	87	87
5.83229e-09	3.78527e-08	G1/S DNA Damage Checkpoints	Reactome	R-HSA-69615	TP53; RPS27A; UBA52; CDK2; UBB; UBC; MDM2	7157; 1017; 7316; 7311; 4193; 7314; 6233	23	23
6.33438e-09	4.06669e-08	Epithelial cell signaling in Helicobacter pylori infection - Homo sapiens (human)	KEGG	path:hsa05120	SRC; JUN; PTPN11; EGFR; PLCG2; IKBKG; NFKB1; LYN; PAK1; CDC42	3725; 5781; 1956; 4790; 6714; 5058; 8517; 5336; 4067; 998	68	68
6.3478e-09	4.06669e-08	TRAF6 mediated induction of NFkB and MAP kinases upon TLR7/8 or 9 activation	Reactome	R-HSA-975138	DHX9; TRAF6; RPS27A; JUN; MAPK3; UBA52; MAPK1; IKBKG; UBB; UBC; NFKB1	3725; 5594; 4790; 8517; 7311; 7314; 7189; 5595; 1660; 7316; 6233	88	88
7.87136e-09	5.01043e-08	G2/M Transition	Reactome	R-HSA-69275	TP53; RPS27A; UBA52; TUBB; HSP90AB1; CDK1; CDK2; PRKACA; UBB; UBC; HSP90AA1; EP300; YWHAG	1017; 983; 3326; 7157; 5566; 2033; 7532; 7314; 6233; 7311; 3320; 7316; 203068	137	137
8.08655e-09	5.08225e-08	MyD88 dependent cascade initiated on endosome	Reactome	R-HSA-975155	DHX9; TRAF6; RPS27A; JUN; MAPK3; UBA52; MAPK1; IKBKG; UBB; UBC; NFKB1	3725; 5594; 4790; 8517; 7311; 7314; 7189; 5595; 1660; 7316; 6233	90	90
8.08655e-09	5.08225e-08	Toll Like Receptor 7/8 (TLR7/8) Cascade	Reactome	R-HSA-168181	DHX9; TRAF6; RPS27A; JUN; MAPK3; UBA52; MAPK1; IKBKG; UBB; UBC; NFKB1	3725; 5594; 4790; 8517; 7311; 7314; 7189; 5595; 1660; 7316; 6233	90	90
8.15274e-09	5.09162e-08	tumor suppressor arf inhibits ribosomal biogenesis	BioCarta	arfpathway	TP53; RB1; AKT1; ABL1; HSP90AA1; MDM2; MYC	7157; 207; 5925; 3320; 25; 4193; 4609	24	24
8.39934e-09	5.21284e-08	mechanism of gene regulation by peroxisome proliferators via ppara	BioCarta	pparapathway	PRKCA; SP1; JUN; RB1; MAPK3; MAPK1; HSP90AA1; MYC; EP300	3320; 3725; 5925; 5578; 6667; 5594; 2033; 4609; 5595	52	52
8.47024e-09	5.22419e-08	B cell receptor signaling pathway - Homo sapiens (human)	KEGG	path:hsa04662	AKT1; VAV1; JUN; PLCG2; GRB2; IKBKG; NFKB1; LYN; MAPK3; MAPK1	207; 3725; 8517; 4790; 2885; 5336; 5594; 5595; 4067; 7409	71	70
8.60259e-09	5.27307e-08	Clathrin-mediated endocytosis	Reactome	R-HSA-8856828	ARRB1; RPS27A; CLTC; HSPA8; EGFR; HGS; COPS5; UBA52; GRB2; ARRB2; UBB; UBC; DAB2	10987; 1956; 2885; 3312; 1601; 7311; 7314; 9146; 409; 7316; 408; 1213; 6233	138	138
9.07838e-09	5.53057e-08	trefoil factors initiate mucosal healing	BioCarta	tffpathway	SHC1; MAPK3; EGFR; CTNNB1; AKT1; GRB2; IKBKG; MAPK1	207; 2885; 5595; 1956; 8517; 6464; 5594; 1499	37	37
9.39471e-09	5.68839e-08	Mitotic G2-G2/M phases	Reactome	R-HSA-453274	TP53; RPS27A; UBA52; TUBB; HSP90AB1; CDK1; CDK2; PRKACA; UBB; UBC; HSP90AA1; EP300; YWHAG	1017; 983; 3326; 7157; 5566; 2033; 7532; 7314; 6233; 7311; 3320; 7316; 203068	139	139
1.02388e-08	6.16187e-08	GnRH signaling pathway - Homo sapiens (human)	KEGG	path:hsa04912	SRC; PRKCA; JUN; EGFR; PRKCD; MAPK3; GRB2; PRKACA; MAP3K3; MAPK1; CDC42	6714; 4215; 3725; 2885; 1956; 5566; 5578; 5580; 5594; 5595; 998	92	92
1.12118e-08	6.57288e-08	tpo signaling pathway	BioCarta	tpopathway	SHC1; STAT1; PRKCA; JUN; MAPK3; GRB2; CSNK2A1	3725; 5578; 6772; 5595; 2885; 6464; 1457	25	25
1.12118e-08	6.57288e-08	Regulation of PTEN stability and activity	Reactome	R-HSA-8948751	RPS27A; TRIM27; AKT1; UBA52; UBB; UBC; CSNK2A1	5987; 207; 7311; 1457; 7316; 7314; 6233	25	25
1.12118e-08	6.57288e-08	SMAD2/SMAD3:SMAD4 heterotrimer regulates transcription	Reactome	R-HSA-2173796	SNW1; SP1; RPS27A; SMAD2; UBA52; UBB; UBC	22938; 7311; 6667; 4087; 7316; 7314; 6233	25	25
1.12597e-08	6.57288e-08	telomeres telomerase cellular aging and immortality	BioCarta	telpathway	TP53; PRKCA; RB1; AKT1; MYC; XRCC6	207; 4609; 2547; 7157; 5925; 5578	15	15
1.12597e-08	6.57288e-08	InlB-mediated entry of Listeria monocytogenes into host cell	Reactome	R-HSA-8875360	RPS27A; HGS; UBA52; GRB2; UBB; UBC	7316; 7311; 9146; 7314; 2885; 6233	15	15
1.13851e-08	6.57288e-08	MAP2K and MAPK activation	Reactome	R-HSA-5674135	SRC; FN1; VCL; RAP1A; MAPK3; MAPK1; ARRB2; ARRB1	5594; 6714; 5595; 409; 408; 7414; 5906; 2335	38	38
1.13851e-08	6.57288e-08	Transcriptional activity of SMAD2/SMAD3:SMAD4 heterotrimer	Reactome	R-HSA-2173793	SNW1; SP1; RPS27A; PARP1; SMAD2; UBA52; UBB; UBC	6667; 22938; 7311; 4087; 7316; 142; 7314; 6233	38	38
1.17002e-08	6.71579e-08	InlA-mediated entry of Listeria monocytogenes into host cells	Reactome	R-HSA-8876493	CTNNB1; UBA52; RPS27A; UBB; UBC	7316; 7311; 1499; 7314; 6233	8	8
1.18995e-08	6.75212e-08	Signaling by PTK6	Reactome	R-HSA-8848021	NR3C1; RPS27A; EGFR; UBA52; AKT1; CDK2; PXN; UBB; UBC	207; 1017; 1956; 7316; 7311; 5829; 2908; 7314; 6233	54	54
1.18995e-08	6.75212e-08	Signaling by Non-Receptor Tyrosine Kinases	Reactome	R-HSA-9006927	NR3C1; RPS27A; EGFR; UBA52; AKT1; CDK2; PXN; UBB; UBC	207; 1017; 1956; 7316; 7311; 5829; 2908; 7314; 6233	54	54
1.28883e-08	7.27164e-08	Toll Like Receptor 9 (TLR9) Cascade	Reactome	R-HSA-168138	DHX9; TRAF6; RPS27A; JUN; MAPK3; UBA52; MAPK1; IKBKG; UBB; UBC; NFKB1	3725; 5594; 4790; 8517; 7311; 7314; 7189; 5595; 1660; 7316; 6233	94	94
1.44269e-08	8.09371e-08	Ras signaling pathway - Homo sapiens (human)	KEGG	path:hsa04014	MAPK3; SHC1; PLCG2; PRKCA; PTPN11; EGFR; RAP1A; AKT1; GRB2; PRKACA; IKBKG; ABL1; NFKB1; PAK1; MAPK1; CDC42	25; 207; 5906; 5781; 4790; 5336; 6464; 2885; 8517; 1956; 5566; 5058; 5578; 5594; 5595; 998	232	232
1.47331e-08	8.21909e-08	Bacterial invasion of epithelial cells - Homo sapiens (human)	KEGG	path:hsa05100	SRC; SHC1; FN1; VCL; ILK; CTNNB1; PXN; CLTC; ACTB; CDC42	3611; 6714; 60; 1213; 6464; 7414; 5829; 1499; 998; 2335	74	74
1.78406e-08	9.61716e-08	Regulation of KIT signaling	Reactome	R-HSA-1433559	SRC; PRKCA; FYN; GRB2; LYN; LCK	4067; 6714; 2534; 2885; 5578; 3932	16	16
1.78406e-08	9.61716e-08	calcium signaling by hbx of hepatitis b virus	BioCarta	hbxpathway	SRC; SHC1; JUN; MAPK3; GRB2; CSNK2A1	6464; 6714; 5595; 3725; 2885; 1457	16	16
1.78406e-08	9.61716e-08	p75NTR signals via NF-kB	Reactome	R-HSA-193639	TRAF6; RPS27A; UBA52; UBB; UBC; NFKB1	7316; 7189; 7311; 6233; 7314; 4790	16	16
1.78406e-08	9.61716e-08	MAP3K8 (TPL2)-dependent MAPK1/3 activation	Reactome	R-HSA-5684264	RPS27A; UBA52; IKBKG; UBB; UBC; NFKB1	7316; 7311; 7314; 6233; 8517; 4790	16	16
1.8014e-08	9.61716e-08	MyD88:Mal cascade initiated on plasma membrane	Reactome	R-HSA-166058	DHX9; TRAF6; RPS27A; JUN; MAPK3; UBA52; MAPK1; IKBKG; UBB; UBC; NFKB1	3725; 5594; 4790; 8517; 7311; 7314; 7189; 5595; 1660; 7316; 6233	97	97
1.8014e-08	9.61716e-08	Toll Like Receptor TLR1:TLR2 Cascade	Reactome	R-HSA-168179	DHX9; TRAF6; RPS27A; JUN; MAPK3; UBA52; MAPK1; IKBKG; UBB; UBC; NFKB1	3725; 5594; 4790; 8517; 7311; 7314; 7189; 5595; 1660; 7316; 6233	97	97
1.8014e-08	9.61716e-08	Toll Like Receptor TLR6:TLR2 Cascade	Reactome	R-HSA-168188	DHX9; TRAF6; RPS27A; JUN; MAPK3; UBA52; MAPK1; IKBKG; UBB; UBC; NFKB1	3725; 5594; 4790; 8517; 7311; 7314; 7189; 5595; 1660; 7316; 6233	97	97
1.8014e-08	9.61716e-08	Toll Like Receptor 2 (TLR2) Cascade	Reactome	R-HSA-181438	DHX9; TRAF6; RPS27A; JUN; MAPK3; UBA52; MAPK1; IKBKG; UBB; UBC; NFKB1	3725; 5594; 4790; 8517; 7311; 7314; 7189; 5595; 1660; 7316; 6233	97	97
1.9185e-08	1.01875e-07	G1/S Transition	Reactome	R-HSA-69206	PCNA; CDK1; RPS27A; UBA52; RB1; AKT1; CDK2; UBB; UBC; MYC	1017; 207; 983; 7311; 5111; 7316; 4609; 7314; 6233; 5925	76	76
2.03064e-08	1.07257e-07	pdgf signaling pathway	BioCarta	pdgfpathway	SHC1; STAT1; PRKCA; JUN; MAPK3; GRB2; CSNK2A1	3725; 5578; 6772; 5595; 2885; 6464; 1457	27	27
2.1588e-08	1.13423e-07	Bladder cancer - Homo sapiens (human)	KEGG	path:hsa05219	SRC; TP53; EGFR; RB1; MAPK3; MAPK1; MYC; MDM2	4609; 5925; 6714; 5594; 5595; 4193; 1956; 7157	41	41
2.18063e-08	1.13479e-07	Gastric cancer - Homo sapiens (human)	KEGG	path:hsa05226	TP53; SHC1; MAPK3; EGFR; SMAD2; CTNNB1; AKT1; CDK2; GRB2; RB1; APC; MYC; MAPK1	4609; 207; 5595; 5925; 324; 4087; 6464; 2885; 1956; 5594; 1499; 7157; 1017	149	149
2.18274e-08	1.13479e-07	Costimulation by the CD28 family	Reactome	R-HSA-388841	SRC; VAV1; PTPN11; FYN; PAK1; AKT1; GRB2; LYN; LCK; CDC42	4067; 207; 3932; 5781; 6714; 2534; 2885; 998; 7409; 5058	77	77
2.28902e-08	1.18385e-07	Signaling by BRAF and RAF fusions	Reactome	R-HSA-6802952	SRC; FN1; VCL; RAP1A; MAPK3; MAPK1; ARRB2; ARRB1; LMNA	7414; 4000; 6714; 5595; 5594; 409; 408; 5906; 2335	58	58
2.36353e-08	1.21606e-07	Fc epsilon receptor (FCERI) signaling	Reactome	R-HSA-2454202	SHC1; TRAF6; MAPK3; VAV1; FYN; JUN; GRB2; PLCG2; MAPK1; IKBKG; NFKB1; LYN; PAK1	4067; 5336; 2534; 3725; 6464; 5594; 2885; 4790; 5058; 8517; 7189; 5595; 7409	150	150
2.6075e-08	1.33467e-07	PTK6 Regulates RTKs and Their Effectors AKT1 and DOK1	Reactome	R-HSA-8849469	AKT1; UBA52; RPS27A; UBB; UBC	7316; 207; 7314; 6233; 7311	9	9
2.68087e-08	1.35822e-07	influence of ras and rho proteins on g1 to s transition	BioCarta	raccycdpathway	MAPK3; RB1; AKT1; CDK2; MAPK1; IKBKG; PAK1	207; 1017; 5925; 5595; 8517; 5594; 5058	28	28
2.68087e-08	1.35822e-07	Regulation of RUNX2 expression and activity	Reactome	R-HSA-8939902	NR3C1; STAT1; ESR1; RPS27A; UBA52; UBB; UBC	2908; 6772; 7316; 7311; 7314; 6233; 2099	28	28
3.10991e-08	1.56199e-07	PI3K-Akt signaling pathway - Homo sapiens (human)	KEGG	path:hsa04151	BRCA1; YWHAZ; TP53; FN1; MAPK3; PRKCA; EGFR; HSP90B1; YWHAG; HSP90AB1; AKT1; CDK2; GRB2; IKBKG; HSP90AA1; NFKB1; MDM2; MYC; MAPK1	4193; 207; 2335; 8517; 4609; 672; 4790; 2885; 7532; 7157; 1017; 7184; 3320; 3326; 7534; 5578; 5594; 5595; 1956	352	351
3.11454e-08	1.56199e-07	Interleukin-1 signaling	Reactome	R-HSA-9020702	DHX9; TRAF6; MAP3K3; RPS27A; UBA52; IKBKG; UBB; UBC; NFKB1	4790; 7189; 8517; 1660; 4215; 7316; 7311; 7314; 6233	60	60
3.49909e-08	1.72865e-07	Downregulation of ERBB2 signaling	Reactome	R-HSA-8863795	RPS27A; EGFR; AKT1; UBA52; UBB; UBC; HSP90AA1	207; 3320; 1956; 7316; 7311; 7314; 6233	29	29
3.49909e-08	1.72865e-07	Cyclin A:Cdk2-associated events at S phase entry	Reactome	R-HSA-69656	RPS27A; CDK2; RB1; AKT1; UBA52; UBB; UBC	207; 5925; 7316; 7311; 1017; 7314; 6233	29	29
3.49909e-08	1.72865e-07	fc epsilon receptor i signaling in mast cells	BioCarta	fcer1pathway	SHC1; VAV1; JUN; MAPK3; GRB2; MAPK1; LYN	4067; 3725; 5595; 2885; 6464; 5594; 7409	29	29
3.78044e-08	1.8584e-07	Herpes simplex infection - Homo sapiens (human)	KEGG	path:hsa05168	TP53; TRAF6; STAT1; TNFRSF1A; HLA-B; PTPN11; JUN; CDK1; CDK2; IKBKG; IKBKE; NFKB1; EP300; CSNK2A1	7189; 3106; 6772; 3725; 5781; 4790; 8517; 2033; 9641; 1457; 983; 7132; 7157; 1017	185	185
3.88626e-08	1.87333e-07	Signaling by ERBB4	Reactome	R-HSA-1236394	SHC1; ESR1; RPS27A; EGFR; UBA52; GRB2; UBB; UBC	1956; 2885; 7316; 6464; 7311; 7314; 6233; 2099	44	44
3.88626e-08	1.87333e-07	Interleukin-3, 5 and GM-CSF signaling	Reactome	R-HSA-512988	YWHAZ; SHC1; VAV1; PTPN11; FYN; GRB2; PRKACA; LYN	4067; 5781; 2534; 6464; 5566; 2885; 7534; 7409	44	44
3.88626e-08	1.87333e-07	Cyclin D associated events in G1	Reactome	R-HSA-69231	SRC; RPS27A; RB1; UBA52; UBB; UBC; ABL1; LYN	4067; 5925; 7311; 6714; 25; 7316; 7314; 6233	44	44
3.88626e-08	1.87333e-07	G1 Phase	Reactome	R-HSA-69236	SRC; RPS27A; RB1; UBA52; UBB; UBC; ABL1; LYN	4067; 5925; 7311; 6714; 25; 7316; 7314; 6233	44	44
4.3724e-08	2.09749e-07	Infectious disease	Reactome	R-HSA-5663205	RPS27A; CLTC; SSRP1; KPNB1; FYN; HGS; SLC25A5; CTNNB1; UBA52; GRB2; UBB; UBC; HSP90AA1; NPM1; LCK; XRCC6	292; 2534; 2547; 2885; 6749; 3932; 9146; 4869; 7311; 7314; 3837; 3320; 7316; 1213; 6233; 1499	253	251
4.511e-08	2.14712e-07	Hepatitis C - Homo sapiens (human)	KEGG	path:hsa05160	TP53; TRAF6; STAT1; MAPK3; TNFRSF1A; EGFR; AKT1; GRB2; IKBKG; IKBKE; NFKB1; MAPK1	7189; 6772; 4790; 207; 8517; 2885; 1956; 9641; 5594; 5595; 7132; 7157	131	131
4.51911e-08	2.14712e-07	Deactivation of the beta-catenin transactivating complex	Reactome	R-HSA-3769402	YWHAZ; RPS27A; CTNNB1; AKT1; UBA52; UBB; UBC	207; 1499; 7316; 7534; 7311; 7314; 6233	30	30
4.63195e-08	2.19025e-07	Cellular Senescence	Reactome	R-HSA-2559583	TP53; SP1; RPS27A; JUN; UBA52; RB1; MAPK3; CDK2; MAPK1; UBB; UBC; NFKB1; MDM2; MOV10	3725; 5925; 6667; 5594; 4193; 1017; 7316; 7157; 7314; 4790; 4343; 7311; 5595; 6233	189	188
4.74833e-08	2.23464e-07	Fcgamma receptor (FCGR) dependent phagocytosis	Reactome	R-HSA-2029480	NCK1; MAPK3; VAV1; GRB2; PRKCD; HSP90AB1; PLCG2; MAPK1; ABL1; HSP90AA1; ACTB; PAK1; CDC42	3320; 5336; 7409; 998; 5594; 5580; 3326; 4690; 60; 5058; 25; 2885; 5595	159	159
4.9122e-08	2.30085e-07	Natural killer cell mediated cytotoxicity - Homo sapiens (human)	KEGG	path:hsa04650	SHC1; MAPK3; VAV1; HLA-B; PTPN11; FYN; PAK1; PLCG2; GRB2; PRKCA; MAPK1; LCK	3106; 5781; 5336; 7409; 6464; 2885; 3932; 5058; 5578; 5594; 5595; 2534	133	132
5.11626e-08	2.38519e-07	Cellular senescence - Homo sapiens (human)	KEGG	path:hsa04218	TP53; MAPK3; CDK1; HLA-B; CDK2; SLC25A5; AKT1; SMAD2; MAPK1; RB1; NFKB1; MYC; MDM2	4609; 3106; 4193; 4790; 207; 292; 5925; 983; 5594; 5595; 7157; 4087; 1017	160	160
5.50968e-08	2.55659e-07	Regulation of TP53 Activity	Reactome	R-HSA-5633007	BRCA1; TP53; CDK1; SSRP1; RPS27A; UBA52; AKT1; CDK2; UBB; UBC; MDM2; EP300; CSNK2A1	207; 983; 1457; 4193; 1017; 7157; 2033; 7311; 7314; 6749; 672; 7316; 6233	161	161
6.4052e-08	2.95831e-07	Shigellosis - Homo sapiens (human)	KEGG	path:hsa05131	SRC; VCL; MAPK3; MAPK1; IKBKG; ABL1; NFKB1; ACTB; CDC42	25; 8517; 4790; 6714; 60; 7414; 5594; 5595; 998	65	65
7.18178e-08	3.30163e-07	Transcriptional Regulation by TP53	Reactome	R-HSA-3700989	PCNA; BRCA1; YWHAZ; TP53; CDK1; SSRP1; RPS27A; JUN; CDK2; AKT1; UBA52; UBB; UBC; MOV10; MDM2; EP300; NPM1; YWHAG; CSNK2A1	207; 1457; 4193; 7316; 983; 2033; 7311; 3725; 1017; 7157; 7314; 6749; 5111; 6233; 7532; 4343; 4869; 672; 7534	373	370
7.34249e-08	3.35995e-07	Non-small cell lung cancer - Homo sapiens (human)	KEGG	path:hsa05223	TP53; PLCG2; PRKCA; EGFR; RB1; MAPK3; GRB2; AKT1; MAPK1	5595; 1956; 5925; 5578; 2885; 5336; 5594; 207; 7157	66	66
8.30455e-08	3.78276e-07	sprouty regulation of tyrosine kinase signals	BioCarta	sprypathway	SRC; SHC1; EGFR; MAPK3; GRB2; MAPK1	6464; 5594; 6714; 5595; 1956; 2885	20	20
8.39715e-08	3.80748e-07	Fc epsilon RI signaling pathway - Homo sapiens (human)	KEGG	path:hsa04664	PLCG2; PRKCA; FYN; VAV1; MAPK3; GRB2; AKT1; MAPK1; LYN	5595; 2885; 5578; 207; 5336; 5594; 4067; 2534; 7409	68	67
8.49817e-08	3.83577e-07	DNA Double-Strand Break Repair	Reactome	R-HSA-5693532	UBE2I; BRCA1; TP53; RPS27A; UBA52; PRKDC; CDK2; PARP1; PCNA; UBB; UBC; ABL1; XRCC6	1017; 5591; 2547; 7316; 7157; 7329; 25; 7311; 7314; 672; 5111; 142; 6233	169	167
8.7385e-08	3.92639e-07	Fluid shear stress and atherosclerosis - Homo sapiens (human)	KEGG	path:hsa05418	SRC; TP53; TNFRSF1A; JUN; HSP90B1; HSP90AB1; AKT1; CTNNB1; IKBKG; HSP90AA1; NFKB1; ACTB	7184; 6714; 60; 3725; 4790; 207; 3320; 3326; 8517; 7157; 1499; 7132	139	139
9.20598e-08	4.08104e-07	phospholipids as signalling intermediaries	BioCarta	edg1pathway	SRC; SHC1; MAPK3; PRKCA; AKT1; GRB2; MAPK1	207; 5578; 6714; 5595; 2885; 6464; 5594	33	33
9.20598e-08	4.08104e-07	GPVI-mediated activation cascade	Reactome	R-HSA-114604	VAV1; PTPN11; FYN; PLCG2; LYN; LCK; CDC42	4067; 2534; 5336; 3932; 5781; 998; 7409	33	33
9.20598e-08	4.08104e-07	bioactive peptide induced signaling pathway	BioCarta	biopeptidespathway	SHC1; STAT1; PRKCA; FYN; MAPK3; GRB2; MAPK1	5578; 6772; 5595; 2534; 2885; 6464; 5594	33	33
9.37983e-08	4.13963e-07	GAB1 signalosome	Reactome	R-HSA-180292	SRC; PTPN11; GRB2; EGFR; PXN	6714; 5829; 1956; 2885; 5781	11	11
9.77076e-08	4.29308e-07	Adaptive Immune System	Reactome	R-HSA-1280218	HSPA5; HLA-B; RPS27A; RAP1A; PLCG2; IKBKG; CLTC; YWHAZ; FYN; NFKB1; LYN; VHL; SRC; SHC1; TRAF6; NCK1; AKT1; VAV1; PTPN11; PAK1; UBA52; GRB2; PRKACA; UBB; UBC; LCK; CDC42	207; 5336; 6714; 2885; 3106; 7316; 2534; 4690; 5906; 5058; 3932; 7311; 7189; 1213; 7409; 998; 4790; 7314; 6233; 6464; 3309; 5566; 4067; 7428; 5781; 8517; 7534	732	728
9.98548e-08	4.3681e-07	Fc gamma R-mediated phagocytosis - Homo sapiens (human)	KEGG	path:hsa04666	MAPK3; PLCG2; VAV1; PRKCD; AKT1; MAPK1; PRKCA; LYN; PAK1; CDC42	207; 5336; 7409; 5058; 5578; 5580; 5594; 5595; 4067; 998	91	90
1.15135e-07	4.90683e-07	CTLA4 inhibitory signaling	Reactome	R-HSA-389513	SRC; PTPN11; FYN; AKT1; LYN; LCK	4067; 6714; 2534; 5781; 3932; 207	21	21
1.15135e-07	4.90683e-07	igf-1 signaling pathway	BioCarta	igf1pathway	SHC1; PTPN11; JUN; MAPK3; GRB2; CSNK2A1	5781; 6464; 5595; 3725; 2885; 1457	21	21
1.15135e-07	4.90683e-07	cell cycle: g2/m checkpoint	BioCarta	g2pathway	BRCA1; TP53; PRKDC; CDK1; MDM2; EP300	7157; 672; 2033; 983; 4193; 5591	21	21
1.15135e-07	4.90683e-07	Downregulation of SMAD2/3:SMAD4 transcriptional activity	Reactome	R-HSA-2173795	RPS27A; PARP1; SMAD2; UBA52; UBB; UBC	7316; 142; 7311; 7314; 6233; 4087	21	21
1.15135e-07	4.90683e-07	TICAM1, RIP1-mediated IKK complex recruitment	Reactome	R-HSA-168927	TRAF6; RPS27A; UBA52; IKBKG; UBB; UBC	7316; 7189; 7311; 7314; 6233; 8517	21	21
1.15135e-07	4.90683e-07	Negative regulation of MET activity	Reactome	R-HSA-6807004	RPS27A; HGS; UBA52; GRB2; UBB; UBC	7316; 7311; 9146; 7314; 6233; 2885	21	21
1.23932e-07	5.25915e-07	Prolactin signaling pathway - Homo sapiens (human)	KEGG	path:hsa04917	SRC; SHC1; STAT1; ESR1; AKT1; GRB2; NFKB1; MAPK3; MAPK1	2099; 4790; 6714; 6772; 6464; 2885; 207; 5594; 5595	70	70
1.3683e-07	5.73301e-07	PI3K/AKT Signaling in Cancer	Reactome	R-HSA-2219528	SRC; ESR1; VAV1; FYN; PTPN11; EGFR; AKT1; GRB2; MDM2; LCK	207; 2534; 1956; 4193; 6714; 5781; 2099; 3932; 2885; 7409	93	93
1.3683e-07	5.73301e-07	Regulation of TP53 Activity through Phosphorylation	Reactome	R-HSA-6804756	BRCA1; TP53; SSRP1; RPS27A; UBA52; CDK2; UBB; UBC; MDM2; CSNK2A1	1017; 1457; 4193; 7157; 7311; 7314; 6749; 672; 7316; 6233	93	93
1.3683e-07	5.73301e-07	IL-17 signaling pathway - Homo sapiens (human)	KEGG	path:hsa04657	TRAF6; IKBKE; JUN; HSP90B1; HSP90AB1; MAPK3; MAPK1; IKBKG; HSP90AA1; NFKB1	7184; 7189; 3725; 4790; 3320; 3326; 8517; 9641; 5594; 5595	93	93
1.51585e-07	6.32454e-07	NF-kappa B signaling pathway - Homo sapiens (human)	KEGG	path:hsa04064	UBE2I; TRAF6; TNFRSF1A; PARP1; PLCG2; IKBKG; NFKB1; LYN; LCK; CSNK2A1	7189; 142; 7329; 4790; 5336; 1457; 8517; 3932; 7132; 4067	95	94
1.56774e-07	6.48653e-07	inhibition of cellular proliferation by gleevec	BioCarta	gleevecpathway	STAT1; MAPK3; JUN; AKT1; GRB2; MYC	207; 3725; 6772; 5595; 2885; 4609	22	22
1.56774e-07	6.48653e-07	erk1/erk2 mapk signaling pathway	BioCarta	erkpathway	SRC; SHC1; MAPK3; GRB2; MAPK1; MYC	6714; 5595; 2885; 6464; 5594; 4609	22	22
1.59268e-07	6.56238e-07	PECAM1 interactions	Reactome	R-HSA-210990	SRC; LYN; FYN; PTPN11; LCK	4067; 5781; 6714; 2534; 3932	12	12
1.63617e-07	6.71371e-07	Regulation of actin cytoskeleton - Homo sapiens (human)	KEGG	path:hsa04810	MYH10; SRC; FN1; VAV1; VCL; MYH9; EGFR; MAPK3; MAPK1; PXN; APC; ACTB; PAK1; CDC42	4628; 4627; 6714; 60; 7409; 2335; 324; 1956; 7414; 5058; 5829; 5594; 5595; 998	208	208
1.7952e-07	7.33594e-07	Signaling by NOTCH1	Reactome	R-HSA-1980143	SNW1; EP300; UBC; UBA52; ARRB2; UBB; ARRB1; MYC; RPS27A	22938; 409; 7316; 7311; 408; 4609; 7314; 6233; 2033	74	73
2.13259e-07	8.67894e-07	RHO GTPases Activate WASPs and WAVEs	Reactome	R-HSA-5663213	NCK1; MAPK3; GRB2; ABL1; MAPK1; ACTB; CDC42	5595; 998; 5594; 4690; 25; 2885; 60	37	37
2.39237e-07	9.6964e-07	t cell receptor signaling pathway	BioCarta	tcrpathway	SHC1; PRKCA; JUN; FYN; VAV1; MAPK3; GRB2; LCK	3725; 5578; 3932; 5595; 2534; 2885; 6464; 7409	55	55
2.5635e-07	1.03059e-06	p53 signaling pathway	BioCarta	p53pathway	PCNA; MDM2; TP53; CDK2; RB1	7157; 4193; 1017; 5925; 5111	13	13
2.5635e-07	1.03059e-06	Downregulation of ERBB2:ERBB3 signaling	Reactome	R-HSA-1358803	AKT1; UBA52; RPS27A; UBB; UBC	7316; 207; 7314; 6233; 7311	13	13
2.58844e-07	1.03642e-06	DNA Damage Recognition in GG-NER	Reactome	R-HSA-5696394	RPS27A; PARP1; COPS5; UBA52; UBB; UBC; ACTB	10987; 7316; 7311; 142; 7314; 6233; 60	38	38
2.73208e-07	1.08954e-06	HIF-1 signaling pathway - Homo sapiens (human)	KEGG	path:hsa04066	VHL; PRKCA; EGFR; GAPDH; PLCG2; MAPK1; AKT1; NFKB1; EP300; MAPK3	2597; 4790; 207; 5336; 7428; 1956; 5578; 5594; 5595; 2033	100	100
2.86578e-07	1.13829e-06	Interleukin-1 family signaling	Reactome	R-HSA-446652	DHX9; TRAF6; MAP3K3; RPS27A; UBA52; IKBKG; UBB; UBC; NFKB1	4790; 7189; 8517; 1660; 7316; 7311; 4215; 7314; 6233	77	77
3.12363e-07	1.23576e-06	Degradation of beta-catenin by the destruction complex	Reactome	R-HSA-195253	RPS27A; CTNNB1; UBA52; UBB; UBC; APC; MYC	1499; 7316; 7311; 324; 4609; 7314; 6233	39	39
3.18268e-07	1.25413e-06	mapkinase signaling pathway	BioCarta	mapkpathway	STAT1; MAP3K3; JUN; MAPK3; MAPK1; SP1; MYC; PAK1	3725; 6772; 5595; 6667; 4215; 5594; 4609; 5058	57	57
3.61388e-07	1.41283e-06	NOTCH3 Activation and Transmission of Signal to the Nucleus	Reactome	R-HSA-9013507	RPS27A; EGFR; UBA52; UBB; UBC; YBX1	1956; 4904; 7316; 7311; 7314; 6233	25	25
3.61388e-07	1.41283e-06	IKK complex recruitment mediated by RIP1	Reactome	R-HSA-937041	TRAF6; RPS27A; UBA52; IKBKG; UBB; UBC	7189; 8517; 7316; 7311; 7314; 6233	25	25
3.749e-07	1.4599e-06	Transcriptional regulation by the AP-2 (TFAP2) family of transcription factors	Reactome	R-HSA-8864260	UBE2I; ESR1; EGFR; HSPD1; MYC; EP300; NPM1	7329; 1956; 4609; 3329; 2099; 4869; 2033	40	40
4.18671e-07	1.62399e-06	VEGF signaling pathway - Homo sapiens (human)	KEGG	path:hsa04370	SRC; PLCG2; PRKCA; AKT1; MAPK1; PXN; MAPK3; CDC42	207; 6714; 5829; 5578; 5336; 5594; 5595; 998	59	59
4.79702e-07	1.85348e-06	MicroRNAs in cancer - Homo sapiens (human)	KEGG	path:hsa05206	BRCA1; UBE2I; TP53; SHC1; PRKCA; GRB2; EGFR; VIM; PLCG2; MAPK1; NFKB1; ABL1; APC; MYC; EP300; MDM2	4609; 7157; 25; 324; 5594; 4193; 672; 7329; 4790; 5336; 7431; 5578; 6464; 2885; 1956; 2033	299	299
5.16832e-07	1.9892e-06	Th17 cell differentiation - Homo sapiens (human)	KEGG	path:hsa04659	STAT1; JUN; SMAD2; HSP90AB1; MAPK3; MAPK1; IKBKG; HSP90AA1; NFKB1; LCK	6772; 3725; 4790; 3320; 3326; 8517; 3932; 5594; 5595; 4087	107	107
5.86836e-07	2.21972e-06	EPHA-mediated growth cone collapse	Reactome	R-HSA-3928663	MYH10; SRC; LYN; MYH9; FYN	4628; 4067; 6714; 4627; 2534	15	15
5.86836e-07	2.21972e-06	GLI3 is processed to GLI3R by the proteasome	Reactome	R-HSA-5610785	UBA52; RPS27A; PRKACA; UBB; UBC	7316; 7311; 7314; 6233; 5566	15	15
5.86836e-07	2.21972e-06	Degradation of GLI2 by the proteasome	Reactome	R-HSA-5610783	UBA52; RPS27A; PRKACA; UBB; UBC	7316; 7311; 7314; 6233; 5566	15	15
5.86836e-07	2.21972e-06	Degradation of GLI1 by the proteasome	Reactome	R-HSA-5610780	UBA52; RPS27A; PRKACA; UBB; UBC	7316; 7311; 7314; 6233; 5566	16	15
5.92373e-07	2.21972e-06	transcription factor creb and its extracellular signals	BioCarta	crebpathway	SHC1; MAPK3; PRKCA; AKT1; GRB2; MAPK1	207; 5578; 6464; 5595; 2885; 5594	27	27
5.92373e-07	2.21972e-06	Integrin alphaIIb beta3 signaling	Reactome	R-HSA-354192	SRC; SHC1; FN1; RAP1A; AKT1; GRB2	207; 6714; 2885; 6464; 5906; 2335	27	27
5.92373e-07	2.21972e-06	Integrin signaling	Reactome	R-HSA-9006921	SRC; SHC1; FN1; RAP1A; AKT1; GRB2	207; 6714; 2885; 6464; 5906; 2335	27	27
6.09636e-07	2.27582e-06	Global Genome Nucleotide Excision Repair (GG-NER)	Reactome	R-HSA-5696399	UBE2I; PCNA; RPS27A; PARP1; COPS5; UBA52; UBB; UBC; ACTB	7329; 10987; 5111; 7316; 7311; 142; 7314; 6233; 60	84	84
6.36422e-07	2.34932e-06	Ubiquitin-dependent degradation of Cyclin D1	Reactome	R-HSA-69229	UBA52; RPS27A; UBB; UBC	7316; 7311; 7314; 6233	7	7
6.36422e-07	2.34932e-06	Ubiquitin-dependent degradation of Cyclin D	Reactome	R-HSA-75815	UBA52; RPS27A; UBB; UBC	7316; 7311; 7314; 6233	7	7
6.36422e-07	2.34932e-06	Vpu mediated degradation of CD4	Reactome	R-HSA-180534	UBA52; RPS27A; UBB; UBC	7316; 7311; 7314; 6233	7	7
6.58975e-07	2.42356e-06	Metabolism	Reactome	R-HSA-1430728	RPS13; RPS11; RPS16; RPL8; RPL9; RPL6; RPL7; RPL5; GAPDH; RPS15A; RPS7; AKT1; RPS3; RPS2; RPS9; RPS8; RPL7A; RPL24; RPL26; RPL21; RPL23; HSP90AB1; RPS3A; RPS27A; RPS20; PRKCA; SP1; KPNB1; SLC25A5; RPL14; RAP1A; RPL12; RPL13; RPS4X; RPL18; CSNK2A1; UBE2I; RPSA; PLCG2; RPLP0; ALB; RPL30; RPL31; UBA52; PRKACA; HSP90AA1; RPL11	207; 6133; 6144; 6130; 6201; 6191; 6210; 5906; 6154; 6132; 6125; 3921; 6233; 292; 2597; 5336; 6156; 6135; 6203; 3326; 6137; 6205; 6202; 6224; 6217; 1457; 213; 6136; 6129; 7311; 3320; 6187; 7329; 3837; 5566; 9349; 9045; 6128; 6207; 6175; 5578; 6189; 6667; 6141; 6152; 6188; 6160	1966	1954
6.88721e-07	2.52361e-06	Apoptosis - Homo sapiens (human)	KEGG	path:hsa04210	TP53; MAPK3; TNFRSF1A; JUN; PARP1; AKT1; MAPK1; IKBKG; NFKB1; ACTB; LMNA	60; 142; 4790; 207; 3725; 8517; 4000; 7157; 5594; 5595; 7132	138	138
7.91573e-07	2.88982e-06	Leukocyte transendothelial migration - Homo sapiens (human)	KEGG	path:hsa04670	VAV1; PTPN11; VCL; RAP1A; CTNNB1; PLCG2; PRKCA; PXN; ACTB; CDC42	60; 5781; 5829; 5336; 7409; 7414; 5906; 998; 5578; 1499	112	112
8.24224e-07	2.998e-06	Regulation of PLK1 Activity at G2/M Transition	Reactome	R-HSA-2565942	RPS27A; TUBB; CDK1; UBA52; PRKACA; UBB; UBC; HSP90AA1; YWHAG	983; 7532; 5566; 7314; 7311; 3320; 7316; 6233; 203068	87	87
8.4547e-07	3.01997e-06	human cytomegalovirus and map kinase pathways	BioCarta	hcmvpathway	AKT1; MAPK1; SP1; RB1; MAPK3	207; 5594; 5595; 5925; 6667	16	16
8.4547e-07	3.01997e-06	hypoxia-inducible factor in the cardivascular system	BioCarta	hifpathway	HSP90AA1; EP300; JUN; COPS5; VHL	3725; 3320; 7428; 2033; 10987	16	16
8.4547e-07	3.01997e-06	cadmium induces dna synthesis and proliferation in macrophages	BioCarta	cdmacpathway	PRKCA; MAPK3; MYC; MAPK1; JUN	5594; 4609; 5595; 3725; 5578	16	16
8.4547e-07	3.01997e-06	NRIF signals cell death from the nucleus	Reactome	R-HSA-205043	UBA52; RPS27A; UBB; TRAF6; UBC	7316; 7189; 7311; 7314; 6233	16	16
8.4547e-07	3.01997e-06	Translesion synthesis by REV1	Reactome	R-HSA-110312	PCNA; UBA52; RPS27A; UBB; UBC	7316; 7311; 7314; 6233; 5111	16	16
8.5411e-07	3.0399e-06	Regulation of actin dynamics for phagocytic cup formation	Reactome	R-HSA-2029482	NCK1; VAV1; GRB2; HSP90AB1; MAPK3; MAPK1; ABL1; HSP90AA1; ACTB; PAK1; CDC42	3320; 998; 5594; 3326; 4690; 60; 5058; 25; 2885; 5595; 7409	141	141
8.59728e-07	3.04896e-06	Nucleotide Excision Repair	Reactome	R-HSA-5696398	UBE2I; PCNA; RPS27A; PARP1; COPS5; UBA52; UBB; UBC; ACTB; EP300	10987; 7316; 60; 7329; 7311; 7314; 5111; 2033; 142; 6233	113	113
9.08965e-07	3.21211e-06	Gap junction - Homo sapiens (human)	KEGG	path:hsa04540	SRC; MAPK3; PRKCA; EGFR; TUBB; CDK1; GRB2; PRKACA; MAPK1	6714; 203068; 2885; 1956; 5566; 5578; 983; 5594; 5595	88	88
9.18515e-07	3.23434e-06	Signaling by WNT	Reactome	R-HSA-195721	YWHAZ; CLTC; PRKCA; RPS27A; CTNNB1; AKT1; UBA52; ARRB2; UBB; UBC; APC; MYC; EP300; SMARCA4; CSNK2A1	409; 6597; 7316; 5578; 207; 2033; 7314; 1457; 4609; 1213; 6233; 7311; 1499; 324; 7534	278	276
9.44582e-07	3.31438e-06	Influenza A - Homo sapiens (human)	KEGG	path:hsa05164	STAT1; MAPK3; PRKCA; HSPA8; JUN; AKT1; MAPK1; IKBKE; NFKB1; ACTB; EP300; TNFRSF1A	60; 6772; 3725; 4790; 207; 3312; 9641; 5578; 5594; 5595; 7132; 2033	173	173
1.00114e-06	3.48817e-06	Host Interactions of HIV factors	Reactome	R-HSA-162909	RPS27A; KPNB1; FYN; SLC25A5; UBA52; UBB; UBC; NPM1; LCK	292; 2534; 4869; 3837; 3932; 7311; 7314; 7316; 6233	89	89
1.00114e-06	3.48817e-06	Signaling by NTRKs	Reactome	R-HSA-166520	SRC; SHC1; GRB2; PTPN11; FYN; RAP1A; MAPK3; MAPK1; CLTC	2534; 6464; 5594; 6714; 5906; 5781; 2885; 5595; 1213	89	89
1.04346e-06	3.62292e-06	DNA Repair	Reactome	R-HSA-73894	UBE2I; BRCA1; EP300; TP53; RPS27A; UBA52; PRKDC; CDK2; PARP1; PCNA; UBB; UBC; ABL1; ACTB; COPS5; XRCC6	1017; 10987; 5591; 2547; 7157; 25; 2033; 60; 7329; 7311; 7314; 672; 5111; 7316; 142; 6233	320	317
1.06745e-06	3.69329e-06	Axon guidance - Homo sapiens (human)	KEGG	path:hsa04360	SRC; NCK1; MAPK3; PRKCA; PTPN11; FYN; ILK; PLCG2; MAPK1; ABL1; PAK1; CDC42	25; 3611; 6714; 4690; 5781; 5336; 2534; 5058; 5578; 5594; 5595; 998	175	175
1.13636e-06	3.90703e-06	Endocytosis - Homo sapiens (human)	KEGG	path:hsa04144	SRC; CLTC; TRAF6; HLA-B; HSPA8; EGFR; HGS; SMAD2; ARRB2; UBB; ARRB1; DAB2; MDM2; CDC42	7189; 3106; 6714; 1601; 4193; 7314; 1213; 3312; 408; 409; 1956; 9146; 998; 4087	244	244
1.13709e-06	3.90703e-06	Signaling by TGF-beta Receptor Complex	Reactome	R-HSA-170834	SNW1; SP1; RPS27A; PARP1; SMAD2; UBA52; UBB; UBC	6667; 22938; 4087; 7316; 7311; 142; 7314; 6233	67	67
1.15403e-06	3.93797e-06	mcalpain and friends in cell motility	BioCarta	mcalpainpathway	SHC1; EGFR; MAPK3; GRB2; PXN; MAPK1	6464; 5595; 1956; 5829; 5594; 2885	30	30
1.15403e-06	3.93797e-06	Mitophagy	Reactome	R-HSA-5205647	SRC; RPS27A; UBA52; UBB; UBC; CSNK2A1	6714; 1457; 7316; 7311; 7314; 6233	30	30
1.18019e-06	3.99345e-06	PCP/CE pathway	Reactome	R-HSA-4086400	CLTC; PRKCA; RPS27A; UBA52; ARRB2; UBB; UBC	5578; 409; 7316; 7311; 1213; 7314; 6233	47	47
1.18019e-06	3.99345e-06	NOTCH1 Intracellular Domain Regulates Transcription	Reactome	R-HSA-2122947	SNW1; RPS27A; UBA52; UBB; UBC; MYC; EP300	22938; 7316; 7311; 4609; 7314; 6233; 2033	47	47
1.18637e-06	3.99345e-06	Translesion synthesis by POLK	Reactome	R-HSA-5655862	PCNA; UBA52; RPS27A; UBB; UBC	7316; 7311; 7314; 6233; 5111	17	17
1.18637e-06	3.99345e-06	Translesion synthesis by POLI	Reactome	R-HSA-5656121	PCNA; UBA52; RPS27A; UBB; UBC	7316; 7311; 7314; 6233; 5111	17	17
1.26114e-06	4.17438e-06	cbl mediated ligand-induced downregulation of egf receptors pathway	BioCarta	cblpathway	PRKCA; SRC; GRB2; EGFR	6714; 1956; 2885; 5578	8	8
1.26114e-06	4.17438e-06	Downregulation of ERBB4 signaling	Reactome	R-HSA-1253288	UBA52; RPS27A; UBB; UBC	7316; 7311; 7314; 6233	8	8
1.26114e-06	4.17438e-06	Ubiquitin Mediated Degradation of Phosphorylated Cdc25A	Reactome	R-HSA-69601	UBA52; RPS27A; UBB; UBC	7316; 7311; 7314; 6233	8	8
1.26114e-06	4.17438e-06	p53-Independent DNA Damage Response	Reactome	R-HSA-69610	UBA52; RPS27A; UBB; UBC	7316; 7311; 7314; 6233	8	8
1.26114e-06	4.17438e-06	p53-Independent G1/S DNA damage checkpoint	Reactome	R-HSA-69613	UBA52; RPS27A; UBB; UBC	7316; 7311; 7314; 6233	8	8
1.27593e-06	4.20929e-06	Constitutive Signaling by Aberrant PI3K in Cancer	Reactome	R-HSA-2219530	SRC; ESR1; VAV1; EGFR; PTPN11; FYN; GRB2; LCK	3932; 5781; 6714; 2534; 2885; 1956; 2099; 7409	68	68
1.28321e-06	4.2193e-06	Apoptosis	Reactome	R-HSA-109581	YWHAZ; TP53; KPNB1; PRKCD; VIM; CTNNB1; AKT1; APC; LMNA; YWHAG	207; 5580; 7157; 7532; 3837; 4000; 324; 1499; 7431; 7534	118	118
1.32779e-06	4.35146e-06	Beta-catenin independent WNT signaling	Reactome	R-HSA-3858494	CLTC; PRKCA; RPS27A; CTNNB1; UBA52; ARRB2; UBB; UBC; MYC	5578; 7311; 7314; 6233; 1499; 409; 7316; 1213; 4609	92	92
1.36811e-06	4.46886e-06	il-2 receptor beta chain in t cell activation	BioCarta	il2rbpathway	PCNA; SHC1; MAPK3; RB1; AKT1; GRB2; MAPK1	207; 5925; 5595; 2885; 5111; 6464; 5594	48	48
1.41712e-06	4.61378e-06	Activated NOTCH1 Transmits Signal to the Nucleus	Reactome	R-HSA-2122948	UBC; RPS27A; UBA52; ARRB2; UBB; ARRB1	409; 7316; 7311; 408; 7314; 6233	32	31
1.45539e-06	4.72288e-06	Small cell lung cancer - Homo sapiens (human)	KEGG	path:hsa05222	TP53; TRAF6; FN1; RB1; AKT1; CDK2; IKBKG; NFKB1; MYC	4609; 7189; 4790; 207; 2335; 5925; 8517; 7157; 1017	93	93
1.61643e-06	5.21188e-06	Programmed Cell Death	Reactome	R-HSA-5357801	YWHAZ; TP53; KPNB1; PRKCD; VIM; CTNNB1; AKT1; APC; LMNA; YWHAG	207; 5580; 7157; 7532; 3837; 4000; 324; 1499; 7431; 7534	121	121
1.62707e-06	5.21188e-06	nerve growth factor pathway (ngf)	BioCarta	ngfpathway	MAPK3; GRB2; JUN; SHC1; CSNK2A1	6464; 5595; 3725; 2885; 1457	18	18
1.62707e-06	5.21188e-06	atm signaling pathway	BioCarta	atmpathway	ABL1; JUN; MDM2; TP53; BRCA1	7157; 4193; 3725; 25; 672	18	18
1.62707e-06	5.21188e-06	SCF(Skp2)-mediated degradation of p27/p21	Reactome	R-HSA-187577	UBA52; RPS27A; CDK2; UBB; UBC	7316; 7311; 7314; 6233; 1017	18	18
1.87839e-06	5.99756e-06	Platelet activation - Homo sapiens (human)	KEGG	path:hsa04611	SRC; LYN; AKT1; FYN; RAP1A; PLCG2; MAPK1; PRKACA; ACTB; MAPK3	6714; 60; 207; 5336; 5906; 5566; 5594; 5595; 4067; 2534	123	123
2.01312e-06	6.40714e-06	Ub-specific processing proteases	Reactome	R-HSA-5689880	ARRB1; TP53; TRAF6; RPS27A; HGS; SMAD2; UBA52; ARRB2; IKBKG; UBB; UBC; MDM2; MYC	6233; 4193; 408; 7316; 7157; 7314; 9146; 8517; 7311; 7189; 409; 4087; 4609	220	220
2.09062e-06	6.63255e-06	integrin signaling pathway	BioCarta	integrinpathway	SRC; SHC1; FYN; VCL; GRB2; PXN	2885; 6714; 2534; 5829; 6464; 7414	33	33
2.17658e-06	6.87308e-06	Oxidative Stress Induced Senescence	Reactome	R-HSA-2559580	TP53; RPS27A; JUN; MAPK3; UBA52; MAPK1; UBB; UBC; MOV10; MDM2	3725; 5594; 4193; 7316; 7157; 7314; 4343; 7311; 5595; 6233	126	125
2.1872e-06	6.87308e-06	Gastrin-CREB signalling pathway via PKC and MAPK	Reactome	R-HSA-881907	PRKCA; MAPK3; MAPK1; EGFR; GRB2	5594; 5595; 2885; 1956; 5578	19	19
2.1872e-06	6.87308e-06	Translesion Synthesis by POLH	Reactome	R-HSA-110320	PCNA; UBA52; RPS27A; UBB; UBC	7316; 7311; 7314; 6233; 5111	19	19
2.2492e-06	7.04559e-06	Regulation of PTEN localization	Reactome	R-HSA-8948747	UBA52; RPS27A; UBB; UBC	7316; 7311; 7314; 6233	9	9
2.27279e-06	7.0971e-06	TCF dependent signaling in response to WNT	Reactome	R-HSA-201681	YWHAZ; RPS27A; CTNNB1; AKT1; UBA52; UBB; UBC; APC; MYC; EP300; SMARCA4; CSNK2A1	207; 6597; 7534; 7314; 2033; 7311; 1457; 4609; 1499; 7316; 324; 6233	190	188
2.45056e-06	7.62822e-06	EPH-Ephrin signaling	Reactome	R-HSA-2682334	MYH10; SRC; MYH9; FYN; PAK1; LYN; ACTB; CDC42	4067; 6714; 2534; 4628; 998; 4627; 60; 5058	74	74
2.46644e-06	7.65367e-06	Cellular response to heat stress	Reactome	R-HSA-3371556	HSPA5; EEF1A1; HSPA8; HSP90AB1; MAPK3; MAPK1; UBB; HSP90AA1; EP300	5594; 3309; 3326; 2033; 7314; 3312; 5595; 3320; 1915	99	99
2.72624e-06	8.4335e-06	hiv-1 nef: negative effector of fas and tnf	BioCarta	hivnefpathway	TNFRSF1A; PRKCD; PARP1; RB1; PRKDC; LMNA; MDM2	5925; 7132; 5591; 4000; 4193; 142; 5580	53	53
2.88859e-06	8.8804e-06	Signaling by NTRK2 (TRKB)	Reactome	R-HSA-9006115	SRC; PTPN11; GRB2; FYN; SHC1	5781; 6464; 6714; 2885; 2534	20	20
2.88859e-06	8.8804e-06	egf signaling pathway	BioCarta	egfpathway	PRKCA; GRB2; EGFR; SHC1; STAT1	6772; 5578; 6464; 2885; 1956	20	20
3.00476e-06	9.15459e-06	EPHB-mediated forward signaling	Reactome	R-HSA-3928662	SRC; ACTB; FYN; LYN; PAK1; CDC42	4067; 6714; 998; 60; 2534; 5058	35	35
3.00476e-06	9.15459e-06	RET signaling	Reactome	R-HSA-8853659	SRC; SHC1; PRKCA; PTPN11; GRB2; PRKACA	5578; 6464; 6714; 5566; 2885; 5781	35	35
3.00543e-06	9.15459e-06	Recruitment and ATM-mediated phosphorylation of repair and signaling proteins at DNA double strand breaks	Reactome	R-HSA-5693565	UBE2I; BRCA1; TP53; RPS27A; UBA52; UBB; UBC; ABL1	7157; 7329; 25; 672; 7316; 7311; 7314; 6233	77	76
3.10152e-06	9.30456e-06	Constitutive Signaling by NOTCH1 PEST Domain Mutants	Reactome	R-HSA-2644606	SNW1; RPS27A; UBA52; UBB; UBC; MYC; EP300	22938; 6233; 7316; 7311; 4609; 7314; 2033	54	54
3.10152e-06	9.30456e-06	Signaling by NOTCH1 PEST Domain Mutants in Cancer	Reactome	R-HSA-2644602	SNW1; RPS27A; UBA52; UBB; UBC; MYC; EP300	22938; 6233; 7316; 7311; 4609; 7314; 2033	54	54
3.10152e-06	9.30456e-06	Constitutive Signaling by NOTCH1 HD+PEST Domain Mutants	Reactome	R-HSA-2894862	SNW1; RPS27A; UBA52; UBB; UBC; MYC; EP300	22938; 6233; 7316; 7311; 4609; 7314; 2033	54	54
3.10152e-06	9.30456e-06	Signaling by NOTCH1 HD+PEST Domain Mutants in Cancer	Reactome	R-HSA-2894858	SNW1; RPS27A; UBA52; UBB; UBC; MYC; EP300	22938; 6233; 7316; 7311; 4609; 7314; 2033	54	54
3.10152e-06	9.30456e-06	Signaling by NOTCH1 in Cancer	Reactome	R-HSA-2644603	SNW1; RPS27A; UBA52; UBB; UBC; MYC; EP300	22938; 7316; 7311; 4609; 7314; 6233; 2033	54	54
3.16684e-06	9.44347e-06	L1CAM interactions	Reactome	R-HSA-373760	SRC; HSPA8; EGFR; MAPK3; MAPK1; CSNK2A1; CLTC; PAK1; SPTBN1	1956; 1457; 5594; 6711; 3312; 6714; 5058; 5595; 1213	103	102
3.16684e-06	9.44347e-06	Chagas disease (American trypanosomiasis) - Homo sapiens (human)	KEGG	path:hsa05142	TRAF6; MAPK3; TNFRSF1A; JUN; SMAD2; AKT1; MAPK1; IKBKG; NFKB1	7189; 3725; 4790; 207; 8517; 5594; 5595; 7132; 4087	102	102
3.32066e-06	9.87251e-06	DNA Double Strand Break Response	Reactome	R-HSA-5693606	UBE2I; BRCA1; TP53; RPS27A; UBA52; UBB; UBC; ABL1	7157; 7329; 25; 672; 7316; 7311; 7314; 6233	78	77
3.50843e-06	1.03996e-05	Transcriptional regulation by RUNX1	Reactome	R-HSA-8878171	SRC; MOV10; ESR1; PTPN11; RPS27A; UBA52; UBB; UBC; ABL1; EP300; SMARCA4; CSNK2A1	1457; 7316; 2033; 6714; 4343; 2099; 7314; 5781; 6597; 25; 7311; 6233	198	196
3.57079e-06	1.05216e-05	Metalloprotease DUBs	Reactome	R-HSA-5689901	BRCA1; RPS27A; UBA52; UBB; UBC; EP300	672; 7316; 7311; 7314; 6233; 2033	36	36
3.57079e-06	1.05216e-05	Regulation of APC/C activators between G1/S and early anaphase	Reactome	R-HSA-176408	RPS27A; UBA52; CDK1; CDK2; UBB; UBC	1017; 983; 7316; 7311; 7314; 6233	36	36
3.71423e-06	1.0717e-05	overview of telomerase protein component gene htert transcriptional regulation	BioCarta	tertpathway	SP1; MYC; TP53; ESR1	4609; 2099; 7157; 6667	10	10
3.71423e-06	1.0717e-05	Signal attenuation	Reactome	R-HSA-74749	GRB2; MAPK1; SHC1; MAPK3	6464; 5594; 2885; 5595	10	10
3.71423e-06	1.0717e-05	regulation of splicing through sam68	BioCarta	sam68pathway	SRC; MAPK1; CDK1; MAPK3	6714; 5594; 5595; 983	10	10
3.71423e-06	1.0717e-05	Degradation of AXIN	Reactome	R-HSA-4641257	UBA52; RPS27A; UBB; UBC	7316; 7311; 6233; 7314	10	10
3.71423e-06	1.0717e-05	SCF-beta-TrCP mediated degradation of Emi1	Reactome	R-HSA-174113	UBA52; RPS27A; UBB; UBC	7316; 7311; 7314; 6233	10	10
3.71423e-06	1.0717e-05	Vif-mediated degradation of APOBEC3G	Reactome	R-HSA-180585	UBA52; RPS27A; UBB; UBC	7316; 7311; 7314; 6233	10	10
3.71423e-06	1.0717e-05	FBXL7 down-regulates AURKA during mitotic entry and in early mitosis	Reactome	R-HSA-8854050	UBA52; RPS27A; UBB; UBC	7316; 7314; 6233; 7311	10	10
3.72344e-06	1.0717e-05	Toll-like receptor signaling pathway - Homo sapiens (human)	KEGG	path:hsa04620	TRAF6; STAT1; MAPK3; JUN; AKT1; MAPK1; IKBKG; IKBKE; NFKB1	7189; 6772; 3725; 4790; 207; 8517; 9641; 5594; 5595	104	104
3.75529e-06	1.07775e-05	Oxygen-dependent proline hydroxylation of Hypoxia-inducible Factor Alpha	Reactome	R-HSA-1234176	VHL; UBA52; RPS27A; UBB; UBC	7316; 7314; 6233; 7428; 7311	21	21
3.8206e-06	1.09333e-05	Measles - Homo sapiens (human)	KEGG	path:hsa05162	TP53; TRAF6; STAT1; HSPA8; FYN; AKT1; CDK2; IKBKE; NFKB1; CSNK2A1	7189; 6772; 4790; 207; 3312; 9641; 1457; 1017; 2534; 7157	134	133
4.22063e-06	1.20434e-05	Platelet Aggregation (Plug Formation)	Reactome	R-HSA-76009	SRC; SHC1; FN1; RAP1A; AKT1; GRB2	207; 6714; 2885; 6464; 5906; 2335	37	37
4.77244e-06	1.35789e-05	NOD-like receptor signaling pathway - Homo sapiens (human)	KEGG	path:hsa04621	TRAF6; STAT1; JUN; PRKCD; HSP90AA1; HSP90AB1; MAPK3; MAPK1; IKBKG; IKBKE; NFKB1	7189; 6772; 3725; 4790; 3326; 8517; 9641; 5580; 3320; 5594; 5595	168	168
4.81368e-06	1.35795e-05	SHC1 events in ERBB2 signaling	Reactome	R-HSA-1250196	PRKCA; GRB2; EGFR; SHC1; PRKCD	5578; 1956; 2885; 6464; 5580	22	22
4.81368e-06	1.35795e-05	Signal transduction by L1	Reactome	R-HSA-445144	MAPK3; MAPK1; EGFR; PAK1; CSNK2A1	5594; 5595; 1956; 1457; 5058	22	22
4.81368e-06	1.35795e-05	hypoxia and p53 in the cardiovascular system	BioCarta	p53hypoxiapathway	AKT1; MDM2; EP300; TP53; HSP90AA1	7157; 207; 3320; 4193; 2033	22	22
4.96347e-06	1.39624e-05	Hedgehog ,on, state	Reactome	R-HSA-5632684	UBC; RPS27A; UBA52; ARRB2; UBB; ARRB1	6233; 409; 7316; 7311; 408; 7314	39	38
5.49567e-06	1.54158e-05	FCERI mediated MAPK activation	Reactome	R-HSA-2871796	SHC1; MAPK3; VAV1; GRB2; JUN; PLCG2; MAPK1; LYN; PAK1	4067; 5336; 3725; 6464; 5594; 5058; 2885; 5595; 7409	109	109
5.67817e-06	1.58829e-05	Homology Directed Repair	Reactome	R-HSA-5693538	UBE2I; BRCA1; RPS27A; UBA52; PARP1; CDK2; PCNA; UBB; UBC; ABL1	1017; 7316; 7329; 25; 7311; 7314; 672; 5111; 142; 6233	141	139
5.78304e-06	1.60407e-05	The role of GTSE1 in G2/M progression after G2 checkpoint	Reactome	R-HSA-8852276	HSP90AB1; HSP90AA1; TP53; CDK1	7157; 3320; 3326; 983	11	11
5.78304e-06	1.60407e-05	Hh mutants that don,t undergo autocatalytic processing are degraded by ERAD	Reactome	R-HSA-5362768	UBA52; RPS27A; UBB; UBC	7316; 7311; 7314; 6233	11	11
5.78304e-06	1.60407e-05	Hh mutants abrogate ligand secretion	Reactome	R-HSA-5387390	UBA52; RPS27A; UBB; UBC	7316; 7311; 7314; 6233	11	11
6.09247e-06	1.68051e-05	Regulation of Hypoxia-inducible Factor (HIF) by oxygen	Reactome	R-HSA-1234174	VHL; UBA52; RPS27A; UBB; UBC	7428; 7311; 7316; 7314; 6233	23	23
6.09247e-06	1.68051e-05	Cellular response to hypoxia	Reactome	R-HSA-2262749	VHL; UBA52; RPS27A; UBB; UBC	7428; 7311; 7316; 7314; 6233	23	23
6.38435e-06	1.75614e-05	Senescence-Associated Secretory Phenotype (SASP)	Reactome	R-HSA-2559582	RPS27A; JUN; UBA52; MAPK3; CDK2; MAPK1; UBB; UBC; NFKB1	3725; 1017; 5594; 7314; 4790; 7311; 5595; 7316; 6233	112	111
6.7681e-06	1.85144e-05	CLEC7A (Dectin-1) signaling	Reactome	R-HSA-5607764	SRC; TRAF6; PRKCD; PLCG2; IKBKG; NFKB1	5336; 4790; 7189; 6714; 8517; 5580	40	40
6.7681e-06	1.85144e-05	Negative regulation of MAPK pathway	Reactome	R-HSA-5675221	RPS27A; MAPK3; UBA52; MAPK1; UBB; UBC	5595; 7316; 7311; 5594; 7314; 6233	40	40
7.39342e-06	2.01694e-05	Toxoplasmosis - Homo sapiens (human)	KEGG	path:hsa05145	TRAF6; STAT1; MAPK3; HSPA8; AKT1; MAPK1; IKBKG; NFKB1; TNFRSF1A	7189; 6772; 4790; 207; 3312; 8517; 5594; 5595; 7132	113	113
7.62276e-06	2.06814e-05	APC/C:Cdc20 mediated degradation of Cyclin B	Reactome	R-HSA-174048	CDK1; UBA52; RPS27A; UBB; UBC	983; 7316; 7311; 7314; 6233	24	24
7.62276e-06	2.06814e-05	RUNX2 regulates osteoblast differentiation	Reactome	R-HSA-8940973	ABL1; SRC; MAPK1; RB1; MAPK3	5925; 6714; 5595; 25; 5594	24	24
7.65606e-06	2.07152e-05	Salmonella infection - Homo sapiens (human)	KEGG	path:hsa05132	MYH10; MYH9; JUN; MAPK3; MAPK1; NFKB1; ACTB; CDC42	4627; 4628; 60; 3725; 4790; 5594; 5595; 998	86	86
7.85161e-06	2.10152e-05	APC/C-mediated degradation of cell cycle proteins	Reactome	R-HSA-174143	RPS27A; CDK2; CDK1; UBA52; UBB; UBC	983; 7316; 7311; 1017; 7314; 6233	41	41
7.85161e-06	2.10152e-05	Regulation of mitotic cell cycle	Reactome	R-HSA-453276	RPS27A; CDK2; CDK1; UBA52; UBB; UBC	983; 7316; 7311; 1017; 7314; 6233	41	41
7.85161e-06	2.10152e-05	Dual Incision in GG-NER	Reactome	R-HSA-5696400	PCNA; RPS27A; PARP1; UBA52; UBB; UBC	5111; 7316; 7311; 142; 7314; 6233	41	41
7.85161e-06	2.10152e-05	Netrin-1 signaling	Reactome	R-HSA-373752	SRC; NCK1; PTPN11; FYN; PAK1; CDC42	5781; 998; 4690; 6714; 2534; 5058	41	41
8.27233e-06	2.20818e-05	Phospholipase D signaling pathway - Homo sapiens (human)	KEGG	path:hsa04072	SHC1; MAPK3; PRKCA; FYN; PTPN11; EGFR; PLCG2; AKT1; GRB2; MAPK1	5781; 207; 5336; 5595; 6464; 2885; 1956; 5578; 5594; 2534	146	145
8.59493e-06	2.28202e-05	Josephin domain DUBs	Reactome	R-HSA-5689877	UBA52; RPS27A; UBB; UBC	7316; 7311; 7314; 6233	12	12
8.59493e-06	2.28202e-05	Degradation of DVL	Reactome	R-HSA-4641258	UBA52; RPS27A; UBB; UBC	7316; 7311; 7314; 6233	12	12
9.43811e-06	2.48595e-05	regulation of eif-4e and p70s6 kinase	BioCarta	eif4pathway	PRKCA; AKT1; MAPK1; PABPC1; MAPK3	207; 5578; 5595; 26986; 5594	25	25
9.43811e-06	2.48595e-05	Gap-filling DNA repair synthesis and ligation in GG-NER	Reactome	R-HSA-5696397	PCNA; UBA52; RPS27A; UBB; UBC	5111; 7316; 7311; 7314; 6233	25	25
9.43811e-06	2.48595e-05	cell cycle: g1/s check point	BioCarta	g1pathway	ABL1; CDK1; CDK2; TP53; RB1	7157; 5925; 1017; 983; 25	25	25
1.04406e-05	2.74273e-05	Formation of Incision Complex in GG-NER	Reactome	R-HSA-5696395	UBE2I; RPS27A; PARP1; UBA52; UBB; UBC	7329; 7316; 7311; 142; 7314; 6233	43	43
1.06379e-05	2.78718e-05	M Phase	Reactome	R-HSA-68886	MAPK3; PRKCA; RPS27A; TUBB; RB1; CDK1; UBA52; MAPK1; PRKACA; UBB; UBC; HSP90AA1; LMNA; YWHAG; CSNK2A1	5925; 5594; 983; 1457; 5578; 7314; 4000; 5566; 7532; 7311; 5595; 3320; 7316; 6233; 203068	338	337
1.15745e-05	3.01666e-05	Orc1 removal from chromatin	Reactome	R-HSA-68949	CDK2; RPS27A; UBA52; UBB; UBC	1017; 7316; 7311; 7314; 6233	26	26
1.15745e-05	3.01666e-05	Downregulation of TGF-beta receptor signaling	Reactome	R-HSA-2173788	UBA52; RPS27A; UBB; SMAD2; UBC	4087; 7316; 7311; 7314; 6233	26	26
1.20404e-05	3.12988e-05	RHO GTPase Effectors	Reactome	R-HSA-195258	MYH10; YWHAZ; NCK1; SRC; MYH9; YWHAG; CTNNB1; MAPK3; GRB2; ABL1; MAPK1; ACTB; PAK1; CDC42	5594; 998; 4628; 2885; 7534; 6714; 4690; 5058; 60; 7532; 25; 5595; 4627; 1499	300	299
1.21168e-05	3.14152e-05	Acute myeloid leukemia - Homo sapiens (human)	KEGG	path:hsa05221	MAPK3; AKT1; GRB2; IKBKG; NFKB1; MAPK1; MYC	4609; 2885; 8517; 207; 5594; 5595; 4790	66	66
1.2301e-05	3.14816e-05	Constitutive Signaling by EGFRvIII	Reactome	R-HSA-5637810	HSP90AA1; GRB2; EGFR; SHC1	1956; 6464; 2885; 3320	13	13
1.2301e-05	3.14816e-05	Signaling by EGFRvIII in Cancer	Reactome	R-HSA-5637812	HSP90AA1; GRB2; EGFR; SHC1	1956; 6464; 2885; 3320	13	13
1.2301e-05	3.14816e-05	trka receptor signaling pathway	BioCarta	trkapathway	PRKCA; AKT1; GRB2; SHC1	6464; 2885; 5578; 207	13	13
1.2301e-05	3.14816e-05	rb tumor suppressor/checkpoint signaling in response to dna damage	BioCarta	rbpathway	CDK1; CDK2; TP53; RB1	7157; 983; 5925; 1017	13	13
1.2301e-05	3.14816e-05	Receptor-ligand binding initiates the second proteolytic cleavage of Notch receptor	Reactome	R-HSA-156988	UBA52; RPS27A; UBB; UBC	7316; 7311; 7314; 6233	13	13
1.24548e-05	3.17934e-05	Vesicle-mediated transport	Reactome	R-HSA-5653656	YWHAZ; SRC; HSP90AA1; UBC; EGFR; HSPA8; ALB; HGS; HSP90B1; COPS5; AKT1; UBA52; GRB2; ARRB2; CLTC; ARRB1; DAB2; YWHAG; RPS27A; UBB; SPTBN1	207; 10987; 408; 3312; 6714; 2885; 7316; 213; 1601; 7184; 9146; 7311; 3320; 409; 1213; 7314; 6233; 1956; 6711; 7532; 7534	620	620
1.36804e-05	3.48325e-05	DAP12 interactions	Reactome	R-HSA-2172127	SHC1; HLA-B; FYN; PLCG2; GRB2; LCK	5336; 2534; 6464; 2885; 3106; 3932	45	45
1.40633e-05	3.5552e-05	Cushing,s syndrome - Homo sapiens (human)	KEGG	path:hsa04934	SP1; EGFR; RB1; CTNNB1; MAPK3; CDK2; MAPK1; PRKACA; RAP1A; APC	6667; 5906; 1499; 5925; 324; 1956; 5566; 5594; 5595; 1017	154	154
1.40704e-05	3.5552e-05	VEGFR2 mediated vascular permeability	Reactome	R-HSA-5218920	CTNNB1; AKT1; PAK1; VAV1; HSP90AA1	207; 1499; 3320; 7409; 5058	27	27
1.40704e-05	3.5552e-05	role of erk5 in neuronal survival pathway	BioCarta	erk5pathway	AKT1; GRB2; SHC1; MAPK1; MAPK3	207; 5595; 2885; 6464; 5594	27	27
1.47447e-05	3.71611e-05	Cell-Cell communication	Reactome	R-HSA-1500931	SRC; NCK1; PTPN11; FYN; ILK; CTNNB1; GRB2; PXN; SPTBN1	2534; 5829; 3611; 6714; 4690; 5781; 2885; 6711; 1499	124	123
1.58672e-05	3.9889e-05	pelp1 modulation of estrogen receptor activity	BioCarta	pelp1pathway	SRC; EP300; ESR1	2099; 6714; 2033	5	5
1.69669e-05	4.2149e-05	Cdc20:Phospho-APC/C mediated degradation of Cyclin A	Reactome	R-HSA-174184	CDK1; UBA52; RPS27A; UBB; UBC	983; 7316; 7311; 7314; 6233	28	28
1.69669e-05	4.2149e-05	Attenuation phase	Reactome	R-HSA-3371568	HSP90AB1; HSP90AA1; EP300; HSPA8; UBB	7314; 3320; 3326; 2033; 3312	28	28
1.69669e-05	4.2149e-05	CDK-mediated phosphorylation and removal of Cdc6	Reactome	R-HSA-69017	UBA52; RPS27A; CDK2; UBB; UBC	7316; 7311; 1017; 7314; 6233	28	28
1.70634e-05	4.2149e-05	phosphorylation of mek1 by cdk5/p35 down regulates the map kinase pathway	BioCarta	cdk5pathway	MAPK3; MAPK1; SHC1; GRB2	6464; 5594; 5595; 2885	14	14
1.70634e-05	4.2149e-05	CDT1 association with the CDC6:ORC:origin complex	Reactome	R-HSA-68827	UBA52; RPS27A; UBB; UBC	7316; 7311; 7314; 6233	14	14
1.70634e-05	4.2149e-05	Membrane binding and targetting of GAG proteins	Reactome	R-HSA-174490	UBA52; RPS27A; UBB; UBC	7316; 7311; 7314; 6233	14	14
1.70634e-05	4.2149e-05	Synthesis And Processing Of GAG, GAGPOL Polyproteins	Reactome	R-HSA-174495	UBA52; RPS27A; UBB; UBC	7316; 7311; 7314; 6233	14	14
1.73217e-05	4.2681e-05	Signaling by TGF-beta family members	Reactome	R-HSA-9006936	SNW1; SP1; RPS27A; PARP1; SMAD2; UBA52; UBB; UBC	6667; 7314; 7311; 22938; 4087; 7316; 142; 6233	96	96
1.96321e-05	4.82541e-05	HIV Infection	Reactome	R-HSA-162906	RPS27A; SSRP1; KPNB1; FYN; SLC25A5; UBA52; UBB; UBC; NPM1; LCK; XRCC6	2534; 2547; 4869; 3932; 7311; 7314; 6749; 3837; 292; 7316; 6233	197	195
2.03075e-05	4.96683e-05	APC:Cdc20 mediated degradation of cell cycle proteins prior to satisfation of the cell cycle checkpoint	Reactome	R-HSA-179419	CDK1; UBA52; RPS27A; UBB; UBC	983; 7316; 7311; 7314; 6233	29	29
2.03075e-05	4.96683e-05	Downstream signal transduction	Reactome	R-HSA-186763	SRC; PTPN11; GRB2; NCK1; STAT1	6772; 5781; 6714; 4690; 2885	29	29
2.16041e-05	5.27017e-05	Melanoma - Homo sapiens (human)	KEGG	path:hsa05218	TP53; MAPK3; EGFR; RB1; AKT1; MAPK1; MDM2	207; 5925; 1956; 5594; 5595; 4193; 7157	72	72
2.17069e-05	5.27017e-05	Progesterone-mediated oocyte maturation - Homo sapiens (human)	KEGG	path:hsa04914	CDK1; HSP90AB1; AKT1; CDK2; MAPK1; PRKACA; HSP90AA1; MAPK3	207; 3320; 3326; 5566; 983; 5594; 5595; 1017	99	99
2.17069e-05	5.27017e-05	Choline metabolism in cancer - Homo sapiens (human)	KEGG	path:hsa05231	MAPK3; PRKCA; SP1; EGFR; JUN; AKT1; GRB2; MAPK1	6667; 3725; 5578; 207; 2885; 1956; 5594; 5595	99	99
2.30548e-05	5.46383e-05	DCC mediated attractive signaling	Reactome	R-HSA-418885	SRC; FYN; NCK1; CDC42	2534; 6714; 998; 4690	15	15
2.30548e-05	5.46383e-05	GRB2:SOS provides linkage to MAPK signaling for Integrins	Reactome	R-HSA-354194	SRC; GRB2; FN1; RAP1A	5906; 2885; 2335; 6714	15	15
2.30548e-05	5.46383e-05	pten dependent cell cycle arrest and apoptosis	BioCarta	ptenpathway	AKT1; GRB2; SHC1; ILK	6464; 207; 3611; 2885	15	15
2.30548e-05	5.46383e-05	Signaling by EGFR in Cancer	Reactome	R-HSA-1643713	HSP90AA1; GRB2; EGFR; SHC1	6464; 2885; 3320; 1956	15	15
2.30548e-05	5.46383e-05	Constitutive Signaling by Ligand-Responsive EGFR Cancer Variants	Reactome	R-HSA-1236382	HSP90AA1; GRB2; EGFR; SHC1	6464; 3320; 2885; 1956	15	15
2.30548e-05	5.46383e-05	Signaling by Ligand-Responsive EGFR Variants in Cancer	Reactome	R-HSA-5637815	HSP90AA1; GRB2; EGFR; SHC1	6464; 3320; 2885; 1956	15	15
2.30548e-05	5.46383e-05	estrogen responsive protein efp controls cell cycle and breast tumors growth	BioCarta	efppathway	CDK1; CDK2; TP53; ESR1	7157; 2099; 1017; 983	15	15
2.30548e-05	5.46383e-05	Constitutive Signaling by NOTCH1 HD Domain Mutants	Reactome	R-HSA-2691232	UBA52; RPS27A; UBB; UBC	7316; 7311; 7314; 6233	15	15
2.30548e-05	5.46383e-05	Signaling by NOTCH1 HD Domain Mutants in Cancer	Reactome	R-HSA-2691230	UBA52; RPS27A; UBB; UBC	7316; 7311; 7314; 6233	15	15
2.30548e-05	5.46383e-05	Regulation of innate immune responses to cytosolic DNA	Reactome	R-HSA-3134975	UBA52; RPS27A; UBB; UBC	7316; 7311; 7314; 6233	15	15
2.41382e-05	5.70695e-05	DAP12 signaling	Reactome	R-HSA-2424491	PLCG2; GRB2; FYN; LCK; SHC1	5336; 3932; 2534; 2885; 6464	30	30
2.44511e-05	5.7672e-05	FoxO signaling pathway - Homo sapiens (human)	KEGG	path:hsa04068	MAPK3; EGFR; SMAD2; AKT1; CDK2; GRB2; MAPK1; MDM2; EP300	4193; 207; 2885; 1956; 2033; 1017; 5594; 5595; 4087	132	131
2.75873e-05	6.49152e-05	HDR through Homologous Recombination (HR) or Single Strand Annealing (SSA)	Reactome	R-HSA-5693567	UBE2I; BRCA1; RPS27A; UBA52; CDK2; PCNA; UBB; UBC; ABL1	1017; 7316; 7329; 25; 7311; 7314; 672; 5111; 6233	135	133
2.85076e-05	6.65168e-05	APC/C:Cdc20 mediated degradation of mitotic proteins	Reactome	R-HSA-176409	CDK1; UBA52; RPS27A; UBB; UBC	983; 7316; 7311; 7314; 6233	31	31
2.85076e-05	6.65168e-05	Recognition of DNA damage by PCNA-containing replication complex	Reactome	R-HSA-110314	PCNA; UBA52; RPS27A; UBB; UBC	5111; 7316; 7311; 7314; 6233	31	31
2.85076e-05	6.65168e-05	erk and pi-3 kinase are necessary for collagen binding in corneal epithelia	BioCarta	ecmpathway	SRC; MAPK1; VCL; PXN; MAPK3	7414; 6714; 5595; 5829; 5594	31	31
2.85359e-05	6.65168e-05	TP53 Regulates Transcription of Cell Cycle Genes	Reactome	R-HSA-6791312	PCNA; TP53; CDK1; CDK2; EP300; NPM1	7157; 983; 5111; 1017; 2033; 4869	51	51
2.89716e-05	6.73742e-05	S Phase	Reactome	R-HSA-69242	PCNA; RPS27A; UBA52; RB1; AKT1; CDK2; UBB; UBC	207; 1017; 5925; 7311; 7314; 5111; 7316; 6233	103	103
3.04579e-05	7.03366e-05	Sema3A PAK dependent Axon repulsion	Reactome	R-HSA-399954	HSP90AB1; HSP90AA1; FYN; PAK1	3320; 3326; 5058; 2534	16	16
3.04579e-05	7.03366e-05	TGF-beta receptor signaling in EMT (epithelial to mesenchymal transition)	Reactome	R-HSA-2173791	UBA52; RPS27A; UBB; UBC	7316; 7311; 7314; 6233	16	16
3.04579e-05	7.03366e-05	Defective CFTR causes cystic fibrosis	Reactome	R-HSA-5678895	UBA52; RPS27A; UBB; UBC	7316; 7311; 7314; 6233	16	16
3.08239e-05	7.10166e-05	Signaling by NTRK1 (TRKA)	Reactome	R-HSA-187037	SRC; SHC1; RAP1A; MAPK3; GRB2; CLTC; MAPK1	6714; 5595; 2885; 6464; 5594; 1213; 5906	76	76
3.19463e-05	7.34321e-05	Apoptotic execution phase	Reactome	R-HSA-75153	KPNB1; PRKCD; VIM; CTNNB1; APC; LMNA	3837; 4000; 1499; 7431; 324; 5580	52	52
3.34669e-05	7.58736e-05	Activation of APC/C and APC/C:Cdc20 mediated degradation of mitotic proteins	Reactome	R-HSA-176814	CDK1; UBA52; RPS27A; UBB; UBC	983; 7316; 7311; 7314; 6233	32	32
3.34669e-05	7.58736e-05	TGF-beta receptor signaling activates SMADs	Reactome	R-HSA-2173789	UBA52; RPS27A; UBB; SMAD2; UBC	4087; 7316; 7311; 7314; 6233	32	32
3.34669e-05	7.58736e-05	Termination of translesion DNA synthesis	Reactome	R-HSA-5656169	PCNA; UBA52; RPS27A; UBB; UBC	5111; 7316; 7311; 7314; 6233	32	32
3.34669e-05	7.58736e-05	RUNX2 regulates bone development	Reactome	R-HSA-8941326	ABL1; SRC; MAPK1; RB1; MAPK3	5925; 6714; 5595; 25; 5594	32	32
3.34669e-05	7.58736e-05	Thrombin signalling through proteinase activated receptors (PARs)	Reactome	R-HSA-456926	ARRB1; SRC; MAPK1; ARRB2; MAPK3	6714; 5595; 409; 5594; 408	32	32
3.34669e-05	7.58736e-05	Endosomal Sorting Complex Required For Transport (ESCRT)	Reactome	R-HSA-917729	UBA52; RPS27A; HGS; UBB; UBC	9146; 7316; 7311; 7314; 6233	32	32
3.69563e-05	8.35936e-05	Death Receptor Signalling	Reactome	R-HSA-73887	TRAF6; TNFRSF1A; VAV1; RPS27A; UBA52; IKBKG; UBB; UBC; NFKB1	7132; 4790; 8517; 7311; 7314; 7189; 7316; 6233; 7409	141	138
3.90698e-05	8.81735e-05	Signaling by NOTCH2	Reactome	R-HSA-1980145	EP300; UBA52; RPS27A; UBB; UBC	6233; 7316; 7311; 7314; 2033	33	33
3.94646e-05	8.84612e-05	ABC transporter disorders	Reactome	R-HSA-5619084	UBA52; RPS27A; UBB; UBC	7316; 7311; 7314; 6233	17	17
3.94646e-05	8.84612e-05	Disorders of transmembrane transporters	Reactome	R-HSA-5619115	UBA52; RPS27A; UBB; UBC	7316; 7311; 7314; 6233	17	17
3.94646e-05	8.84612e-05	Assembly Of The HIV Virion	Reactome	R-HSA-175474	UBA52; RPS27A; UBB; UBC	7316; 7311; 7314; 6233	17	17
4.66729e-05	0.000104149	Signaling by Hedgehog	Reactome	R-HSA-5358351	RPS27A; UBC; UBA52; PRKACA; UBB; ARRB1; ARRB2	409; 5566; 7316; 7311; 408; 7314; 6233	82	81
4.66729e-05	0.000104149	Transcription-Coupled Nucleotide Excision Repair (TC-NER)	Reactome	R-HSA-6781827	PCNA; RPS27A; COPS5; UBA52; UBB; UBC; EP300	10987; 5111; 7316; 7311; 7314; 6233; 2033	81	81
4.71124e-05	0.000104894	Signaling by Rho GTPases	Reactome	R-HSA-194315	MYH10; SRC; YWHAZ; NCK1; VAV1; YWHAG; GRB2; MYH9; PAK1; CTNNB1; MAPK3; MAPK1; ABL1; ACTB; A2M; CDC42	6714; 998; 5595; 2; 1499; 4690; 60; 5058; 7409; 5594; 25; 4627; 4628; 7532; 2885; 7534	434	429
4.89954e-05	0.000108629	Tuberculosis - Homo sapiens (human)	KEGG	path:hsa05152	SRC; TRAF6; STAT1; AKT1; TNFRSF1A; HSPD1; MAPK1; NFKB1; EP300; MAPK3	7189; 6714; 6772; 4790; 207; 3329; 5594; 5595; 7132; 2033	179	178
4.90089e-05	0.000108629	DDX58/IFIH1-mediated induction of interferon-alpha/beta	Reactome	R-HSA-168928	DHX9; TRAF6; IKBKG; IKBKE; NFKB1; EP300	4790; 9641; 7189; 8517; 1660; 2033	56	56
5.02753e-05	0.000110941	TP53 Regulates Transcription of Genes Involved in G2 Cell Cycle Arrest	Reactome	R-HSA-6804114	PCNA; CDK1; EP300; TP53	983; 7157; 2033; 5111	18	18
5.02753e-05	0.000110941	Regulation of signaling by CBL	Reactome	R-HSA-912631	VAV1; LYN; GRB2; FYN	4067; 2534; 2885; 7409	18	18
5.24339e-05	0.000115448	Prion diseases - Homo sapiens (human)	KEGG	path:hsa05020	FYN; MAPK3; MAPK1; PRKACA; HSPA5	5594; 5595; 5566; 2534; 3309	35	35
5.42459e-05	0.000119173	Formation of TC-NER Pre-Incision Complex	Reactome	R-HSA-6781823	RPS27A; COPS5; UBA52; UBB; UBC; EP300	10987; 7316; 7311; 7314; 6233; 2033	57	57
5.45002e-05	0.000119467	Wnt signaling pathway - Homo sapiens (human)	KEGG	path:hsa04310	TP53; PRKCA; JUN; CTNNB1; PRKACA; APC; MYC; EP300; CSNK2A1	4609; 3725; 324; 7157; 1457; 5566; 5578; 1499; 2033	146	145
5.46326e-05	0.000119494	Post-translational protein modification	Reactome	R-HSA-597592	PCNA; EEF1A1; RPS27A; HSP90B1; COPS5; PRKDC; VHL; ARRB2; IKBKG; ARRB1; SPTBN1; MYC; HNRNPC; BRCA1; HSPA8; TRAF6; PARP1; HGS; SMAD2; MDM2; EP300; UBE2I; TP53; FN1; ESR1; ALB; CDK1; UBA52; UBB; UBC; APC; ACTB; RPS2	4193; 4087; 2033; 409; 7314; 6233; 8517; 672; 10987; 408; 7316; 7184; 324; 142; 4609; 2335; 213; 983; 7311; 7189; 6187; 7157; 5111; 1915; 6711; 3312; 60; 5591; 3183; 7329; 2099; 7428; 9146	1383	1378
5.99209e-05	0.000130772	NCAM signaling for neurite out-growth	Reactome	R-HSA-375165	SRC; FYN; MAPK3; GRB2; MAPK1; SPTBN1	6714; 5595; 2534; 5594; 2885; 6711	58	58
6.0315e-05	0.000131344	HSF1-dependent transactivation	Reactome	R-HSA-3371571	HSP90AB1; HSP90AA1; EP300; HSPA8; UBB	3312; 7314; 3320; 3326; 2033	36	36
6.30988e-05	0.000136211	HSP90 chaperone cycle for steroid hormone receptors (SHR)	Reactome	R-HSA-3371497	HSP90AB1; HSP90AA1; NR3C1; HSPA8	3320; 3326; 3312; 2908	19	19
6.30988e-05	0.000136211	CD209 (DC-SIGN) signaling	Reactome	R-HSA-5621575	NFKB1; EP300; PRKACA; PAK1	5566; 2033; 4790; 5058	19	19
6.30988e-05	0.000136211	Asymmetric localization of PCP proteins	Reactome	R-HSA-4608870	UBA52; RPS27A; UBB; UBC	7316; 7311; 7314; 6233	19	19
6.30988e-05	0.000136211	ER Quality Control Compartment (ERQC)	Reactome	R-HSA-901032	UBA52; RPS27A; UBB; UBC	7316; 7311; 7314; 6233	20	19
6.39286e-05	0.000137703	ESR-mediated signaling	Reactome	R-HSA-8939211	MOV10; ESR1; SP1; JUN; HSP90AB1; DDX5; HSP90AA1; MYC; EP300	3725; 6667; 2033; 3326; 4343; 2099; 1655; 4609; 3320	150	148
6.60606e-05	0.000141987	E3 ubiquitin ligases ubiquitinate target proteins	Reactome	R-HSA-8866654	PCNA; RPS27A; PRKDC; UBA52; UBB; UBC	5591; 5111; 7316; 7311; 7314; 6233	59	59
6.90798e-05	0.000147202	DNA Replication Pre-Initiation	Reactome	R-HSA-69002	CDK2; RPS27A; UBA52; UBB; UBC	1017; 7316; 7311; 7314; 6233	37	37
6.90798e-05	0.000147202	M/G1 Transition	Reactome	R-HSA-68874	CDK2; RPS27A; UBA52; UBB; UBC	1017; 7316; 7311; 7314; 6233	37	37
6.90798e-05	0.000147202	Regulation of mRNA stability by proteins that bind AU-rich elements	Reactome	R-HSA-450531	PRKCA; AKT1; HSPA8; PRKCD; PABPC1	3312; 5578; 207; 26986; 5580	37	37
6.90798e-05	0.000147202	Thyroid cancer - Homo sapiens (human)	KEGG	path:hsa05216	CTNNB1; MAPK3; MYC; MAPK1; TP53	4609; 1499; 5594; 5595; 7157	37	37
7.68018e-05	0.000163307	Sphingolipid signaling pathway - Homo sapiens (human)	KEGG	path:hsa04071	TP53; TNFRSF1A; PRKCA; FYN; MAPK3; MAPK1; AKT1; NFKB1	4790; 207; 5595; 5578; 5594; 7132; 2534; 7157	118	118
7.81513e-05	0.000165115	Assembly of the pre-replicative complex	Reactome	R-HSA-68867	UBA52; RPS27A; UBB; UBC	7311; 7314; 6233; 7316	20	20
7.81513e-05	0.000165115	Regulation of expression of SLITs and ROBOs	Reactome	R-HSA-9010553	UBA52; RPS27A; UBB; UBC	7316; 7311; 7314; 6233	20	20
7.81513e-05	0.000165115	Hedgehog ligand biogenesis	Reactome	R-HSA-5358346	UBA52; RPS27A; UBB; UBC	7316; 7314; 6233; 7311	20	20
7.87943e-05	0.000166121	Apoptotic cleavage of cellular proteins	Reactome	R-HSA-111465	CTNNB1; APC; LMNA; PRKCD; VIM	4000; 1499; 7431; 324; 5580	38	38
8.65654e-05	0.000181349	EPH-ephrin mediated repulsion of cells	Reactome	R-HSA-3928665	SRC; LYN; FYN	4067; 6714; 2534	8	8
8.65654e-05	0.000181349	cell to cell adhesion signaling	BioCarta	cell2cellpathway	SRC; PTPN11; PXN	5781; 6714; 5829	8	8
8.65654e-05	0.000181349	SHC1 events in EGFR signaling	Reactome	R-HSA-180336	GRB2; EGFR; SHC1	6464; 1956; 2885	8	8
8.95275e-05	0.00018716	Translesion synthesis by Y family DNA polymerases bypasses lesions on DNA template	Reactome	R-HSA-110313	PCNA; UBA52; RPS27A; UBB; UBC	5111; 7316; 7311; 7314; 6233	39	39
9.56563e-05	0.000198717	RHO GTPases activate PAKs	Reactome	R-HSA-5627123	MYH10; MYH9; PAK1; CDC42	4627; 4628; 998; 5058	21	21
9.56563e-05	0.000198717	nf-kb signaling pathway	BioCarta	nfkbpathway	NFKB1; IKBKG; TRAF6; TNFRSF1A	7189; 8517; 7132; 4790	21	21
9.56563e-05	0.000198717	Regulation of FZD by ubiquitination	Reactome	R-HSA-4641263	UBA52; RPS27A; UBB; UBC	7316; 7311; 7314; 6233	21	21
0.000104722	0.000217096	Semaphorin interactions	Reactome	R-HSA-373755	MYH10; MYH9; FYN; HSP90AB1; HSP90AA1; PAK1	3320; 4628; 4627; 3326; 2534; 5058	64	64
0.000105536	0.000218328	Th1 and Th2 cell differentiation - Homo sapiens (human)	KEGG	path:hsa04658	STAT1; JUN; MAPK3; MAPK1; IKBKG; NFKB1; LCK	6772; 3725; 4790; 8517; 3932; 5594; 5595	92	92
0.00011426	0.000235394	Mitophagy - animal - Homo sapiens (human)	KEGG	path:hsa04137	SRC; TP53; SP1; JUN; UBB; CSNK2A1	3725; 6667; 7314; 1457; 6714; 7157	65	65
0.00011426	0.000235394	Central carbon metabolism in cancer - Homo sapiens (human)	KEGG	path:hsa05230	TP53; MAPK3; EGFR; AKT1; MAPK1; MYC	4609; 1956; 207; 5594; 5595; 7157	65	65
0.000115844	0.000237181	NOTCH2 Activation and Transmission of Signal to the Nucleus	Reactome	R-HSA-2979096	UBA52; RPS27A; UBB; UBC	7316; 7311; 7314; 6233	22	22
0.000115844	0.000237181	Pink/Parkin Mediated Mitophagy	Reactome	R-HSA-5205685	UBA52; RPS27A; UBB; UBC	7316; 7311; 7314; 6233	22	22
0.000115844	0.000237181	Autodegradation of Cdh1 by Cdh1:APC/C	Reactome	R-HSA-174084	UBA52; RPS27A; UBB; UBC	7316; 7311; 7314; 6233	22	22
0.000119371	0.000243901	cAMP signaling pathway - Homo sapiens (human)	KEGG	path:hsa04024	MAPK3; VAV1; JUN; RAP1A; AKT1; MAPK1; PRKACA; NFKB1; EP300; PAK1	3725; 4790; 207; 7409; 5906; 5566; 5058; 5594; 5595; 2033	198	198
0.000128703	0.000262428	Signaling by the B Cell Receptor (BCR)	Reactome	R-HSA-983705	NCK1; VAV1; PLCG2; GRB2; IKBKG; NFKB1; LYN; SHC1	4067; 5336; 7409; 6464; 4790; 4690; 8517; 2885	127	127
0.000135399	0.000275515	Long-term potentiation - Homo sapiens (human)	KEGG	path:hsa04720	PRKCA; RAP1A; MAPK3; MAPK1; PRKACA; EP300	5906; 5578; 5566; 5594; 5595; 2033	67	67
0.000138056	0.000279871	p75 NTR receptor-mediated signalling	Reactome	R-HSA-193704	TRAF6; VAV1; RPS27A; UBA52; UBB; UBC; NFKB1	4790; 7311; 7314; 7189; 7316; 6233; 7409	99	96
0.000138949	0.000279871	how progesterone initiates the oocyte maturation	BioCarta	mprpathway	CDK1; MAPK1; MAPK3; SRC	983; 5594; 6714; 5595	23	23
0.000138949	0.000279871	RAF-independent MAPK1/3 activation	Reactome	R-HSA-112409	CDK1; PTPN11; MAPK1; MAPK3	983; 5781; 5595; 5594	23	23
0.000138949	0.000279871	APC/C:Cdc20 mediated degradation of Securin	Reactome	R-HSA-174154	UBA52; RPS27A; UBB; UBC	7316; 7311; 7314; 6233	23	23
0.000138949	0.000279871	Regulation of RAS by GAPs	Reactome	R-HSA-5658442	UBA52; RPS27A; UBB; UBC	7316; 7311; 7314; 6233	24	23
0.000144103	0.000289665	Hedgehog ,off, state	Reactome	R-HSA-5610787	UBA52; RPS27A; PRKACA; UBB; UBC	5566; 7316; 7311; 7314; 6233	44	43
0.000147071	0.000294439	HDR through Homologous Recombination (HRR)	Reactome	R-HSA-5685942	PCNA; BRCA1; RPS27A; UBA52; UBB; UBC	5111; 7316; 7311; 672; 7314; 6233	69	68
0.000147071	0.000294439	Gap-filling DNA repair synthesis and ligation in TC-NER	Reactome	R-HSA-6782210	PCNA; RPS27A; UBA52; UBB; UBC; EP300	5111; 7316; 7311; 7314; 6233; 2033	68	68
0.000157124	0.000313931	Processing of DNA double-strand break ends	Reactome	R-HSA-5693607	UBE2I; BRCA1; RPS27A; UBA52; CDK2; UBB; UBC	1017; 7316; 7329; 7311; 7314; 672; 6233	99	98
0.000159526	0.000318091	Dual incision in TC-NER	Reactome	R-HSA-6782135	PCNA; RPS27A; UBA52; UBB; UBC; EP300	5111; 7316; 7311; 7314; 6233; 2033	69	69
0.000165206	0.000328115	Rap1 signaling pathway - Homo sapiens (human)	KEGG	path:hsa04015	SRC; AKT1; PRKCA; EGFR; RAP1A; CTNNB1; MAPK3; MAPK1; ACTB; CDC42	6714; 60; 207; 5906; 5595; 5578; 1956; 5594; 1499; 998	206	206
0.000165214	0.000328115	Calnexin/calreticulin cycle	Reactome	R-HSA-901042	UBA52; RPS27A; UBB; UBC	7316; 7311; 7314; 6233	25	24
0.000172482	0.000341866	Cell Cycle Checkpoints	Reactome	R-HSA-69620	BRCA1; YWHAZ; TP53; RPS27A; UBA52; CDK1; CDK2; UBB; UBC; MDM2; YWHAG	983; 4193; 1017; 7316; 7157; 7532; 7311; 7314; 672; 7534; 6233	249	248
0.000173116	0.000342438	Membrane Trafficking	Reactome	R-HSA-199991	YWHAZ; SRC; RPS27A; UBC; HSPA8; EGFR; UBB; COPS5; AKT1; UBA52; GRB2; ARRB2; CLTC; ARRB1; DAB2; HGS; YWHAG; SPTBN1	207; 10987; 408; 3312; 6714; 2885; 7316; 1601; 7311; 409; 1213; 7314; 6233; 1956; 6711; 7532; 9146; 7534	582	582
0.000182299	0.000357047	EGFR Transactivation by Gastrin	Reactome	R-HSA-2179392	PRKCA; GRB2; EGFR	1956; 2885; 5578	10	10
0.000182299	0.000357047	Activation of the AP-1 family of transcription factors	Reactome	R-HSA-450341	MAPK3; MAPK1; JUN	5594; 5595; 3725	10	10
0.000182299	0.000357047	MAPK3 (ERK1) activation	Reactome	R-HSA-110056	MAPK3; PTPN11; CDK1	5781; 5595; 983	10	10
0.000182299	0.000357047	Netrin mediated repulsion signals	Reactome	R-HSA-418886	SRC; PTPN11; FYN	5781; 6714; 2534	10	10
0.000182299	0.000357047	regulation of transcriptional activity by pml	BioCarta	pmlpathway	UBE2I; TP53; RB1	7157; 7329; 5925	10	10
0.000184568	0.000360779	Tight junction - Homo sapiens (human)	KEGG	path:hsa04530	MYH10; SRC; PCNA; MYH9; JUN; RAP1A; PRKACA; ACTB; CDC42	4627; 4628; 6714; 60; 5566; 3725; 5906; 998; 5111	170	170
0.000199449	0.000389102	Switching of origins to a post-replicative state	Reactome	R-HSA-69052	UBA52; RPS27A; CDK2; UBB; UBC	7316; 7311; 1017; 7314; 6233	46	46
0.000201963	0.000393234	TCR signaling	Reactome	R-HSA-202403	NCK1; TRAF6; LCK; IKBKG; NFKB1; PAK1	3932; 7189; 4690; 8517; 4790; 5058	72	72
0.00021793	0.000423493	Leishmaniasis - Homo sapiens (human)	KEGG	path:hsa05140	TRAF6; STAT1; JUN; MAPK3; MAPK1; NFKB1	3725; 7189; 4790; 5594; 5595; 6772	74	73
0.000228215	0.00044175	TRAF6 mediated NF-kB activation	Reactome	R-HSA-933542	NFKB1; IKBKG; TRAF6; DHX9	4790; 7189; 8517; 1660	26	26
0.000228215	0.00044175	APC-Cdc20 mediated degradation of Nek2A	Reactome	R-HSA-179409	UBA52; RPS27A; UBB; UBC	7316; 7311; 7314; 6233	26	26
0.000240006	0.000463669	Signaling pathways regulating pluripotency of stem cells - Homo sapiens (human)	KEGG	path:hsa04550	MAPK3; SMAD2; CTNNB1; AKT1; GRB2; APC; MAPK1; MYC	4609; 207; 1499; 324; 2885; 5594; 5595; 4087	139	139
0.000248492	0.000478203	Depolymerisation of the Nuclear Lamina	Reactome	R-HSA-4419969	PRKCA; CDK1; LMNA	4000; 5578; 983	11	11
0.000248492	0.000478203	insulin signaling pathway	BioCarta	insulinpathway	PTPN11; GRB2; SHC1	5781; 6464; 2885	11	11
0.000252843	0.000485634	Synthesis of DNA	Reactome	R-HSA-69239	PCNA; RPS27A; UBA52; CDK2; UBB; UBC	1017; 5111; 7316; 7311; 7314; 6233	75	75
0.000265458	0.000508879	APC/C:Cdh1 mediated degradation of Cdc20 and other APC/C:Cdh1 targeted proteins in late mitosis/early G1	Reactome	R-HSA-174178	UBA52; RPS27A; UBB; UBC	7311; 7316; 7314; 6233	27	27
0.000269681	0.000515979	DNA Damage Bypass	Reactome	R-HSA-73893	PCNA; UBA52; RPS27A; UBB; UBC	5111; 7316; 7311; 7314; 6233	49	49
0.000271873	0.000519173	Cell death signalling via NRAGE, NRIF and NADE	Reactome	R-HSA-204998	TRAF6; VAV1; RPS27A; UBA52; UBB; UBC	7189; 7316; 7311; 7409; 7314; 6233	78	76
0.000287088	0.000547176	TNF signaling pathway - Homo sapiens (human)	KEGG	path:hsa04668	AKT1; TNFRSF1A; JUN; MAPK3; MAPK1; IKBKG; NFKB1	3725; 4790; 207; 8517; 5594; 5595; 7132	108	108
0.000306873	0.000583764	Ca-dependent events	Reactome	R-HSA-111996	PRKCA; MAPK1; PRKACA; PRKCD	5578; 5566; 5594; 5580	28	28
0.000325982	0.000618929	Insulin receptor signalling cascade	Reactome	R-HSA-74751	MAPK3; PTPN11; MAPK1; SHC1; GRB2	5781; 5594; 5595; 2885; 6464	51	51
0.000328458	0.000621255	carm1 and regulation of the estrogen receptor	BioCarta	carmerpathway	NR3C1; EP300; ESR1	2099; 2033; 2908	12	12
0.000328458	0.000621255	map kinase inactivation of smrt corepressor	BioCarta	smrtepathway	GRB2; EGFR; SHC1	6464; 1956; 2885	12	12
0.000352723	0.000664619	the information processing pathway at the ifn beta enhancer	BioCarta	pcafpathway	SMARCA4; NR3C1; JUN; ACTB	3725; 2908; 6597; 60	29	29
0.000352723	0.000664619	Signalling to ERKs	Reactome	R-HSA-187687	SRC; GRB2; SHC1; RAP1A	6714; 2885; 6464; 5906	29	29
0.000357262	0.000671896	mRNA Splicing - Minor Pathway	Reactome	R-HSA-72165	SNRNP200; SF3B1; YBX1; SF3B3; SF3B2	23450; 10992; 23020; 4904; 23451	52	52
0.000359526	0.000673602	DNA Replication	Reactome	R-HSA-69306	PCNA; RPS27A; UBA52; CDK2; UBB; UBC	1017; 5111; 7316; 7311; 7314; 6233	80	80
0.000359526	0.000673602	Protein ubiquitination	Reactome	R-HSA-8852135	PCNA; RPS27A; PRKDC; UBA52; UBB; UBC	5591; 5111; 7316; 7311; 7314; 6233	80	80
0.000390761	0.000730744	Signaling by PDGF	Reactome	R-HSA-186797	SRC; PTPN11; GRB2; NCK1; STAT1	6772; 6714; 4690; 2885; 5781	53	53
0.000403275	0.000747112	role of mef2d in t-cell apoptosis	BioCarta	mef2dpathway	PRKCA; EP300; FYN; LCK	3932; 5578; 2534; 2033	30	30
0.000403275	0.000747112	fmlp induced chemokine gene expression in hmc-1 cells	BioCarta	fmlppathway	PRKCA; MAPK3; MAPK1; PAK1	5578; 5595; 5594; 5058	30	30
0.000403275	0.000747112	Activation of BH3-only proteins	Reactome	R-HSA-114452	YWHAZ; AKT1; TP53; YWHAG	7157; 7532; 207; 7534	30	30
0.000403275	0.000747112	Pre-NOTCH Transcription and Translation	Reactome	R-HSA-1912408	MOV10; EP300; SNW1; TP53	7157; 22938; 4343; 2033	30	30
0.000403275	0.000747112	Budding and maturation of HIV virion	Reactome	R-HSA-162588	UBA52; RPS27A; UBB; UBC	7316; 7311; 7314; 6233	30	30
0.000423305	0.000776972	melanocyte development and pigmentation pathway	BioCarta	melanocytepathway	MAPK3; EP300; MAPK1	5594; 5595; 2033	13	13
0.000423305	0.000776972	il 6 signaling pathway	BioCarta	il6pathway	PTPN11; GRB2; SHC1	5781; 6464; 2885	13	13
0.000423305	0.000776972	multiple antiapoptotic pathways from igf-1r signaling lead to bad phosphorylation	BioCarta	igf1rpathway	MAPK3; GRB2; SHC1	6464; 5595; 2885	13	13
0.000423305	0.000776972	Signal regulatory protein family interactions	Reactome	R-HSA-391160	SRC; PTPN11; GRB2	6714; 2885; 5781	13	13
0.000423305	0.000776972	Chk1/Chk2(Cds1) mediated inactivation of Cyclin B:Cdk1 complex	Reactome	R-HSA-75035	YWHAZ; CDK1; YWHAG	7534; 7532; 983	13	13
0.000439255	0.000804761	Oxytocin signaling pathway - Homo sapiens (human)	KEGG	path:hsa04921	SRC; PRKCA; EGFR; JUN; MAPK3; MAPK1; PRKACA; ACTB	60; 3725; 6714; 1956; 5566; 5578; 5594; 5595	153	152
0.000458796	0.000837471	HSF1 activation	Reactome	R-HSA-3371511	HSP90AB1; HSP90AA1; UBB; EEF1A1	7314; 3320; 1915; 3326	31	31
0.000458796	0.000837471	Synthesis of active ubiquitin: roles of E1 and E2 enzymes	Reactome	R-HSA-8866652	UBA52; RPS27A; UBB; UBC	7316; 7311; 7314; 6233	31	31
0.000467891	0.000852506	TGF-beta signaling pathway - Homo sapiens (human)	KEGG	path:hsa04350	SP1; SMAD2; MAPK3; MAPK1; MYC; EP300	4609; 6667; 5594; 5595; 2033; 4087	84	84
0.000471906	0.000858247	Signaling by Nuclear Receptors	Reactome	R-HSA-9006931	MOV10; ESR1; SP1; JUN; HSP90AB1; DDX5; HSP90AA1; MYC; EP300	3725; 2033; 6667; 3326; 4343; 2099; 1655; 4609; 3320	195	193
0.000519557	0.000943182	TAK1 activates NFkB by phosphorylation and activation of IKKs complex	Reactome	R-HSA-445989	NFKB1; IKBKG; TRAF6; DHX9	4790; 7189; 8517; 1660	32	32
0.000534098	0.00096254	erythropoietin mediated neuroprotection through nf-kb	BioCarta	eponfkbpathway	EP300; JUN; COPS5	3725; 2033; 10987	14	14
0.000534098	0.00096254	Golgi Cisternae Pericentriolar Stack Reorganization	Reactome	R-HSA-162658	MAPK3; MAPK1; CDK1	5594; 5595; 983	14	14
0.000534098	0.00096254	il 2 signaling pathway	BioCarta	il2pathway	GRB2; SHC1; LCK	6464; 2885; 3932	14	14
0.000534098	0.00096254	Gap junction trafficking and regulation	Reactome	R-HSA-157858	SRC; CLTC; DAB2	6714; 1601; 1213	14	14
0.000544553	0.000979604	SUMO E3 ligases SUMOylate target proteins	Reactome	R-HSA-3108232	UBE2I; BRCA1; TP53; PARP1; PCNA; MDM2; HNRNPC	3183; 7157; 7329; 4193; 672; 5111; 142	120	120
0.000585832	0.00105006	ceramide signaling pathway	BioCarta	ceramidepathway	MAPK3; MAPK1; IKBKG; TNFRSF1A	7132; 5595; 8517; 5594	33	33
0.000585832	0.00105006	N-glycan trimming in the ER and Calnexin/Calreticulin cycle	Reactome	R-HSA-532668	UBA52; RPS27A; UBB; UBC	7316; 7311; 7314; 6233	34	33
0.000661859	0.00117287	il 4 signaling pathway	BioCarta	il4pathway	AKT1; GRB2; SHC1	207; 2885; 6464	15	15
0.000661859	0.00117287	WNT5A-dependent internalization of FZD4	Reactome	R-HSA-5099900	PRKCA; ARRB2; CLTC	409; 5578; 1213	15	15
0.000661859	0.00117287	il-7 signal transduction	BioCarta	il7pathway	EP300; FYN; LCK	2534; 2033; 3932	15	15
0.000661859	0.00117287	p130Cas linkage to MAPK signaling for integrins	Reactome	R-HSA-372708	SRC; FN1; RAP1A	5906; 2335; 6714	15	15
0.000661859	0.00117287	chaperones modulate interferon signaling pathway	BioCarta	tidpathway	TP53; IKBKG; RB1	7157; 5925; 8517	15	15
0.000661859	0.00117287	Activation of BAD and translocation to mitochondria	Reactome	R-HSA-111447	YWHAZ; AKT1; YWHAG	7534; 7532; 207	15	15
0.000662619	0.00117287	Oocyte meiosis - Homo sapiens (human)	KEGG	path:hsa04114	YWHAZ; MAPK3; CDK1; CDK2; MAPK1; PRKACA; YWHAG	983; 7532; 7534; 5566; 1017; 5594; 5595	124	124
0.000728817	0.00128775	SUMOylation	Reactome	R-HSA-2990846	UBE2I; BRCA1; TP53; PARP1; PCNA; MDM2; HNRNPC	3183; 7157; 7329; 4193; 672; 5111; 142	126	126
0.000736016	0.00129816	Lysosome Vesicle Biogenesis	Reactome	R-HSA-432720	HSPA8; HGS; CLTC; ARRB1	3312; 1213; 9146; 408	35	35
0.000807567	0.00141932	chromatin remodeling by hswi/snf atp-dependent complexes	BioCarta	hswisnfpathway	ACTB; SMARCA4; NR3C1	60; 6597; 2908	16	16
0.000807567	0.00141932	Rap1 signalling	Reactome	R-HSA-392517	YWHAZ; PRKACA; RAP1A	7534; 5906; 5566	16	16
0.000818354	0.00143068	Activated NTRK2 signals through FYN	Reactome	R-HSA-9032500	SRC; FYN	2534; 6714	4	4
0.000818354	0.00143068	Localization of the PINCH-ILK-PARVIN complex to focal adhesions	Reactome	R-HSA-446343	ILK; PXN	3611; 5829	4	4
0.000818354	0.00143068	Phosphorylation of proteins involved in G1/S transition by active Cyclin E:Cdk2 complexes	Reactome	R-HSA-69200	CDK2; RB1	5925; 1017	4	4
0.000820479	0.00143187	roles of arrestin dependent recruitment of src kinases in gpcr signaling	BioCarta	barrestinsrcpathway	ARRB1; SRC; MAPK1; MAPK3	6714; 5595; 5594; 408	36	36
0.000972161	0.00168474	aspirin blocks signaling pathway involved in platelet activation	BioCarta	sppapathway	PRKCA; MAPK3; MAPK1	5594; 5595; 5578	17	17
0.000972161	0.00168474	the igf-1 receptor and longevity	BioCarta	longevitypathway	AKT1; GRB2; SHC1	6464; 207; 2885	17	17
0.000972161	0.00168474	Regulation of RUNX1 Expression and Activity	Reactome	R-HSA-8934593	SRC; PTPN11; MOV10	6714; 5781; 4343	18	17
0.000972161	0.00168474	TRAF6 mediated IRF7 activation	Reactome	R-HSA-933541	EP300; TRAF6; IKBKE	7189; 2033; 9641	17	17
0.00115654	0.00199382	Protein methylation	Reactome	R-HSA-8876725	EEF1A1; HSPA8; RPS2	1915; 3312; 6187	18	18
0.00115654	0.00199382	Signalling to RAS	Reactome	R-HSA-167044	SRC; GRB2; SHC1	2885; 6464; 6714	18	18
0.00115654	0.00199382	Tie2 Signaling	Reactome	R-HSA-210993	PTPN11; GRB2; SHC1	6464; 2885; 5781	18	18
0.00122726	0.00210843	inactivation of gsk3 by akt causes accumulation of b-catenin in alveolar macrophages	BioCarta	gsk3pathway	CTNNB1; AKT1; IKBKG; CSNK2A1	207; 1499; 8517; 1457	40	40
0.00122726	0.00210843	Fanconi Anemia Pathway	Reactome	R-HSA-6783310	UBA52; RPS27A; UBB; UBC	7316; 7311; 7314; 6233	41	40
0.00123825	0.00212364	Melanogenesis - Homo sapiens (human)	KEGG	path:hsa04916	PRKCA; CTNNB1; MAPK3; MAPK1; PRKACA; EP300	5595; 5566; 5578; 5594; 1499; 2033	101	101
0.00131568	0.00224479	Adipocytokine signaling pathway - Homo sapiens (human)	KEGG	path:hsa04920	NFKB1; PTPN11; TNFRSF1A; IKBKG; AKT1	5781; 4790; 8517; 207; 7132	69	69
0.00131568	0.00224479	Loss of Nlp from mitotic centrosomes	Reactome	R-HSA-380259	HSP90AA1; TUBB; PRKACA; YWHAG; CDK1	7532; 3320; 5566; 983; 203068	69	69
0.00131568	0.00224479	Loss of proteins required for interphase microtubule organization from the centrosome	Reactome	R-HSA-380284	HSP90AA1; TUBB; PRKACA; YWHAG; CDK1	7532; 3320; 5566; 983; 203068	69	69
0.00135203	0.00229546	Estrogen-dependent gene expression	Reactome	R-HSA-9018519	MOV10; ESR1; SP1; JUN; DDX5; MYC; EP300	3725; 6667; 2033; 4343; 2099; 1655; 4609	142	140
0.00135335	0.00229546	LRR FLII-interacting protein 1 (LRRFIP1) activates type I IFN production	Reactome	R-HSA-3134973	CTNNB1; EP300	2033; 1499	5	5
0.00135335	0.00229546	MET activates PTPN11	Reactome	R-HSA-8865999	PTPN11; GRB2	5781; 2885	5	5
0.00136156	0.00229546	Ephrin signaling	Reactome	R-HSA-3928664	SRC; FYN; PAK1	2534; 6714; 5058	19	19
0.00136156	0.00229546	RHO GTPases Activate ROCKs	Reactome	R-HSA-5627117	MYH10; MYH9; PAK1	4628; 4627; 5058	19	19
0.00136156	0.00229546	role of mal in rho-mediated activation of srf	BioCarta	malpathway	MAPK3; MAPK1; CDC42	5595; 5594; 998	19	19
0.00136156	0.00229546	VEGFR2 mediated cell proliferation	Reactome	R-HSA-5218921	PRKCA; SRC; PRKCD	6714; 5580; 5578	19	19
0.00140359	0.00236232	RIG-I-like receptor signaling pathway - Homo sapiens (human)	KEGG	path:hsa04622	NFKB1; DDX3X; IKBKG; TRAF6; IKBKE	7189; 9641; 4790; 1654; 8517	70	70
0.0014759	0.00247981	Pre-NOTCH Expression and Processing	Reactome	R-HSA-1912422	MOV10; EP300; SNW1; TP53	7157; 22938; 4343; 2033	42	42
0.00158804	0.00264142	ras signaling pathway	BioCarta	raspathway	VAV1; AKT1; CDC42	207; 998; 7409	20	20
0.00158804	0.00264142	the co-stimulatory signal during t-cell activation	BioCarta	ctla4pathway	PTPN11; GRB2; LCK	2885; 3932; 5781	20	20
0.00158804	0.00264142	fas signaling pathway (cd95)	BioCarta	faspathway	PAK1; RB1; PRKDC	5058; 5925; 5591	20	20
0.00158804	0.00264142	tgf beta signaling pathway	BioCarta	tgfbpathway	MAPK3; EP300; SMAD2	5595; 2033; 4087	20	20
0.00158804	0.00264142	NOTCH3 Intracellular Domain Regulates Transcription	Reactome	R-HSA-9013508	EP300; SNW1; STAT1	6772; 22938; 2033	20	20
0.00158804	0.00264142	SUMOylation of transcription factors	Reactome	R-HSA-3232118	UBE2I; MDM2; TP53	7157; 7329; 4193	20	20
0.00159231	0.00264409	AURKA Activation by TPX2	Reactome	R-HSA-8854518	HSP90AA1; TUBB; PRKACA; YWHAG; CDK1	7532; 5566; 3320; 983; 203068	72	72
0.00161249	0.00267313	Intrinsic Pathway for Apoptosis	Reactome	R-HSA-109606	YWHAZ; AKT1; TP53; YWHAG	7157; 7532; 207; 7534	43	43
0.00175764	0.00290889	PLC beta mediated events	Reactome	R-HSA-112043	PRKCA; MAPK1; PRKACA; PRKCD	5578; 5566; 5594; 5580	44	44
0.00179906	0.00297249	Thyroid hormone synthesis - Homo sapiens (human)	KEGG	path:hsa04918	PRKCA; ALB; PRKACA; HSP90B1; HSPA5	3309; 7184; 5566; 5578; 213	74	74
0.00180435	0.00297628	Neutrophil degranulation	Reactome	R-HSA-6798695	EEF1A1; KPNB1; DDX3X; HLA-B; HSPA8; VCL; PRKCD; RAP1A; TUBB; HSP90AB1; MAPK1; NFKB1; HSP90AA1; XRCC6	3312; 3106; 3326; 5906; 3320; 5580; 4790; 1915; 2547; 5594; 3837; 7414; 1654; 203068	490	485
0.0019095	0.00314276	Signaling by Insulin receptor	Reactome	R-HSA-74752	MAPK3; PTPN11; MAPK1; SHC1; GRB2	5781; 5594; 5595; 6464; 2885	75	75
0.00191161	0.00314276	G-protein mediated events	Reactome	R-HSA-112040	PRKCA; MAPK1; PRKACA; PRKCD	5578; 5566; 5594; 5580	45	45
0.00201429	0.00330064	AUF1 (hnRNP D0) binds and destabilizes mRNA	Reactome	R-HSA-450408	PABPC1; HSPA8	3312; 26986	6	6
0.00201429	0.00330064	Negative feedback regulation of MAPK pathway	Reactome	R-HSA-5674499	MAPK3; MAPK1	5594; 5595	6	6
0.00202483	0.00331245	Pertussis - Homo sapiens (human)	KEGG	path:hsa05133	MAPK3; MAPK1; JUN; TRAF6; NFKB1	3725; 7189; 5595; 4790; 5594	76	76
0.00210285	0.00343236	Cholinergic synapse - Homo sapiens (human)	KEGG	path:hsa04725	MAPK3; PRKCA; FYN; AKT1; MAPK1; PRKACA	207; 5566; 5578; 5594; 5595; 2534	112	112
0.0021085	0.00343236	CD28 dependent PI3K/Akt signaling	Reactome	R-HSA-389357	AKT1; FYN; LCK	207; 3932; 2534	22	22
0.0021085	0.00343236	ras-independent pathway in nk cell-mediated cytotoxicity	BioCarta	nkcellspathway	VAV1; MAPK3; PAK1	5595; 7409; 5058	22	22
0.00214517	0.00348633	Antigen processing and presentation - Homo sapiens (human)	KEGG	path:hsa04612	HSP90AB1; HLA-B; HSPA8; HSPA5; HSP90AA1	3309; 3106; 3312; 3320; 3326	77	77
0.00224681	0.00364008	Hippo signaling pathway - Homo sapiens (human)	KEGG	path:hsa04390	YWHAZ; SMAD2; YWHAG; CTNNB1; APC; MYC; ACTB	4609; 60; 324; 7532; 7534; 1499; 4087	154	153
0.0022471	0.00364008	Endocrine and other factor-regulated calcium reabsorption - Homo sapiens (human)	KEGG	path:hsa04961	PRKCA; PRKACA; CLTC; ESR1	2099; 1213; 5566; 5578	47	47
0.00240137	0.00385016	Recruitment of NuMA to mitotic centrosomes	Reactome	R-HSA-380320	HSP90AA1; TUBB; PRKACA; YWHAG; CDK1	3320; 5566; 983; 7532; 203068	79	79
0.00240393	0.00385016	cyclins and cell cycle regulation	BioCarta	cellcyclepathway	CDK1; CDK2; RB1	1017; 5925; 983	23	23
0.00240393	0.00385016	Nephrin family interactions	Reactome	R-HSA-373753	FYN; NCK1; SPTBN1	2534; 4690; 6711	23	23
0.00240393	0.00385016	tnf/stress related signaling	BioCarta	stresspathway	JUN; IKBKG; TNFRSF1A	3725; 7132; 8517	23	23
0.00240393	0.00385016	RIP-mediated NFkB activation via ZBP1	Reactome	R-HSA-1810476	NFKB1; IKBKG; DHX9	4790; 8517; 1660	23	23
0.00240393	0.00385016	growth hormone signaling pathway	BioCarta	ghpathway	PRKCA; GRB2; SHC1	5578; 2885; 6464	23	23
0.00240393	0.00385016	ccr3 signaling in eosinophils	BioCarta	ccr3pathway	PRKCA; MAPK3; MAPK1	5578; 5594; 5595	23	23
0.00253749	0.00405101	Recruitment of mitotic centrosome proteins and complexes	Reactome	R-HSA-380270	HSP90AA1; TUBB; PRKACA; YWHAG; CDK1	7532; 3320; 5566; 983; 203068	80	80
0.00253749	0.00405101	Centrosome maturation	Reactome	R-HSA-380287	HSP90AA1; TUBB; PRKACA; YWHAG; CDK1	7532; 3320; 5566; 983; 203068	80	80
0.00267913	0.00427027	Regulation of HSF1-mediated heat shock response	Reactome	R-HSA-3371453	HSPA8; MAPK3; MAPK1; HSPA5; UBB	5595; 7314; 5594; 3309; 3312	81	81
0.00279817	0.00443156	tsp-1 induced apoptosis in microvascular endothelial cell	BioCarta	tsp1pathway	JUN; FYN	2534; 3725	7	7
0.00279817	0.00443156	GRB2 events in EGFR signaling	Reactome	R-HSA-179812	GRB2; EGFR	2885; 1956	7	7
0.00279817	0.00443156	TFAP2A acts as a transcriptional repressor during retinoic acid induced cell differentiation	Reactome	R-HSA-8869496	HSPD1; NPM1	3329; 4869	7	7
0.00279817	0.00443156	overview of telomerase rna component gene hterc transcriptional regulation	BioCarta	tercpathway	SP1; RB1	5925; 6667	7	7
0.00282322	0.0044641	Vibrio cholerae infection - Homo sapiens (human)	KEGG	path:hsa05110	PRKCA; PLCG2; ACTB; PRKACA	60; 5566; 5578; 5336	50	50
0.00285186	0.00450223	G2/M Checkpoints	Reactome	R-HSA-69481	YWHAZ; BRCA1; TP53; CDK1; CDK2; YWHAG	1017; 983; 7157; 7532; 7534; 672	120	119
0.00303575	0.00478492	Downstream TCR signaling	Reactome	R-HSA-202424	NFKB1; LCK; TRAF6; IKBKG	3932; 4790; 8517; 7189	51	51
0.00306859	0.00482138	G0 and Early G1	Reactome	R-HSA-1538133	PCNA; CDK1; CDK2	983; 5111; 1017	25	25
0.00306859	0.00482138	Downstream signaling of activated FGFR3	Reactome	R-HSA-5654708	PTPN11; GRB2; SHC1	5781; 2885; 6464	25	25
0.00309509	0.00485533	Jak-STAT signaling pathway - Homo sapiens (human)	KEGG	path:hsa04630	STAT1; PTPN11; EGFR; AKT1; GRB2; MYC; EP300	4609; 6772; 5781; 207; 2033; 2885; 1956	162	162
0.00343907	0.00537795	Calmodulin induced events	Reactome	R-HSA-111933	PRKCA; PRKACA; PRKCD	5578; 5566; 5580	26	26
0.00343907	0.00537795	CaM pathway	Reactome	R-HSA-111997	PRKCA; PRKACA; PRKCD	5578; 5566; 5580	26	26
0.00347458	0.00541641	RUNX1 regulates transcription of genes involved in differentiation of HSCs	Reactome	R-HSA-8939236	ABL1; UBA52; RPS27A; UBB; UBC	25; 7311; 7314; 7316; 6233	88	86
0.00347458	0.00541641	TP53 Regulates Metabolic Genes	Reactome	R-HSA-5628897	YWHAZ; AKT1; TP53; YWHAG; MOV10	207; 7157; 7532; 4343; 7534	86	86
0.00370204	0.00570827	Nef and signal transduction	Reactome	R-HSA-164944	FYN; LCK	3932; 2534	8	8
0.00370204	0.00570827	RUNX3 regulates WNT signaling	Reactome	R-HSA-8951430	CTNNB1; MYC	4609; 1499	8	8
0.00370204	0.00570827	Binding of TCF/LEF:CTNNB1 to target gene promoters	Reactome	R-HSA-4411364	CTNNB1; MYC	4609; 1499	8	8
0.00370204	0.00570827	HDL assembly	Reactome	R-HSA-8963896	PRKACA; A2M	5566; 2	8	8
0.00370204	0.00570827	HuR (ELAVL1) binds and stabilizes mRNA	Reactome	R-HSA-450520	PRKCA; PRKCD	5580; 5578	8	8
0.00370204	0.00570827	stat3 signaling pathway	BioCarta	stat3pathway	MAPK3; MAPK1	5594; 5595	8	8
0.00370204	0.00570827	Interleukin-15 signaling	Reactome	R-HSA-8983432	GRB2; SHC1	6464; 2885	8	8
0.00383578	0.00586892	corticosteroids and cardioprotection	BioCarta	gcrpathway	AKT1; NR3C1; HSP90AA1	207; 2908; 3320	27	27
0.00383578	0.00586892	FGFR2 alternative splicing	Reactome	R-HSA-6803529	HNRNPA1; HNRNPH1; HNRNPM	4670; 3187; 3178	27	27
0.00383578	0.00586892	Downstream signaling of activated FGFR4	Reactome	R-HSA-5654716	PTPN11; GRB2; SHC1	5781; 2885; 6464	27	27
0.00383578	0.00586892	MET promotes cell motility	Reactome	R-HSA-8875878	SRC; GRB2; RAP1A	6714; 2885; 5906	27	27
0.00383578	0.00586892	ZBP1(DAI) mediated induction of type I IFNs	Reactome	R-HSA-1606322	NFKB1; IKBKG; DHX9	8517; 4790; 1660	27	27
0.00399517	0.00610339	Legionellosis - Homo sapiens (human)	KEGG	path:hsa05134	EEF1A1; HSPD1; HSPA8; NFKB1	3329; 4790; 3312; 1915	55	55
0.00408891	0.006237	Autophagy - animal - Homo sapiens (human)	KEGG	path:hsa04140	TRAF6; MAPK3; PRKCD; AKT1; MAPK1; PRKACA	7189; 207; 5566; 5580; 5594; 5595	128	128
0.00425925	0.00646702	multi-step regulation of transcription by pitx2	BioCarta	pitx2pathway	CTNNB1; EP300; CSNK2A1	1499; 1457; 2033	28	28
0.00425925	0.00646702	Recycling pathway of L1	Reactome	R-HSA-437239	SRC; MAPK1; CLTC	6714; 5594; 1213	29	28
0.00425925	0.00646702	DNA Damage/Telomere Stress Induced Senescence	Reactome	R-HSA-2559586	CDK2; TP53; RB1	7157; 1017; 5925	28	28
0.00434475	0.00658678	Cell surface interactions at the vascular wall	Reactome	R-HSA-202733	SRC; SHC1; FN1; PTPN11; FYN; GRB2; LYN; LCK	4067; 2534; 6464; 6714; 2335; 3932; 5781; 2885	219	218
0.00471	0.00702085	CDO in myogenesis	Reactome	R-HSA-375170	CTNNB1; ABL1; CDC42	1499; 998; 25	29	29
0.00471	0.00702085	Myogenesis	Reactome	R-HSA-525793	CTNNB1; ABL1; CDC42	1499; 998; 25	29	29
0.00471	0.00702085	nfkb activation by nontypeable hemophilus influenzae	BioCarta	nthipathway	NR3C1; EP300; IKBKG	2908; 8517; 2033	29	29
0.00471	0.00702085	Dectin-2 family	Reactome	R-HSA-5621480	PLCG2; LYN; FYN	4067; 5336; 2534	29	29
0.00472299	0.00702085	Formation of annular gap junctions	Reactome	R-HSA-196025	DAB2; CLTC	1601; 1213	9	9
0.00472299	0.00702085	ROBO receptors bind AKAP5	Reactome	R-HSA-9010642	PRKCA; PRKACA	5566; 5578	9	9
0.00472299	0.00702085	MAPK1 (ERK2) activation	Reactome	R-HSA-112411	PTPN11; MAPK1	5781; 5594	9	9
0.00472299	0.00702085	MET activates RAP1 and RAC1	Reactome	R-HSA-8875555	GRB2; RAP1A	5906; 2885	9	9
0.00472299	0.00702085	cyclin e destruction pathway	BioCarta	fbw7pathway	CDK2; RB1	5925; 1017	9	9
0.00472299	0.00702085	Activated NTRK2 signals through RAS	Reactome	R-HSA-9026519	GRB2; SHC1	6464; 2885	9	9
0.00472299	0.00702085	SHC-related events triggered by IGF1R	Reactome	R-HSA-2428933	GRB2; SHC1	6464; 2885	9	9
0.00472299	0.00702085	PI5P Regulates TP53 Acetylation	Reactome	R-HSA-6811555	EP300; TP53	7157; 2033	9	9
0.00472299	0.00702085	btg family proteins and cell cycle regulation	BioCarta	btg2pathway	TP53; RB1	7157; 5925	9	9
0.00483645	0.00715737	Viral myocarditis - Homo sapiens (human)	KEGG	path:hsa05416	ABL1; HLA-B; ACTB; FYN	25; 3106; 60; 2534	59	58
0.00483645	0.00715737	Iron uptake and transport	Reactome	R-HSA-917937	UBA52; RPS27A; UBB; UBC	7316; 7311; 7314; 6233	58	58
0.00483645	0.00715737	ABC-family proteins mediated transport	Reactome	R-HSA-382556	UBA52; RPS27A; UBB; UBC	7316; 7311; 7314; 6233	59	58
0.00510953	0.00755024	Response to elevated platelet cytosolic Ca2+	Reactome	R-HSA-76005	FN1; HSPA5; PRKCA; VCL; ALB; A2M	5578; 3309; 7414; 2; 2335; 213	134	134
0.00518852	0.0076216	Downstream signaling of activated FGFR2	Reactome	R-HSA-5654696	PTPN11; GRB2; SHC1	5781; 2885; 6464	30	30
0.00518852	0.0076216	ISG15 antiviral mechanism	Reactome	R-HSA-1169408	MAPK3; EIF4A3; STAT1	6772; 5595; 9775	30	30
0.00518852	0.0076216	Antiviral mechanism by IFN-stimulated genes	Reactome	R-HSA-1169410	MAPK3; EIF4A3; STAT1	6772; 5595; 9775	30	30
0.00518852	0.0076216	Regulation of TP53 Activity through Acetylation	Reactome	R-HSA-6804758	AKT1; EP300; TP53	7157; 207; 2033	30	30
0.00531298	0.00776994	G2/M DNA damage checkpoint	Reactome	R-HSA-69473	YWHAZ; CDK1; TP53; YWHAG; BRCA1	983; 7157; 7532; 7534; 672	96	95
0.00531298	0.00776994	RHO GTPases activate PKNs	Reactome	R-HSA-5625740	MYH10; YWHAZ; MYH9; YWHAG; PAK1	4628; 7532; 5058; 4627; 7534	96	95
0.00531298	0.00776994	Amoebiasis - Homo sapiens (human)	KEGG	path:hsa05146	PRKCA; NFKB1; VCL; FN1; PRKACA	4790; 7414; 2335; 5566; 5578	96	95
0.00545887	0.00797156	Long-term depression - Homo sapiens (human)	KEGG	path:hsa04730	PRKCA; MAPK3; LYN; MAPK1	5578; 5594; 5595; 4067	60	60
0.00568475	0.00825608	Insulin signaling pathway - Homo sapiens (human)	KEGG	path:hsa04910	SHC1; MAPK3; AKT1; GRB2; PRKACA; MAPK1	207; 6464; 2885; 5594; 5566; 5595	137	137
0.00569528	0.00825608	wnt signaling pathway	BioCarta	wntpathway	CTNNB1; MYC; CSNK2A1	1499; 1457; 4609	31	31
0.00569528	0.00825608	MAPK targets/ Nuclear events mediated by MAP kinases	Reactome	R-HSA-450282	MAPK3; MAPK1; JUN	3725; 5595; 5594	31	31
0.00569528	0.00825608	Downstream signaling of activated FGFR1	Reactome	R-HSA-5654687	PTPN11; GRB2; SHC1	5781; 2885; 6464	31	31
0.00569528	0.00825608	p38 mapk signaling pathway	BioCarta	p38mapkpathway	MYC; STAT1; CDC42	6772; 998; 4609	31	31
0.00579992	0.0083711	Anchoring of the basal body to the plasma membrane	Reactome	R-HSA-5620912	CDK1; TUBB; PRKACA; YWHAG; HSP90AA1	983; 5566; 7532; 3320; 203068	97	97
0.00579992	0.0083711	Antigen activates B Cell Receptor (BCR) leading to generation of second messengers	Reactome	R-HSA-983695	VAV1; PLCG2; GRB2; SHC1; NCK1	5336; 6464; 4690; 2885; 7409	97	97
0.00579992	0.0083711	Inflammatory mediator regulation of TRP channels - Homo sapiens (human)	KEGG	path:hsa04750	PRKCA; SRC; PRKACA; PRKCD; PLCG2	6714; 5336; 5566; 5578; 5580	97	97
0.00585816	0.00839417	Tetrahydrobiopterin (BH4) synthesis, recycling, salvage and regulation	Reactome	R-HSA-1474151	AKT1; HSP90AA1	207; 3320	10	10
0.00585816	0.00839417	Activation of SMO	Reactome	R-HSA-5635838	ARRB2; ARRB1	408; 409	10	10
0.00585816	0.00839417	Gap junction degradation	Reactome	R-HSA-190873	DAB2; CLTC	1601; 1213	10	10
0.00585816	0.00839417	e2f1 destruction pathway	BioCarta	skp2e2fpathway	CDK2; RB1	5925; 1017	10	10
0.00585816	0.00839417	GP1b-IX-V activation signalling	Reactome	R-HSA-430116	YWHAZ; SRC	7534; 6714	10	10
0.00613269	0.00877487	Regulation of PTEN gene transcription	Reactome	R-HSA-8943724	JUN; MAPK1; TP53; MAPK3	7157; 3725; 5594; 5595	62	62
0.0062307	0.00888949	DAG and IP3 signaling	Reactome	R-HSA-1489509	PRKCA; PRKACA; PRKCD	5578; 5566; 5580	32	32
0.0062307	0.00888949	role of -arrestins in the activation and targeting of map kinases	BioCarta	barrmapkpathway	MAPK3; MAPK1; ARRB1	5595; 5594; 408	32	32
0.00674669	0.00961185	Mitotic Prophase	Reactome	R-HSA-68875	MAPK3; PRKCA; RB1; CDK1; MAPK1; LMNA	5925; 5578; 983; 4000; 5595; 5594	143	142
0.00685968	0.00975882	Peroxisomal protein import	Reactome	R-HSA-9033241	UBA52; RPS27A; UBB; UBC	7316; 7311; 7314; 6233	64	64
0.00710476	0.0100213	eNOS activation	Reactome	R-HSA-203615	AKT1; HSP90AA1	207; 3320	11	11
0.00710476	0.0100213	RHO GTPases activate IQGAPs	Reactome	R-HSA-5626467	CTNNB1; CDC42	1499; 998	11	11
0.00710476	0.0100213	MET activates RAS signaling	Reactome	R-HSA-8851805	GRB2; SHC1	6464; 2885	11	11
0.00710476	0.0100213	epo signaling pathway	BioCarta	epopathway	GRB2; SHC1	6464; 2885	11	11
0.00710476	0.0100213	Interleukin-6 signaling	Reactome	R-HSA-1059683	PTPN11; STAT1	6772; 5781	11	11
0.00710476	0.0100213	Regulated proteolysis of p75NTR	Reactome	R-HSA-193692	NFKB1; TRAF6	7189; 4790	11	11
0.00715357	0.0100759	UCH proteinases	Reactome	R-HSA-5689603	UBA52; RPS27A; ACTB; UBB; UBC	7316; 7314; 6233; 7311; 60	102	102
0.00724365	0.0101883	Inflammatory bowel disease (IBD) - Homo sapiens (human)	KEGG	path:hsa05321	NFKB1; JUN; STAT1; SMAD2	3725; 4790; 4087; 6772	65	65
0.00801284	0.0112384	toll-like receptor pathway	BioCarta	tollpathway	JUN; IKBKG; TRAF6	3725; 7189; 8517	35	35
0.00801284	0.0112384	Smooth Muscle Contraction	Reactome	R-HSA-445355	VCL; PXN; PAK1	5829; 7414; 5058	35	35
0.00805357	0.0112795	TP53 Regulates Transcription of DNA Repair Genes	Reactome	R-HSA-6796648	BRCA1; JUN; SSRP1; TP53	7157; 672; 3725; 6749	70	67
0.00846002	0.011733	Condensation of Prometaphase Chromosomes	Reactome	R-HSA-2514853	CDK1; CSNK2A1	983; 1457	12	12
0.00846002	0.011733	Gap junction trafficking	Reactome	R-HSA-190828	DAB2; CLTC	1601; 1213	12	12
0.00846002	0.011733	il 3 signaling pathway	BioCarta	il3pathway	GRB2; SHC1	6464; 2885	12	12
0.00846002	0.011733	Interleukin-2 signaling	Reactome	R-HSA-9020558	SHC1; LCK	6464; 3932	12	12
0.00846002	0.011733	Receptor Mediated Mitophagy	Reactome	R-HSA-8934903	SRC; CSNK2A1	6714; 1457	12	12
0.00846002	0.011733	IRAK1 recruits IKK complex upon TLR7/8 or 9 stimulation	Reactome	R-HSA-975144	IKBKG; TRAF6	7189; 8517	12	12
0.00846002	0.011733	IRAK1 recruits IKK complex	Reactome	R-HSA-937039	IKBKG; TRAF6	7189; 8517	12	12
0.00847992	0.0117442	p53 signaling pathway - Homo sapiens (human)	KEGG	path:hsa04115	CDK1; MDM2; TP53; CDK2	983; 4193; 7157; 1017	68	68
0.00871391	0.0120514	Insulin resistance - Homo sapiens (human)	KEGG	path:hsa04931	NFKB1; PTPN11; TNFRSF1A; PRKCD; AKT1	5781; 4790; 207; 5580; 7132	107	107
0.0087351	0.0120639	mTOR signaling pathway - Homo sapiens (human)	KEGG	path:hsa04150	TNFRSF1A; PRKCA; AKT1; GRB2; MAPK1; MAPK3	207; 2885; 5578; 5594; 5595; 7132	151	150
0.0089208	0.0123033	Plasma lipoprotein assembly, remodeling, and clearance	Reactome	R-HSA-174824	ALB; PRKACA; A2M; CLTC	5566; 2; 1213; 213	69	69
0.00905206	0.012467	FCERI mediated Ca+2 mobilization	Reactome	R-HSA-2871809	VAV1; PLCG2; LYN; GRB2; SHC1	4067; 5336; 6464; 2885; 7409	108	108
0.00935097	0.012843	signal transduction through il1r	BioCarta	il1rpathway	JUN; IKBKG; TRAF6	3725; 7189; 8517	37	37
0.00935097	0.012843	Aldosterone-regulated sodium reabsorption - Homo sapiens (human)	KEGG	path:hsa04960	PRKCA; MAPK3; MAPK1	5595; 5578; 5594	37	37
0.00937639	0.0128602	Regulation of insulin secretion	Reactome	R-HSA-422356	PRKCA; PRKACA; RAP1A; SLC25A5	5578; 292; 5566; 5906	70	70
0.00987295	0.0133674	HIV Life Cycle	Reactome	R-HSA-162587	SSRP1; RPS27A; UBA52; UBB; UBC; XRCC6	2547; 7311; 7314; 6749; 7316; 6233	156	154
0.00992124	0.0133674	attenuation of gpcr signaling	BioCarta	agpcrpathway	PRKCA; ARRB1	408; 5578	13	13
0.00992124	0.0133674	regulation of p27 phosphorylation during cell cycle progression	BioCarta	p27pathway	CDK2; RB1	1017; 5925	13	13
0.00992124	0.0133674	DEx/H-box helicases activate type I IFN and inflammatory cytokines production	Reactome	R-HSA-3134963	DHX9; NFKB1	1660; 4790	13	13
0.00992124	0.0133674	TRAF3-dependent IRF activation pathway	Reactome	R-HSA-918233	EP300; IKBKE	2033; 9641	13	13
0.00992124	0.0133674	lck and fyn tyrosine kinases in initiation of tcr activation	BioCarta	tcrapathway	FYN; LCK	2534; 3932	13	13
0.00992124	0.0133674	Non-homologous end-joining - Homo sapiens (human)	KEGG	path:hsa03450	PRKDC; XRCC6	2547; 5591	13	13
0.00992124	0.0133674	IRF3-mediated induction of type I IFN	Reactome	R-HSA-3270619	PRKDC; XRCC6	2547; 5591	13	13
0.00992124	0.0133674	Platelet Adhesion to exposed collagen	Reactome	R-HSA-75892	LYN; FYN	4067; 2534	13	13
0.00992124	0.0133674	effects of calcineurin in keratinocyte differentiation	BioCarta	calcineurinpathway	PRKCA; SP1	5578; 6667	13	13
0.00992124	0.0133674	ERKs are inactivated	Reactome	R-HSA-202670	MAPK3; MAPK1	5594; 5595	13	13
0.00992124	0.0133674	Advanced glycosylation endproduct receptor signaling	Reactome	R-HSA-879415	MAPK3; MAPK1	5594; 5595	13	13
0.00992124	0.0133674	Activation of IRF3/IRF7 mediated by TBK1/IKK epsilon	Reactome	R-HSA-936964	PTPN11; IKBKE	5781; 9641	13	13
0.010066	0.013544	Interleukin-2 family signaling	Reactome	R-HSA-451927	GRB2; LCK; SHC1	3932; 2885; 6464	38	38
0.0103324	0.013865	Clathrin derived vesicle budding	Reactome	R-HSA-421837	HSPA8; HGS; CLTC; ARRB1	3312; 9146; 408; 1213	72	72
0.0103324	0.013865	trans-Golgi Network Vesicle Budding	Reactome	R-HSA-199992	HSPA8; HGS; CLTC; ARRB1	3312; 9146; 408; 1213	72	72
0.0108119	0.0144888	RUNX1 interacts with co-factors whose precise effect on RUNX1 targets is not known	Reactome	R-HSA-8939243	EP300; SMARCA4; CSNK2A1	6597; 1457; 2033	40	39
0.0111128	0.014872	Interferon Signaling	Reactome	R-HSA-913531	STAT1; HLA-B; PTPN11; PRKCD; MAPK3; EIF4A3	3106; 5580; 6772; 5781; 9775; 5595	158	158
0.0114858	0.0151869	AKT phosphorylates targets in the cytosol	Reactome	R-HSA-198323	AKT1; MDM2	207; 4193	14	14
0.0114858	0.0151869	akap95 role in mitosis and chromosome dynamics	BioCarta	akap95pathway	DDX5; CDK1	1655; 983	14	14
0.0114858	0.0151869	Activation of RAC1	Reactome	R-HSA-428540	PAK1; NCK1	5058; 4690	14	14
0.0114858	0.0151869	SHC1 events in ERBB4 signaling	Reactome	R-HSA-1250347	GRB2; SHC1	6464; 2885	14	14
0.0114858	0.0151869	Regulation of IFNG signaling	Reactome	R-HSA-877312	PTPN11; STAT1	6772; 5781	14	14
0.0114858	0.0151869	apoptotic signaling in response to dna damage	BioCarta	chemicalpathway	AKT1; TP53	7157; 207	14	14
0.0114858	0.0151869	Regulation of TP53 Activity through Association with Co-factors	Reactome	R-HSA-6804759	AKT1; TP53	7157; 207	14	14
0.0114858	0.0151869	TP53 Regulates Transcription of Genes Involved in G1 Cell Cycle Arrest	Reactome	R-HSA-6804116	CDK2; TP53	7157; 1017	14	14
0.0114858	0.0151869	RUNX3 regulates NOTCH signaling	Reactome	R-HSA-8941856	EP300; SNW1	22938; 2033	14	14
0.0123976	0.016349	Binding and Uptake of Ligands by Scavenger Receptors	Reactome	R-HSA-2173782	HSP90AA1; ALB; HSP90B1	3320; 213; 7184	41	41
0.0123976	0.016349	Generation of second messenger molecules	Reactome	R-HSA-202433	PAK1; LCK; NCK1	3932; 4690; 5058	41	41
0.013151	0.0172737	TFAP2 (AP-2) family regulates transcription of growth factors and their receptors	Reactome	R-HSA-8866910	EGFR; ESR1	1956; 2099	15	15
0.013151	0.0172737	repression of pain sensation by the transcriptional regulator dream	BioCarta	dreampathway	MAPK3; JUN	5595; 3725	15	15
0.013151	0.0172737	double stranded rna induced gene expression	BioCarta	rnapathway	TP53; IKBKG	7157; 8517	15	15
0.0131736	0.0172806	Necroptosis - Homo sapiens (human)	KEGG	path:hsa04217	STAT1; TNFRSF1A; PARP1; SLC25A5; HSP90AB1; HSP90AA1	3320; 6772; 142; 3326; 292; 7132	164	164
0.0143029	0.0187372	Vascular smooth muscle contraction - Homo sapiens (human)	KEGG	path:hsa04270	PRKCA; MAPK3; MAPK1; PRKACA; PRKCD	5566; 5578; 5580; 5594; 5595	121	121
0.0149143	0.0193594	eNOS activation and regulation	Reactome	R-HSA-203765	AKT1; HSP90AA1	207; 3320	16	16
0.0149143	0.0193594	Metabolism of nitric oxide	Reactome	R-HSA-202131	AKT1; HSP90AA1	207; 3320	16	16
0.0149143	0.0193594	PI3K events in ERBB2 signaling	Reactome	R-HSA-1963642	GRB2; EGFR	1956; 2885	16	16
0.0149143	0.0193594	STING mediated induction of host immune responses	Reactome	R-HSA-1834941	PRKDC; XRCC6	2547; 5591	16	16
0.0149143	0.0193594	GRB2 events in ERBB2 signaling	Reactome	R-HSA-1963640	GRB2; EGFR	2885; 1956	16	16
0.0149143	0.0193594	Cell-extracellular matrix interactions	Reactome	R-HSA-446353	ILK; PXN	3611; 5829	16	16
0.0149143	0.0193594	bone remodeling	BioCarta	ranklpathway	IKBKG; TRAF6	7189; 8517	16	16
0.0150134	0.0194625	nfat and hypertrophy of the heart	BioCarta	nfatpathway	AKT1; GRB2; SHC1	207; 2885; 6464	44	44
0.0154084	0.0199226	Opioid Signalling	Reactome	R-HSA-111885	PRKCA; MAPK1; PRKACA; PRKCD	5578; 5594; 5566; 5580	82	81
0.0154084	0.0199226	Amyloid fiber formation	Reactome	R-HSA-977225	UBA52; RPS27A; UBB; UBC	7316; 7311; 7314; 6233	82	81
0.0167733	0.0214361	y branching of actin filaments	BioCarta	actinypathway	NCK1; CDC42	998; 4690	17	17
0.0167733	0.0214361	role of pi3k subunit p85 in regulation of actin organization and cell migration	BioCarta	cdc42racpathway	PAK1; CDC42	998; 5058	17	17
0.0167733	0.0214361	Beta-catenin phosphorylation cascade	Reactome	R-HSA-196299	CTNNB1; APC	1499; 324	17	17
0.0167733	0.0214361	tnfr1 signaling pathway	BioCarta	tnfr1pathway	LMNA; TNFRSF1A	4000; 7132	17	17
0.0167733	0.0214361	Activation of E2F1 target genes at G1/S	Reactome	R-HSA-539107	PCNA; CDK1	5111; 983	17	17
0.0167733	0.0214361	G1/S-Specific Transcription	Reactome	R-HSA-69205	PCNA; CDK1	5111; 983	17	17
0.0167733	0.0214361	role of nicotinic acetylcholine receptors in the regulation of apoptosis	BioCarta	achpathway	SRC; AKT1	6714; 207	17	17
0.0167733	0.0214361	ucalpain and friends in cell spread	BioCarta	ucalpainpathway	SRC; PXN	6714; 5829	17	17
0.0167733	0.0214361	Formation of Senescence-Associated Heterochromatin Foci (SAHF)	Reactome	R-HSA-2559584	TP53; RB1	7157; 5925	17	17
0.0169172	0.0215646	Hedgehog signaling pathway - Homo sapiens (human)	KEGG	path:hsa04340	PRKACA; ARRB2; ARRB1	408; 409; 5566	47	46
0.0169172	0.0215646	Type II diabetes mellitus - Homo sapiens (human)	KEGG	path:hsa04930	MAPK3; MAPK1; PRKCD	5580; 5594; 5595	46	46
0.0179174	0.0228103	Nucleotide-binding domain, leucine rich repeat containing receptor (NLR) signaling pathways	Reactome	R-HSA-168643	HSP90AB1; IKBKG; TRAF6	7189; 8517; 3326	47	47
0.0183856	0.0233764	Platelet degranulation	Reactome	R-HSA-114608	ALB; VCL; FN1; HSPA5; A2M	3309; 2335; 7414; 2; 213	129	129
0.0187254	0.0235669	PI-3K cascade:FGFR3	Reactome	R-HSA-5654710	PTPN11; GRB2	2885; 5781	18	18
0.0187254	0.0235669	oxidative stress induced gene expression via nrf2	BioCarta	arenrf2pathway	PRKCA; JUN	3725; 5578	18	18
0.0187254	0.0235669	Deregulated CDK5 triggers multiple neurodegenerative pathways in Alzheimer,s disease models	Reactome	R-HSA-8862803	LMNA; JUN	4000; 3725	18	18
0.0187254	0.0235669	Neurodegenerative Diseases	Reactome	R-HSA-8863678	LMNA; JUN	4000; 3725	18	18
0.0187254	0.0235669	SHC-mediated cascade:FGFR3	Reactome	R-HSA-5654704	GRB2; SHC1	6464; 2885	18	18
0.0187254	0.0235669	Signaling by cytosolic FGFR1 fusion mutants	Reactome	R-HSA-1839117	GRB2; STAT1	6772; 2885	18	18
0.0187254	0.0235669	regulation of cell cycle progression by plk3	BioCarta	plk3pathway	CDK1; TP53	7157; 983	18	18
0.0187254	0.0235669	Activation of NF-kappaB in B cells	Reactome	R-HSA-1169091	NFKB1; IKBKG	8517; 4790	18	18
0.01895	0.0238194	G beta:gamma signalling through PI3Kgamma	Reactome	R-HSA-392451	AKT1; GRB2; SHC1	207; 2885; 6464	48	48
0.0195147	0.0244983	Factors involved in megakaryocyte development and platelet production	Reactome	R-HSA-983231	ABL1; PRKACA; CDK2; TP53; CDC42	1017; 998; 7157; 5566; 25	131	131
0.0200149	0.0250945	Cocaine addiction - Homo sapiens (human)	KEGG	path:hsa05030	NFKB1; JUN; PRKACA	3725; 4790; 5566	49	49
0.0207682	0.0258431	akt signaling pathway	BioCarta	aktpathway	AKT1; HSP90AA1	207; 3320	19	19
0.0207682	0.0258431	Metabolism of cofactors	Reactome	R-HSA-8978934	AKT1; HSP90AA1	207; 3320	19	19
0.0207682	0.0258431	prion pathway	BioCarta	prionpathway	RPSA; HSPA5	3309; 3921	19	19
0.0207682	0.0258431	Growth hormone receptor signaling	Reactome	R-HSA-982772	LYN; STAT1	4067; 6772	19	19
0.0207682	0.0258431	RHO GTPases activate CIT	Reactome	R-HSA-5625900	MYH10; MYH9	4628; 4627	19	19
0.0207682	0.0258431	Plasma lipoprotein assembly	Reactome	R-HSA-8963898	PRKACA; A2M	5566; 2	19	19
0.021046	0.026156	Longevity regulating pathway - Homo sapiens (human)	KEGG	path:hsa04211	NFKB1; PRKACA; TP53; AKT1	4790; 207; 5566; 7157	89	89
0.0211123	0.0262056	IGF1R signaling cascade	Reactome	R-HSA-2428924	PTPN11; GRB2; SHC1	5781; 2885; 6464	50	50
0.0222421	0.0275048	G-protein beta:gamma signalling	Reactome	R-HSA-397795	AKT1; GRB2; SHC1	207; 2885; 6464	51	51
0.0222421	0.0275048	Nuclear Envelope Breakdown	Reactome	R-HSA-2980766	PRKCA; CDK1; LMNA	5578; 983; 4000	51	51
0.0222421	0.0275048	Signaling by Type 1 Insulin-like Growth Factor 1 Receptor (IGF1R)	Reactome	R-HSA-2404192	PTPN11; GRB2; SHC1	5781; 2885; 6464	51	51
0.0224807	0.0277308	Mitotic Prometaphase	Reactome	R-HSA-68877	TUBB; CDK1; PRKACA; HSP90AA1; YWHAG; CSNK2A1	983; 1457; 5566; 7532; 3320; 203068	185	185
0.0224807	0.0277308	Transcriptional misregulation in cancer - Homo sapiens (human)	KEGG	path:hsa05202	TP53; SP1; DDX5; NFKB1; MYC; MDM2	4609; 6667; 4193; 1655; 4790; 7157	186	185
0.0226285	0.0278785	Morphine addiction - Homo sapiens (human)	KEGG	path:hsa05032	PRKCA; PRKACA; ARRB2; ARRB1	408; 409; 5566; 5578	91	91
0.0228993	0.0280037	lissencephaly gene (lis1) in neuronal migration and development	BioCarta	lis1pathway	ABL1; CSNK2A1	1457; 25	20	20
0.0228993	0.0280037	FRS-mediated FGFR3 signaling	Reactome	R-HSA-5654706	PTPN11; GRB2	2885; 5781	20	20
0.0228993	0.0280037	Sema4D induced cell migration and growth-cone collapse	Reactome	R-HSA-416572	MYH10; MYH9	4628; 4627	20	20
0.0228993	0.0280037	PI-3K cascade:FGFR4	Reactome	R-HSA-5654720	PTPN11; GRB2	5781; 2885	20	20
0.0228993	0.0280037	SHC-mediated cascade:FGFR4	Reactome	R-HSA-5654719	GRB2; SHC1	6464; 2885	20	20
0.0228993	0.0280037	JNK (c-Jun kinases) phosphorylation and activation mediated by activated human TAK1	Reactome	R-HSA-450321	IKBKG; TRAF6	7189; 8517	20	20
0.0231725	0.0282682	Apelin signaling pathway - Homo sapiens (human)	KEGG	path:hsa04371	AKT1; MAPK1; PRKACA; SMAD2; MAPK3	207; 5566; 5594; 5595; 4087	137	137
0.0231725	0.0282682	Ubiquitin mediated proteolysis - Homo sapiens (human)	KEGG	path:hsa04120	UBE2I; VHL; MDM2; BRCA1; TRAF6	7189; 4193; 7329; 7428; 672	137	137
0.0242818	0.0295487	Role of LAT2/NTAL/LAB on calcium mobilization	Reactome	R-HSA-2730905	LYN; GRB2; FYN; SHC1	4067; 2534; 6464; 2885	93	93
0.0242818	0.0295487	Formation of the beta-catenin:TCF transactivating complex	Reactome	R-HSA-201722	CTNNB1; MYC; EP300; SMARCA4	6597; 2033; 1499; 4609	94	93
0.0244839	0.0297583	Mitotic Anaphase	Reactome	R-HSA-68882	LMNA; RPS27A; UBA52; UBB; UBC	4000; 7311; 7314; 7316; 6233	139	139
0.024599	0.0298251	Influenza Life Cycle	Reactome	R-HSA-168255	HSP90AA1; KPNB1; CLTC	1213; 3320; 3837	53	53
0.024599	0.0298251	Ca2+ pathway	Reactome	R-HSA-4086398	PRKCA; CTNNB1; MYC	5578; 1499; 4609	53	53
0.0251164	0.0301704	downregulated of mta-3 in er-negative breast tumors	BioCarta	mta3pathway	GAPDH; ESR1	2099; 2597	21	21
0.0251164	0.0301704	phosphoinositides and their downstream targets	BioCarta	ptdinspathway	AKT1; LYN	4067; 207	21	21
0.0251164	0.0301704	pkc-catalyzed phosphorylation of inhibitory phosphoprotein of myosin phosphatase	BioCarta	myosinpathway	PRKCA; VAV1	5578; 7409	23	21
0.0251164	0.0301704	PI-3K cascade:FGFR1	Reactome	R-HSA-5654689	PTPN11; GRB2	5781; 2885	21	21
0.0251164	0.0301704	SHC-mediated cascade:FGFR1	Reactome	R-HSA-5654688	GRB2; SHC1	6464; 2885	21	21
0.0251164	0.0301704	activated TAK1 mediates p38 MAPK activation	Reactome	R-HSA-450302	IKBKG; TRAF6	7189; 8517	21	21
0.0251351	0.0301704	Integration of energy metabolism	Reactome	R-HSA-163685	PRKCA; PRKACA; RAP1A; SLC25A5	5578; 292; 5566; 5906	94	94
0.0251351	0.0301704	Interferon gamma signaling	Reactome	R-HSA-877300	HLA-B; PTPN11; PRKCD; STAT1	5580; 6772; 5781; 3106	94	94
0.0251572	0.0301704	Mitotic Metaphase and Anaphase	Reactome	R-HSA-2555396	LMNA; RPS27A; UBA52; UBB; UBC	4000; 7311; 7314; 7316; 6233	140	140
0.0258422	0.0309545	Late Phase of HIV Life Cycle	Reactome	R-HSA-162599	SSRP1; UBA52; RPS27A; UBB; UBC	7311; 7314; 6749; 7316; 6233	143	141
0.0268957	0.0321777	Circadian entrainment - Homo sapiens (human)	KEGG	path:hsa04713	PRKCA; MAPK3; MAPK1; PRKACA	5566; 5578; 5594; 5595	96	96
0.0274172	0.0326051	ERK/MAPK targets	Reactome	R-HSA-198753	MAPK3; MAPK1	5595; 5594	22	22
0.0274172	0.0326051	FRS-mediated FGFR4 signaling	Reactome	R-HSA-5654712	PTPN11; GRB2	5781; 2885	22	22
0.0274172	0.0326051	E2F mediated regulation of DNA replication	Reactome	R-HSA-113510	CDK1; RB1	5925; 983	22	22
0.0274172	0.0326051	Interleukin-6 family signaling	Reactome	R-HSA-6783589	PTPN11; STAT1	6772; 5781	22	22
0.0274172	0.0326051	role of brca1 brca2 and atr in cancer susceptibility	BioCarta	atrbrcapathway	BRCA1; TP53	7157; 672	22	22
0.0279688	0.0332213	Adrenergic signaling in cardiomyocytes - Homo sapiens (human)	KEGG	path:hsa04261	PRKCA; AKT1; MAPK1; PRKACA; MAPK3	207; 5566; 5578; 5594; 5595	144	144
0.0283773	0.0336261	Golgi Associated Vesicle Biogenesis	Reactome	R-HSA-432722	HSPA8; CLTC; ARRB1	3312; 408; 1213	56	56
0.0283773	0.0336261	Deadenylation-dependent mRNA decay	Reactome	R-HSA-429914	LSM4; PABPC1; EIF4A3	26986; 9775; 25804	56	56
0.0296722	0.034936	FCERI mediated NF-kB activation	Reactome	R-HSA-2871837	NFKB1; LYN; IKBKG; TRAF6	4067; 4790; 8517; 7189	99	99
0.0297994	0.034936	SHC-mediated cascade:FGFR2	Reactome	R-HSA-5654699	GRB2; SHC1	2885; 6464	23	23
0.0297994	0.034936	caspase cascade in apoptosis	BioCarta	caspasepathway	LMNA; PARP1	4000; 142	23	23
0.0297994	0.034936	induction of apoptosis through dr3 and dr4/5 death receptors	BioCarta	deathpathway	LMNA; PARP1	4000; 142	23	23
0.0297994	0.034936	ctcf: first multivalent nuclear factor	BioCarta	ctcfpathway	MDM2; MYC	4193; 4609	23	23
0.0297994	0.034936	FRS-mediated FGFR1 signaling	Reactome	R-HSA-5654693	PTPN11; GRB2	5781; 2885	23	23
0.0297994	0.034936	PI-3K cascade:FGFR2	Reactome	R-HSA-5654695	PTPN11; GRB2	5781; 2885	23	23
0.0297994	0.034936	Regulation of TNFR1 signaling	Reactome	R-HSA-5357905	IKBKG; TNFRSF1A	7132; 8517	23	23
0.0297994	0.034936	TP53 regulates transcription of additional cell cycle genes whose exact role in the p53 pathway remain uncertain	Reactome	R-HSA-6804115	NPM1; TP53	7157; 4869	23	23
0.0310577	0.0362827	rRNA modification in the nucleus and cytosol	Reactome	R-HSA-6790901	RPS7; RPS2; RPS9	6203; 6187; 6201	59	58
0.0310577	0.0362827	rRNA processing in the nucleus and cytosol	Reactome	R-HSA-8868773	RPS7; RPS2; RPS9	6203; 6187; 6201	59	58
0.0310577	0.0362827	mRNA 3,-end processing	Reactome	R-HSA-72187	NUDT21; U2AF2; EIF4A3	11338; 11051; 9775	58	58
0.0317544	0.037053	Non-alcoholic fatty liver disease (NAFLD) - Homo sapiens (human)	KEGG	path:hsa04932	CDC42; NFKB1; TNFRSF1A; JUN; AKT1	3725; 4790; 207; 7132; 998	149	149
0.0322608	0.0374678	segmentation clock	BioCarta	hespathway	CTNNB1; CSNK2A1	1499; 1457	24	24
0.0322608	0.0374678	Antigen Presentation: Folding, assembly and peptide loading of class I MHC	Reactome	R-HSA-983170	HLA-B; HSPA5	3106; 3309	24	24
0.0322608	0.0374678	Sema4D in semaphorin signaling	Reactome	R-HSA-400685	MYH10; MYH9	4628; 4627	24	24
0.0322608	0.0374678	Resolution of AP sites via the multiple-nucleotide patch replacement pathway	Reactome	R-HSA-110373	PCNA; PARP1	5111; 142	24	24
0.0326125	0.037832	Stimuli-sensing channels	Reactome	R-HSA-2672351	UBA52; RPS27A; UBB; UBC	7311; 7314; 7316; 6233	102	102
0.0347993	0.0400414	Constitutive Signaling by AKT1 E17K in Cancer	Reactome	R-HSA-5674400	AKT1; MDM2	207; 4193	25	25
0.0347993	0.0400414	skeletal muscle hypertrophy is regulated via akt-mtor pathway	BioCarta	igf1mtorpathway	AKT1; PABPC1	207; 26986	25	25
0.0347993	0.0400414	Cyclin A/B1/B2 associated events during G2/M transition	Reactome	R-HSA-69273	CDK1; CDK2	1017; 983	25	25
0.0347993	0.0400414	RAF activation	Reactome	R-HSA-5673000	PHB; SRC	5245; 6714	25	25
0.0347993	0.0400414	Nuclear Events (kinase and transcription factor activation)	Reactome	R-HSA-198725	MAPK3; MAPK1	5595; 5594	25	25
0.0347993	0.0400414	FRS-mediated FGFR2 signaling	Reactome	R-HSA-5654700	PTPN11; GRB2	5781; 2885	25	25
0.0347993	0.0400414	Deadenylation of mRNA	Reactome	R-HSA-429947	PABPC1; EIF4A3	26986; 9775	25	25
0.0368027	0.0422976	Longevity regulating pathway - multiple species - Homo sapiens (human)	KEGG	path:hsa04213	AKT1; HSPA8; PRKACA	3312; 5566; 207	62	62
0.0374126	0.0428498	signaling pathway from g-protein families	BioCarta	gpcrpathway	PRKCA; MAPK3	5578; 5595	26	26
0.0374126	0.0428498	Regulation of IFNA signaling	Reactome	R-HSA-912694	PTPN11; STAT1	5781; 6772	26	26
0.0374126	0.0428498	TNFR1-induced NFkappaB signaling pathway	Reactome	R-HSA-5357956	IKBKG; TNFRSF1A	7132; 8517	26	26
0.0378191	0.0432655	Class I MHC mediated antigen processing & presentation	Reactome	R-HSA-983169	HSPA5; HLA-B; RPS27A; VHL; UBA52; IKBKG; UBB; UBC	3309; 7428; 8517; 3106; 7314; 7311; 7316; 6233	324	323
0.0383184	0.0436856	Basal cell carcinoma - Homo sapiens (human)	KEGG	path:hsa05217	CTNNB1; APC; TP53	324; 1499; 7157	63	63
0.0383184	0.0436856	Influenza Infection	Reactome	R-HSA-168254	HSP90AA1; KPNB1; CLTC	1213; 3320; 3837	63	63
0.0383184	0.0436856	Cytosolic DNA-sensing pathway - Homo sapiens (human)	KEGG	path:hsa04623	NFKB1; IKBKG; IKBKE	9641; 8517; 4790	64	63
0.0398655	0.0453973	rRNA processing	Reactome	R-HSA-72312	RPS7; RPS2; RPS9	6203; 6187; 6201	65	64
0.0400988	0.0456107	Interleukin receptor SHC signaling	Reactome	R-HSA-912526	GRB2; SHC1	2885; 6464	27	27
0.0406589	0.0461949	G alpha (q) signalling events	Reactome	R-HSA-416476	PRKCA; EGFR; PRKCD; MAPK3; GRB2; MAPK1	5594; 5580; 5578; 1956; 2885; 5595	213	213
0.0436084	0.0494893	Serotonergic synapse - Homo sapiens (human)	KEGG	path:hsa04726	PRKCA; MAPK3; MAPK1; PRKACA	5566; 5578; 5594; 5595	113	112
0.0446943	0.050606	Cleavage of Growing Transcript in the Termination Region	Reactome	R-HSA-109688	NUDT21; U2AF2; EIF4A3	11338; 11051; 9775	67	67
0.0446943	0.050606	RNA Polymerase II Transcription Termination	Reactome	R-HSA-73856	NUDT21; U2AF2; EIF4A3	11338; 11051; 9775	67	67
0.0456813	0.0516058	Disassembly of the destruction complex and recruitment of AXIN to the membrane	Reactome	R-HSA-4641262	CTNNB1; APC	1499; 324	29	29
0.0456813	0.0516058	The role of Nef in HIV-1 replication and disease pathogenesis	Reactome	R-HSA-164952	FYN; LCK	3932; 2534	29	29
0.0459536	0.0518545	Protein processing in endoplasmic reticulum - Homo sapiens (human)	KEGG	path:hsa04141	HSP90AB1; HSP90AA1; HSPA8; HSPA5; HSP90B1	7184; 3309; 3312; 3320; 3326	165	165
0.0460289	0.0518805	Glutamatergic synapse - Homo sapiens (human)	KEGG	path:hsa04724	PRKCA; MAPK3; MAPK1; PRKACA	5566; 5578; 5594; 5595	114	114
0.0463657	0.0522009	Amphetamine addiction - Homo sapiens (human)	KEGG	path:hsa05031	PRKCA; PRKACA; JUN	3725; 5566; 5578	68	68
0.0480678	0.0540558	Nonhomologous End-Joining (NHEJ)	Reactome	R-HSA-5693571	BRCA1; XRCC6; PRKDC	5591; 2547; 672	70	69
0.0485736	0.0545629	Downstream signaling events of B Cell Receptor (BCR)	Reactome	R-HSA-1168372	NFKB1; IKBKG	4790; 8517	30	30
0.0498002	0.0558775	Interferon alpha/beta signaling	Reactome	R-HSA-909733	HLA-B; PTPN11; STAT1	6772; 5781; 3106	70	70

## Sheet: PPI_M1_topN_paths.tab
p-value	q-value	pathway	source	external_id	members_input_overlap	members_input_overlap_geneids	size	effective_size
5.46335e-70	5.30492e-67	Metabolism of RNA	Reactome	R-HSA-8953854	RPS13; RPS11; RPL26; RPL5; ELAVL1; SF3B3; RPL9; RPL6; RPL7; RPL27A; RPS18; SF3B1; RPS15A; SF3B2; RPS7; AKT1; HNRNPH1; RPS2; DHX15; NUDT21; PRPF3; RPS9; RPS8; SNRNP200; RPL7A; SRSF1; RPL8; SRSF2; U2AF1; RPL24; PRPF31; U2AF2; RPL21; HNRNPU; PRPF40A; RPS26P25; HNRNPK; HNRNPM; SF3A2; PABPC1; HNRNPC; HNRNPD; RPS19; HNRNPF; SF3A1; RPL10; DHX9; CDC5L; HSPA8; RPS23; UPF1; HSPB1; PRKCA; RPS16; HNRNPA1; LS…	207; 6426; 5578; 9972; 23020; 10419; 6133; 6144; 988; 6130; 6189; 6191; 23451; 22938; 11338; 1660; 6135; 6187; 1994; 5430; 6152; 3192; 3184; 6210; 55660; 6136; 11051; 23524; 9129; 6222; 1655; 6157; 7311; 3312; 23450; 6194; 3187; 6203; 6201; 6629; 1665; 6427; 6626; 6188; 26121; 6228; 6132; 3315; 6125; 5976; 1974; 57819; 7307; 6159; 6129; 3921; 3190; 6233; 6137; 3183; 4670; 26986; 728937; 4904; 613…	586	584
7.28333e-52	3.53606e-49	Nonsense Mediated Decay (NMD) independent of the Exon Junction Complex (EJC)	Reactome	R-HSA-975956	RPS13; RPS11; RPL5; RPS16; RPL8; RPL9; RPL6; RPL7; RPS19; RPS27A; RPS15A; RPS7; RPS6; RPS3; RPS2; RPS9; RPS8; RPL7A; RPL29; RPL24; RPL26; RPL21; RPL23; RPS26P25; PABPC1; RPL27A; RPS18; RPS23; RPS20; RPL14; RPL10; RPL11; RPL12; RPL13; RPS4X; RPL18; RPSA; RPL31; UBA52; RPS3A; UPF1	6203; 6137; 6189; 26986; 6233; 6134; 6205; 728937; 6210; 6133; 6144; 6223; 6157; 6202; 6136; 6160; 6188; 6130; 6201; 6154; 9349; 6129; 6228; 6132; 6222; 7311; 9045; 6191; 6125; 6224; 5976; 6194; 6128; 6207; 6141; 6152; 6135; 6217; 6159; 3921; 6187	106	105
2.78689e-51	6.76518e-49	Nonsense Mediated Decay (NMD) enhanced by the Exon Junction Complex (EJC)	Reactome	R-HSA-975957	RPS13; RPS11; RPL5; RPS16; RPL8; RPL9; RPL6; RPL7; RPS19; RPS27A; RPS15A; RPS7; RPS6; RPS3; RPS2; RPS9; RPS8; RPL7A; RPL29; RPL24; RPL26; RPL21; RPL23; RPS26P25; PABPC1; RPL27A; RPS18; RPS23; RPS20; RPL14; RPL10; RPL11; RPL12; RPL13; RPS4X; RPL18; RPSA; RPL31; UBA52; RPS3A; UPF1; EIF4A3	6203; 6137; 6189; 26986; 6233; 6134; 6205; 728937; 6210; 6133; 6144; 6223; 6157; 6202; 6136; 6160; 6188; 6130; 6201; 6154; 9349; 6129; 6228; 6132; 6222; 7311; 9045; 6191; 6125; 6224; 5976; 6194; 6128; 6207; 9775; 6141; 6152; 6135; 6217; 6159; 3921; 6187	118	117
2.78689e-51	6.76518e-49	Nonsense-Mediated Decay (NMD)	Reactome	R-HSA-927802	RPS13; RPS11; RPL5; RPS16; RPL8; RPL9; RPL6; RPL7; RPS19; RPS27A; RPS15A; RPS7; RPS6; RPS3; RPS2; RPS9; RPS8; RPL7A; RPL29; RPL24; RPL26; RPL21; RPL23; RPS26P25; PABPC1; RPL27A; RPS18; RPS23; RPS20; RPL14; RPL10; RPL11; RPL12; RPL13; RPS4X; RPL18; RPSA; RPL31; UBA52; RPS3A; UPF1; EIF4A3	6203; 6137; 6189; 26986; 6233; 6134; 6205; 728937; 6210; 6133; 6144; 6223; 6157; 6202; 6136; 6160; 6188; 6130; 6201; 6154; 9349; 6129; 6228; 6132; 6222; 7311; 9045; 6191; 6125; 6224; 5976; 6194; 6128; 6207; 9775; 6141; 6152; 6135; 6217; 6159; 3921; 6187	118	117
4.27177e-51	8.29578e-49	Peptide chain elongation	Reactome	R-HSA-156902	RPS13; RPS11; RPL5; RPS16; RPL8; RPL9; RPL6; RPL7; RPS19; RPS27A; RPS15A; RPS7; RPS6; RPS3; RPS2; RPS9; RPS8; RPL7A; RPL29; RPL24; RPL26; RPL21; RPL23; RPS26P25; EEF1A1; RPL27A; RPS18; RPS23; RPS20; RPL14; RPL10; RPL11; RPL12; RPL13; RPS4X; RPL18; RPSA; RPL31; UBA52; RPS3A	6203; 6137; 6189; 6134; 6205; 728937; 6210; 6133; 6144; 6223; 6157; 6233; 6202; 6136; 6160; 6188; 6130; 6201; 6154; 9349; 6129; 6228; 6132; 6222; 7311; 9045; 6191; 6125; 6224; 6194; 6128; 6207; 6141; 6152; 6135; 6217; 6159; 1915; 3921; 6187	101	100
4.76551e-50	7.71218e-48	Eukaryotic Translation Elongation	Reactome	R-HSA-156842	RPS13; RPS11; RPL5; RPS16; RPL8; RPL9; RPL6; RPL7; RPS19; RPS27A; RPS15A; RPS7; RPS6; RPS3; RPS2; RPS9; RPS8; RPL7A; RPL29; RPL24; RPL26; RPL21; RPL23; RPS26P25; EEF1A1; RPL27A; RPS18; RPS23; RPS20; RPL14; RPL10; RPL11; RPL12; RPL13; RPS4X; RPL18; RPSA; RPL31; UBA52; RPS3A	6203; 6137; 6189; 6233; 6134; 6205; 728937; 6210; 6133; 6144; 6223; 6157; 6202; 6136; 6160; 6188; 6130; 6201; 6154; 9349; 6129; 6228; 6132; 6222; 7311; 9045; 6191; 6125; 6224; 6194; 6128; 6207; 6141; 6152; 6135; 6217; 6159; 1915; 3921; 6187	106	105
1.18959e-48	1.44387e-46	Eukaryotic Translation Termination	Reactome	R-HSA-72764	RPS13; RPS11; RPL5; RPS16; RPL8; RPL9; RPL6; RPL7; RPS19; RPS27A; RPS15A; RPS7; RPS6; RPS3; RPS2; RPS9; RPS8; RPL7A; RPL29; RPL24; RPL26; RPL21; RPL23; RPS26P25; RPL27A; RPS18; RPS23; RPS20; RPL14; RPL10; RPL11; RPL12; RPL13; RPS4X; RPL18; RPSA; RPL31; UBA52; RPS3A	6203; 6137; 6189; 6233; 6134; 6205; 728937; 6210; 6133; 6144; 6223; 6157; 6202; 6136; 6160; 6188; 6130; 6201; 6154; 9349; 6129; 6228; 6132; 6222; 7311; 9045; 6191; 6125; 6224; 6194; 6128; 6207; 6141; 6152; 6135; 6217; 6159; 3921; 6187	104	103
1.18959e-48	1.44387e-46	Selenocysteine synthesis	Reactome	R-HSA-2408557	RPS13; RPS11; RPL5; RPS16; RPL8; RPL9; RPL6; RPL7; RPS19; RPS27A; RPS15A; RPS7; RPS6; RPS3; RPS2; RPS9; RPS8; RPL7A; RPL29; RPL24; RPL26; RPL21; RPL23; RPS26P25; RPL27A; RPS18; RPS23; RPS20; RPL14; RPL10; RPL11; RPL12; RPL13; RPS4X; RPL18; RPSA; RPL31; UBA52; RPS3A	6203; 6137; 6189; 6233; 6134; 6205; 728937; 6210; 6133; 6144; 6223; 6157; 6202; 6136; 6160; 6188; 6130; 6201; 6154; 9349; 6129; 6228; 6132; 6222; 7311; 9045; 6191; 6125; 6224; 6194; 6128; 6207; 6141; 6152; 6135; 6217; 6159; 3921; 6187	104	103
1.84717e-48	1.9929e-46	L13a-mediated translational silencing of Ceruloplasmin expression	Reactome	R-HSA-156827	RPS13; RPS11; RPL5; RPS16; RPL8; RPL9; RPL6; RPL7; RPS19; RPS27A; RPS15A; RPS7; RPS6; RPS3; RPS2; RPS9; RPS8; RPL7A; RPL29; RPL24; RPL26; RPL21; RPL23; RPS26P25; PABPC1; RPL27A; RPS18; RPS23; RPS20; RPL14; RPL10; RPL11; RPL12; RPL13; RPS4X; RPL18; RPSA; RPL31; UBA52; RPS3A; EIF4A2	6203; 6137; 6189; 26986; 6233; 6134; 6205; 728937; 6210; 6133; 6144; 6223; 6157; 6202; 6136; 6160; 6188; 6130; 6201; 6154; 9349; 6129; 6228; 6132; 6222; 7311; 9045; 6191; 6125; 6224; 6194; 6128; 6207; 1974; 6141; 6152; 6135; 6217; 6159; 3921; 6187	125	123
3.8264e-47	3.37767e-45	Cap-dependent Translation Initiation	Reactome	R-HSA-72737	RPS13; RPS11; RPL5; RPS16; RPL8; RPL9; RPL6; RPL7; RPS19; RPS27A; RPS15A; RPS7; RPS6; RPS3; RPS2; RPS9; RPS8; RPL7A; RPL29; RPL24; RPL26; RPL21; RPL23; RPS26P25; PABPC1; RPL27A; RPS18; RPS23; RPS20; RPL14; RPL10; RPL11; RPL12; RPL13; RPS4X; RPL18; RPSA; RPL31; UBA52; RPS3A; EIF4A2	6203; 6137; 6189; 26986; 6233; 6134; 6205; 728937; 6210; 6133; 6144; 6223; 6157; 6202; 6136; 6160; 6188; 6130; 6201; 6154; 9349; 6129; 6228; 6132; 6222; 7311; 9045; 6191; 6125; 6224; 6194; 6128; 6207; 1974; 6141; 6152; 6135; 6217; 6159; 3921; 6187	133	131
3.8264e-47	3.37767e-45	Eukaryotic Translation Initiation	Reactome	R-HSA-72613	RPS13; RPS11; RPL5; RPS16; RPL8; RPL9; RPL6; RPL7; RPS19; RPS27A; RPS15A; RPS7; RPS6; RPS3; RPS2; RPS9; RPS8; RPL7A; RPL29; RPL24; RPL26; RPL21; RPL23; RPS26P25; PABPC1; RPL27A; RPS18; RPS23; RPS20; RPL14; RPL10; RPL11; RPL12; RPL13; RPS4X; RPL18; RPSA; RPL31; UBA52; RPS3A; EIF4A2	6203; 6137; 6189; 26986; 6233; 6134; 6205; 728937; 6210; 6133; 6144; 6223; 6157; 6202; 6136; 6160; 6188; 6130; 6201; 6154; 9349; 6129; 6228; 6132; 6222; 7311; 9045; 6191; 6125; 6224; 6194; 6128; 6207; 1974; 6141; 6152; 6135; 6217; 6159; 3921; 6187	133	131
9.35549e-47	7.57015e-45	Formation of a pool of free 40S subunits	Reactome	R-HSA-72689	RPS13; RPS11; RPL5; RPS16; RPL8; RPL9; RPL6; RPL7; RPS19; RPS27A; RPS15A; RPS7; RPS6; RPS3; RPS2; RPS9; RPS8; RPL7A; RPL29; RPL24; RPL26; RPL21; RPL23; RPS26P25; RPL27A; RPS18; RPS23; RPS20; RPL14; RPL10; RPL11; RPL12; RPL13; RPS4X; RPL18; RPSA; RPL31; UBA52; RPS3A	6203; 6137; 6189; 6233; 6134; 6205; 728937; 6210; 6133; 6144; 6223; 6157; 6202; 6136; 6160; 6188; 6130; 6201; 6154; 9349; 6129; 6228; 6132; 6222; 7311; 9045; 6191; 6125; 6224; 6194; 6128; 6207; 6141; 6152; 6135; 6217; 6159; 3921; 6187	115	113
1.38241e-46	1.03255e-44	GTP hydrolysis and joining of the 60S ribosomal subunit	Reactome	R-HSA-72706	RPS13; RPS11; RPL5; RPS16; RPL8; RPL9; RPL6; RPL7; RPS19; RPS27A; RPS15A; RPS7; RPS6; RPS3; RPS2; RPS9; RPS8; RPL7A; RPL29; RPL24; RPL26; RPL21; RPL23; RPS26P25; RPL27A; RPS18; RPS23; RPS20; RPL14; RPL10; RPL11; RPL12; RPL13; RPS4X; RPL18; RPSA; RPL31; UBA52; RPS3A; EIF4A2	6203; 6137; 6189; 6233; 6134; 6205; 728937; 6210; 6133; 6144; 6223; 6157; 6202; 6136; 6160; 6188; 6130; 6201; 6154; 9349; 6129; 6228; 6132; 6222; 7311; 9045; 6191; 6125; 6224; 6194; 6128; 6207; 1974; 6141; 6152; 6135; 6217; 6159; 3921; 6187	126	124
4.62528e-45	3.20796e-43	SRP-dependent cotranslational protein targeting to membrane	Reactome	R-HSA-1799339	RPS13; RPS11; RPL5; RPS16; RPL8; RPL9; RPL6; RPL7; RPS19; RPS27A; RPS15A; RPS7; RPS6; RPS3; RPS2; RPS9; RPS8; RPL7A; RPL29; RPL24; RPL26; RPL21; RPL23; RPS26P25; RPL27A; RPS18; RPS23; RPS20; RPL14; RPL10; RPL11; RPL12; RPL13; RPS4X; RPL18; RPSA; RPL31; UBA52; RPS3A	6203; 6137; 6189; 6233; 6134; 6205; 728937; 6210; 6133; 6144; 6223; 6157; 6202; 6136; 6160; 6188; 6130; 6201; 6154; 9349; 6129; 6228; 6132; 6222; 7311; 9045; 6191; 6125; 6224; 6194; 6128; 6207; 6141; 6152; 6135; 6217; 6159; 3921; 6187	124	123
2.81211e-44	1.82037e-42	Selenoamino acid metabolism	Reactome	R-HSA-2408522	RPS13; RPS11; RPS16; RPL8; RPL9; RPL6; RPL7; RPS19; RPS18; RPS15A; RPS7; RPS6; RPS3; RPS2; RPS9; RPS8; RPL7A; RPL29; RPL24; RPL26; RPL21; RPL23; RPS26P25; RPL27A; RPL5; RPS23; RPS20; RPL14; RPL10; RPL11; RPL12; RPL13; RPS4X; RPS27A; RPL18; RPSA; RPL31; UBA52; RPS3A	6203; 6137; 6134; 6205; 728937; 6210; 6133; 6144; 6223; 6157; 6202; 6136; 6160; 6188; 6130; 6201; 9349; 6129; 6228; 6189; 6154; 6132; 6222; 7311; 9045; 6191; 6125; 6224; 6194; 6128; 6207; 6141; 6152; 6135; 6217; 6159; 3921; 6187; 6233	129	128
2.58567e-39	1.56918e-37	Ribosome - Homo sapiens (human)	KEGG	path:hsa03010	RPS13; RPS11; RPL5; RPS16; RPL8; RPL9; RPL6; RPL7; RPL27A; RPS18; RPS15A; RPS7; RPS6; RPS3; RPS2; RPS9; RPS8; RPL7A; RPL29; RPL24; RPL26; RPL21; RPL23; RPS19; RPS27A; RPS23; RPS20; RPL14; RPL10; RPL11; RPL12; RPL13; RPS4X; RPL18; RPSA; RPL31; UBA52; RPS3A	6144; 6152; 6154; 6157; 6159; 6187; 6188; 6189; 6191; 6194; 6201; 6202; 6203; 6205; 6207; 6210; 6217; 6222; 6223; 6224; 6228; 6233; 6160; 9349; 7311; 3921; 9045; 6125; 6128; 6129; 6130; 6132; 6133; 6134; 6135; 6136; 6137; 6141	154	153
3.73326e-35	2.13235e-33	mRNA Splicing - Major Pathway	Reactome	R-HSA-72163	ELAVL1; HSPA8; SF3B1; SF3B3; SF3B2; HNRNPH1; DHX15; PRPF3; NUDT21; SNRNP200; SRSF1; SRSF2; U2AF1; PRPF31; U2AF2; HNRNPU; PRPF40A; HNRNPK; HNRNPM; SF3A2; SNRNP70; HNRNPD; HNRNPF; SF3A1; DHX9; CDC5L; HNRNPA1; LSM2; SNW1; POLR2A; SNRPA; SNRPB2; HNRNPC; SRRM2; DDX5; YBX1; EIF4A3	6426; 1994; 3183; 3192; 4670; 4904; 55660; 6629; 10992; 988; 5430; 6626; 8175; 6625; 3185; 23020; 11051; 23451; 10291; 26121; 3184; 9129; 22938; 1655; 3178; 9775; 1665; 6427; 3312; 23450; 11338; 23524; 57819; 3187; 1660; 7307; 3190	178	178
2.11839e-34	1.14275e-32	mRNA Splicing	Reactome	R-HSA-72172	ELAVL1; HSPA8; SF3B1; SF3B3; SF3B2; HNRNPH1; DHX15; PRPF3; NUDT21; SNRNP200; SRSF1; SRSF2; U2AF1; PRPF31; U2AF2; HNRNPU; PRPF40A; HNRNPK; HNRNPM; SF3A2; SNRNP70; HNRNPD; HNRNPF; SF3A1; DHX9; CDC5L; HNRNPA1; LSM2; SNW1; POLR2A; SNRPA; SNRPB2; HNRNPC; SRRM2; DDX5; YBX1; EIF4A3	6426; 1994; 3183; 3192; 4670; 4904; 55660; 6629; 10992; 988; 5430; 6626; 8175; 6625; 3185; 23020; 11051; 23451; 10291; 26121; 3184; 9129; 22938; 1655; 3178; 9775; 1665; 6427; 3312; 23450; 11338; 23524; 57819; 3187; 1660; 7307; 3190	186	186
4.54226e-32	2.32133e-30	Translation	Reactome	R-HSA-72766	RPS13; RPS11; RPS16; RPL8; RPL9; RPL6; PABPC1; RPL27A; RPL5; RPS18; RPS15A; RPS7; RPS6; RPS3; RPS2; RPS9; RPS8; RPL7A; RPL29; RPL24; RPL26; RPL21; RPL23; RPS26P25; EEF1A1; RPS19; RPS27A; RPS23; RPS20; RPL7; RPL14; RPL10; RPL11; RPL12; RPL13; RPS4X; RPL18; RPSA; RPL31; UBA52; RPS3A; EIF4A2	6137; 6133; 6205; 26986; 6233; 1974; 6134; 728937; 6135; 6210; 6144; 6125; 6157; 6136; 6202; 6160; 6188; 6222; 6130; 6201; 6217; 9349; 6228; 6187; 6223; 6132; 6154; 9045; 6191; 3921; 6224; 6128; 6189; 6194; 6207; 6152; 7311; 6141; 6159; 1915; 6129; 6203	310	307
2.0839e-31	1.01173e-29	Processing of Capped Intron-Containing Pre-mRNA	Reactome	R-HSA-72203	ELAVL1; HSPA8; SF3B1; SF3B3; SF3B2; HNRNPH1; DHX15; NUDT21; PRPF3; SNRNP200; SRSF1; SRSF2; U2AF1; PRPF31; U2AF2; HNRNPU; PRPF40A; HNRNPK; HNRNPM; SF3A2; SNRNP70; HNRNPD; HNRNPF; SF3A1; DHX9; CDC5L; HNRNPA1; LSM2; SNW1; POLR2A; SNRPA; SNRPB2; HNRNPC; SRRM2; NUP153; DDX5; YBX1; EIF4A3	6426; 1994; 9972; 3183; 3192; 4670; 4904; 23524; 6629; 10992; 988; 5430; 6626; 8175; 6625; 3185; 23020; 11051; 23451; 10291; 26121; 3184; 9129; 1655; 3178; 9775; 1665; 6427; 3312; 23450; 55660; 11338; 57819; 3187; 1660; 7307; 3190; 22938	240	240
4.074e-28	1.88374e-26	Spliceosome - Homo sapiens (human)	KEGG	path:hsa03040	HSPA8; SF3B1; SF3B3; SF3B2; DHX15; PRPF3; SNRNP200; SRSF1; SRSF2; U2AF1; PRPF31; U2AF2; HNRNPU; PRPF40A; HNRNPK; SF3A1; SF3A2; HNRNPC; HNRNPM; CDC5L; TCERG1; HNRNPA1; LSM2; SNRPB2; SNRPA; SNW1; SNRNP70; DDX5; EIF4A3	26121; 9775; 10291; 4670; 11338; 3183; 3190; 1655; 3192; 3178; 1665; 55660; 7307; 10915; 3312; 6426; 23450; 23451; 22938; 10992; 9129; 57819; 988; 6625; 6626; 6629; 23020; 8175; 6427	134	134
5.03531e-27	2.2224e-25	Metabolism of amino acids and derivatives	Reactome	R-HSA-71291	RPS13; RPS11; RPS16; RPL8; RPL9; RPL6; RPL7; RPL27A; RPS18; RPS15A; RPS7; RPS6; RPS3; RPS2; RPS9; RPS8; RPL7A; RPL29; RPL24; RPL26; RPL21; RPL23; RPS26P25; RPS19; RPL5; RPS23; RPS20; RPL14; RPL10; RPL11; RPL12; RPL13; RPS4X; RPS27A; RPL18; RPSA; RPL31; UBA52; RPS3A	6203; 6137; 728937; 6205; 6135; 6210; 6144; 6159; 6157; 6134; 6136; 6160; 6188; 6130; 6201; 6228; 6189; 6187; 6132; 6222; 6141; 6154; 7311; 9045; 6133; 6191; 6125; 6224; 6194; 6128; 6207; 6152; 6217; 6129; 6223; 3921; 6202; 9349; 6233	338	335
1.81849e-24	7.6772e-23	Translation initiation complex formation	Reactome	R-HSA-72649	RPS13; RPS26P25; RPS11; RPS27A; RPS20; RPS23; RPSA; PABPC1; RPS19; RPS18; RPS4X; RPS15A; RPS7; RPS6; RPS3A; RPS2; RPS16; RPS3; RPS8; RPS9; EIF4A2	6228; 6223; 6203; 6194; 6207; 1974; 6222; 6205; 6202; 6189; 26986; 6217; 6188; 6201; 3921; 6187; 728937; 6191; 6233; 6224; 6210	68	66
2.62087e-24	1.06036e-22	Activation of the mRNA upon binding of the cap-binding complex and eIFs, and subsequent binding to 43S	Reactome	R-HSA-72662	RPS13; RPS26P25; RPS11; RPS27A; RPS20; RPS23; RPSA; PABPC1; RPS19; RPS18; RPS4X; RPS15A; RPS7; RPS6; RPS3A; RPS2; RPS16; RPS3; RPS8; RPS9; EIF4A2	6228; 6223; 6203; 6194; 6207; 1974; 6222; 6189; 26986; 6217; 6188; 6201; 3921; 6187; 6205; 728937; 6202; 6191; 6233; 6224; 6210	69	67
7.41793e-23	2.88112e-21	Ribosomal scanning and start codon recognition	Reactome	R-HSA-72702	RPS13; RPS26P25; RPS11; RPS27A; RPS20; RPS23; RPSA; RPS4X; RPS19; RPS18; RPS15A; RPS7; RPS6; RPS3A; RPS2; RPS16; RPS3; RPS8; RPS9; EIF4A2	6228; 6223; 6203; 6194; 6207; 1974; 6222; 6205; 6202; 6189; 6217; 6188; 6201; 3921; 6187; 728937; 6191; 6233; 6224; 6210	68	66
2.43706e-22	9.10149e-21	Formation of the ternary complex, and subsequently, the 43S complex	Reactome	R-HSA-72695	RPS13; RPS26P25; RPS11; RPS27A; RPS20; RPS23; RPSA; RPS4X; RPS19; RPS18; RPS15A; RPS7; RPS6; RPS3A; RPS2; RPS16; RPS3; RPS9; RPS8	6228; 6223; 6203; 6194; 6207; 6222; 6202; 6189; 6217; 6188; 6201; 3921; 6187; 6205; 728937; 6191; 6233; 6224; 6210	61	59
1.33288e-18	4.79344e-17	Metabolism of proteins	Reactome	R-HSA-392499	RPS13; PCNA; RPS11; RPS16; HSPA5; RPL9; RPL6; RPL7; RPL27A; RPL5; RPS18; SMAD2; SMAD3; RPS7; RPS6; ARRB2; IKBKG; ARRB1; RPS3; RPS9; RPS8; RPL7A; RPL29; TRAF6; RPL24; TUBA1A; RPL26; RPL21; RPS2; RPS26P25; HSPD1; HNRNPK; CSNK2A1; EEF1A1; MYC; HNRNPC; RPS19; BRCA1; RPS27A; RPS23; RPS20; PABPC1; SLC25A6; PARP1; RPL14; RPL10; RPS15A; RPL12; RPL13; RPS4X; HSPA8; MDM2; PRKDC; RPL18; CSNK2A2; RPL11; UBE2…	4193; 6133; 6144; 6130; 6201; 4087; 293; 6210; 409; 6157; 6154; 6125; 7314; 1974; 3921; 6233; 3309; 6223; 8517; 672; 408; 6191; 6135; 7316; 6203; 7846; 4088; 6222; 324; 142; 6207; 6159; 4609; 6137; 6134; 6205; 728937; 6202; 6224; 6217; 1457; 983; 6136; 6129; 7311; 6194; 7189; 6187; 7157; 5111; 1915; 6160; 9349; 9045; 6128; 9972; 6189; 3312; 1459; 60; 6141; 6152; 5591; 6188; 3329; 6228; 3190; 3183…	2008	1999
8.30297e-17	2.87935e-15	Disease	Reactome	R-HSA-1643685	TSG101; SSRP1; JUN; HRAS; RPS27A; EGFR; SMAD2; SMAD3; CTNNB1; AKT1; ARRB2; CLTC; ARRB1; XRCC6; FYN; MAPK1; PIK3R1; MYC; SRC; VCL; SLC25A6; SLC25A5; POLR2A; MDM2; NPM1; SNW1; ESR1; PHB; NUP153; UBA52; GRB2; UBB; UBC; HSP90AA1; LCK	207; 9972; 4193; 408; 6714; 22938; 2885; 4087; 7316; 1499; 293; 5430; 3265; 2534; 4088; 3932; 5245; 7311; 3320; 409; 1213; 3725; 7414; 7251; 7314; 6749; 4609; 6233; 1956; 2547; 5594; 292; 5295; 2099; 4869	509	507
5.59532e-15	1.81163e-13	Epstein-Barr virus infection - Homo sapiens (human)	KEGG	path:hsa05169	HSPA8; AKT1; IKBKG; YWHAZ; JUN; CSNK2A2; PIK3R1; NFKB1; LYN; YWHAG; TRAF6; HSPB1; POLR2A; MDM2; MYC; CSNK2A1; SNW1; TP53; VIM; CDK1; CDK2; PRKACA	4609; 7189; 4193; 3725; 5295; 4790; 207; 3312; 3315; 7431; 4067; 5430; 8517; 1017; 7532; 7534; 22938; 1457; 1459; 5566; 983; 7157	203	199
5.59721e-15	1.81163e-13	Diseases of signal transduction	Reactome	R-HSA-5663202	HRAS; RPS27A; EGFR; SMAD2; SMAD3; AKT1; ARRB2; ARRB1; FYN; MAPK1; PIK3R1; MYC; SRC; VCL; MDM2; SNW1; ESR1; PHB; UBA52; GRB2; UBB; UBC; HSP90AA1; LCK	4088; 3265; 2534; 1956; 5594; 4193; 6714; 5295; 2099; 3932; 5245; 2885; 7311; 7414; 207; 7314; 22938; 3320; 409; 4087; 7316; 408; 4609; 6233	247	247
2.90005e-14	9.08372e-13	Signaling by ERBB2	Reactome	R-HSA-1227986	SRC; UBB; PRKCA; EGFR; HRAS; RPS27A; FYN; AKT1; UBA52; GRB2; PIK3R1; UBC; HSP90AA1	207; 5578; 6714; 3265; 2534; 3320; 1956; 2885; 7316; 7311; 5295; 7314; 6233	50	50
4.16642e-14	1.26425e-12	Intracellular signaling by second messengers	Reactome	R-HSA-9006925	MOV10; JUN; RPS27A; EGFR; AKT1; FYN; MAPK1; PIK3R1; SRC; TRAF6; PRKCA; TRIM27; MDM2; CSNK2A2; CSNK2A1; TP53; ESR1; UBA52; GRB2; PRKACA; UBB; UBC; LCK	3725; 5578; 2534; 1956; 1457; 5594; 4193; 5987; 7157; 3932; 7314; 6714; 5566; 4343; 5295; 2099; 2885; 7311; 1459; 207; 7316; 7189; 6233	244	244
2.26158e-13	6.65454e-12	Hepatitis B - Homo sapiens (human)	KEGG	path:hsa05161	YWHAZ; SRC; DDX3X; TP53; PRKCA; HRAS; JUN; SMAD3; AKT1; CDK2; GRB2; PCNA; IKBKG; PIK3R1; IKBKE; NFKB1; MYC; MAPK1	4609; 1654; 6714; 3725; 5295; 4790; 3265; 207; 8517; 7534; 2885; 9641; 5578; 4088; 1017; 5594; 7157; 5111	144	144
2.39206e-13	6.83143e-12	PIP3 activates AKT signaling	Reactome	R-HSA-1257604	SRC; RPS27A; TP53; PIK3R1; TRAF6; ESR1; EGFR; TRIM27; FYN; JUN; GRB2; AKT1; UBA52; MAPK1; UBB; UBC; MOV10; MDM2; CSNK2A2; LCK; CSNK2A1	3725; 2534; 1956; 1457; 5594; 4193; 5987; 7157; 3932; 7314; 6714; 4343; 5295; 2099; 2885; 7311; 1459; 207; 7189; 7316; 6233	213	213
2.76152e-13	7.66124e-12	Signaling by FGFR2	Reactome	R-HSA-5654738	SRC; RPS27A; UBB; HRAS; HNRNPA1; MAPK1; UBA52; GRB2; POLR2A; HNRNPM; PIK3R1; UBC; HNRNPH1; HNRNPF	5430; 6714; 3187; 2885; 3178; 7316; 7311; 5594; 4670; 5295; 3265; 7314; 6233; 3185	73	73
7.77627e-13	2.09743e-11	Viral carcinogenesis - Homo sapiens (human)	KEGG	path:hsa05203	YWHAZ; SRC; SNW1; DDX3X; TP53; GRB2; HRAS; JUN; CDK1; CDK2; HNRNPK; PRKACA; IKBKG; PIK3R1; NFKB1; MDM2; LYN; YWHAG; MAPK1; GSN	6714; 4193; 1654; 5295; 4790; 3265; 3190; 983; 2885; 3725; 7532; 7534; 2934; 22938; 8517; 5566; 5594; 4067; 7157; 1017	201	201
2.63096e-12	6.9045e-11	Signaling by Receptor Tyrosine Kinases	Reactome	R-HSA-9006934	HRAS; RPS27A; EGFR; CTNNB1; AKT1; HNRNPH1; CLTC; FYN; MAPK1; HNRNPM; PIK3R1; LYN; HNRNPF; SRC; PRKCA; HNRNPA1; POLR2A; RASA1; NCK1; ESR1; UBA52; GRB2; PRKACA; UBB; UBC; HSP90AA1; LCK	5578; 2885; 7316; 1499; 5430; 3265; 2534; 3185; 5921; 4690; 3932; 7311; 3320; 3187; 1213; 6714; 3178; 7314; 207; 6233; 4067; 1956; 4670; 5594; 5566; 5295; 2099	422	422
3.47206e-12	8.87202e-11	Signaling by FGFR	Reactome	R-HSA-190236	SRC; RPS27A; UBB; GRB2; HRAS; HNRNPA1; UBA52; MAPK1; POLR2A; HNRNPM; PIK3R1; UBC; HNRNPH1; HNRNPF	3185; 5430; 3265; 4670; 5594; 6714; 5295; 7314; 2885; 3178; 7311; 3187; 7316; 6233	87	87
1.31752e-11	3.28028e-10	MAPK family signaling cascades	Reactome	R-HSA-5683057	SRC; MYC; HSPB1; FYN; HRAS; UBC; JUN; PHB; VCL; CDK1; UBA52; GRB2; PRKACA; UBB; ARRB1; ARRB2; EGFR; RPS27A; RASA1; MAPK1	3725; 409; 983; 408; 6714; 5566; 3265; 2534; 5245; 1956; 5921; 3315; 2885; 7311; 7414; 4609; 7314; 5594; 7316; 6233	235	234
1.61115e-11	3.90107e-10	Prostate cancer - Homo sapiens (human)	KEGG	path:hsa05215	CTNNB1; TP53; HRAS; EGFR; HSP90AB1; AKT1; CDK2; GRB2; IKBKG; PIK3R1; HSP90AA1; NFKB1; MDM2; MAPK1	4193; 5295; 4790; 3265; 207; 3326; 2885; 8517; 1956; 3320; 5594; 1499; 7157; 1017	97	97
1.64721e-11	3.90107e-10	Axon guidance	Reactome	R-HSA-422475	MYH10; HRAS; RPS27A; EGFR; CLTC; ABL1; FYN; CSNK2A2; HSP90AB1; MAPK1; LYN; SRC; HSPA8; PRKCA; RASA1; CSNK2A1; NCK1; UBA52; GRB2; PRKACA; UBB; UBC; HSP90AA1; ACTB	4690; 5578; 1457; 6714; 2885; 1459; 7316; 3265; 2534; 3326; 5921; 60; 7311; 3312; 25; 7314; 6233; 4067; 3320; 1956; 4628; 5594; 5566; 1213	357	356
2.63297e-11	6.08717e-10	Ovarian tumor domain proteases	Reactome	R-HSA-5689896	TP53; TRAF6; ESR1; RPS27A; CDK1; UBA52; IKBKG; UBB; UBC; APC	7157; 983; 7189; 2099; 8517; 7316; 7311; 324; 7314; 6233	38	38
2.75148e-11	6.21322e-10	Transcriptional regulation by RUNX3	Reactome	R-HSA-8878159	SRC; SNW1; TP53; RPS27A; SMAD3; CTNNB1; UBA52; UBB; UBC; MDM2; MYC	7157; 22938; 7311; 6714; 4088; 7316; 4193; 4609; 7314; 6233; 1499	52	51
4.81709e-11	1.06304e-09	Colorectal cancer - Homo sapiens (human)	KEGG	path:hsa05210	TP53; EGFR; HRAS; JUN; SMAD2; SMAD3; CTNNB1; AKT1; GRB2; PIK3R1; APC; MYC; MAPK1	4609; 3725; 5295; 3265; 207; 1499; 2885; 324; 1956; 5594; 7157; 4087; 4088	86	86
5.93029e-11	1.27963e-09	Gene expression (Transcription)	Reactome	R-HSA-74160	PCNA; MOV10; SSRP1; RPS27A; EGFR; SMAD2; SMAD3; CTNNB1; AKT1; ABL1; NUDT21; SMARCA4; YWHAZ; SRSF1; SRSF2; U2AF1; U2AF2; JUN; UBA52; HSPD1; MAPK1; SP1; MYC; YWHAG; BRCA1; SRC; NR3C1; SF3B1; MYBBP1A; PARP1; PRMT5; POLR2A; MDM2; NPM1; CSNK2A2; CSNK2A1; UBE2I; SNW1; TP53; ESR1; NUP153; CDK1; CDK2; UBB; UBC; ACTB; EIF4A3	207; 4193; 11338; 4087; 7314; 7307; 6233; 1956; 7532; 672; 6714; 22938; 7316; 1017; 5430; 4088; 142; 10514; 6749; 4609; 5594; 7534; 1457; 10419; 6597; 983; 7311; 6427; 3725; 7157; 7329; 25; 5111; 9775; 6426; 9972; 4869; 1459; 23451; 2099; 1499; 6667; 11051; 60; 3329; 4343; 2908	1372	1363
6.86011e-11	1.44808e-09	Proteoglycans in cancer - Homo sapiens (human)	KEGG	path:hsa05205	SRC; MDM2; TP53; DDX5; PRKCA; HRAS; ESR1; EGFR; SMAD2; CTNNB1; RPS6; GRB2; AKT1; PIK3R1; PRKACA; MYC; ACTB; MAPK1	4609; 6194; 6714; 60; 1655; 5295; 3265; 207; 1499; 2099; 2885; 1956; 5566; 7157; 5578; 5594; 4193; 4087	201	201
7.94768e-11	1.64196e-09	Relaxin signaling pathway - Homo sapiens (human)	KEGG	path:hsa04926	SRC; PRKCA; EGFR; HRAS; JUN; SMAD2; SMAD3; AKT1; GRB2; ARRB2; PIK3R1; ARRB1; NFKB1; MAPK1; PRKACA	6714; 5295; 4790; 3265; 207; 2885; 3725; 408; 409; 1956; 5566; 5578; 5594; 4087; 4088	130	130
1.38754e-10	2.80689e-09	Oncogene Induced Senescence	Reactome	R-HSA-2559585	TP53; SP1; RPS27A; UBA52; MAPK1; UBB; UBC; MOV10; MDM2	7157; 5594; 6667; 4343; 7316; 7311; 4193; 7314; 6233	32	32
1.62224e-10	3.21469e-09	Chronic myeloid leukemia - Homo sapiens (human)	KEGG	path:hsa05220	TP53; HRAS; SMAD3; AKT1; GRB2; IKBKG; PIK3R1; ABL1; NFKB1; MYC; MDM2; MAPK1	4609; 25; 2885; 5295; 4790; 3265; 8517; 207; 4088; 5594; 4193; 7157	76	76
2.94927e-10	5.72748e-09	spliceosomal assembly	BioCarta	smpathway	SNRPB2; SRSF2; U2AF1; U2AF2; SNRPA; SNRNP70	6625; 6427; 6629; 11338; 7307; 6626	9	9
3.06098e-10	5.82786e-09	RNA Polymerase II Transcription	Reactome	R-HSA-73857	BRCA1; MOV10; SSRP1; RPS27A; EGFR; SMAD2; SMAD3; CTNNB1; AKT1; ABL1; NUDT21; SMARCA4; YWHAZ; SRSF1; SRSF2; U2AF1; U2AF2; JUN; CDK2; HSPD1; MAPK1; MYC; YWHAG; PCNA; SRC; NR3C1; SP1; PARP1; PRMT5; POLR2A; MDM2; NPM1; CSNK2A2; CSNK2A1; UBE2I; SNW1; TP53; ESR1; CDK1; UBA52; UBB; UBC; EIF4A3	6426; 207; 1457; 4193; 10419; 4869; 6714; 6597; 22938; 1459; 11338; 7316; 983; 6667; 4087; 11051; 7311; 6427; 5430; 142; 3725; 7157; 1017; 7329; 25; 3329; 7314; 6749; 4088; 2099; 1499; 7307; 5111; 672; 4609; 6233; 1956; 5594; 7532; 2908; 9775; 7534; 4343	1235	1227
3.32577e-10	6.21023e-09	Cell Cycle	Reactome	R-HSA-1640170	BRCA1; RPS27A; AKT1; ABL1; YWHAZ; TUBA1A; UBA52; CSNK2A2; HSP90AB1; MAPK1; LYN; YWHAG; PCNA; SRC; PRKCA; MDM2; NPM1; MYC; CSNK2A1; TP53; TUBB; NUP153; CDK1; CDK2; PRKACA; UBB; UBC; HSP90AA1	5578; 207; 9972; 1457; 4869; 6714; 1459; 7316; 983; 7846; 3326; 7311; 3320; 1017; 7157; 25; 7314; 5111; 672; 4609; 6233; 4067; 5594; 7532; 5566; 4193; 7534; 203068	561	560
4.39674e-10	8.02176e-09	Signaling by Interleukins	Reactome	R-HSA-449147	YWHAZ; DHX9; UBB; TRAF6; GRB2; RPS27A; FYN; JUN; SMAD3; UBA52; MAPK1; PRKACA; IKBKG; PIK3R1; UBC; NFKB1; LYN; SMARCA4; LCK	4067; 2885; 5594; 4790; 4088; 5566; 6597; 5295; 2534; 3932; 8517; 7311; 7314; 7189; 1660; 7316; 7534; 6233; 3725	254	254
4.46112e-10	8.02176e-09	Regulation of TP53 Degradation	Reactome	R-HSA-6804757	TP53; CDK1; RPS27A; UBA52; AKT1; CDK2; UBB; UBC; MDM2	7157; 207; 1017; 983; 7316; 7311; 4193; 7314; 6233	36	36
4.77266e-10	8.27546e-09	Regulation of PTEN stability and activity	Reactome	R-HSA-8948751	RPS27A; TRIM27; AKT1; UBA52; UBB; UBC; CSNK2A2; CSNK2A1	5987; 207; 7311; 1457; 7316; 7314; 6233; 1459	25	25
4.77266e-10	8.27546e-09	SMAD2/SMAD3:SMAD4 heterotrimer regulates transcription	Reactome	R-HSA-2173796	SNW1; SP1; RPS27A; SMAD2; SMAD3; UBA52; UBB; UBC	22938; 7311; 4088; 6667; 4087; 7316; 7314; 6233	25	25
5.83202e-10	9.93489e-09	Regulation of TP53 Expression and Degradation	Reactome	R-HSA-6806003	TP53; CDK1; RPS27A; UBA52; AKT1; CDK2; UBB; UBC; MDM2	7157; 207; 1017; 983; 7316; 7311; 4193; 7314; 6233	37	37
6.18507e-10	1.02715e-08	Cytosolic sensors of pathogen-associated DNA	Reactome	R-HSA-1834949	DHX9; RPS27A; PRKDC; CTNNB1; UBA52; IKBKG; UBB; UBC; NFKB1; XRCC6	5591; 1499; 2547; 8517; 4790; 1660; 7316; 7311; 7314; 6233	51	51
6.2412e-10	1.02715e-08	ErbB signaling pathway - Homo sapiens (human)	KEGG	path:hsa04012	SRC; NCK1; PRKCA; JUN; HRAS; EGFR; AKT1; GRB2; PIK3R1; ABL1; MAPK1; MYC	4609; 3265; 3725; 2885; 25; 1956; 6714; 5578; 207; 4690; 5594; 5295	85	85
7.56024e-10	1.2235e-08	Transcriptional activity of SMAD2/SMAD3:SMAD4 heterotrimer	Reactome	R-HSA-2173793	SNW1; SP1; RPS27A; PARP1; SMAD2; SMAD3; UBA52; UBB; UBC	6667; 22938; 7311; 4088; 4087; 7316; 142; 7314; 6233	38	38
9.72322e-10	1.54775e-08	MAPK6/MAPK4 signaling	Reactome	R-HSA-5687128	HSPB1; RPS27A; JUN; CDK1; UBA52; PRKACA; UBB; UBC; MYC	3725; 7314; 983; 3315; 5566; 7316; 7311; 4609; 6233	39	39
1.12147e-09	1.72849e-08	Signaling by PTK6	Reactome	R-HSA-8848021	NR3C1; HRAS; RPS27A; EGFR; UBA52; AKT1; CDK2; UBB; UBC; RASA1	207; 5921; 1017; 3265; 1956; 7316; 7311; 2908; 7314; 6233	54	54
1.12147e-09	1.72849e-08	Signaling by Non-Receptor Tyrosine Kinases	Reactome	R-HSA-9006927	NR3C1; HRAS; RPS27A; EGFR; UBA52; AKT1; CDK2; UBB; UBC; RASA1	207; 5921; 1017; 3265; 1956; 7316; 7311; 2908; 7314; 6233	54	54
1.2412e-09	1.88313e-08	Signaling by FGFR3	Reactome	R-HSA-5654741	SRC; UBB; HRAS; RPS27A; UBA52; GRB2; PIK3R1; UBC; MAPK1	6714; 2885; 7316; 7311; 5594; 5295; 3265; 7314; 6233	40	40
1.35597e-09	2.02562e-08	Pathogenic Escherichia coli infection - Homo sapiens (human)	KEGG	path:hsa05130	YWHAZ; NCK1; PRKCA; TUBA1A; FYN; TUBB; CTNNB1; NCL; ABL1; ACTB	25; 1499; 7846; 203068; 5578; 60; 4690; 4691; 2534; 7534	55	55
1.39126e-09	2.04683e-08	Adherens junction - Homo sapiens (human)	KEGG	path:hsa04520	SRC; FYN; EGFR; SMAD2; SMAD3; CTNNB1; MAPK1; ACTB; CSNK2A2; CSNK2A1; VCL	4088; 5594; 6714; 1956; 1459; 1457; 60; 4087; 1499; 2534; 7414	72	72
1.57328e-09	2.28008e-08	Signaling by FGFR4	Reactome	R-HSA-5654743	SRC; UBB; HRAS; RPS27A; UBA52; GRB2; PIK3R1; UBC; MAPK1	6714; 2885; 7316; 7311; 5594; 5295; 3265; 7314; 6233	41	41
1.60544e-09	2.29247e-08	Estrogen signaling pathway - Homo sapiens (human)	KEGG	path:hsa04915	SRC; ESR1; SP1; HRAS; HSPA8; JUN; HSP90AB1; AKT1; GRB2; PRKACA; PIK3R1; HSP90AA1; EGFR; MAPK1	6667; 2099; 6714; 3725; 5295; 3265; 207; 3312; 3326; 2885; 1956; 5566; 3320; 5594	137	136
1.94918e-09	2.74297e-08	Regulation of TP53 Activity through Methylation	Reactome	R-HSA-6804760	TP53; RPS27A; PRMT5; UBA52; UBB; UBC; MDM2	7316; 7311; 4193; 7314; 6233; 10419; 7157	19	19
2.18283e-09	3.0095e-08	Transcriptional regulation by RUNX2	Reactome	R-HSA-8878166	SRC; NR3C1; ESR1; RPS27A; AKT1; UBA52; MAPK1; UBB; UBC; ABL1; CDK1	207; 2908; 983; 6714; 2099; 25; 7316; 7311; 5594; 7314; 6233	75	75
2.20056e-09	3.0095e-08	Thyroid hormone signaling pathway - Homo sapiens (human)	KEGG	path:hsa04919	SRC; TP53; ACTB; ESR1; PRKCA; HRAS; CTNNB1; AKT1; MAPK1; PRKACA; PIK3R1; MYC; MDM2	4609; 2099; 6714; 4193; 5295; 3265; 207; 1499; 60; 5566; 5578; 5594; 7157	116	116
2.342e-09	3.15845e-08	Endometrial cancer - Homo sapiens (human)	KEGG	path:hsa05213	TP53; HRAS; EGFR; CTNNB1; AKT1; GRB2; PIK3R1; APC; MYC; MAPK1	4609; 324; 1499; 1956; 5295; 3265; 2885; 207; 5594; 7157	58	58
2.47854e-09	3.29679e-08	Signaling by EGFR	Reactome	R-HSA-177929	SRC; UBB; HRAS; RPS27A; EGFR; UBA52; GRB2; PIK3R1; UBC	1956; 3265; 7316; 7311; 2885; 5295; 6714; 7314; 6233	43	43
2.56327e-09	3.36343e-08	Infectious disease	Reactome	R-HSA-5663205	TSG101; CTNNB1; CLTC; SSRP1; RPS27A; FYN; SLC25A6; SLC25A5; NUP153; UBA52; GRB2; POLR2A; UBB; UBC; HSP90AA1; NPM1; LCK; XRCC6	7251; 293; 9972; 292; 2534; 2547; 2885; 5430; 6749; 3932; 4869; 7311; 7314; 3320; 7316; 1213; 6233; 1499	253	251
2.63053e-09	3.40566e-08	PTEN Regulation	Reactome	R-HSA-6807070	RPS27A; TP53; TRIM27; JUN; AKT1; UBA52; MAPK1; UBB; UBC; MOV10; CSNK2A2; CSNK2A1	207; 3725; 1457; 5594; 5987; 7157; 7314; 4343; 7311; 1459; 7316; 6233	96	96
2.94598e-09	3.76388e-08	Developmental Biology	Reactome	R-HSA-1266738	MYH10; HRAS; HSPA8; EGFR; SMAD2; SMAD3; CTNNB1; AKT1; CLTC; ABL1; FYN; RASA1; HSP90AB1; MAPK1; LYN; SRC; RPS27A; PRKCA; CSNK2A2; CSNK2A1; NCK1; UBA52; GRB2; PRKACA; UBB; UBC; HSP90AA1; ACTB	207; 4690; 5578; 1457; 6714; 2885; 1459; 1499; 4087; 7316; 3265; 2534; 3326; 4088; 60; 7311; 3312; 3320; 1213; 4067; 25; 7314; 6233; 1956; 4628; 5594; 5921; 5566	618	617
3.00083e-09	3.78416e-08	Hepatocellular carcinoma - Homo sapiens (human)	KEGG	path:hsa05225	TP53; PRKCA; HRAS; EGFR; SMAD2; SMAD3; CTNNB1; AKT1; GRB2; PIK3R1; APC; MYC; SMARCA4; ACTB; MAPK1	4609; 5295; 3265; 207; 60; 1499; 324; 2885; 1956; 6597; 5578; 5594; 7157; 4087; 4088	168	168
3.08257e-09	3.8374e-08	Signaling by ERBB4	Reactome	R-HSA-1236394	UBB; ESR1; HRAS; RPS27A; EGFR; UBA52; GRB2; PIK3R1; UBC	3265; 1956; 2885; 7316; 7311; 5295; 7314; 6233; 2099	44	44
3.14416e-09	3.86453e-08	Stabilization of p53	Reactome	R-HSA-69541	TP53; RPS27A; UBA52; UBB; UBC; MDM2	7316; 7157; 7311; 4193; 7314; 6233	12	12
4.32946e-09	5.15201e-08	MAPK1/MAPK3 signaling	Reactome	R-HSA-5684996	SRC; RPS27A; PHB; HRAS; UBC; FYN; GRB2; VCL; CDK1; UBA52; MAPK1; ARRB2; UBB; ARRB1; EGFR; RASA1	409; 983; 408; 5594; 6714; 3265; 2534; 5245; 1956; 5921; 2885; 7311; 7414; 7314; 7316; 6233	201	200
4.40388e-09	5.15201e-08	Downregulation of SMAD2/3:SMAD4 transcriptional activity	Reactome	R-HSA-2173795	RPS27A; PARP1; SMAD2; SMAD3; UBA52; UBB; UBC	7316; 142; 7311; 4088; 7314; 6233; 4087	21	21
4.40388e-09	5.15201e-08	p53-Dependent G1 DNA Damage Response	Reactome	R-HSA-69563	TP53; RPS27A; CDK2; UBA52; UBB; UBC; MDM2	7316; 7157; 7311; 4193; 7314; 6233; 1017	21	21
4.40388e-09	5.15201e-08	p53-Dependent G1/S DNA damage checkpoint	Reactome	R-HSA-69580	TP53; RPS27A; CDK2; UBA52; UBB; UBC; MDM2	7316; 7157; 7311; 4193; 7314; 6233; 1017	21	21
4.46683e-09	5.16344e-08	Breast cancer - Homo sapiens (human)	KEGG	path:hsa05224	BRCA1; TP53; ESR1; SP1; HRAS; JUN; CTNNB1; AKT1; GRB2; PIK3R1; APC; MYC; MAPK1; EGFR	4609; 6667; 2099; 3725; 5295; 3265; 207; 1499; 324; 2885; 1956; 672; 5594; 7157	147	147
5.62478e-09	6.42549e-08	role of egf receptor transactivation by gpcrs in cardiac hypertrophy	BioCarta	cardiacegfpathway	PRKCA; JUN; HRAS; EGFR; GRB2; IKBKG; MAPK1; MYC	3725; 5578; 2885; 3265; 1956; 8517; 5594; 4609	33	33
5.77852e-09	6.44936e-08	NF-kB is activated and signals survival	Reactome	R-HSA-209560	TRAF6; RPS27A; UBA52; UBB; UBC; NFKB1	7316; 7189; 7311; 7314; 6233; 4790	13	13
5.77852e-09	6.44936e-08	Regulation of RUNX3 expression and activity	Reactome	R-HSA-8941858	SRC; RPS27A; UBA52; UBB; UBC; MDM2	7316; 7311; 6714; 4193; 7314; 6233	13	13
6.10894e-09	6.74065e-08	Autodegradation of the E3 ubiquitin ligase COP1	Reactome	R-HSA-349425	UBA52; RPS27A; TP53; UBB; UBC	7316; 7157; 7311; 7314; 6233	7	7
6.55176e-09	7.14804e-08	Cell Cycle, Mitotic	Reactome	R-HSA-69278	RPS27A; AKT1; ABL1; TUBA1A; CDK2; CSNK2A2; HSP90AB1; MAPK1; LYN; YWHAG; PCNA; SRC; PRKCA; MYC; CSNK2A1; TP53; TUBB; NUP153; CDK1; UBA52; PRKACA; UBB; UBC; HSP90AA1	5578; 207; 1457; 6714; 9972; 1459; 7316; 1017; 983; 7846; 3326; 7311; 3320; 7157; 25; 7314; 5111; 4609; 6233; 4067; 5594; 7532; 5566; 203068	479	478
6.67525e-09	7.20186e-08	Mitotic G1-G1/S phases	Reactome	R-HSA-453279	PCNA; SRC; CDK1; RPS27A; UBA52; AKT1; CDK2; UBB; UBC; ABL1; LYN; MYC	4067; 207; 983; 1017; 6714; 25; 7311; 7314; 5111; 7316; 4609; 6233	104	104
7.56727e-09	8.07452e-08	Transcriptional Regulation by TP53	Reactome	R-HSA-3700989	PCNA; BRCA1; YWHAZ; TP53; CDK1; SSRP1; YWHAG; RPS27A; JUN; CDK2; PRMT5; AKT1; UBA52; POLR2A; UBB; UBC; MOV10; MDM2; NPM1; CSNK2A2; CSNK2A1	207; 1457; 4193; 10419; 1459; 7316; 5430; 983; 7311; 3725; 1017; 7157; 7314; 6749; 5111; 6233; 7532; 4343; 4869; 672; 7534	373	370
9.09041e-09	9.59433e-08	G1/S DNA Damage Checkpoints	Reactome	R-HSA-69615	TP53; RPS27A; UBA52; CDK2; UBB; UBC; MDM2	7157; 1017; 7316; 7311; 4193; 7314; 6233	23	23
9.24253e-09	9.65e-08	Pathways in cancer - Homo sapiens (human)	KEGG	path:hsa05200	HRAS; EGFR; SMAD2; SMAD3; CTNNB1; AKT1; IKBKG; ABL1; JUN; HSP90AB1; MAPK1; PIK3R1; NFKB1; MYC; TRAF6; PRKCA; SP1; APC; MDM2; TP53; ESR1; CDK2; GRB2; PRKACA; HSP90AA1	25; 2099; 4193; 324; 8517; 4609; 6667; 4790; 1499; 2885; 7157; 1017; 7189; 5295; 3265; 207; 3320; 5566; 5578; 5594; 3326; 3725; 1956; 4087; 4088	526	526
1.00074e-08	1.03375e-07	Spry regulation of FGF signaling	Reactome	R-HSA-1295596	SRC; RPS27A; UBA52; GRB2; UBB; UBC	7316; 7311; 6714; 7314; 6233; 2885	14	14
1.02139e-08	1.04397e-07	Signaling by FGFR1	Reactome	R-HSA-5654736	SRC; UBB; HRAS; RPS27A; UBA52; GRB2; PIK3R1; UBC; MAPK1	6714; 2885; 7316; 7311; 5594; 5295; 3265; 7314; 6233	50	50
1.1836e-08	1.19716e-07	Cellular responses to stress	Reactome	R-HSA-2262752	EEF1A1; HSP90AB1; NR3C1; RPS27A; TP53; HSPA5; HSPB1; SP1; HSPA8; JUN; UBA52; NUP153; MAPK1; CDK2; NFKB1; UBB; UBC; HSP90AA1; MDM2; MOV10	9972; 4193; 3312; 7316; 1017; 6667; 3326; 2908; 7311; 3320; 3725; 7157; 4790; 3315; 7314; 1915; 6233; 5594; 3309; 4343	345	344
1.26984e-08	1.27115e-07	tumor suppressor arf inhibits ribosomal biogenesis	BioCarta	arfpathway	TP53; AKT1; PIK3R1; ABL1; HSP90AA1; MDM2; MYC	7157; 207; 3320; 25; 4193; 5295; 4609	24	24
1.34063e-08	1.32832e-07	Cellular senescence - Homo sapiens (human)	KEGG	path:hsa04218	TP53; CDK1; HRAS; SLC25A6; SLC25A5; SMAD3; AKT1; CDK2; MAPK1; SMAD2; PIK3R1; NFKB1; MYC; MDM2	4609; 4193; 293; 5295; 4790; 3265; 207; 292; 983; 5594; 7157; 4087; 4088; 1017	160	160
1.45249e-08	1.42462e-07	Regulation of TP53 Activity	Reactome	R-HSA-5633007	BRCA1; TP53; CDK1; SSRP1; RPS27A; UBA52; PRMT5; AKT1; CDK2; UBB; UBC; MDM2; CSNK2A2; CSNK2A1	207; 983; 1457; 4193; 1017; 10419; 7157; 7311; 7314; 1459; 6749; 672; 7316; 6233	161	161
1.46796e-08	1.42539e-07	mRNA Splicing - Minor Pathway	Reactome	R-HSA-72165	SNRNP200; SRSF1; SRSF2; SF3B1; LSM2; SF3B2; POLR2A; SF3B3; YBX1	23450; 10992; 5430; 6427; 6426; 57819; 23020; 4904; 23451	52	52
1.49869e-08	1.44082e-07	trefoil factors initiate mucosal healing	BioCarta	tffpathway	HRAS; EGFR; CTNNB1; AKT1; GRB2; IKBKG; PIK3R1; MAPK1	207; 2885; 3265; 1956; 8517; 5594; 5295; 1499	37	37
1.57822e-08	1.5024e-07	Metabolism	Reactome	R-HSA-1430728	RPS13; RPS11; RPS16; RPL8; RPL9; RPL6; RPL7; RPL27A; RPS18; GAPDH; RPS15A; RPS7; AKT1; RPS27A; RPS2; RPS3; RPS9; RPS8; RPS26P25; RPL7A; RPL29; RPL24; RPL26; RPL21; RPL23; HSP90AB1; PIK3R1; RPS3A; RPS19; RPL5; RPS23; RPS20; PRKCA; SP1; SLC25A6; SLC25A5; RPL14; RPL10; RPL11; RPL12; RPL13; RPS4X; RPL18; CSNK2A2; CSNK2A1; UBE2I; RPSA; RPS6; RPL31; NUP153; UBA52; PRKACA; HSP90AA1	207; 6133; 6144; 6130; 6201; 6191; 293; 6210; 6157; 6154; 6132; 6125; 3921; 6233; 6223; 292; 2597; 6135; 6203; 3326; 6222; 6137; 6134; 6205; 728937; 6202; 6224; 6217; 1457; 6159; 6136; 6129; 7311; 6194; 3320; 6187; 7329; 5566; 9349; 9045; 6128; 6207; 5578; 9972; 6189; 6667; 1459; 6141; 6152; 6188; 6228; 6160; 5295	1966	1954
1.61249e-08	1.52013e-07	InlA-mediated entry of Listeria monocytogenes into host cells	Reactome	R-HSA-8876493	CTNNB1; UBA52; RPS27A; UBB; UBC	7316; 7311; 1499; 7314; 6233	8	8
1.65059e-08	1.54108e-07	telomeres telomerase cellular aging and immortality	BioCarta	telpathway	TP53; PRKCA; AKT1; POLR2A; MYC; XRCC6	207; 4609; 2547; 7157; 5578; 5430	15	15
1.70266e-08	1.57455e-07	G2/M Transition	Reactome	R-HSA-69275	TP53; TUBA1A; RPS27A; UBA52; TUBB; HSP90AB1; CDK1; CDK2; PRKACA; UBB; UBC; HSP90AA1; YWHAG	1017; 983; 7846; 3326; 7157; 5566; 7532; 7314; 6233; 7311; 3320; 7316; 203068	137	137
1.74511e-08	1.59859e-07	tpo signaling pathway	BioCarta	tpopathway	PRKCA; HRAS; JUN; GRB2; PIK3R1; RASA1; CSNK2A1	5921; 3725; 5578; 3265; 2885; 1457; 5295	25	25
1.99315e-08	1.80874e-07	VEGFA-VEGFR2 Pathway	Reactome	R-HSA-4420097	SRC; NCK1; PRKCA; HRAS; FYN; CTNNB1; AKT1; PRKACA; PIK3R1; HSP90AA1; RASA1	207; 3320; 5578; 3265; 2534; 5921; 6714; 4690; 5566; 5295; 1499	92	92
2.02923e-08	1.82443e-07	Mitotic G2-G2/M phases	Reactome	R-HSA-453274	TP53; TUBA1A; RPS27A; UBA52; TUBB; HSP90AB1; CDK1; CDK2; PRKACA; UBB; UBC; HSP90AA1; YWHAG	1017; 983; 7846; 3326; 7157; 5566; 7532; 7314; 6233; 7311; 3320; 7316; 203068	139	139
2.09925e-08	1.87006e-07	Generic Transcription Pathway	Reactome	R-HSA-212436	BRCA1; MOV10; SSRP1; RPS27A; EGFR; SMAD2; SMAD3; CTNNB1; AKT1; ABL1; SMARCA4; YWHAZ; JUN; UBA52; HSPD1; MAPK1; MYC; YWHAG; PCNA; SRC; NR3C1; SP1; PARP1; PRMT5; POLR2A; MDM2; NPM1; CSNK2A2; CSNK2A1; UBE2I; SNW1; TP53; ESR1; CDK1; CDK2; UBB; UBC	207; 1457; 4193; 10419; 4869; 6714; 6597; 22938; 5430; 1459; 1499; 7316; 983; 6667; 4087; 7311; 3725; 4343; 1017; 7157; 7329; 25; 3329; 7314; 6749; 4088; 2099; 5111; 672; 4609; 6233; 1956; 5594; 7532; 2908; 142; 7534	1106	1098
2.14229e-08	1.89106e-07	RAF/MAP kinase cascade	Reactome	R-HSA-5673001	ARRB1; SRC; RPS27A; EGFR; HRAS; UBC; FYN; GRB2; VCL; UBA52; MAPK1; ARRB2; UBB; PHB; RASA1	409; 1956; 5594; 6714; 3265; 2534; 5245; 5921; 2885; 7311; 7414; 7314; 7316; 408; 6233	195	194
2.16841e-08	1.89687e-07	HTLV-I infection - Homo sapiens (human)	KEGG	path:hsa05166	PCNA; TP53; HRAS; JUN; SLC25A6; SLC25A5; SMAD3; CTNNB1; AKT1; SMAD2; PRKACA; IKBKG; PIK3R1; APC; NFKB1; MYC; LCK	4609; 5295; 5566; 3725; 4790; 3265; 207; 292; 293; 324; 8517; 3932; 4087; 7157; 1499; 4088; 5111	255	255
2.23621e-08	1.93872e-07	Regulation of TP53 Activity through Phosphorylation	Reactome	R-HSA-6804756	BRCA1; TP53; SSRP1; RPS27A; UBA52; CDK2; UBB; UBC; MDM2; CSNK2A2; CSNK2A1	1017; 1457; 4193; 7157; 7311; 7314; 1459; 6749; 672; 7316; 6233	93	93
2.61353e-08	2.20673e-07	Regulation of KIT signaling	Reactome	R-HSA-1433559	SRC; PRKCA; FYN; GRB2; LYN; LCK	4067; 6714; 2534; 2885; 5578; 3932	16	16
2.61353e-08	2.20673e-07	p75NTR signals via NF-kB	Reactome	R-HSA-193639	TRAF6; RPS27A; UBA52; UBB; UBC; NFKB1	7316; 7189; 7311; 6233; 7314; 4790	16	16
2.61353e-08	2.20673e-07	MAP3K8 (TPL2)-dependent MAPK1/3 activation	Reactome	R-HSA-5684264	RPS27A; UBA52; IKBKG; UBB; UBC; NFKB1	7316; 7311; 7314; 6233; 8517; 4790	16	16
3.11488e-08	2.60737e-07	Signaling by NOTCH	Reactome	R-HSA-157118	SNW1; MOV10; UBC; RPS27A; EGFR; UBA52; ARRB2; UBB; ARRB1; TP53; MYC; YBX1	1956; 4904; 408; 7157; 7314; 4343; 7311; 4609; 22938; 6233; 409; 7316	120	119
3.15638e-08	2.61952e-07	pdgf signaling pathway	BioCarta	pdgfpathway	PRKCA; HRAS; JUN; GRB2; PIK3R1; RASA1; CSNK2A1	5921; 3725; 5578; 3265; 2885; 1457; 5295	27	27
3.21209e-08	2.64317e-07	MAPK signaling pathway - Homo sapiens (human)	KEGG	path:hsa04010	TP53; TRAF6; HSPB1; PRKCA; EGFR; HRAS; HSPA8; JUN; AKT1; GRB2; ARRB2; IKBKG; ARRB1; NFKB1; MYC; RASA1; MAPK1; PRKACA	409; 4609; 7189; 3725; 4790; 3265; 3312; 3315; 5921; 2885; 408; 207; 1956; 5566; 8517; 5578; 5594; 7157	295	295
3.38338e-08	2.76072e-07	Deubiquitination	Reactome	R-HSA-5688426	ARRB1; BRCA1; TP53; ACTB; TRAF6; ESR1; RPS27A; SMAD2; SMAD3; CDK1; UBA52; ARRB2; IKBKG; UBB; UBC; APC; MYC; MDM2	983; 408; 7316; 7157; 7314; 6233; 4088; 8517; 4609; 7311; 7189; 672; 2099; 4193; 409; 4087; 324; 60	296	296
3.49422e-08	2.82741e-07	Toll Like Receptor 3 (TLR3) Cascade	Reactome	R-HSA-168164	DHX9; RPS27A; TRAF6; UBC; JUN; UBA52; MAPK1; IKBKG; UBB; IKBKE; NFKB1	3725; 5594; 4790; 9641; 8517; 7311; 7314; 7189; 1660; 7316; 6233	97	97
3.59124e-08	2.8819e-07	PTK6 Regulates RTKs and Their Effectors AKT1 and DOK1	Reactome	R-HSA-8849469	AKT1; UBA52; RPS27A; UBB; UBC	7316; 207; 7314; 6233; 7311	9	9
4.16423e-08	3.31432e-07	role of erbb2 in signal transduction and oncology	BioCarta	her2pathway	ESR1; HRAS; EGFR; AKT1; GRB2; PIK3R1; MAPK1	207; 3265; 1956; 2885; 5594; 5295; 2099	28	28
4.67608e-08	3.69144e-07	Gastric cancer - Homo sapiens (human)	KEGG	path:hsa05226	TP53; HRAS; EGFR; SMAD2; SMAD3; CTNNB1; AKT1; CDK2; GRB2; PIK3R1; APC; MYC; MAPK1	4609; 5295; 3265; 207; 324; 4087; 2885; 1956; 5594; 1499; 7157; 4088; 1017	149	149
4.81653e-08	3.77165e-07	Signaling by VEGF	Reactome	R-HSA-194138	SRC; NCK1; PRKCA; HRAS; FYN; CTNNB1; AKT1; PRKACA; PIK3R1; HSP90AA1; RASA1	207; 3320; 5578; 3265; 2534; 5921; 6714; 4690; 5566; 5295; 1499	100	100
4.95222e-08	3.84689e-07	Cell cycle - Homo sapiens (human)	KEGG	path:hsa04110	YWHAZ; PCNA; TP53; SMAD2; YWHAG; PRKDC; CDK1; CDK2; ABL1; MYC; SMAD3; MDM2	4609; 25; 4193; 7532; 7534; 5111; 7157; 4087; 4088; 983; 5591; 1017	124	124
5.27974e-08	3.99542e-07	Signaling by SCF-KIT	Reactome	R-HSA-1433557	SRC; PRKCA; HRAS; FYN; GRB2; PIK3R1; LYN; LCK	4067; 5578; 3932; 2534; 6714; 2885; 5295; 3265	43	43
5.3471e-08	3.99542e-07	TRIF(TICAM1)-mediated TLR4 signaling	Reactome	R-HSA-937061	DHX9; RPS27A; TRAF6; UBC; JUN; UBA52; MAPK1; IKBKG; UBB; IKBKE; NFKB1	3725; 5594; 4790; 9641; 8517; 7311; 7314; 7189; 1660; 7316; 6233	101	101
5.3471e-08	3.99542e-07	MyD88-independent TLR4 cascade	Reactome	R-HSA-166166	DHX9; RPS27A; TRAF6; UBC; JUN; UBA52; MAPK1; IKBKG; UBB; IKBKE; NFKB1	3725; 5594; 4790; 9641; 8517; 7311; 7314; 7189; 1660; 7316; 6233	101	101
5.3471e-08	3.99542e-07	T cell receptor signaling pathway - Homo sapiens (human)	KEGG	path:hsa04660	NCK1; FYN; HRAS; JUN; AKT1; GRB2; IKBKG; PIK3R1; NFKB1; LCK; MAPK1	4690; 2885; 3725; 5295; 4790; 3265; 207; 8517; 3932; 2534; 5594	101	101
5.43147e-08	3.99542e-07	Downregulation of ERBB2 signaling	Reactome	R-HSA-8863795	RPS27A; EGFR; AKT1; UBA52; UBB; UBC; HSP90AA1	207; 3320; 1956; 7316; 7311; 7314; 6233	29	29
5.43147e-08	3.99542e-07	Cyclin E associated events during G1/S transition	Reactome	R-HSA-69202	RPS27A; CDK2; AKT1; UBA52; UBB; UBC; MYC	207; 7316; 7311; 1017; 4609; 7314; 6233	29	29
5.43147e-08	3.99542e-07	Negative regulation of FGFR3 signaling	Reactome	R-HSA-5654732	SRC; RPS27A; UBA52; GRB2; UBB; UBC; MAPK1	6714; 2885; 7316; 7311; 5594; 7314; 6233	29	29
7.01001e-08	5.04202e-07	Deactivation of the beta-catenin transactivating complex	Reactome	R-HSA-3769402	YWHAZ; RPS27A; CTNNB1; AKT1; UBA52; UBB; UBC	207; 1499; 7316; 7534; 7311; 7314; 6233	30	30
7.01001e-08	5.04202e-07	vegf hypoxia and angiogenesis	BioCarta	vegfpathway	SRC; PRKCA; HRAS; AKT1; GRB2; PIK3R1; HSP90AA1	207; 5578; 3265; 3320; 6714; 2885; 5295	30	30
7.01001e-08	5.04202e-07	Mitophagy	Reactome	R-HSA-5205647	SRC; RPS27A; UBA52; UBB; UBC; CSNK2A2; CSNK2A1	6714; 1457; 7316; 7311; 7314; 6233; 1459	30	30
7.10952e-08	5.07599e-07	regulation of splicing through sam68	BioCarta	sam68pathway	SRC; HRAS; MAPK1; RASA1; CDK1	6714; 5594; 5921; 3265; 983	10	10
8.4656e-08	6.00007e-07	Herpes simplex infection - Homo sapiens (human)	KEGG	path:hsa05168	SRSF1; TP53; TRAF6; SRSF2; JUN; CDK1; CDK2; HNRNPK; POLR2A; IKBKG; IKBKE; NFKB1; CSNK2A2; CSNK2A1	7189; 3190; 3725; 4790; 6426; 6427; 5430; 8517; 9641; 1457; 1459; 983; 7157; 1017	185	185
8.58218e-08	6.03862e-07	Listeria monocytogenes entry into host cells	Reactome	R-HSA-8876384	RPS27A; CTNNB1; UBA52; GRB2; UBB; UBC	7316; 7311; 1499; 7314; 2885; 6233	19	19
8.77781e-08	6.13183e-07	PI3K-Akt signaling pathway - Homo sapiens (human)	KEGG	path:hsa04151	BRCA1; YWHAZ; TP53; AKT1; PRKCA; HRAS; EGFR; YWHAG; HSP90AB1; RPS6; CDK2; GRB2; IKBKG; PIK3R1; HSP90AA1; NFKB1; MDM2; MYC; MAPK1	6194; 4193; 207; 8517; 4609; 672; 4790; 2885; 7532; 7157; 1017; 5295; 3265; 3320; 3326; 7534; 5578; 5594; 1956	352	351
8.95937e-08	6.21396e-07	Negative regulation of FGFR4 signaling	Reactome	R-HSA-5654733	SRC; RPS27A; UBA52; GRB2; UBB; UBC; MAPK1	6714; 2885; 7316; 7311; 5594; 7314; 6233	31	31
9.056e-08	6.23644e-07	Kaposi,s sarcoma-associated herpesvirus infection - Homo sapiens (human)	KEGG	path:hsa05167	SRC; TP53; UBB; HRAS; JUN; CTNNB1; AKT1; MAPK1; IKBKG; PIK3R1; IKBKE; NFKB1; MYC; LYN	4609; 6714; 3725; 7314; 5295; 4790; 3265; 207; 8517; 4067; 9641; 5594; 1499; 7157	186	186
1.10928e-07	7.53225e-07	MAP kinase activation	Reactome	R-HSA-450294	TRAF6; RPS27A; JUN; UBA52; MAPK1; IKBKG; UBB; UBC; NFKB1	3725; 4790; 7189; 8517; 7316; 7311; 5594; 7314; 6233	65	65
1.10928e-07	7.53225e-07	Interleukin-17 signaling	Reactome	R-HSA-448424	TRAF6; RPS27A; JUN; UBA52; MAPK1; IKBKG; UBB; UBC; NFKB1	3725; 4790; 7189; 8517; 7316; 7311; 5594; 7314; 6233	65	65
1.15818e-07	7.80968e-07	Signal Transduction	Reactome	R-HSA-162582	MYH10; MOV10; CLTC; JUN; HRAS; RPS27A; EGFR; SMAD2; SMAD3; CTNNB1; RPS6; HNRNPH1; IKBKG; CSNK2A2; ARRB1; ABL1; SMARCA4; YWHAZ; CDK1; FYN; UBA52; HSP90AA1; HSP90AB1; MAPK1; HNRNPM; PIK3R1; NFKB1; MYC; YWHAG; HNRNPF; SRC; NR3C1; HNRNPA1; TRAF6; HSPB1; PRKCA; SP1; TRIM27; VCL; PARP1; POLR2A; APC; MDM2; LYN; RASA1; CSNK2A1; SNW1; TP53; NCK1; AKT1; PHB; ESR1; DDX5; CDK2; GRB2; PRKACA; UBB; UBC; ARRB2;…	4193; 4087; 2534; 3185; 409; 4790; 7314; 6233; 3187; 1956; 7532; 8517; 142; 408; 6714; 2885; 22938; 7316; 1017; 5430; 3265; 3326; 4088; 4690; 1655; 324; 4609; 4670; 5594; 1457; 6597; 983; 5921; 3932; 5245; 7311; 6194; 7189; 3320; 3725; 5987; 7157; 25; 3178; 207; 4628; 5566; 5578; 1459; 1499; 6667; 60; 1213; 3315; 4067; 4904; 7534; 4343; 5295; 2099; 2908; 7414	2643	2629
1.21331e-07	8.06934e-07	egf signaling pathway	BioCarta	egfpathway	PRKCA; HRAS; EGFR; GRB2; PIK3R1; RASA1	5578; 5295; 3265; 5921; 2885; 1956	20	20
1.21331e-07	8.06934e-07	sprouty regulation of tyrosine kinase signals	BioCarta	sprypathway	SRC; GRB2; HRAS; EGFR; MAPK1; RASA1	5594; 6714; 3265; 5921; 1956; 2885	20	20
1.3134e-07	8.50207e-07	Regulation of PLK1 Activity at G2/M Transition	Reactome	R-HSA-2565942	TUBA1A; RPS27A; TUBB; CDK1; UBA52; PRKACA; UBB; UBC; HSP90AA1; YWHAG	983; 7846; 7532; 5566; 7314; 7311; 3320; 7316; 6233; 203068	87	87
1.3134e-07	8.50207e-07	MyD88 cascade initiated on plasma membrane	Reactome	R-HSA-975871	DHX9; TRAF6; RPS27A; JUN; UBA52; MAPK1; IKBKG; UBB; UBC; NFKB1	3725; 5594; 4790; 8517; 7311; 7314; 7189; 1660; 7316; 6233	87	87
1.3134e-07	8.50207e-07	Toll Like Receptor 10 (TLR10) Cascade	Reactome	R-HSA-168142	DHX9; TRAF6; RPS27A; JUN; UBA52; MAPK1; IKBKG; UBB; UBC; NFKB1	3725; 5594; 4790; 8517; 7311; 7314; 7189; 1660; 7316; 6233	87	87
1.3134e-07	8.50207e-07	Toll Like Receptor 5 (TLR5) Cascade	Reactome	R-HSA-168176	DHX9; TRAF6; RPS27A; JUN; UBA52; MAPK1; IKBKG; UBB; UBC; NFKB1	3725; 5594; 4790; 8517; 7311; 7314; 7189; 1660; 7316; 6233	87	87
1.4251e-07	9.04428e-07	phospholipids as signalling intermediaries	BioCarta	edg1pathway	SRC; PRKCA; HRAS; AKT1; GRB2; PIK3R1; MAPK1	207; 5578; 6714; 3265; 2885; 5594; 5295	33	33
1.4251e-07	9.04428e-07	CD28 co-stimulation	Reactome	R-HSA-389356	SRC; FYN; AKT1; GRB2; PIK3R1; LYN; LCK	4067; 207; 3932; 6714; 2534; 2885; 5295	33	33
1.4251e-07	9.04428e-07	Negative regulation of FGFR1 signaling	Reactome	R-HSA-5654726	SRC; RPS27A; UBA52; GRB2; UBB; UBC; MAPK1	6714; 2885; 7316; 7311; 5594; 7314; 6233	33	33
1.45222e-07	9.12426e-07	Signaling by TGF-beta Receptor Complex	Reactome	R-HSA-170834	SNW1; SP1; RPS27A; PARP1; SMAD2; SMAD3; UBA52; UBB; UBC	6667; 22938; 4088; 4087; 7316; 7311; 142; 7314; 6233	67	67
1.4659e-07	9.12426e-07	TRAF6 mediated induction of NFkB and MAP kinases upon TLR7/8 or 9 activation	Reactome	R-HSA-975138	DHX9; TRAF6; RPS27A; JUN; UBA52; MAPK1; IKBKG; UBB; UBC; NFKB1	3725; 5594; 4790; 8517; 7311; 7314; 7189; 1660; 7316; 6233	88	88
1.4659e-07	9.12426e-07	Gap junction - Homo sapiens (human)	KEGG	path:hsa04540	SRC; PRKCA; TUBA1A; EGFR; TUBB; CDK1; GRB2; PRKACA; MAPK1; HRAS	6714; 7846; 3265; 203068; 2885; 1956; 5566; 5578; 983; 5594	88	88
1.62999e-07	1.00403e-06	HIV Infection	Reactome	R-HSA-162906	TSG101; SSRP1; RPS27A; FYN; SLC25A6; SLC25A5; NUP153; UBA52; POLR2A; UBB; UBC; NPM1; LCK; XRCC6	293; 9972; 2534; 2547; 4869; 5430; 3932; 7251; 7311; 7314; 6749; 292; 7316; 6233	197	195
1.63375e-07	1.00403e-06	Host Interactions of HIV factors	Reactome	R-HSA-162909	RPS27A; FYN; SLC25A6; SLC25A5; NUP153; UBA52; UBB; UBC; NPM1; LCK	293; 9972; 292; 2534; 4869; 3932; 7311; 7314; 7316; 6233	89	89
1.68102e-07	1.02017e-06	igf-1 signaling pathway	BioCarta	igf1pathway	HRAS; JUN; GRB2; PIK3R1; RASA1; CSNK2A1	5295; 3265; 3725; 2885; 1457; 5921	21	21
1.68102e-07	1.02017e-06	TICAM1, RIP1-mediated IKK complex recruitment	Reactome	R-HSA-168927	TRAF6; RPS27A; UBA52; IKBKG; UBB; UBC	7316; 7189; 7311; 7314; 6233; 8517	21	21
1.77571e-07	1.07094e-06	Negative regulation of FGFR2 signaling	Reactome	R-HSA-5654727	SRC; RPS27A; UBA52; GRB2; UBB; UBC; MAPK1	6714; 2885; 7316; 7311; 5594; 7314; 6233	34	34
1.79873e-07	1.07654e-06	DNA Double-Strand Break Repair	Reactome	R-HSA-5693532	UBE2I; BRCA1; TP53; RPS27A; UBA52; PRKDC; CDK2; PARP1; PCNA; UBB; UBC; ABL1; XRCC6	1017; 5591; 2547; 7316; 7157; 7329; 25; 7311; 7314; 672; 5111; 142; 6233	169	167
1.81826e-07	1.07654e-06	MyD88 dependent cascade initiated on endosome	Reactome	R-HSA-975155	DHX9; TRAF6; RPS27A; JUN; UBA52; MAPK1; IKBKG; UBB; UBC; NFKB1	3725; 5594; 4790; 8517; 7311; 7314; 7189; 1660; 7316; 6233	90	90
1.81826e-07	1.07654e-06	Toll Like Receptor 7/8 (TLR7/8) Cascade	Reactome	R-HSA-168181	DHX9; TRAF6; RPS27A; JUN; UBA52; MAPK1; IKBKG; UBB; UBC; NFKB1	3725; 5594; 4790; 8517; 7311; 7314; 7189; 1660; 7316; 6233	90	90
2.1388e-07	1.25865e-06	B cell receptor signaling pathway - Homo sapiens (human)	KEGG	path:hsa04662	HRAS; JUN; AKT1; GRB2; IKBKG; PIK3R1; NFKB1; LYN; MAPK1	207; 3725; 5295; 8517; 4790; 3265; 2885; 5594; 4067	71	70
2.1963e-07	1.2847e-06	angiotensin ii mediated activation of jnk pathway via pyk2 dependent signaling	BioCarta	at1rpathway	SRC; PRKCA; EGFR; HRAS; JUN; GRB2; MAPK1	3725; 5578; 6714; 3265; 1956; 2885; 5594	35	35
2.28743e-07	1.33e-06	inhibition of cellular proliferation by gleevec	BioCarta	gleevecpathway	HRAS; JUN; AKT1; GRB2; PIK3R1; MYC	207; 3725; 3265; 2885; 5295; 4609	22	22
2.40101e-07	1.38773e-06	Cellular responses to external stimuli	Reactome	R-HSA-8953897	EEF1A1; HSP90AB1; NR3C1; RPS27A; TP53; HSPA5; HSPB1; SP1; HSPA8; JUN; UBA52; NUP153; MAPK1; CDK2; NFKB1; UBB; UBC; HSP90AA1; MDM2; MOV10	9972; 4193; 3312; 7316; 1017; 6667; 3326; 2908; 7311; 3320; 3725; 7157; 4790; 3315; 7314; 1915; 6233; 5594; 3309; 4343	414	413
2.42312e-07	1.39222e-06	Glioma - Homo sapiens (human)	KEGG	path:hsa05214	TP53; PRKCA; HRAS; EGFR; AKT1; GRB2; PIK3R1; MAPK1; MDM2	5295; 3265; 2885; 5578; 207; 1956; 5594; 4193; 7157	71	71
2.48627e-07	1.4201e-06	IL-17 signaling pathway - Homo sapiens (human)	KEGG	path:hsa04657	SRSF1; ELAVL1; TRAF6; IKBKE; JUN; HSP90AB1; MAPK1; IKBKG; HSP90AA1; NFKB1	7189; 3725; 4790; 3320; 3326; 6426; 8517; 9641; 1994; 5594	93	93
2.69778e-07	1.5319e-06	Signaling by RAS mutants	Reactome	R-HSA-6802949	SRC; PHB; HRAS; VCL; MAPK1; ARRB2; ARRB1	5245; 7414; 6714; 3265; 5594; 409; 408	36	36
2.75242e-07	1.55384e-06	Toll Like Receptor 9 (TLR9) Cascade	Reactome	R-HSA-168138	DHX9; TRAF6; RPS27A; JUN; UBA52; MAPK1; IKBKG; UBB; UBC; NFKB1	3725; 5594; 4790; 8517; 7311; 7314; 7189; 1660; 7316; 6233	94	94
2.90053e-07	1.62388e-06	keratinocyte differentiation	BioCarta	keratinocytepathway	PRKCA; JUN; HRAS; EGFR; GRB2; IKBKG; SP1; MAPK1	3725; 5578; 8517; 1956; 2885; 6667; 5594; 3265	53	53
2.90994e-07	1.62388e-06	Cytokine Signaling in Immune system	Reactome	R-HSA-1280215	YWHAZ; DHX9; PIK3R1; TRAF6; JUN; RPS27A; FYN; SMAD3; MAPK1; UBA52; GRB2; PRKACA; IKBKG; UBB; UBC; NFKB1; LYN; SMARCA4; LCK; EIF4A3; EIF4A2	6597; 2885; 1660; 7316; 2534; 4088; 3932; 7311; 7189; 3725; 4790; 7314; 1974; 6233; 4067; 5594; 5566; 5295; 8517; 9775; 7534	458	458
3.06268e-07	1.69935e-06	Regulation of RAS by GAPs	Reactome	R-HSA-5658442	HRAS; RPS27A; UBA52; UBB; UBC; RASA1	5921; 3265; 7316; 7311; 7314; 6233	24	23
3.24423e-07	1.78986e-06	Innate Immune System	Reactome	R-HSA-168249	SRC; JUN; HRAS; HSPA8; PRKDC; CTNNB1; IKBKG; IKBKE; ABL1; GSN; FYN; HSP90AB1; MAPK1; PIK3R1; EEF1A1; NFKB1; LYN; XRCC6; DHX9; RPS27A; DDX3X; TRAF6; VCL; NCK1; TUBB; UBA52; GRB2; PRKACA; UBB; UBC; HSP90AA1; ACTB; LCK; ILF2	1654; 2934; 3312; 2885; 1499; 1660; 7316; 3265; 9641; 3326; 4690; 60; 3932; 7311; 7189; 3320; 3725; 5591; 4790; 2534; 25; 7314; 6714; 1915; 6233; 4067; 2547; 5594; 5566; 5295; 8517; 7414; 3608; 203068	1077	1065
3.2923e-07	1.80611e-06	Regulation of mRNA stability by proteins that bind AU-rich elements	Reactome	R-HSA-450531	ELAVL1; HSPB1; PRKCA; PABPC1; HSPA8; AKT1; HNRNPD	3184; 1994; 3312; 5578; 207; 3315; 26986	37	37
3.36072e-07	1.83329e-06	PI5P, PP2A and IER3 Regulate PI3K/AKT Signaling	Reactome	R-HSA-6811558	SRC; TRAF6; ESR1; FYN; EGFR; GRB2; AKT1; MAPK1; PIK3R1; LCK	207; 2534; 1956; 5594; 6714; 5295; 2099; 3932; 2885; 7189	96	96
3.52144e-07	1.87875e-06	Constitutive Signaling by EGFRvIII	Reactome	R-HSA-5637810	HSP90AA1; HRAS; GRB2; EGFR; PIK3R1	1956; 5295; 3265; 2885; 3320	13	13
3.52144e-07	1.87875e-06	Signaling by EGFRvIII in Cancer	Reactome	R-HSA-5637812	HSP90AA1; HRAS; GRB2; EGFR; PIK3R1	1956; 5295; 3265; 2885; 3320	13	13
3.52144e-07	1.87875e-06	trka receptor signaling pathway	BioCarta	trkapathway	PRKCA; AKT1; HRAS; GRB2; PIK3R1	5295; 3265; 2885; 5578; 207	13	13
3.52144e-07	1.87875e-06	Downregulation of ERBB2:ERBB3 signaling	Reactome	R-HSA-1358803	AKT1; UBA52; RPS27A; UBB; UBC	7316; 207; 7314; 6233; 7311	13	13
3.55627e-07	1.88696e-06	AUF1 (hnRNP D0) binds and destabilizes mRNA	Reactome	R-HSA-450408	PABPC1; HSPA8; HNRNPD; HSPB1	3315; 3312; 26986; 3184	6	6
3.70684e-07	1.92478e-06	MyD88:Mal cascade initiated on plasma membrane	Reactome	R-HSA-166058	DHX9; TRAF6; RPS27A; JUN; UBA52; MAPK1; IKBKG; UBB; UBC; NFKB1	3725; 5594; 4790; 8517; 7311; 7314; 7189; 1660; 7316; 6233	97	97
3.70684e-07	1.92478e-06	Toll Like Receptor TLR1:TLR2 Cascade	Reactome	R-HSA-168179	DHX9; TRAF6; RPS27A; JUN; UBA52; MAPK1; IKBKG; UBB; UBC; NFKB1	3725; 5594; 4790; 8517; 7311; 7314; 7189; 1660; 7316; 6233	97	97
3.70684e-07	1.92478e-06	Toll Like Receptor TLR6:TLR2 Cascade	Reactome	R-HSA-168188	DHX9; TRAF6; RPS27A; JUN; UBA52; MAPK1; IKBKG; UBB; UBC; NFKB1	3725; 5594; 4790; 8517; 7311; 7314; 7189; 1660; 7316; 6233	97	97
3.70684e-07	1.92478e-06	Toll Like Receptor 2 (TLR2) Cascade	Reactome	R-HSA-181438	DHX9; TRAF6; RPS27A; JUN; UBA52; MAPK1; IKBKG; UBB; UBC; NFKB1	3725; 5594; 4790; 8517; 7311; 7314; 7189; 1660; 7316; 6233	97	97
3.91475e-07	2.02192e-06	Pancreatic cancer - Homo sapiens (human)	KEGG	path:hsa05212	TP53; EGFR; SMAD2; SMAD3; AKT1; MAPK1; IKBKG; PIK3R1; NFKB1	1956; 5295; 4790; 8517; 207; 4088; 4087; 5594; 7157	75	75
3.99331e-07	2.04079e-06	Paradoxical activation of RAF signaling by kinase inactive BRAF	Reactome	R-HSA-6802955	SRC; PHB; HRAS; VCL; MAPK1; ARRB2; ARRB1	5245; 6714; 3265; 5594; 409; 408; 7414	38	38
3.99331e-07	2.04079e-06	Signaling by moderate kinase activity BRAF mutants	Reactome	R-HSA-6802946	SRC; PHB; HRAS; VCL; MAPK1; ARRB2; ARRB1	5245; 7414; 6714; 3265; 5594; 409; 408	38	38
4.39321e-07	2.23341e-06	G1/S Transition	Reactome	R-HSA-69206	PCNA; CDK1; RPS27A; UBA52; AKT1; CDK2; UBB; UBC; MYC	1017; 207; 983; 7311; 5111; 7316; 4609; 7314; 6233	76	76
4.81571e-07	2.43544e-06	Degradation of beta-catenin by the destruction complex	Reactome	R-HSA-195253	RPS27A; CTNNB1; UBA52; UBB; UBC; APC; MYC	1499; 7316; 7311; 324; 4609; 7314; 6233	39	39
4.92158e-07	2.47609e-06	Interleukin-1 family signaling	Reactome	R-HSA-446652	DHX9; TRAF6; RPS27A; SMAD3; UBA52; IKBKG; UBB; UBC; NFKB1	4790; 7189; 4088; 8517; 1660; 7316; 7311; 7314; 6233	77	77
5.26232e-07	2.60699e-06	EGFR downregulation	Reactome	R-HSA-182971	RPS27A; EGFR; UBA52; GRB2; UBB; UBC	1956; 2885; 7316; 7311; 7314; 6233	25	25
5.26232e-07	2.60699e-06	NOTCH3 Activation and Transmission of Signal to the Nucleus	Reactome	R-HSA-9013507	RPS27A; EGFR; UBA52; UBB; UBC; YBX1	1956; 4904; 7316; 7311; 7314; 6233	25	25
5.26232e-07	2.60699e-06	IKK complex recruitment mediated by RIP1	Reactome	R-HSA-937041	TRAF6; RPS27A; UBA52; IKBKG; UBB; UBC	7189; 8517; 7316; 7311; 7314; 6233	25	25
5.42221e-07	2.65907e-06	Membrane binding and targetting of GAG proteins	Reactome	R-HSA-174490	TSG101; UBA52; RPS27A; UBB; UBC	7316; 7311; 7314; 6233; 7251	14	14
5.42221e-07	2.65907e-06	Synthesis And Processing Of GAG, GAGPOL Polyproteins	Reactome	R-HSA-174495	TSG101; UBA52; RPS27A; UBB; UBC	7316; 7311; 7314; 6233; 7251	14	14
5.64988e-07	2.7568e-06	Toll Like Receptor 4 (TLR4) Cascade	Reactome	R-HSA-166016	DHX9; RPS27A; TRAF6; UBC; JUN; UBA52; MAPK1; IKBKG; UBB; IKBKE; NFKB1	3725; 5594; 4790; 9641; 8517; 7311; 7314; 7189; 1660; 7316; 6233	127	127
6.51807e-07	3.16452e-06	Negative regulation of the PI3K/AKT network	Reactome	R-HSA-199418	SRC; TRAF6; ESR1; FYN; EGFR; GRB2; AKT1; MAPK1; PIK3R1; LCK	207; 2534; 1956; 5594; 6714; 5295; 2099; 3932; 2885; 7189	103	103
6.77012e-07	3.25435e-06	links between pyk2 and map kinases	BioCarta	pyk2pathway	SRC; PRKCA; HRAS; JUN; GRB2; MAPK1	3725; 5578; 6714; 3265; 2885; 5594	26	26
6.77012e-07	3.25435e-06	Downregulation of TGF-beta receptor signaling	Reactome	R-HSA-2173788	RPS27A; SMAD2; SMAD3; UBA52; UBB; UBC	4088; 4087; 7316; 7311; 7314; 6233	26	26
6.89188e-07	3.29656e-06	Bladder cancer - Homo sapiens (human)	KEGG	path:hsa05219	SRC; TP53; HRAS; EGFR; MAPK1; MYC; MDM2	4609; 6714; 3265; 5594; 4193; 1956; 7157	41	41
7.1342e-07	3.39574e-06	C-type lectin receptor signaling pathway - Homo sapiens (human)	KEGG	path:hsa04625	SRC; HRAS; JUN; AKT1; MAPK1; IKBKG; PIK3R1; IKBKE; NFKB1; MDM2	6714; 4193; 3725; 5295; 4790; 3265; 207; 8517; 9641; 5594	104	104
7.7177e-07	3.65555e-06	Hepatitis C - Homo sapiens (human)	KEGG	path:hsa05160	TP53; TRAF6; HRAS; EGFR; AKT1; GRB2; IKBKG; PIK3R1; IKBKE; NFKB1; MAPK1	7189; 5295; 4790; 3265; 207; 8517; 2885; 1956; 9641; 5594; 7157	131	131
7.77106e-07	3.66296e-06	Interleukin-1 signaling	Reactome	R-HSA-9020702	DHX9; TRAF6; RPS27A; UBA52; IKBKG; UBB; UBC; NFKB1	4790; 7189; 8517; 1660; 7316; 7311; 7314; 6233	60	60
8.05078e-07	3.6701e-06	Signaling by EGFR in Cancer	Reactome	R-HSA-1643713	HSP90AA1; HRAS; GRB2; EGFR; PIK3R1	5295; 3265; 2885; 3320; 1956	15	15
8.05078e-07	3.6701e-06	Constitutive Signaling by Ligand-Responsive EGFR Cancer Variants	Reactome	R-HSA-1236382	HSP90AA1; HRAS; GRB2; EGFR; PIK3R1	5295; 3265; 3320; 2885; 1956	15	15
8.05078e-07	3.6701e-06	Signaling by Ligand-Responsive EGFR Variants in Cancer	Reactome	R-HSA-5637815	HSP90AA1; HRAS; GRB2; EGFR; PIK3R1	5295; 3265; 3320; 2885; 1956	15	15
8.05078e-07	3.6701e-06	InlB-mediated entry of Listeria monocytogenes into host cell	Reactome	R-HSA-8875360	UBA52; GRB2; RPS27A; UBB; UBC	7316; 7311; 7314; 2885; 6233	15	15
8.05078e-07	3.6701e-06	GLI3 is processed to GLI3R by the proteasome	Reactome	R-HSA-5610785	UBA52; RPS27A; PRKACA; UBB; UBC	7316; 7311; 7314; 6233; 5566	15	15
8.05078e-07	3.6701e-06	Degradation of GLI2 by the proteasome	Reactome	R-HSA-5610783	UBA52; RPS27A; PRKACA; UBB; UBC	7316; 7311; 7314; 6233; 5566	15	15
8.05078e-07	3.6701e-06	Degradation of GLI1 by the proteasome	Reactome	R-HSA-5610780	UBA52; RPS27A; PRKACA; UBB; UBC	7316; 7311; 7314; 6233; 5566	16	15
8.21651e-07	3.69363e-06	Ubiquitin-dependent degradation of Cyclin D1	Reactome	R-HSA-69229	UBA52; RPS27A; UBB; UBC	7316; 7311; 7314; 6233	7	7
8.21651e-07	3.69363e-06	Ubiquitin-dependent degradation of Cyclin D	Reactome	R-HSA-75815	UBA52; RPS27A; UBB; UBC	7316; 7311; 7314; 6233	7	7
8.21651e-07	3.69363e-06	Vpu mediated degradation of CD4	Reactome	R-HSA-180534	UBA52; RPS27A; UBB; UBC	7316; 7311; 7314; 6233	7	7
8.61426e-07	3.85458e-06	transcription factor creb and its extracellular signals	BioCarta	crebpathway	PRKCA; HRAS; AKT1; GRB2; PIK3R1; MAPK1	207; 5578; 3265; 2885; 5594; 5295	27	27
8.84923e-07	3.94156e-06	Signaling by MET	Reactome	R-HSA-6806834	SRC; UBB; HRAS; RPS27A; UBA52; GRB2; PIK3R1; UBC	6714; 3265; 7316; 7311; 2885; 5295; 7314; 6233	61	61
8.98222e-07	3.98253e-06	Measles - Homo sapiens (human)	KEGG	path:hsa05162	TP53; TRAF6; HSPA8; FYN; AKT1; CDK2; PIK3R1; IKBKE; NFKB1; CSNK2A2; CSNK2A1	7189; 5295; 4790; 207; 3312; 9641; 1457; 1459; 1017; 2534; 7157	134	133
1.085e-06	4.76714e-06	influence of ras and rho proteins on g1 to s transition	BioCarta	raccycdpathway	HRAS; AKT1; CDK2; MAPK1; IKBKG; PIK3R1	207; 1017; 3265; 8517; 5594; 5295	28	28
1.085e-06	4.76714e-06	Regulation of RUNX2 expression and activity	Reactome	R-HSA-8939902	NR3C1; ESR1; RPS27A; UBA52; UBB; UBC	2908; 7316; 7311; 7314; 6233; 2099	28	28
1.1367e-06	4.91152e-06	MicroRNAs in cancer - Homo sapiens (human)	KEGG	path:hsa05206	BRCA1; UBE2I; TP53; PRKCA; GRB2; HRAS; EGFR; TPM1; VIM; MAPK1; HNRNPK; NFKB1; ABL1; APC; MYC; MDM2	7168; 4609; 7157; 25; 324; 3190; 5594; 4193; 672; 7329; 4790; 3265; 7431; 5578; 2885; 1956	299	299
1.1381e-06	4.91152e-06	Cyclin D associated events in G1	Reactome	R-HSA-69231	SRC; RPS27A; UBA52; UBB; UBC; ABL1; LYN	4067; 7311; 6714; 25; 7316; 7314; 6233	44	44
1.1381e-06	4.91152e-06	G1 Phase	Reactome	R-HSA-69236	SRC; RPS27A; UBA52; UBB; UBC; ABL1; LYN	4067; 7311; 6714; 25; 7316; 7314; 6233	44	44
1.1381e-06	4.91152e-06	Signaling by NOTCH3	Reactome	R-HSA-9012852	SNW1; RPS27A; EGFR; UBA52; UBB; UBC; YBX1	22938; 1956; 4904; 7316; 7311; 7314; 6233	44	44
1.15914e-06	4.91497e-06	cadmium induces dna synthesis and proliferation in macrophages	BioCarta	cdmacpathway	PRKCA; MYC; MAPK1; JUN; HRAS	5594; 4609; 3725; 5578; 3265	16	16
1.15914e-06	4.91497e-06	calcium signaling by hbx of hepatitis b virus	BioCarta	hbxpathway	SRC; HRAS; GRB2; JUN; CSNK2A1	6714; 3265; 3725; 2885; 1457	16	16
1.15914e-06	4.91497e-06	NRIF signals cell death from the nucleus	Reactome	R-HSA-205043	UBA52; RPS27A; UBB; TRAF6; UBC	7316; 7189; 7311; 7314; 6233	16	16
1.15914e-06	4.91497e-06	Translesion synthesis by REV1	Reactome	R-HSA-110312	PCNA; UBA52; RPS27A; UBB; UBC	7316; 7311; 7314; 6233; 5111	16	16
1.29745e-06	5.47749e-06	Apoptosis - Homo sapiens (human)	KEGG	path:hsa04210	TP53; HRAS; JUN; PARP1; AKT1; MAPK1; IKBKG; PIK3R1; NFKB1; ACTB; TUBA1A	60; 142; 7846; 5295; 4790; 3265; 207; 3725; 8517; 7157; 5594	138	138
1.34391e-06	5.61802e-06	Focal adhesion - Homo sapiens (human)	KEGG	path:hsa04510	SRC; PRKCA; FYN; HRAS; JUN; CTNNB1; AKT1; GRB2; PIK3R1; MAPK1; ACTB; VCL; EGFR	2534; 6714; 60; 3265; 3725; 5295; 207; 7414; 2885; 1956; 5578; 5594; 1499	199	199
1.35388e-06	5.61802e-06	Cyclin A:Cdk2-associated events at S phase entry	Reactome	R-HSA-69656	RPS27A; CDK2; AKT1; UBA52; UBB; UBC	207; 7316; 7311; 1017; 7314; 6233	29	29
1.35388e-06	5.61802e-06	fc epsilon receptor i signaling in mast cells	BioCarta	fcer1pathway	GRB2; HRAS; JUN; MAPK1; PIK3R1; LYN	4067; 3725; 3265; 2885; 5594; 5295	29	29
1.35388e-06	5.61802e-06	Downstream signal transduction	Reactome	R-HSA-186763	SRC; NCK1; HRAS; GRB2; PIK3R1; RASA1	5921; 6714; 3265; 4690; 2885; 5295	29	29
1.39381e-06	5.75911e-06	Fluid shear stress and atherosclerosis - Homo sapiens (human)	KEGG	path:hsa05418	SRC; TP53; JUN; HSP90AB1; AKT1; CTNNB1; IKBKG; PIK3R1; HSP90AA1; NFKB1; ACTB	6714; 60; 3725; 5295; 4790; 207; 3320; 3326; 8517; 7157; 1499	139	139
1.45345e-06	5.95485e-06	Mitophagy - animal - Homo sapiens (human)	KEGG	path:hsa04137	SRC; TP53; SP1; HRAS; JUN; UBB; CSNK2A2; CSNK2A1	3725; 6667; 7314; 1457; 1459; 6714; 7157; 3265	65	65
1.45345e-06	5.95485e-06	Shigellosis - Homo sapiens (human)	KEGG	path:hsa05131	SRC; U2AF1; VCL; MAPK1; IKBKG; ABL1; NFKB1; ACTB	7307; 25; 8517; 4790; 6714; 60; 7414; 5594	65	65
1.62546e-06	6.40703e-06	Translesion synthesis by POLK	Reactome	R-HSA-5655862	PCNA; UBA52; RPS27A; UBB; UBC	7316; 7311; 7314; 6233; 5111	17	17
1.62546e-06	6.40703e-06	Translesion synthesis by POLI	Reactome	R-HSA-5656121	PCNA; UBA52; RPS27A; UBB; UBC	7316; 7311; 7314; 6233; 5111	17	17
1.62546e-06	6.40703e-06	Assembly Of The HIV Virion	Reactome	R-HSA-175474	TSG101; UBA52; RPS27A; UBB; UBC	7316; 7311; 7314; 6233; 7251	17	17
1.62718e-06	6.40703e-06	cbl mediated ligand-induced downregulation of egf receptors pathway	BioCarta	cblpathway	PRKCA; SRC; GRB2; EGFR	6714; 1956; 2885; 5578	8	8
1.62718e-06	6.40703e-06	Downregulation of ERBB4 signaling	Reactome	R-HSA-1253288	UBA52; RPS27A; UBB; UBC	7316; 7311; 7314; 6233	8	8
1.62718e-06	6.40703e-06	Ubiquitin Mediated Degradation of Phosphorylated Cdc25A	Reactome	R-HSA-69601	UBA52; RPS27A; UBB; UBC	7316; 7311; 7314; 6233	8	8
1.62718e-06	6.40703e-06	p53-Independent DNA Damage Response	Reactome	R-HSA-69610	UBA52; RPS27A; UBB; UBC	7316; 7311; 7314; 6233	8	8
1.62718e-06	6.40703e-06	p53-Independent G1/S DNA damage checkpoint	Reactome	R-HSA-69613	UBA52; RPS27A; UBB; UBC	7316; 7311; 7314; 6233	8	8
1.6364e-06	6.40703e-06	Non-small cell lung cancer - Homo sapiens (human)	KEGG	path:hsa05223	TP53; PRKCA; GRB2; HRAS; EGFR; AKT1; MAPK1; PIK3R1	1956; 5295; 5578; 3265; 2885; 5594; 207; 7157	66	66
1.6364e-06	6.40703e-06	Acute myeloid leukemia - Homo sapiens (human)	KEGG	path:hsa05221	HRAS; AKT1; GRB2; IKBKG; PIK3R1; NFKB1; MAPK1; MYC	4609; 2885; 5295; 3265; 8517; 207; 5594; 4790	66	66
1.6364e-06	6.40703e-06	Signaling by ROBO receptors	Reactome	R-HSA-376176	NCK1; PRKCA; RPS27A; UBA52; PRKACA; UBB; UBC; ABL1	5578; 4690; 25; 5566; 7316; 7311; 7314; 6233	66	66
1.80962e-06	7.05679e-06	PCP/CE pathway	Reactome	R-HSA-4086400	CLTC; PRKCA; RPS27A; UBA52; ARRB2; UBB; UBC	5578; 409; 7316; 7311; 1213; 7314; 6233	47	47
1.83859e-06	7.1411e-06	Fc epsilon RI signaling pathway - Homo sapiens (human)	KEGG	path:hsa04664	PRKCA; HRAS; FYN; AKT1; GRB2; PIK3R1; MAPK1; LYN	5295; 3265; 2885; 5578; 207; 5594; 4067; 2534	68	67
2.05528e-06	7.9509e-06	Activated NOTCH1 Transmits Signal to the Nucleus	Reactome	R-HSA-2122948	UBC; RPS27A; UBA52; ARRB2; UBB; ARRB1	409; 7316; 7311; 408; 7314; 6233	32	31
2.06376e-06	7.95201e-06	Signaling by WNT	Reactome	R-HSA-195721	YWHAZ; CLTC; PRKCA; RPS27A; CTNNB1; AKT1; UBA52; ARRB2; UBB; UBC; APC; MYC; SMARCA4; CSNK2A2; CSNK2A1	409; 6597; 7316; 5578; 207; 7314; 1457; 4609; 1459; 1213; 6233; 7311; 1499; 324; 7534	278	276
2.22782e-06	8.48319e-06	nerve growth factor pathway (ngf)	BioCarta	ngfpathway	HRAS; GRB2; JUN; CSNK2A1; PIK3R1	5295; 3265; 3725; 2885; 1457	18	18
2.22782e-06	8.48319e-06	atm signaling pathway	BioCarta	atmpathway	ABL1; JUN; MDM2; TP53; BRCA1	7157; 4193; 3725; 25; 672	18	18
2.22782e-06	8.48319e-06	SCF(Skp2)-mediated degradation of p27/p21	Reactome	R-HSA-187577	UBA52; RPS27A; CDK2; UBB; UBC	7316; 7311; 7314; 6233; 1017	18	18
2.25653e-06	8.55894e-06	Beta-catenin independent WNT signaling	Reactome	R-HSA-3858494	CLTC; PRKCA; RPS27A; CTNNB1; UBA52; ARRB2; UBB; UBC; MYC	5578; 7311; 7314; 6233; 1499; 409; 7316; 1213; 4609	92	92
2.47166e-06	9.31208e-06	PI3K/AKT Signaling in Cancer	Reactome	R-HSA-2219528	SRC; ESR1; FYN; EGFR; AKT1; GRB2; PIK3R1; MDM2; LCK	207; 2534; 1956; 4193; 6714; 5295; 2099; 3932; 2885	93	93
2.47427e-06	9.31208e-06	Neurotrophin signaling pathway - Homo sapiens (human)	KEGG	path:hsa04722	TP53; TRAF6; HRAS; JUN; AKT1; GRB2; PIK3R1; ABL1; NFKB1; MAPK1	7189; 25; 3725; 5295; 4790; 3265; 207; 2885; 7157; 5594	119	119
2.50339e-06	9.34919e-06	bcr signaling pathway	BioCarta	bcrpathway	PRKCA; HRAS; JUN; GRB2; LYN; CSNK2A1	4067; 3725; 5578; 3265; 2885; 1457	32	32
2.50339e-06	9.34919e-06	TGF-beta receptor signaling activates SMADs	Reactome	R-HSA-2173789	RPS27A; SMAD2; SMAD3; UBA52; UBB; UBC	4088; 4087; 7316; 7311; 7314; 6233	32	32
2.57746e-06	9.58893e-06	Prolactin signaling pathway - Homo sapiens (human)	KEGG	path:hsa04917	SRC; ESR1; HRAS; AKT1; GRB2; PIK3R1; NFKB1; MAPK1	5295; 2099; 4790; 6714; 3265; 2885; 207; 5594	70	70
2.70422e-06	1.00221e-05	NF-kappa B signaling pathway - Homo sapiens (human)	KEGG	path:hsa04064	UBE2I; TRAF6; PARP1; CSNK2A2; IKBKG; NFKB1; LYN; LCK; CSNK2A1	7189; 142; 7329; 4790; 1457; 8517; 3932; 1459; 4067	95	94
2.90019e-06	1.07075e-05	Regulation of PTEN localization	Reactome	R-HSA-8948747	UBA52; RPS27A; UBB; UBC	7316; 7311; 7314; 6233	9	9
2.99282e-06	1.09661e-05	Gastrin-CREB signalling pathway via PKC and MAPK	Reactome	R-HSA-881907	PRKCA; GRB2; HRAS; MAPK1; EGFR	3265; 5594; 2885; 1956; 5578	19	19
2.99282e-06	1.09661e-05	Translesion Synthesis by POLH	Reactome	R-HSA-110320	PCNA; UBA52; RPS27A; UBB; UBC	7316; 7311; 7314; 6233; 5111	19	19
3.02803e-06	1.10534e-05	bioactive peptide induced signaling pathway	BioCarta	biopeptidespathway	PRKCA; GRB2; HRAS; FYN; MAPK1; PIK3R1	5578; 3265; 2534; 2885; 5594; 5295	33	33
3.22634e-06	1.17332e-05	Signaling by TGF-beta family members	Reactome	R-HSA-9006936	SNW1; SP1; RPS27A; PARP1; SMAD2; SMAD3; UBA52; UBB; UBC	6667; 7314; 4088; 7311; 22938; 4087; 7316; 142; 6233	96	96
3.55466e-06	1.2879e-05	Signaling by NOTCH1	Reactome	R-HSA-1980143	SNW1; UBC; UBA52; ARRB2; UBB; ARRB1; MYC; RPS27A	22938; 409; 7316; 7311; 408; 4609; 7314; 6233	74	73
3.63884e-06	1.3135e-05	Signaling by high-kinase activity BRAF mutants	Reactome	R-HSA-6802948	SRC; HRAS; VCL; MAPK1; ARRB2; ARRB1	6714; 3265; 5594; 409; 408; 7414	34	34
3.745e-06	1.34681e-05	Chemokine signaling pathway - Homo sapiens (human)	KEGG	path:hsa04062	SRC; HRAS; AKT1; GRB2; ARRB2; IKBKG; PIK3R1; ARRB1; NFKB1; LYN; MAPK1; PRKACA	6714; 207; 5295; 4790; 3265; 2885; 408; 409; 8517; 5566; 5594; 4067	185	185
3.81062e-06	1.36535e-05	Toll-Like Receptors Cascades	Reactome	R-HSA-168898	DHX9; RPS27A; TRAF6; UBC; JUN; UBA52; MAPK1; IKBKG; UBB; IKBKE; NFKB1	3725; 5594; 4790; 9641; 8517; 7311; 7314; 7189; 1660; 7316; 6233	154	154
4.10106e-06	1.46402e-05	Ub-specific processing proteases	Reactome	R-HSA-5689880	ARRB1; TP53; TRAF6; RPS27A; SMAD2; SMAD3; UBA52; ARRB2; IKBKG; UBB; UBC; MDM2; MYC	6233; 4193; 408; 7316; 7157; 7314; 4088; 8517; 7311; 7189; 409; 4087; 4609	220	220
4.17123e-06	1.46749e-05	Cargo recognition for clathrin-mediated endocytosis	Reactome	R-HSA-8856825	RPS27A; CLTC; UBC; EGFR; UBA52; GRB2; ARRB2; UBB; ARRB1	1956; 2885; 408; 7311; 7314; 409; 7316; 1213; 6233	99	99
4.17123e-06	1.46749e-05	AGE-RAGE signaling pathway in diabetic complications - Homo sapiens (human)	KEGG	path:hsa04933	PRKCA; HRAS; JUN; SMAD2; SMAD3; AKT1; MAPK1; PIK3R1; NFKB1	3725; 5295; 4790; 3265; 207; 5578; 4088; 5594; 4087	99	99
4.17123e-06	1.46749e-05	Cellular response to heat stress	Reactome	R-HSA-3371556	NUP153; HSPA5; HSPB1; EEF1A1; HSPA8; HSP90AB1; MAPK1; UBB; HSP90AA1	5594; 3309; 3326; 9972; 3315; 7314; 3312; 3320; 1915	99	99
4.17123e-06	1.46749e-05	Choline metabolism in cancer - Homo sapiens (human)	KEGG	path:hsa05231	PRKCA; SP1; HRAS; JUN; AKT1; GRB2; PIK3R1; MAPK1; EGFR	6667; 3725; 5295; 5578; 3265; 207; 2885; 1956; 5594	99	99
4.34626e-06	1.52355e-05	EPHB-mediated forward signaling	Reactome	R-HSA-3928662	SRC; HRAS; FYN; RASA1; LYN; ACTB	4067; 5921; 6714; 3265; 60; 2534	35	35
4.42351e-06	1.53951e-05	TCF dependent signaling in response to WNT	Reactome	R-HSA-201681	YWHAZ; RPS27A; CTNNB1; AKT1; UBA52; UBB; UBC; APC; MYC; SMARCA4; CSNK2A2; CSNK2A1	207; 6597; 7534; 7314; 1459; 7311; 1457; 4609; 1499; 7316; 324; 6233	190	188
4.42351e-06	1.53951e-05	Cellular Senescence	Reactome	R-HSA-2559583	TP53; SP1; RPS27A; JUN; UBA52; CDK2; MAPK1; UBB; UBC; NFKB1; MDM2; MOV10	3725; 6667; 5594; 4193; 1017; 7316; 7157; 7314; 4790; 4343; 7311; 6233	189	188
4.46192e-06	1.54733e-05	Osteoclast differentiation - Homo sapiens (human)	KEGG	path:hsa04380	TRAF6; FYN; JUN; AKT1; GRB2; IKBKG; PIK3R1; NFKB1; LCK; MAPK1	7189; 3725; 5295; 4790; 207; 8517; 3932; 2885; 5594; 2534	128	127
4.78625e-06	1.62498e-05	EGFR Transactivation by Gastrin	Reactome	R-HSA-2179392	PRKCA; HRAS; GRB2; EGFR	3265; 1956; 2885; 5578	10	10
4.78625e-06	1.62498e-05	overview of telomerase protein component gene htert transcriptional regulation	BioCarta	tertpathway	SP1; MYC; TP53; ESR1	4609; 2099; 7157; 6667	10	10
4.78625e-06	1.62498e-05	Degradation of AXIN	Reactome	R-HSA-4641257	UBA52; RPS27A; UBB; UBC	7316; 7311; 6233; 7314	10	10
4.78625e-06	1.62498e-05	SCF-beta-TrCP mediated degradation of Emi1	Reactome	R-HSA-174113	UBA52; RPS27A; UBB; UBC	7316; 7311; 7314; 6233	10	10
4.78625e-06	1.62498e-05	Vif-mediated degradation of APOBEC3G	Reactome	R-HSA-180585	UBA52; RPS27A; UBB; UBC	7316; 7311; 7314; 6233	10	10
4.78625e-06	1.62498e-05	FBXL7 down-regulates AURKA during mitotic entry and in early mitosis	Reactome	R-HSA-8854050	UBA52; RPS27A; UBB; UBC	7316; 7314; 6233; 7311	10	10
4.82955e-06	1.63397e-05	Recruitment and ATM-mediated phosphorylation of repair and signaling proteins at DNA double strand breaks	Reactome	R-HSA-5693565	UBE2I; BRCA1; TP53; RPS27A; UBA52; UBB; UBC; ABL1	7157; 7329; 25; 672; 7316; 7311; 7314; 6233	77	76
5.10724e-06	1.71237e-05	Platelet activation, signaling and aggregation	Reactome	R-HSA-76002	YWHAZ; SRC; HSPA5; PRKCA; VCL; FYN; GRB2; AKT1; MAPK1; ARRB2; PIK3R1; ARRB1; LYN; LCK	4067; 7414; 207; 2534; 5594; 5578; 3309; 6714; 5295; 2885; 3932; 409; 7534; 408	260	260
5.13182e-06	1.71237e-05	CTLA4 inhibitory signaling	Reactome	R-HSA-389513	SRC; LYN; FYN; LCK; AKT1	4067; 6714; 2534; 3932; 207	21	21
5.13182e-06	1.71237e-05	cell cycle: g2/m checkpoint	BioCarta	g2pathway	BRCA1; CDK1; MDM2; TP53; PRKDC	7157; 672; 983; 4193; 5591	21	21
5.13182e-06	1.71237e-05	Negative regulation of MET activity	Reactome	R-HSA-6807004	GRB2; UBA52; RPS27A; UBB; UBC	7316; 7311; 7314; 6233; 2885	21	21
5.16156e-06	1.71639e-05	Regulation of APC/C activators between G1/S and early anaphase	Reactome	R-HSA-176408	RPS27A; UBA52; CDK1; CDK2; UBB; UBC	1017; 983; 7316; 7311; 7314; 6233	36	36
5.33243e-06	1.76517e-05	DNA Double Strand Break Response	Reactome	R-HSA-5693606	UBE2I; BRCA1; TP53; RPS27A; UBA52; UBB; UBC; ABL1	7157; 7329; 25; 672; 7316; 7311; 7314; 6233	78	77
5.34458e-06	1.76517e-05	Chagas disease (American trypanosomiasis) - Homo sapiens (human)	KEGG	path:hsa05142	TRAF6; JUN; SMAD2; SMAD3; AKT1; MAPK1; IKBKG; PIK3R1; NFKB1	7189; 3725; 5295; 4790; 207; 8517; 4088; 5594; 4087	102	102
5.36648e-06	1.76639e-05	t cell receptor signaling pathway	BioCarta	tcrpathway	PRKCA; JUN; HRAS; FYN; GRB2; PIK3R1; LCK	3725; 5578; 3932; 3265; 2534; 2885; 5295	55	55
5.89444e-06	1.93361e-05	FoxO signaling pathway - Homo sapiens (human)	KEGG	path:hsa04068	HRAS; EGFR; SMAD2; SMAD3; AKT1; CDK2; GRB2; PIK3R1; MAPK1; MDM2	4193; 5295; 3265; 207; 2885; 1956; 1017; 5594; 4087; 4088	132	131
6.5739e-06	2.14925e-05	erk1/erk2 mapk signaling pathway	BioCarta	erkpathway	SRC; HRAS; GRB2; MYC; MAPK1	6714; 3265; 2885; 5594; 4609	22	22
7.16513e-06	2.31911e-05	MAP2K and MAPK activation	Reactome	R-HSA-5674135	SRC; HRAS; VCL; MAPK1; ARRB2; ARRB1	5594; 6714; 3265; 409; 408; 7414	38	38
7.16513e-06	2.31911e-05	Hedgehog ,on, state	Reactome	R-HSA-5632684	UBC; RPS27A; UBA52; ARRB2; UBB; ARRB1	6233; 409; 7316; 7311; 408; 7314	39	38
7.16513e-06	2.31911e-05	DNA Damage Recognition in GG-NER	Reactome	R-HSA-5696394	RPS27A; PARP1; UBA52; UBB; UBC; ACTB	7316; 7311; 142; 7314; 6233; 60	38	38
7.44753e-06	2.3788e-05	GAB1 signalosome	Reactome	R-HSA-180292	SRC; GRB2; EGFR; PIK3R1	5295; 6714; 1956; 2885	11	11
7.44753e-06	2.3788e-05	The role of GTSE1 in G2/M progression after G2 checkpoint	Reactome	R-HSA-8852276	HSP90AB1; HSP90AA1; TP53; CDK1	7157; 3320; 3326; 983	11	11
7.44753e-06	2.3788e-05	Hh mutants that don,t undergo autocatalytic processing are degraded by ERAD	Reactome	R-HSA-5362768	UBA52; RPS27A; UBB; UBC	7316; 7311; 7314; 6233	11	11
7.44753e-06	2.3788e-05	Hh mutants abrogate ligand secretion	Reactome	R-HSA-5387390	UBA52; RPS27A; UBB; UBC	7316; 7311; 7314; 6233	11	11
7.93015e-06	2.52465e-05	Th17 cell differentiation - Homo sapiens (human)	KEGG	path:hsa04659	JUN; SMAD2; SMAD3; HSP90AB1; MAPK1; IKBKG; HSP90AA1; NFKB1; LCK	3725; 4790; 3320; 3326; 8517; 3932; 5594; 4087; 4088	107	107
8.64932e-06	2.7446e-05	VEGF signaling pathway - Homo sapiens (human)	KEGG	path:hsa04370	SRC; HSPB1; PRKCA; HRAS; AKT1; MAPK1; PIK3R1	207; 5295; 3315; 6714; 3265; 5578; 5594	59	59
9.37023e-06	2.95631e-05	Clathrin-mediated endocytosis	Reactome	R-HSA-8856828	ARRB1; RPS27A; CLTC; HSPA8; EGFR; UBA52; GRB2; ARRB2; UBB; UBC	1956; 2885; 3312; 7311; 7314; 409; 7316; 408; 1213; 6233	138	138
9.37738e-06	2.95631e-05	C-type lectin receptors (CLRs)	Reactome	R-HSA-5621481	SRC; TRAF6; HRAS; FYN; PRKACA; IKBKG; NFKB1; LYN	4067; 4790; 7189; 6714; 3265; 5566; 8517; 2534	83	83
9.75728e-06	3.05623e-05	Negative regulation of MAPK pathway	Reactome	R-HSA-5675221	HRAS; RPS27A; UBA52; MAPK1; UBB; UBC	7316; 7311; 5594; 3265; 7314; 6233	40	40
9.75728e-06	3.05623e-05	Transcriptional regulation by the AP-2 (TFAP2) family of transcription factors	Reactome	R-HSA-8864260	UBE2I; ESR1; EGFR; HSPD1; MYC; NPM1	7329; 1956; 4609; 3329; 2099; 4869	40	40
9.98856e-06	3.10862e-05	Homology Directed Repair	Reactome	R-HSA-5693538	UBE2I; BRCA1; RPS27A; UBA52; PARP1; CDK2; PCNA; UBB; UBC; ABL1	1017; 7316; 7329; 25; 7311; 7314; 672; 5111; 142; 6233	141	139
9.98856e-06	3.10862e-05	Signaling pathways regulating pluripotency of stem cells - Homo sapiens (human)	KEGG	path:hsa04550	HRAS; SMAD2; SMAD3; CTNNB1; AKT1; GRB2; PIK3R1; APC; MYC; MAPK1	4609; 5295; 3265; 207; 1499; 324; 2885; 5594; 4087; 4088	139	139
1.02548e-05	3.18128e-05	Global Genome Nucleotide Excision Repair (GG-NER)	Reactome	R-HSA-5696399	UBE2I; PCNA; RPS27A; PARP1; UBA52; UBB; UBC; ACTB	7329; 5111; 7316; 7311; 142; 7314; 6233; 60	84	84
1.03967e-05	3.21503e-05	APC/C:Cdc20 mediated degradation of Cyclin B	Reactome	R-HSA-174048	CDK1; UBA52; RPS27A; UBB; UBC	983; 7316; 7311; 7314; 6233	24	24
1.08303e-05	3.33849e-05	Oncogenic MAPK signaling	Reactome	R-HSA-6802957	SRC; PHB; HRAS; VCL; MAPK1; ARRB2; ARRB1	7414; 5245; 6714; 3265; 5594; 409; 408	61	61
1.10618e-05	3.37769e-05	PECAM1 interactions	Reactome	R-HSA-210990	SRC; LYN; FYN; LCK	4067; 6714; 2534; 3932	12	12
1.10618e-05	3.37769e-05	Josephin domain DUBs	Reactome	R-HSA-5689877	UBA52; RPS27A; UBB; UBC	7316; 7311; 7314; 6233	12	12
1.10618e-05	3.37769e-05	Degradation of DVL	Reactome	R-HSA-4641258	UBA52; RPS27A; UBB; UBC	7316; 7311; 7314; 6233	12	12
1.11163e-05	3.38369e-05	DNA Repair	Reactome	R-HSA-73894	UBE2I; BRCA1; TP53; PCNA; RPS27A; UBA52; PRKDC; CDK2; PARP1; POLR2A; UBB; UBC; ABL1; ACTB; XRCC6	1017; 5591; 2547; 7157; 25; 60; 7329; 7311; 5430; 7314; 672; 5111; 7316; 142; 6233	320	317
1.13118e-05	3.41111e-05	APC/C-mediated degradation of cell cycle proteins	Reactome	R-HSA-174143	RPS27A; CDK2; CDK1; UBA52; UBB; UBC	983; 7316; 7311; 1017; 7314; 6233	41	41
1.13118e-05	3.41111e-05	Regulation of mitotic cell cycle	Reactome	R-HSA-453276	RPS27A; CDK2; CDK1; UBA52; UBB; UBC	983; 7316; 7311; 1017; 7314; 6233	41	41
1.13118e-05	3.41111e-05	Dual Incision in GG-NER	Reactome	R-HSA-5696400	PCNA; RPS27A; PARP1; UBA52; UBB; UBC	5111; 7316; 7311; 142; 7314; 6233	41	41
1.19797e-05	3.60132e-05	Human papillomavirus infection - Homo sapiens (human)	KEGG	path:hsa05165	TP53; HRAS; IKBKE; EGFR; CTNNB1; AKT1; CDK2; GRB2; PRKACA; IKBKG; PIK3R1; APC; NFKB1; MDM2; MAPK1	5295; 4193; 4790; 3265; 207; 324; 8517; 1956; 9641; 5566; 2885; 5594; 1499; 7157; 1017	319	319
1.23826e-05	3.71096e-05	Nucleotide Excision Repair	Reactome	R-HSA-5696398	UBE2I; PCNA; RPS27A; PARP1; UBA52; POLR2A; UBB; UBC; ACTB	5430; 7316; 60; 7329; 7311; 7314; 5111; 142; 6233	113	113
1.25972e-05	3.76364e-05	Endocytosis - Homo sapiens (human)	KEGG	path:hsa04144	TSG101; SRC; CLTC; TRAF6; HRAS; HSPA8; EGFR; SMAD2; SMAD3; ARRB2; UBB; ARRB1; MDM2	7189; 6714; 7251; 4193; 7314; 1213; 3265; 3312; 408; 409; 1956; 4087; 4088	244	244
1.28643e-05	3.80831e-05	regulation of eif-4e and p70s6 kinase	BioCarta	eif4pathway	PRKCA; AKT1; MAPK1; PIK3R1; PABPC1	207; 5578; 26986; 5594; 5295	25	25
1.28643e-05	3.80831e-05	Gap-filling DNA repair synthesis and ligation in GG-NER	Reactome	R-HSA-5696397	PCNA; UBA52; RPS27A; UBB; UBC	5111; 7316; 7311; 7314; 6233	25	25
1.28643e-05	3.80831e-05	cell cycle: g1/s check point	BioCarta	g1pathway	ABL1; CDK1; CDK2; TP53; SMAD3	7157; 1017; 983; 4088; 25	25	25
1.44909e-05	4.27679e-05	Wnt signaling pathway - Homo sapiens (human)	KEGG	path:hsa04310	TP53; PRKCA; JUN; SMAD3; CTNNB1; PRKACA; APC; MYC; CSNK2A2; CSNK2A1	4609; 3725; 324; 7157; 1457; 1459; 5566; 5578; 1499; 4088	146	145
1.50218e-05	4.42006e-05	Formation of Incision Complex in GG-NER	Reactome	R-HSA-5696395	UBE2I; RPS27A; PARP1; UBA52; UBB; UBC	7329; 7316; 7311; 142; 7314; 6233	43	43
1.57661e-05	4.61347e-05	Orc1 removal from chromatin	Reactome	R-HSA-68949	CDK2; RPS27A; UBA52; UBB; UBC	1017; 7316; 7311; 7314; 6233	26	26
1.58217e-05	4.61347e-05	p53 signaling pathway	BioCarta	p53pathway	PCNA; MDM2; TP53; CDK2	7157; 4193; 1017; 5111	13	13
1.58217e-05	4.61347e-05	Receptor-ligand binding initiates the second proteolytic cleavage of Notch receptor	Reactome	R-HSA-156988	UBA52; RPS27A; UBB; UBC	7316; 7311; 7314; 6233	13	13
1.65697e-05	4.81713e-05	Central carbon metabolism in cancer - Homo sapiens (human)	KEGG	path:hsa05230	TP53; HRAS; EGFR; AKT1; MAPK1; PIK3R1; MYC	4609; 5295; 1956; 3265; 207; 5594; 7157	65	65
1.7214e-05	4.98949e-05	Interleukin-3, 5 and GM-CSF signaling	Reactome	R-HSA-512988	YWHAZ; FYN; GRB2; PRKACA; PIK3R1; LYN	4067; 2534; 5566; 2885; 7534; 5295	44	44
1.91535e-05	5.5187e-05	role of erk5 in neuronal survival pathway	BioCarta	erk5pathway	AKT1; HRAS; GRB2; PIK3R1; MAPK1	207; 3265; 2885; 5594; 5295	27	27
1.91535e-05	5.5187e-05	FGFR2 alternative splicing	Reactome	R-HSA-6803529	HNRNPH1; HNRNPA1; POLR2A; HNRNPM; HNRNPF	5430; 4670; 3187; 3178; 3185	27	27
1.94836e-05	5.59721e-05	Fc epsilon receptor (FCERI) signaling	Reactome	R-HSA-2454202	TRAF6; FYN; HRAS; JUN; GRB2; MAPK1; IKBKG; PIK3R1; NFKB1; LYN	4067; 3265; 2534; 3725; 5594; 2885; 4790; 5295; 8517; 7189	150	150
2.01097e-05	5.74676e-05	GnRH signaling pathway - Homo sapiens (human)	KEGG	path:hsa04912	SRC; PRKCA; EGFR; HRAS; JUN; GRB2; PRKACA; MAPK1	6714; 3725; 3265; 2885; 1956; 5566; 5578; 5594	92	92
2.01225e-05	5.74676e-05	SUMO E3 ligases SUMOylate target proteins	Reactome	R-HSA-3108232	UBE2I; BRCA1; TP53; PARP1; NUP153; HNRNPK; PCNA; MDM2; HNRNPC	9972; 3183; 7157; 7329; 4193; 672; 5111; 3190; 142	120	120
2.17698e-05	6.19895e-05	Small cell lung cancer - Homo sapiens (human)	KEGG	path:hsa05222	TP53; TRAF6; AKT1; CDK2; IKBKG; PIK3R1; NFKB1; MYC	4609; 7189; 5295; 4790; 207; 8517; 7157; 1017	93	93
2.19335e-05	6.22731e-05	CDT1 association with the CDC6:ORC:origin complex	Reactome	R-HSA-68827	UBA52; RPS27A; UBB; UBC	7316; 7311; 7314; 6233	14	14
2.2356e-05	6.32876e-05	Constitutive Signaling by Aberrant PI3K in Cancer	Reactome	R-HSA-2219530	SRC; ESR1; FYN; EGFR; GRB2; PIK3R1; LCK	3932; 6714; 2534; 2885; 1956; 5295; 2099	68	68
2.28627e-05	6.45339e-05	M Phase	Reactome	R-HSA-68886	PRKCA; TUBA1A; RPS27A; TUBB; YWHAG; NUP153; CDK1; UBA52; MAPK1; PRKACA; UBB; UBC; HSP90AA1; CSNK2A2; CSNK2A1	5594; 983; 9972; 1457; 7846; 5578; 7314; 5566; 1459; 7532; 7311; 3320; 7316; 6233; 203068	338	337
2.30814e-05	6.4588e-05	Cdc20:Phospho-APC/C mediated degradation of Cyclin A	Reactome	R-HSA-174184	CDK1; UBA52; RPS27A; UBB; UBC	983; 7316; 7311; 7314; 6233	28	28
2.30814e-05	6.4588e-05	Attenuation phase	Reactome	R-HSA-3371568	HSP90AB1; HSP90AA1; HSPA8; UBB; HSPB1	7314; 3320; 3315; 3326; 3312	28	28
2.30814e-05	6.4588e-05	CDK-mediated phosphorylation and removal of Cdc6	Reactome	R-HSA-69017	UBA52; RPS27A; CDK2; UBB; UBC	7316; 7311; 1017; 7314; 6233	28	28
2.53814e-05	7.082e-05	NOTCH1 Intracellular Domain Regulates Transcription	Reactome	R-HSA-2122947	SNW1; RPS27A; UBA52; UBB; UBC; MYC	22938; 7316; 7311; 4609; 7314; 6233	47	47
2.7608e-05	7.65924e-05	APC:Cdc20 mediated degradation of cell cycle proteins prior to satisfation of the cell cycle checkpoint	Reactome	R-HSA-179419	CDK1; UBA52; RPS27A; UBB; UBC	983; 7316; 7311; 7314; 6233	29	29
2.7608e-05	7.65924e-05	the information processing pathway at the ifn beta enhancer	BioCarta	pcafpathway	POLR2A; NR3C1; SMARCA4; JUN; ACTB	3725; 2908; 5430; 6597; 60	29	29
2.78916e-05	7.71587e-05	Oxidative Stress Induced Senescence	Reactome	R-HSA-2559580	TP53; RPS27A; JUN; UBA52; MAPK1; UBB; UBC; MOV10; MDM2	3725; 5594; 4193; 7316; 7157; 7314; 4343; 7311; 6233	126	125
2.87078e-05	7.91913e-05	il-2 receptor beta chain in t cell activation	BioCarta	il2rbpathway	PCNA; HRAS; AKT1; GRB2; PIK3R1; MAPK1	207; 3265; 2885; 5111; 5594; 5295	48	48
2.96165e-05	8.05537e-05	EPHA-mediated growth cone collapse	Reactome	R-HSA-3928663	MYH10; SRC; LYN; FYN	4628; 4067; 6714; 2534	15	15
2.96165e-05	8.05537e-05	estrogen responsive protein efp controls cell cycle and breast tumors growth	BioCarta	efppathway	CDK1; CDK2; TP53; ESR1	7157; 2099; 1017; 983	15	15
2.96165e-05	8.05537e-05	Constitutive Signaling by NOTCH1 HD Domain Mutants	Reactome	R-HSA-2691232	UBA52; RPS27A; UBB; UBC	7316; 7311; 7314; 6233	15	15
2.96165e-05	8.05537e-05	Signaling by NOTCH1 HD Domain Mutants in Cancer	Reactome	R-HSA-2691230	UBA52; RPS27A; UBB; UBC	7316; 7311; 7314; 6233	15	15
2.96165e-05	8.05537e-05	Regulation of innate immune responses to cytosolic DNA	Reactome	R-HSA-3134975	UBA52; RPS27A; UBB; UBC	7316; 7311; 7314; 6233	15	15
2.97174e-05	8.06023e-05	SUMOylation	Reactome	R-HSA-2990846	UBE2I; BRCA1; TP53; PARP1; NUP153; HNRNPK; PCNA; MDM2; HNRNPC	9972; 3183; 7157; 7329; 4193; 672; 5111; 3190; 142	126	126
3.25705e-05	8.80945e-05	Melanoma - Homo sapiens (human)	KEGG	path:hsa05218	TP53; HRAS; EGFR; AKT1; MAPK1; PIK3R1; MDM2	207; 5295; 3265; 1956; 5594; 4193; 7157	72	72
3.27946e-05	8.82093e-05	DAP12 signaling	Reactome	R-HSA-2424491	HRAS; GRB2; FYN; LCK; PIK3R1	3932; 2534; 2885; 5295; 3265	30	30
3.27946e-05	8.82093e-05	Budding and maturation of HIV virion	Reactome	R-HSA-162588	TSG101; UBA52; RPS27A; UBB; UBC	7316; 7251; 7311; 7314; 6233	30	30
3.43358e-05	9.20996e-05	Progesterone-mediated oocyte maturation - Homo sapiens (human)	KEGG	path:hsa04914	CDK1; HSP90AB1; AKT1; CDK2; MAPK1; PRKACA; PIK3R1; HSP90AA1	5295; 207; 3320; 3326; 5566; 983; 5594; 1017	99	99
3.67346e-05	9.82624e-05	Ras signaling pathway - Homo sapiens (human)	KEGG	path:hsa04014	PRKCA; HRAS; EGFR; AKT1; GRB2; PRKACA; IKBKG; PIK3R1; ABL1; NFKB1; RASA1; MAPK1	25; 207; 5921; 4790; 3265; 2885; 8517; 1956; 5566; 5578; 5594; 5295	232	232
3.69272e-05	9.85062e-05	HIF-1 signaling pathway - Homo sapiens (human)	KEGG	path:hsa04066	AKT1; PRKCA; EGFR; GAPDH; RPS6; MAPK1; PIK3R1; NFKB1	2597; 6194; 5295; 4790; 207; 1956; 5578; 5594	100	100
3.72291e-05	9.90396e-05	Transcriptional regulation by RUNX1	Reactome	R-HSA-8878171	SRC; MOV10; ESR1; RPS27A; UBA52; UBB; UBC; ABL1; SMARCA4; CSNK2A2; CSNK2A1	1457; 7316; 6714; 4343; 2099; 7314; 6597; 25; 1459; 7311; 6233	198	196
3.8706e-05	0.00010152	APC/C:Cdc20 mediated degradation of mitotic proteins	Reactome	R-HSA-176409	CDK1; UBA52; RPS27A; UBB; UBC	983; 7316; 7311; 7314; 6233	31	31
3.8706e-05	0.00010152	Recognition of DNA damage by PCNA-containing replication complex	Reactome	R-HSA-110314	PCNA; UBA52; RPS27A; UBB; UBC	5111; 7316; 7311; 7314; 6233	31	31
3.8706e-05	0.00010152	HSF1 activation	Reactome	R-HSA-3371511	EEF1A1; HSP90AA1; HSP90AB1; UBB; HSPB1	7314; 3320; 3315; 1915; 3326	31	31
3.8706e-05	0.00010152	erk and pi-3 kinase are necessary for collagen binding in corneal epithelia	BioCarta	ecmpathway	SRC; MAPK1; VCL; PIK3R1; GSN	7414; 6714; 5594; 2934; 5295	31	31
3.89603e-05	0.00010152	EPH-Ephrin signaling	Reactome	R-HSA-2682334	MYH10; SRC; ACTB; HRAS; FYN; LYN; RASA1	4067; 5921; 6714; 3265; 2534; 4628; 60	74	74
3.91023e-05	0.00010152	chromatin remodeling by hswi/snf atp-dependent complexes	BioCarta	hswisnfpathway	POLR2A; ACTB; SMARCA4; NR3C1	60; 6597; 2908; 5430	16	16
3.91023e-05	0.00010152	human cytomegalovirus and map kinase pathways	BioCarta	hcmvpathway	AKT1; MAPK1; PIK3R1; SP1	207; 5594; 6667; 5295	16	16
3.91023e-05	0.00010152	TGF-beta receptor signaling in EMT (epithelial to mesenchymal transition)	Reactome	R-HSA-2173791	UBA52; RPS27A; UBB; UBC	7316; 7311; 7314; 6233	16	16
3.91023e-05	0.00010152	Defective CFTR causes cystic fibrosis	Reactome	R-HSA-5678895	UBA52; RPS27A; UBB; UBC	7316; 7311; 7314; 6233	16	16
4.54102e-05	0.000116958	Activation of APC/C and APC/C:Cdc20 mediated degradation of mitotic proteins	Reactome	R-HSA-176814	CDK1; UBA52; RPS27A; UBB; UBC	983; 7316; 7311; 7314; 6233	32	32
4.54102e-05	0.000116958	Termination of translesion DNA synthesis	Reactome	R-HSA-5656169	PCNA; UBA52; RPS27A; UBB; UBC	5111; 7316; 7311; 7314; 6233	32	32
4.54102e-05	0.000116958	Endosomal Sorting Complex Required For Transport (ESCRT)	Reactome	R-HSA-917729	TSG101; UBA52; RPS27A; UBB; UBC	7251; 7316; 7311; 7314; 6233	32	32
4.55679e-05	0.000117054	HDR through Homologous Recombination (HR) or Single Strand Annealing (SSA)	Reactome	R-HSA-5693567	UBE2I; BRCA1; RPS27A; UBA52; CDK2; PCNA; UBB; UBC; ABL1	1017; 7316; 7329; 25; 7311; 7314; 672; 5111; 6233	135	133
4.56908e-05	0.00011706	mechanism of gene regulation by peroxisome proliferators via ppara	BioCarta	pparapathway	PRKCA; SP1; JUN; MAPK1; HSP90AA1; MYC	3320; 3725; 5578; 6667; 5594; 4609	52	52
4.89874e-05	0.000125176	Toll-like receptor signaling pathway - Homo sapiens (human)	KEGG	path:hsa04620	TRAF6; JUN; AKT1; MAPK1; IKBKG; PIK3R1; IKBKE; NFKB1	7189; 3725; 5295; 4790; 207; 8517; 9641; 5594	104	104
5.04465e-05	0.000128035	Costimulation by the CD28 family	Reactome	R-HSA-388841	SRC; FYN; AKT1; GRB2; PIK3R1; LYN; LCK	4067; 207; 3932; 6714; 2534; 2885; 5295	77	77
5.06337e-05	0.000128035	the igf-1 receptor and longevity	BioCarta	longevitypathway	AKT1; HRAS; GRB2; PIK3R1	207; 3265; 2885; 5295	17	17
5.06337e-05	0.000128035	ABC transporter disorders	Reactome	R-HSA-5619084	UBA52; RPS27A; UBB; UBC	7316; 7311; 7314; 6233	17	17
5.06337e-05	0.000128035	Disorders of transmembrane transporters	Reactome	R-HSA-5619115	UBA52; RPS27A; UBB; UBC	7316; 7311; 7314; 6233	17	17
5.09922e-05	0.000128606	Signaling by PDGF	Reactome	R-HSA-186797	SRC; NCK1; HRAS; GRB2; PIK3R1; RASA1	6714; 3265; 5921; 4690; 2885; 5295	53	53
5.29784e-05	0.00013327	integrin signaling pathway	BioCarta	integrinpathway	SRC; HRAS; GRB2; FYN; VCL	2885; 6714; 3265; 2534; 7414	33	33
5.4534e-05	0.000136828	Immune System	Reactome	R-HSA-168256	HSPA5; SRC; JUN; HRAS; RPS27A; SMAD3; CTNNB1; AKT1; IKBKG; CLTC; IKBKE; ABL1; SMARCA4; XRCC6; YWHAZ; FYN; HSP90AB1; MAPK1; PIK3R1; EEF1A1; NFKB1; LYN; GSN; DHX9; HSPA8; DDX3X; TRAF6; VCL; PRKDC; NCK1; TUBB; UBA52; GRB2; PRKACA; UBB; UBC; HSP90AA1; ACTB; ILF2; LCK; EIF4A3; EIF4A2	207; 1660; 2534; 4790; 2934; 7314; 1974; 6233; 2547; 3309; 8517; 6714; 2885; 7316; 3265; 3326; 4088; 4690; 5594; 7534; 3608; 1654; 203068; 6597; 3932; 7311; 7189; 3320; 3725; 9641; 25; 1915; 5566; 9775; 3312; 1499; 60; 1213; 5591; 4067; 5295; 7414	1840	1827
5.67745e-05	0.000140633	Constitutive Signaling by NOTCH1 PEST Domain Mutants	Reactome	R-HSA-2644606	SNW1; RPS27A; UBA52; UBB; UBC; MYC	22938; 6233; 7316; 7311; 4609; 7314	54	54
5.67745e-05	0.000140633	Signaling by NOTCH1 PEST Domain Mutants in Cancer	Reactome	R-HSA-2644602	SNW1; RPS27A; UBA52; UBB; UBC; MYC	22938; 6233; 7316; 7311; 4609; 7314	54	54
5.67745e-05	0.000140633	Constitutive Signaling by NOTCH1 HD+PEST Domain Mutants	Reactome	R-HSA-2894862	SNW1; RPS27A; UBA52; UBB; UBC; MYC	22938; 6233; 7316; 7311; 4609; 7314	54	54
5.67745e-05	0.000140633	Signaling by NOTCH1 HD+PEST Domain Mutants in Cancer	Reactome	R-HSA-2894858	SNW1; RPS27A; UBA52; UBB; UBC; MYC	22938; 6233; 7316; 7311; 4609; 7314	54	54
5.67745e-05	0.000140633	Signaling by NOTCH1 in Cancer	Reactome	R-HSA-2644603	SNW1; RPS27A; UBA52; UBB; UBC; MYC	22938; 7316; 7311; 4609; 7314; 6233	54	54
6.44639e-05	0.000159274	Regulation of signaling by CBL	Reactome	R-HSA-912631	LYN; GRB2; FYN; PIK3R1	4067; 5295; 2534; 2885	18	18
6.59984e-05	0.000162376	GRB2 events in EGFR signaling	Reactome	R-HSA-179812	HRAS; GRB2; EGFR	3265; 2885; 1956	7	7
6.60539e-05	0.000162376	Influenza A - Homo sapiens (human)	KEGG	path:hsa05164	PRKCA; HSPA8; JUN; SLC25A6; AKT1; MAPK1; PIK3R1; IKBKE; NFKB1; ACTB	60; 3725; 5295; 4790; 207; 3312; 293; 9641; 5578; 5594	173	173
6.99393e-05	0.000171493	Signaling by Hedgehog	Reactome	R-HSA-5358351	RPS27A; UBC; UBA52; PRKACA; UBB; ARRB1; ARRB2	409; 5566; 7316; 7311; 408; 7314; 6233	82	81
7.79595e-05	0.000190677	Senescence-Associated Secretory Phenotype (SASP)	Reactome	R-HSA-2559582	RPS27A; JUN; UBA52; CDK2; MAPK1; UBB; UBC; NFKB1	3725; 1017; 5594; 7314; 4790; 7311; 7316; 6233	112	111
8.08562e-05	0.000195789	HSP90 chaperone cycle for steroid hormone receptors (SHR)	Reactome	R-HSA-3371497	HSP90AB1; HSP90AA1; NR3C1; HSPA8	3320; 3326; 3312; 2908	19	19
8.08562e-05	0.000195789	VEGFR2 mediated cell proliferation	Reactome	R-HSA-5218921	PRKCA; SRC; HRAS; RASA1	6714; 5921; 3265; 5578	19	19
8.08562e-05	0.000195789	Asymmetric localization of PCP proteins	Reactome	R-HSA-4608870	UBA52; RPS27A; UBB; UBC	7316; 7311; 7314; 6233	19	19
8.08562e-05	0.000195789	ER Quality Control Compartment (ERQC)	Reactome	R-HSA-901032	UBA52; RPS27A; UBB; UBC	7316; 7311; 7314; 6233	20	19
8.16289e-05	0.000196679	Metalloprotease DUBs	Reactome	R-HSA-5689901	BRCA1; UBA52; RPS27A; UBB; UBC	672; 7316; 7311; 7314; 6233	36	36
8.16289e-05	0.000196679	HSF1-dependent transactivation	Reactome	R-HSA-3371571	HSP90AB1; HSP90AA1; HSPA8; UBB; HSPB1	3312; 7314; 3320; 3315; 3326	36	36
8.53623e-05	0.000204659	mRNA 3,-end processing	Reactome	R-HSA-72187	SRSF1; SRSF2; U2AF1; U2AF2; NUDT21; EIF4A3	6426; 11338; 7307; 11051; 9775; 6427	58	58
8.53623e-05	0.000204659	Signaling by BRAF and RAF fusions	Reactome	R-HSA-6802952	SRC; HRAS; VCL; MAPK1; ARRB2; ARRB1	7414; 6714; 5594; 409; 408; 3265	58	58
9.34308e-05	0.000221812	DNA Replication Pre-Initiation	Reactome	R-HSA-69002	CDK2; RPS27A; UBA52; UBB; UBC	1017; 7316; 7311; 7314; 6233	37	37
9.34308e-05	0.000221812	M/G1 Transition	Reactome	R-HSA-68874	CDK2; RPS27A; UBA52; UBB; UBC	1017; 7316; 7311; 7314; 6233	37	37
9.34308e-05	0.000221812	Thyroid cancer - Homo sapiens (human)	KEGG	path:hsa05216	CTNNB1; MYC; MAPK1; TP53; HRAS	4609; 3265; 1499; 5594; 7157	37	37
9.34308e-05	0.000221812	RHO GTPases Activate WASPs and WAVEs	Reactome	R-HSA-5663213	ABL1; GRB2; ACTB; MAPK1; NCK1	5594; 4690; 25; 2885; 60	37	37
9.40468e-05	0.00022273	E3 ubiquitin ligases ubiquitinate target proteins	Reactome	R-HSA-8866654	PCNA; RPS27A; PRKDC; UBA52; UBB; UBC	5591; 5111; 7316; 7311; 7314; 6233	59	59
0.000100083	0.000234735	Signaling by NTRK2 (TRKB)	Reactome	R-HSA-9006115	SRC; HRAS; GRB2; FYN	6714; 2885; 2534; 3265	20	20
0.000100083	0.000234735	Assembly of the pre-replicative complex	Reactome	R-HSA-68867	UBA52; RPS27A; UBB; UBC	7311; 7314; 6233; 7316	20	20
0.000100083	0.000234735	Regulation of expression of SLITs and ROBOs	Reactome	R-HSA-9010553	UBA52; RPS27A; UBB; UBC	7316; 7311; 7314; 6233	20	20
0.000100083	0.000234735	Hedgehog ligand biogenesis	Reactome	R-HSA-5358346	UBA52; RPS27A; UBB; UBC	7316; 7314; 6233; 7311	20	20
0.000104508	0.000243614	ESR-mediated signaling	Reactome	R-HSA-8939211	MOV10; ESR1; SP1; JUN; HSP90AB1; DDX5; POLR2A; HSP90AA1; MYC	3725; 5430; 6667; 3326; 4343; 2099; 1655; 4609; 3320	150	148
0.000104621	0.000243614	SHC1 events in EGFR signaling	Reactome	R-HSA-180336	HRAS; GRB2; EGFR	3265; 1956; 2885	8	8
0.000104621	0.000243614	EPH-ephrin mediated repulsion of cells	Reactome	R-HSA-3928665	SRC; LYN; FYN	4067; 6714; 2534	8	8
0.00011992	0.000277906	Apoptosis	Reactome	R-HSA-109581	YWHAZ; TP53; VIM; CTNNB1; AKT1; APC; YWHAG; GSN	207; 7157; 7532; 2934; 324; 1499; 7431; 7534	118	118
0.00011992	0.000277906	Sphingolipid signaling pathway - Homo sapiens (human)	KEGG	path:hsa04071	TP53; PRKCA; HRAS; FYN; AKT1; MAPK1; PIK3R1; NFKB1	5295; 4790; 3265; 207; 5578; 5594; 2534; 7157	118	118
0.000120931	0.000279581	Translesion synthesis by Y family DNA polymerases bypasses lesions on DNA template	Reactome	R-HSA-110313	PCNA; UBA52; RPS27A; UBB; UBC	5111; 7316; 7311; 7314; 6233	39	39
0.000122424	0.000281026	downregulated of mta-3 in er-negative breast tumors	BioCarta	mta3pathway	TUBA1A; HSPB1; GAPDH; ESR1	2099; 7846; 3315; 2597	21	21
0.000122424	0.000281026	Regulation of FZD by ubiquitination	Reactome	R-HSA-4641263	UBA52; RPS27A; UBB; UBC	7316; 7311; 7314; 6233	21	21
0.000122424	0.000281026	Oxygen-dependent proline hydroxylation of Hypoxia-inducible Factor Alpha	Reactome	R-HSA-1234176	UBA52; RPS27A; UBB; UBC	7316; 7314; 6233; 7311	21	21
0.000127419	0.000291801	Signaling by NTRKs	Reactome	R-HSA-166520	SRC; CLTC; GRB2; HRAS; FYN; MAPK1; PIK3R1	3265; 2534; 5594; 6714; 5295; 2885; 1213	89	89
0.000136813	0.000312577	inactivation of gsk3 by akt causes accumulation of b-catenin in alveolar macrophages	BioCarta	gsk3pathway	CTNNB1; AKT1; IKBKG; CSNK2A1; PIK3R1	207; 1499; 8517; 1457; 5295	40	40
0.000141557	0.000322658	HIV Life Cycle	Reactome	R-HSA-162587	TSG101; SSRP1; RPS27A; NUP153; UBA52; POLR2A; UBB; UBC; XRCC6	7251; 9972; 2547; 5430; 7311; 7314; 6749; 7316; 6233	156	154
0.000142881	0.000324912	Programmed Cell Death	Reactome	R-HSA-5357801	YWHAZ; TP53; VIM; CTNNB1; AKT1; APC; YWHAG; GSN	207; 7157; 7532; 2934; 324; 1499; 7431; 7534	121	121
0.000148169	0.000331502	CD28 dependent PI3K/Akt signaling	Reactome	R-HSA-389357	AKT1; FYN; LCK; PIK3R1	207; 3932; 2534; 5295	22	22
0.000148169	0.000331502	SHC1 events in ERBB2 signaling	Reactome	R-HSA-1250196	PRKCA; HRAS; GRB2; EGFR	5578; 3265; 1956; 2885	22	22
0.000148169	0.000331502	Signal transduction by L1	Reactome	R-HSA-445144	MAPK1; EGFR; CSNK2A2; CSNK2A1	5594; 1956; 1457; 1459	22	22
0.000148169	0.000331502	hypoxia and p53 in the cardiovascular system	BioCarta	p53hypoxiapathway	AKT1; MDM2; TP53; HSP90AA1	7157; 207; 3320; 4193	22	22
0.000148169	0.000331502	NOTCH2 Activation and Transmission of Signal to the Nucleus	Reactome	R-HSA-2979096	UBA52; RPS27A; UBB; UBC	7316; 7311; 7314; 6233	22	22
0.000148169	0.000331502	Pink/Parkin Mediated Mitophagy	Reactome	R-HSA-5205685	UBA52; RPS27A; UBB; UBC	7316; 7311; 7314; 6233	22	22
0.000148169	0.000331502	Autodegradation of Cdh1 by Cdh1:APC/C	Reactome	R-HSA-174084	UBA52; RPS27A; UBB; UBC	7316; 7311; 7314; 6233	22	22
0.000160114	0.000357404	Platelet activation - Homo sapiens (human)	KEGG	path:hsa04611	SRC; FYN; AKT1; MAPK1; PRKACA; PIK3R1; ACTB; LYN	6714; 60; 5295; 207; 5566; 5594; 4067; 2534	123	123
0.000177612	0.000392849	how progesterone initiates the oocyte maturation	BioCarta	mprpathway	CDK1; HRAS; MAPK1; SRC	983; 5594; 6714; 3265	23	23
0.000177612	0.000392849	Regulation of Hypoxia-inducible Factor (HIF) by oxygen	Reactome	R-HSA-1234174	UBA52; RPS27A; UBB; UBC	7311; 7316; 7314; 6233	23	23
0.000177612	0.000392849	Cellular response to hypoxia	Reactome	R-HSA-2262749	UBA52; RPS27A; UBB; UBC	7311; 7316; 7314; 6233	23	23
0.000177612	0.000392849	APC/C:Cdc20 mediated degradation of Securin	Reactome	R-HSA-174154	UBA52; RPS27A; UBB; UBC	7316; 7311; 7314; 6233	23	23
0.000191749	0.000422195	Cleavage of Growing Transcript in the Termination Region	Reactome	R-HSA-109688	SRSF1; SRSF2; U2AF1; U2AF2; NUDT21; EIF4A3	6426; 11338; 7307; 11051; 9775; 6427	67	67
0.000191749	0.000422195	RNA Polymerase II Transcription Termination	Reactome	R-HSA-73856	SRSF1; SRSF2; U2AF1; U2AF2; NUDT21; EIF4A3	6426; 11338; 7307; 11051; 9775; 6427	67	67
0.000194151	0.000426518	Hedgehog ,off, state	Reactome	R-HSA-5610787	UBA52; RPS27A; PRKACA; UBB; UBC	5566; 7316; 7311; 7314; 6233	44	43
0.000208142	0.00045417	Epithelial cell signaling in Helicobacter pylori infection - Homo sapiens (human)	KEGG	path:hsa05120	SRC; JUN; EGFR; IKBKG; NFKB1; LYN	3725; 1956; 4790; 6714; 8517; 4067	68	68
0.000208142	0.00045417	HDR through Homologous Recombination (HRR)	Reactome	R-HSA-5685942	PCNA; BRCA1; RPS27A; UBA52; UBB; UBC	5111; 7316; 7311; 672; 7314; 6233	69	68
0.000208142	0.00045417	Gap-filling DNA repair synthesis and ligation in TC-NER	Reactome	R-HSA-6782210	PCNA; RPS27A; UBA52; POLR2A; UBB; UBC	5430; 5111; 7316; 7311; 7314; 6233	68	68
0.000211055	0.000459493	Calnexin/calreticulin cycle	Reactome	R-HSA-901042	UBA52; RPS27A; UBB; UBC	7316; 7311; 7314; 6233	25	24
0.000220065	0.000476972	Signaling by FGFR3 fusions in cancer	Reactome	R-HSA-8853334	HRAS; GRB2; PIK3R1	5295; 3265; 2885	10	10
0.000220065	0.000476972	GP1b-IX-V activation signalling	Reactome	R-HSA-430116	YWHAZ; SRC; PIK3R1	7534; 5295; 6714	10	10
0.00022562	0.000484683	Renal cell carcinoma - Homo sapiens (human)	KEGG	path:hsa05211	HRAS; JUN; AKT1; GRB2; PIK3R1; MAPK1	3725; 5295; 3265; 2885; 207; 5594	69	69
0.00022562	0.000484683	Dual incision in TC-NER	Reactome	R-HSA-6782135	PCNA; RPS27A; UBA52; POLR2A; UBB; UBC	5430; 5111; 7316; 7311; 7314; 6233	69	69
0.00022562	0.000484683	Loss of Nlp from mitotic centrosomes	Reactome	R-HSA-380259	TUBA1A; TUBB; CDK1; PRKACA; HSP90AA1; YWHAG	7532; 3320; 5566; 983; 203068; 7846	69	69
0.00022562	0.000484683	Loss of proteins required for interphase microtubule organization from the centrosome	Reactome	R-HSA-380284	TUBA1A; TUBB; CDK1; PRKACA; HSP90AA1; YWHAG	7532; 3320; 5566; 983; 203068; 7846	69	69
0.000232783	0.000498967	Processing of DNA double-strand break ends	Reactome	R-HSA-5693607	UBE2I; BRCA1; RPS27A; UBA52; CDK2; UBB; UBC	1017; 7316; 7329; 7311; 7314; 672; 6233	99	98
0.000241483	0.000516476	DAP12 interactions	Reactome	R-HSA-2172127	HRAS; GRB2; FYN; LCK; PIK3R1	2534; 2885; 5295; 3265; 3932	45	45
0.000248805	0.000530967	skeletal muscle hypertrophy is regulated via akt-mtor pathway	BioCarta	igf1mtorpathway	PABPC1; AKT1; PIK3R1; RPS6	207; 6194; 26986; 5295	25	25
0.000268204	0.000571109	Switching of origins to a post-replicative state	Reactome	R-HSA-69052	UBA52; RPS27A; CDK2; UBB; UBC	7316; 7311; 1017; 7314; 6233	46	46
0.000285078	0.00060439	TCR signaling	Reactome	R-HSA-202403	NCK1; TRAF6; IKBKG; PIK3R1; NFKB1; LCK	3932; 7189; 4690; 8517; 4790; 5295	72	72
0.000285078	0.00060439	AURKA Activation by TPX2	Reactome	R-HSA-8854518	TUBA1A; TUBB; CDK1; PRKACA; HSP90AA1; YWHAG	7532; 5566; 3320; 983; 203068; 7846	72	72
0.000291176	0.000614634	TRAF6 mediated NF-kB activation	Reactome	R-HSA-933542	NFKB1; IKBKG; TRAF6; DHX9	4790; 7189; 8517; 1660	26	26
0.000291176	0.000614634	APC-Cdc20 mediated degradation of Nek2A	Reactome	R-HSA-179409	UBA52; RPS27A; UBB; UBC	7316; 7311; 7314; 6233	26	26
0.000297973	0.000627377	L1CAM interactions	Reactome	R-HSA-373760	SRC; HSPA8; EGFR; MAPK1; CLTC; CSNK2A2; CSNK2A1	1956; 1457; 5594; 3312; 6714; 1459; 1213	103	102
0.000299656	0.000627377	Regulation of actin cytoskeleton - Homo sapiens (human)	KEGG	path:hsa04810	MYH10; SRC; VCL; HRAS; EGFR; MAPK1; PIK3R1; APC; ACTB; GSN	4628; 2934; 6714; 60; 5295; 3265; 324; 1956; 7414; 5594	208	208
0.000299797	0.000627377	Signaling by FGFR4 in disease	Reactome	R-HSA-5655291	HRAS; GRB2; PIK3R1	5295; 3265; 2885	11	11
0.000299797	0.000627377	insulin signaling pathway	BioCarta	insulinpathway	HRAS; GRB2; PIK3R1	5295; 3265; 2885	11	11
0.00030068	0.000627871	Cell Cycle Checkpoints	Reactome	R-HSA-69620	BRCA1; YWHAZ; TP53; RPS27A; UBA52; CDK1; CDK2; UBB; UBC; MDM2; YWHAG	983; 4193; 1017; 7316; 7157; 7532; 7311; 7314; 672; 7534; 6233	249	248
0.000307415	0.000640558	Transport of Mature mRNA derived from an Intron-Containing Transcript	Reactome	R-HSA-159236	SRSF1; SRSF2; U2AF1; U2AF2; NUP153; EIF4A3	11338; 9775; 9972; 6426; 7307; 6427	73	73
0.000316368	0.000657801	S Phase	Reactome	R-HSA-69242	PCNA; RPS27A; UBA52; AKT1; CDK2; UBB; UBC	207; 1017; 7311; 7314; 5111; 7316; 6233	103	103
0.000328321	0.000681196	agrin in postsynaptic differentiation	BioCarta	agrpathway	SRC; EGFR; MAPK1; JUN; SP1	3725; 6714; 1956; 6667; 5594	48	48
0.000331102	0.000685502	Bacterial invasion of epithelial cells - Homo sapiens (human)	KEGG	path:hsa05100	SRC; PIK3R1; VCL; CTNNB1; CLTC; ACTB	5295; 6714; 60; 1213; 7414; 1499	74	74
0.000338484	0.000697809	corticosteroids and cardioprotection	BioCarta	gcrpathway	AKT1; NR3C1; PIK3R1; HSP90AA1	207; 2908; 3320; 5295	27	27
0.000338484	0.000697809	APC/C:Cdh1 mediated degradation of Cdc20 and other APC/C:Cdh1 targeted proteins in late mitosis/early G1	Reactome	R-HSA-174178	UBA52; RPS27A; UBB; UBC	7311; 7316; 7314; 6233	27	27
0.000356196	0.000732768	Synthesis of DNA	Reactome	R-HSA-69239	PCNA; RPS27A; UBA52; CDK2; UBB; UBC	1017; 5111; 7316; 7311; 7314; 6233	75	75
0.000361951	0.000743032	DNA Damage Bypass	Reactome	R-HSA-73893	PCNA; UBA52; RPS27A; UBB; UBC	5111; 7316; 7311; 7314; 6233	49	49
0.00036806	0.000753979	Axon guidance - Homo sapiens (human)	KEGG	path:hsa04360	SRC; NCK1; PRKCA; HRAS; FYN; MAPK1; PIK3R1; ABL1; RASA1	25; 6714; 4690; 5295; 3265; 5921; 2534; 5578; 5594	175	175
0.000382755	0.000782432	Signaling by NTRK1 (TRKA)	Reactome	R-HSA-187037	SRC; PIK3R1; HRAS; GRB2; CLTC; MAPK1	6714; 3265; 2885; 5594; 1213; 5295	76	76
0.000396042	0.00080116	Condensation of Prometaphase Chromosomes	Reactome	R-HSA-2514853	CDK1; CSNK2A2; CSNK2A1	983; 1459; 1457	12	12
0.000396042	0.00080116	carm1 and regulation of the estrogen receptor	BioCarta	carmerpathway	NR3C1; POLR2A; ESR1	2099; 2908; 5430	12	12
0.000396042	0.00080116	CD28 dependent Vav1 pathway	Reactome	R-HSA-389359	GRB2; FYN; LCK	2534; 2885; 3932	12	12
0.000396042	0.00080116	map kinase inactivation of smrt corepressor	BioCarta	smrtepathway	HRAS; GRB2; EGFR	3265; 1956; 2885	12	12
0.000396042	0.00080116	Receptor Mediated Mitophagy	Reactome	R-HSA-8934903	SRC; CSNK2A2; CSNK2A1	6714; 1459; 1457	12	12
0.000406718	0.000821046	Late Phase of HIV Life Cycle	Reactome	R-HSA-162599	TSG101; SSRP1; RPS27A; NUP153; UBA52; POLR2A; UBB; UBC	7251; 5430; 9972; 7311; 7314; 6749; 7316; 6233	143	141
0.000436957	0.000878437	Downstream TCR signaling	Reactome	R-HSA-202424	NFKB1; PIK3R1; LCK; TRAF6; IKBKG	3932; 4790; 8517; 7189; 5295	51	51
0.000436957	0.000878437	TP53 Regulates Transcription of Cell Cycle Genes	Reactome	R-HSA-6791312	PCNA; CDK1; CDK2; NPM1; TP53	7157; 983; 5111; 1017; 4869	51	51
0.00046837	0.000939644	Vpr-mediated induction of apoptosis by mitochondrial outer membrane permeabilization	Reactome	R-HSA-180897	SLC25A6; SLC25A5	292; 293	3	3
0.000471816	0.000944604	Recruitment of NuMA to mitotic centrosomes	Reactome	R-HSA-380320	TUBA1A; TUBB; CDK1; PRKACA; HSP90AA1; YWHAG	3320; 5566; 983; 7532; 203068; 7846	79	79
0.000490431	0.000979854	Phospholipase D signaling pathway - Homo sapiens (human)	KEGG	path:hsa04072	PRKCA; FYN; HRAS; EGFR; AKT1; GRB2; PIK3R1; MAPK1	5295; 3265; 207; 2885; 1956; 5578; 5594; 2534	146	145
0.000504835	0.0010004	DNA Replication	Reactome	R-HSA-69306	PCNA; RPS27A; UBA52; CDK2; UBB; UBC	1017; 5111; 7316; 7311; 7314; 6233	80	80
0.000504835	0.0010004	Protein ubiquitination	Reactome	R-HSA-8852135	PCNA; RPS27A; PRKDC; UBA52; UBB; UBC	5591; 5111; 7316; 7311; 7314; 6233	80	80
0.000504835	0.0010004	Recruitment of mitotic centrosome proteins and complexes	Reactome	R-HSA-380270	TUBA1A; TUBB; CDK1; PRKACA; HSP90AA1; YWHAG	7532; 3320; 5566; 983; 203068; 7846	80	80
0.000504835	0.0010004	Centrosome maturation	Reactome	R-HSA-380287	TUBA1A; TUBB; CDK1; PRKACA; HSP90AA1; YWHAG	7532; 3320; 5566; 983; 203068; 7846	80	80
0.000510108	0.0010047	multiple antiapoptotic pathways from igf-1r signaling lead to bad phosphorylation	BioCarta	igf1rpathway	HRAS; GRB2; PIK3R1	5295; 3265; 2885	13	13
0.000510108	0.0010047	rb tumor suppressor/checkpoint signaling in response to dna damage	BioCarta	rbpathway	CDK1; CDK2; TP53	7157; 983; 1017	13	13
0.000510108	0.0010047	Chk1/Chk2(Cds1) mediated inactivation of Cyclin B:Cdk1 complex	Reactome	R-HSA-75035	YWHAZ; CDK1; YWHAG	7534; 7532; 983	13	13
0.000513265	0.00100683	mcalpain and friends in cell motility	BioCarta	mcalpainpathway	GRB2; HRAS; MAPK1; EGFR	3265; 1956; 5594; 2885	30	30
0.000513265	0.00100683	Activation of BH3-only proteins	Reactome	R-HSA-114452	YWHAZ; AKT1; TP53; YWHAG	7157; 7532; 207; 7534	30	30
0.000523122	0.00102409	hiv-1 nef: negative effector of fas and tnf	BioCarta	hivnefpathway	RASA1; MDM2; GSN; PARP1; PRKDC	5591; 2934; 4193; 142; 5921	53	53
0.000526437	0.00102851	Cholinergic synapse - Homo sapiens (human)	KEGG	path:hsa04725	PRKCA; HRAS; FYN; AKT1; MAPK1; PRKACA; PIK3R1	207; 3265; 5295; 5566; 5578; 5594; 2534	112	112
0.000539627	0.00105006	Transcription-Coupled Nucleotide Excision Repair (TC-NER)	Reactome	R-HSA-6781827	PCNA; RPS27A; UBA52; POLR2A; UBB; UBC	5430; 5111; 7316; 7311; 7314; 6233	81	81
0.000539627	0.00105006	Regulation of HSF1-mediated heat shock response	Reactome	R-HSA-3371453	HSPA5; HSPB1; HSPA8; NUP153; MAPK1; UBB	9972; 7314; 3315; 5594; 3309; 3312	81	81
0.000576256	0.00111909	Transport of Mature Transcript to Cytoplasm	Reactome	R-HSA-72202	SRSF1; SRSF2; U2AF1; U2AF2; NUP153; EIF4A3	11338; 9775; 9972; 6426; 7307; 6427	82	82
0.00058357	0.00113103	Synthesis of active ubiquitin: roles of E1 and E2 enzymes	Reactome	R-HSA-8866652	UBA52; RPS27A; UBB; UBC	7316; 7311; 7314; 6233	31	31
0.000643246	0.00124173	il 2 signaling pathway	BioCarta	il2pathway	HRAS; GRB2; LCK	3265; 2885; 3932	14	14
0.000643246	0.00124173	phosphorylation of mek1 by cdk5/p35 down regulates the map kinase pathway	BioCarta	cdk5pathway	GRB2; HRAS; MAPK1	5594; 3265; 2885	14	14
0.00066045	0.00126989	TAK1 activates NFkB by phosphorylation and activation of IKKs complex	Reactome	R-HSA-445989	NFKB1; IKBKG; TRAF6; DHX9	4790; 7189; 8517; 1660	32	32
0.00066045	0.00126989	Thrombin signalling through proteinase activated receptors (PARs)	Reactome	R-HSA-456926	SRC; MAPK1; ARRB2; ARRB1	6714; 409; 5594; 408	32	32
0.000670268	0.00128623	Oxytocin signaling pathway - Homo sapiens (human)	KEGG	path:hsa04921	SRC; PRKCA; EGFR; HRAS; JUN; MAPK1; PRKACA; ACTB	60; 3725; 3265; 6714; 1956; 5566; 5578; 5594	153	152
0.000675547	0.0012938	DDX58/IFIH1-mediated induction of interferon-alpha/beta	Reactome	R-HSA-168928	NFKB1; DHX9; IKBKG; TRAF6; IKBKE	4790; 9641; 7189; 8517; 1660	56	56
0.000699816	0.00133764	Hippo signaling pathway - Homo sapiens (human)	KEGG	path:hsa04390	YWHAZ; SMAD2; YWHAG; CTNNB1; APC; MYC; SMAD3; ACTB	4609; 60; 324; 7532; 7534; 1499; 4087; 4088	154	153
0.000721945	0.00137723	Hemostasis	Reactome	R-HSA-109582	YWHAZ; SRC; TP53; HSPA5; PRKCA; VCL; HRAS; FYN; AKT1; CDK2; GRB2; ARRB2; PIK3R1; ARRB1; ABL1; MAPK1; LYN; LCK; PRKACA	5578; 408; 6714; 2885; 3265; 2534; 3932; 409; 1017; 7157; 25; 207; 4067; 5594; 3309; 5566; 5295; 7414; 7534	668	667
0.000733068	0.00139297	mapkinase signaling pathway	BioCarta	mapkpathway	SP1; HRAS; MAPK1; JUN; MYC	3725; 3265; 6667; 5594; 4609	57	57
0.000733068	0.00139297	Formation of TC-NER Pre-Incision Complex	Reactome	R-HSA-6781823	UBA52; RPS27A; POLR2A; UBB; UBC	5430; 7316; 7311; 7314; 6233	57	57
0.000744239	0.00140595	GPVI-mediated activation cascade	Reactome	R-HSA-114604	LYN; FYN; LCK; PIK3R1	4067; 2534; 3932; 5295	33	33
0.000744239	0.00140595	Signaling by NOTCH2	Reactome	R-HSA-1980145	UBA52; RPS27A; UBB; UBC	6233; 7316; 7311; 7314	33	33
0.000744239	0.00140595	N-glycan trimming in the ER and Calnexin/Calreticulin cycle	Reactome	R-HSA-532668	UBA52; RPS27A; UBB; UBC	7316; 7311; 7314; 6233	34	33
0.000748047	0.0014104	Signaling by Nuclear Receptors	Reactome	R-HSA-9006931	MOV10; ESR1; SP1; JUN; HSP90AB1; DDX5; POLR2A; HSP90AA1; MYC	3725; 5430; 6667; 3326; 4343; 2099; 1655; 4609; 3320	195	193
0.000794172	0.00148474	NCAM signaling for neurite out-growth	Reactome	R-HSA-375165	SRC; HRAS; MAPK1; FYN; GRB2	6714; 3265; 2534; 5594; 2885	58	58
0.000796654	0.00148474	pten dependent cell cycle arrest and apoptosis	BioCarta	ptenpathway	AKT1; GRB2; PIK3R1	207; 2885; 5295	15	15
0.000796654	0.00148474	WNT5A-dependent internalization of FZD4	Reactome	R-HSA-5099900	PRKCA; ARRB2; CLTC	409; 5578; 1213	15	15
0.000796654	0.00148474	il-7 signal transduction	BioCarta	il7pathway	FYN; LCK; PIK3R1	2534; 5295; 3932	15	15
0.000796654	0.00148474	DCC mediated attractive signaling	Reactome	R-HSA-418885	SRC; FYN; NCK1	2534; 6714; 4690	15	15
0.000796654	0.00148474	Activation of BAD and translocation to mitochondria	Reactome	R-HSA-111447	YWHAZ; AKT1; YWHAG	7534; 7532; 207	15	15
0.00081787	0.00152136	Adaptive Immune System	Reactome	R-HSA-1280218	YWHAZ; SRC; LYN; NCK1; TRAF6; HRAS; RPS27A; FYN; UBB; PIK3R1; AKT1; UBA52; GRB2; PRKACA; IKBKG; CLTC; UBC; NFKB1; HSPA5; LCK	207; 6714; 2885; 7316; 2534; 4690; 3932; 7311; 7189; 1213; 4790; 3265; 7314; 6233; 3309; 5566; 5295; 4067; 8517; 7534	732	728
0.000889763	0.00165193	Longevity regulating pathway - Homo sapiens (human)	KEGG	path:hsa04211	TP53; HRAS; AKT1; PRKACA; PIK3R1; NFKB1	5295; 4790; 3265; 207; 5566; 7157	89	89
0.000899933	0.00166762	Fcgamma receptor (FCGR) dependent phagocytosis	Reactome	R-HSA-2029480	NCK1; GRB2; HSP90AB1; MAPK1; PIK3R1; ABL1; HSP90AA1; ACTB	3320; 5594; 3326; 4690; 5295; 60; 25; 2885	159	159
0.000928985	0.00171818	Activated NTRK2 signals through FYN	Reactome	R-HSA-9032500	SRC; FYN	2534; 6714	4	4
0.000933888	0.00172069	RET signaling	Reactome	R-HSA-8853659	PRKCA; SRC; GRB2; PRKACA	5578; 6714; 5566; 2885	35	35
0.000933888	0.00172069	Prion diseases - Homo sapiens (human)	KEGG	path:hsa05020	FYN; MAPK1; PRKACA; HSPA5	5594; 5566; 2534; 3309	35	35
0.000943552	0.00173521	Fc gamma R-mediated phagocytosis - Homo sapiens (human)	KEGG	path:hsa04666	PRKCA; AKT1; MAPK1; PIK3R1; LYN; GSN	5295; 2934; 207; 5578; 5594; 4067	91	90
0.000971473	0.00177646	PI3K events in ERBB2 signaling	Reactome	R-HSA-1963642	GRB2; EGFR; PIK3R1	1956; 2885; 5295	16	16
0.000971473	0.00177646	GRB2 events in ERBB2 signaling	Reactome	R-HSA-1963640	HRAS; GRB2; EGFR	2885; 3265; 1956	16	16
0.000971473	0.00177646	Sema3A PAK dependent Axon repulsion	Reactome	R-HSA-399954	HSP90AB1; HSP90AA1; FYN	3320; 3326; 2534	16	16
0.00104042	0.00189896	roles of arrestin dependent recruitment of src kinases in gpcr signaling	BioCarta	barrestinsrcpathway	SRC; HRAS; MAPK1; ARRB1	6714; 3265; 5594; 408	36	36
0.00107722	0.00196244	Longevity regulating pathway - multiple species - Homo sapiens (human)	KEGG	path:hsa04213	AKT1; HRAS; HSPA8; PRKACA; PIK3R1	3312; 5295; 5566; 3265; 207	62	62
0.00111004	0.00201844	Signaling by the B Cell Receptor (BCR)	Reactome	R-HSA-983705	NCK1; HRAS; GRB2; IKBKG; PIK3R1; NFKB1; LYN	4067; 3265; 4790; 4690; 5295; 8517; 2885	127	127
0.00115836	0.00210236	Influenza Infection	Reactome	R-HSA-168254	NUP153; HSP90AA1; POLR2A; SLC25A6; CLTC	1213; 293; 5430; 9972; 3320	63	63
0.0011688	0.00211341	aspirin blocks signaling pathway involved in platelet activation	BioCarta	sppapathway	PRKCA; HRAS; MAPK1	5594; 3265; 5578	17	17
0.0011688	0.00211341	role of nicotinic acetylcholine receptors in the regulation of apoptosis	BioCarta	achpathway	SRC; PIK3R1; AKT1	6714; 207; 5295	17	17
0.00118557	0.00213976	Rap1 signaling pathway - Homo sapiens (human)	KEGG	path:hsa04015	SRC; PRKCA; HRAS; EGFR; CTNNB1; AKT1; MAPK1; PIK3R1; ACTB	6714; 60; 207; 5295; 3265; 5578; 1956; 5594; 1499	206	206
0.00125105	0.00225374	Amoebiasis - Homo sapiens (human)	KEGG	path:hsa05146	HSPB1; PRKCA; VCL; PRKACA; PIK3R1; NFKB1	5295; 4790; 3315; 7414; 5566; 5578	96	95
0.00127858	0.00229908	Apoptotic cleavage of cellular proteins	Reactome	R-HSA-111465	CTNNB1; APC; GSN; VIM	1499; 7431; 2934; 324	38	38
0.00128379	0.00230417	NOD-like receptor signaling pathway - Homo sapiens (human)	KEGG	path:hsa04621	TRAF6; JUN; HSP90AA1; HSP90AB1; MAPK1; IKBKG; IKBKE; NFKB1	7189; 3725; 4790; 3326; 8517; 9641; 3320; 5594	168	168
0.0013208	0.00236623	p75 NTR receptor-mediated signalling	Reactome	R-HSA-193704	TRAF6; RPS27A; UBA52; UBB; UBC; NFKB1	4790; 7311; 7314; 7189; 7316; 6233	99	96
0.00138957	0.00246684	Natural killer cell mediated cytotoxicity - Homo sapiens (human)	KEGG	path:hsa04650	PRKCA; GRB2; HRAS; FYN; MAPK1; PIK3R1; LCK	5295; 3265; 2885; 3932; 5578; 5594; 2534	133	132
0.00138966	0.00246684	TP53 Regulates Transcription of Genes Involved in G2 Cell Cycle Arrest	Reactome	R-HSA-6804114	PCNA; CDK1; TP53	983; 7157; 5111	18	18
0.00138966	0.00246684	Protein methylation	Reactome	R-HSA-8876725	EEF1A1; HSPA8; RPS2	1915; 3312; 6187	18	18
0.00138966	0.00246684	Signalling to RAS	Reactome	R-HSA-167044	SRC; HRAS; GRB2	2885; 6714; 3265	18	18
0.00138966	0.00246684	Tie2 Signaling	Reactome	R-HSA-210993	HRAS; GRB2; PIK3R1	5295; 3265; 2885	18	18
0.00139348	0.00246911	Anchoring of the basal body to the plasma membrane	Reactome	R-HSA-5620912	TUBA1A; TUBB; CDK1; PRKACA; HSP90AA1; YWHAG	983; 7846; 5566; 7532; 3320; 203068	97	97
0.00143734	0.00254217	RNA transport - Homo sapiens (human)	KEGG	path:hsa03013	UBE2I; PABPC1; PRMT5; NUP153; UPF1; EEF1A1; EIF4A3; EIF4A2	7329; 10419; 9972; 9775; 5976; 26986; 1915; 1974	171	171
0.00152876	0.00269895	TP53 Regulates Transcription of DNA Repair Genes	Reactome	R-HSA-6796648	BRCA1; POLR2A; SSRP1; JUN; TP53	7157; 5430; 672; 3725; 6749	70	67
0.0015355	0.00270103	pelp1 modulation of estrogen receptor activity	BioCarta	pelp1pathway	SRC; ESR1	2099; 6714	5	5
0.0015355	0.00270103	RUNX3 regulates CDKN1A transcription	Reactome	R-HSA-8941855	TP53; SMAD3	4088; 7157	5	5
0.00155245	0.00272099	CLEC7A (Dectin-1) signaling	Reactome	R-HSA-5607764	NFKB1; IKBKG; TRAF6; SRC	4790; 7189; 6714; 8517	40	40
0.00155245	0.00272099	Fanconi Anemia Pathway	Reactome	R-HSA-6783310	UBA52; RPS27A; UBB; UBC	7316; 7311; 7314; 6233	41	40
0.00163506	0.00285548	akt signaling pathway	BioCarta	aktpathway	AKT1; PIK3R1; HSP90AA1	207; 3320; 5295	19	19
0.00163506	0.00285548	CD209 (DC-SIGN) signaling	Reactome	R-HSA-5621575	NFKB1; HRAS; PRKACA	3265; 5566; 4790	19	19
0.00172134	0.00299538	Insulin signaling pathway - Homo sapiens (human)	KEGG	path:hsa04910	RPS6; GRB2; HRAS; AKT1; MAPK1; PRKACA; PIK3R1	5295; 207; 3265; 6194; 2885; 5594; 5566	137	137
0.00172134	0.00299538	Apelin signaling pathway - Homo sapiens (human)	KEGG	path:hsa04371	AKT1; HRAS; SMAD2; SMAD3; RPS6; MAPK1; PRKACA	6194; 3265; 207; 5566; 5594; 4087; 4088	137	137
0.00179452	0.00311713	Death Receptor Signalling	Reactome	R-HSA-73887	TRAF6; RPS27A; UBA52; IKBKG; UBB; UBC; NFKB1	4790; 8517; 7311; 7314; 7189; 7316; 6233	141	138
0.0018589	0.0032232	RIG-I-like receptor signaling pathway - Homo sapiens (human)	KEGG	path:hsa04622	NFKB1; DDX3X; IKBKG; TRAF6; IKBKE	7189; 9641; 4790; 1654; 8517	70	70
0.00190594	0.00328716	ras signaling pathway	BioCarta	raspathway	AKT1; HRAS; PIK3R1	207; 3265; 5295	20	20
0.00190594	0.00328716	the co-stimulatory signal during t-cell activation	BioCarta	ctla4pathway	GRB2; LCK; PIK3R1	2885; 5295; 3932	20	20
0.00190594	0.00328716	SUMOylation of transcription factors	Reactome	R-HSA-3232118	UBE2I; MDM2; TP53	7157; 7329; 4193	20	20
0.00194811	0.00335393	Estrogen-dependent gene expression	Reactome	R-HSA-9018519	MOV10; ESR1; SP1; JUN; DDX5; POLR2A; MYC	3725; 5430; 6667; 4343; 2099; 1655; 4609	142	140
0.00202863	0.00348637	Regulation of actin dynamics for phagocytic cup formation	Reactome	R-HSA-2029482	NCK1; GRB2; HSP90AB1; MAPK1; ABL1; HSP90AA1; ACTB	3320; 5594; 3326; 4690; 60; 25; 2885	141	141
0.00203603	0.0034929	Intrinsic Pathway for Apoptosis	Reactome	R-HSA-109606	YWHAZ; AKT1; TP53; YWHAG	7157; 7532; 207; 7534	43	43
0.0022032	0.00377302	nf-kb signaling pathway	BioCarta	nfkbpathway	NFKB1; IKBKG; TRAF6	7189; 8517; 4790	21	21
0.00221795	0.0037916	nfat and hypertrophy of the heart	BioCarta	nfatpathway	AKT1; HRAS; GRB2; PIK3R1	207; 3265; 2885; 5295	44	44
0.00228422	0.00387758	SMAD2/3 Phosphorylation Motif Mutants in Cancer	Reactome	R-HSA-3304356	SMAD2; SMAD3	4088; 4087	6	6
0.00228422	0.00387758	SMAD2/3 MH2 Domain Mutants in Cancer	Reactome	R-HSA-3315487	SMAD2; SMAD3	4088; 4087	6	6
0.00228422	0.00387758	Loss of Function of SMAD2/3 in Cancer	Reactome	R-HSA-3304349	SMAD2; SMAD3	4088; 4087	6	6
0.00228422	0.00387758	MET activates PI3K/AKT signaling	Reactome	R-HSA-8851907	GRB2; PIK3R1	5295; 2885	6	6
0.00235754	0.00399506	Mitotic Prometaphase	Reactome	R-HSA-68877	TUBA1A; TUBB; CSNK2A2; CDK1; PRKACA; HSP90AA1; YWHAG; CSNK2A1	983; 1457; 7846; 5566; 7532; 1459; 3320; 203068	185	185
0.00241017	0.00407714	TNF signaling pathway - Homo sapiens (human)	KEGG	path:hsa04668	JUN; AKT1; MAPK1; IKBKG; PIK3R1; NFKB1	3725; 5295; 4790; 207; 8517; 5594	108	108
0.00252767	0.00426106	Signaling by FGFR3 point mutants in cancer	Reactome	R-HSA-8853338	HRAS; GRB2; PIK3R1	3265; 2885; 5295	22	22
0.00252767	0.00426106	Signaling by FGFR3 in disease	Reactome	R-HSA-5655332	HRAS; GRB2; PIK3R1	3265; 2885; 5295	22	22
0.00261483	0.00440034	SUMOylation of RNA binding proteins	Reactome	R-HSA-4570464	UBE2I; NUP153; HNRNPC; HNRNPK	7329; 3183; 9972; 3190	46	46
0.00267156	0.00448804	Cell death signalling via NRAGE, NRIF and NADE	Reactome	R-HSA-204998	UBA52; RPS27A; UBB; TRAF6; UBC	7189; 7316; 7311; 7314; 6233	78	76
0.00283043	0.00474671	Endocrine and other factor-regulated calcium reabsorption - Homo sapiens (human)	KEGG	path:hsa04961	PRKCA; PRKACA; CLTC; ESR1	2099; 1213; 5566; 5578	47	47
0.00287487	0.00478061	mTOR signaling pathway - Homo sapiens (human)	KEGG	path:hsa04150	AKT1; PRKCA; HRAS; RPS6; GRB2; PIK3R1; MAPK1	6194; 3265; 207; 5295; 2885; 5578; 5594	151	150
0.00288018	0.00478061	Nephrin family interactions	Reactome	R-HSA-373753	FYN; NCK1; PIK3R1	2534; 4690; 5295	23	23
0.00288018	0.00478061	ctcf: first multivalent nuclear factor	BioCarta	ctcfpathway	MDM2; MYC; PIK3R1	4193; 5295; 4609	23	23
0.00288018	0.00478061	RIP-mediated NFkB activation via ZBP1	Reactome	R-HSA-1810476	NFKB1; IKBKG; DHX9	4790; 8517; 1660	23	23
0.00288018	0.00478061	growth hormone signaling pathway	BioCarta	ghpathway	PRKCA; GRB2; PIK3R1	5578; 2885; 5295	23	23
0.00288018	0.00478061	ccr3 signaling in eosinophils	BioCarta	ccr3pathway	PRKCA; HRAS; MAPK1	5578; 5594; 3265	23	23
0.00302325	0.00500952	Toxoplasmosis - Homo sapiens (human)	KEGG	path:hsa05145	TRAF6; HSPA8; AKT1; MAPK1; IKBKG; NFKB1	7189; 4790; 207; 3312; 8517; 5594	113	113
0.00317151	0.00521955	tsp-1 induced apoptosis in microvascular endothelial cell	BioCarta	tsp1pathway	JUN; FYN	2534; 3725	7	7
0.00317151	0.00521955	SOS-mediated signalling	Reactome	R-HSA-112412	HRAS; GRB2	3265; 2885	7	7
0.00317151	0.00521955	TFAP2A acts as a transcriptional repressor during retinoic acid induced cell differentiation	Reactome	R-HSA-8869496	HSPD1; NPM1	3329; 4869	7	7
0.00317151	0.00521955	Signaling by TGF-beta Receptor Complex in Cancer	Reactome	R-HSA-3304351	SMAD2; SMAD3	4088; 4087	7	7
0.00326149	0.00535855	RUNX2 regulates osteoblast differentiation	Reactome	R-HSA-8940973	ABL1; SRC; MAPK1	6714; 25; 5594	24	24
0.003328	0.0054586	Cushing,s syndrome - Homo sapiens (human)	KEGG	path:hsa04934	SP1; EGFR; CTNNB1; CDK2; MAPK1; PRKACA; APC	6667; 1499; 324; 1956; 5566; 5594; 1017	154	154
0.00367231	0.00597288	mtor signaling pathway	BioCarta	mtorpathway	AKT1; PIK3R1; RPS6	207; 6194; 5295	25	25
0.00367231	0.00597288	G0 and Early G1	Reactome	R-HSA-1538133	PCNA; CDK1; CDK2	983; 5111; 1017	25	25
0.00367231	0.00597288	Deadenylation of mRNA	Reactome	R-HSA-429947	PABPC1; EIF4A3; EIF4A2	1974; 26986; 9775	25	25
0.00367231	0.00597288	Downstream signaling of activated FGFR3	Reactome	R-HSA-5654708	HRAS; GRB2; PIK3R1	2885; 5295; 3265	25	25
0.00367231	0.00597288	RAF activation	Reactome	R-HSA-5673000	PHB; HRAS; SRC	5245; 6714; 3265	25	25
0.00376935	0.00612047	Post-translational protein modification	Reactome	R-HSA-597592	PCNA; EEF1A1; RPS27A; SMAD2; SMAD3; ARRB2; IKBKG; ARRB1; TUBA1A; HNRNPK; MYC; HNRNPC; BRCA1; HSPA8; TRAF6; PARP1; MDM2; PRKDC; UBE2I; TP53; ESR1; NUP153; CDK1; UBA52; UBB; UBC; APC; ACTB; RPS2	4193; 4087; 409; 7314; 6233; 8517; 672; 408; 7316; 7846; 4088; 324; 142; 4609; 9972; 983; 7311; 7189; 6187; 7157; 5111; 1915; 3312; 60; 5591; 3190; 3183; 7329; 2099	1383	1378
0.00381457	0.00618355	Insulin receptor signalling cascade	Reactome	R-HSA-74751	GRB2; HRAS; MAPK1; PIK3R1	5594; 3265; 2885; 5295	51	51
0.00390485	0.00631934	G2/M Checkpoints	Reactome	R-HSA-69481	YWHAZ; BRCA1; TP53; CDK1; CDK2; YWHAG	1017; 983; 7157; 7532; 7534; 672	120	119
0.00409256	0.00661211	Apoptotic execution phase	Reactome	R-HSA-75153	CTNNB1; APC; VIM; GSN	2934; 1499; 7431; 324	52	52
0.00412018	0.00664567	TGF-beta signaling pathway - Homo sapiens (human)	KEGG	path:hsa04350	SP1; MYC; MAPK1; SMAD2; SMAD3	4609; 6667; 5594; 4087; 4088	84	84
0.0041938	0.00671977	HuR (ELAVL1) binds and stabilizes mRNA	Reactome	R-HSA-450520	PRKCA; ELAVL1	1994; 5578	8	8
0.0041938	0.00671977	Nef and signal transduction	Reactome	R-HSA-164944	FYN; LCK	3932; 2534	8	8
0.0041938	0.00671977	RUNX3 regulates WNT signaling	Reactome	R-HSA-8951430	CTNNB1; MYC	4609; 1499	8	8
0.0041938	0.00671977	Binding of TCF/LEF:CTNNB1 to target gene promoters	Reactome	R-HSA-4411364	CTNNB1; MYC	4609; 1499	8	8
0.00438395	0.00701287	Influenza Life Cycle	Reactome	R-HSA-168255	NUP153; HSP90AA1; POLR2A; CLTC	1213; 5430; 9972; 3320	53	53
0.00455578	0.0072119	RUNX1 regulates transcription of genes involved in differentiation of HSCs	Reactome	R-HSA-8939236	ABL1; UBA52; RPS27A; UBB; UBC	25; 7311; 7314; 7316; 6233	88	86
0.00455578	0.0072119	TP53 Regulates Metabolic Genes	Reactome	R-HSA-5628897	YWHAZ; AKT1; TP53; YWHAG; MOV10	207; 7157; 7532; 4343; 7534	86	86
0.00455578	0.0072119	Salmonella infection - Homo sapiens (human)	KEGG	path:hsa05132	MYH10; NFKB1; ACTB; MAPK1; JUN	4628; 60; 3725; 4790; 5594	86	86
0.00456748	0.0072119	RHO GTPase Effectors	Reactome	R-HSA-195258	MYH10; YWHAZ; NCK1; SRC; CTNNB1; GRB2; ABL1; MAPK1; ACTB; YWHAG	5594; 4628; 2885; 7534; 6714; 4690; 60; 7532; 25; 1499	300	299
0.00458518	0.0072119	VEGFR2 mediated vascular permeability	Reactome	R-HSA-5218920	CTNNB1; AKT1; HSP90AA1	207; 1499; 3320	27	27
0.00458518	0.0072119	Integrin alphaIIb beta3 signaling	Reactome	R-HSA-354192	AKT1; GRB2; SRC	207; 6714; 2885	27	27
0.00458518	0.0072119	Integrin signaling	Reactome	R-HSA-9006921	AKT1; GRB2; SRC	207; 6714; 2885	27	27
0.00458518	0.0072119	Downstream signaling of activated FGFR4	Reactome	R-HSA-5654716	HRAS; GRB2; PIK3R1	2885; 5295; 3265	27	27
0.00458518	0.0072119	Signaling by FGFR2 in disease	Reactome	R-HSA-5655253	HRAS; GRB2; PIK3R1	3265; 2885; 5295	27	27
0.00458518	0.0072119	ZBP1(DAI) mediated induction of type I IFNs	Reactome	R-HSA-1606322	NFKB1; IKBKG; DHX9	8517; 4790; 1660	27	27
0.00459007	0.0072119	Cell-Cell communication	Reactome	R-HSA-1500931	SRC; NCK1; FYN; CTNNB1; GRB2; PIK3R1	2534; 6714; 4690; 5295; 2885; 1499	124	123
0.0047744	0.00748941	Oocyte meiosis - Homo sapiens (human)	KEGG	path:hsa04114	YWHAZ; CDK1; CDK2; MAPK1; PRKACA; YWHAG	983; 7532; 7534; 5566; 1017; 5594	124	124
0.00500803	0.00784322	Legionellosis - Homo sapiens (human)	KEGG	path:hsa05134	EEF1A1; HSPD1; HSPA8; NFKB1	3329; 4790; 3312; 1915	55	55
0.00505371	0.00790202	Vesicle-mediated transport	Reactome	R-HSA-5653656	TSG101; SRC; RPS27A; UBC; HSPA8; EGFR; UBB; AKT1; UBA52; GRB2; ARRB2; CLTC; ARRB1; HSP90AA1; YWHAZ; YWHAG	207; 7251; 408; 3312; 6714; 2885; 7316; 7311; 3320; 409; 1213; 7314; 6233; 1956; 7532; 7534	620	620
0.00508848	0.00793083	Ca-dependent events	Reactome	R-HSA-111996	PRKCA; MAPK1; PRKACA	5578; 5566; 5594	28	28
0.00508848	0.00793083	Recycling pathway of L1	Reactome	R-HSA-437239	SRC; MAPK1; CLTC	6714; 5594; 1213	29	28
0.0053413	0.00826835	Deadenylation-dependent mRNA decay	Reactome	R-HSA-429914	PABPC1; EIF4A3; LSM2; EIF4A2	1974; 57819; 26986; 9775	56	56
0.00534761	0.00826835	WNT mediated activation of DVL	Reactome	R-HSA-201688	CSNK2A2; CSNK2A1	1459; 1457	9	9
0.00534761	0.00826835	Activated NTRK2 signals through RAS	Reactome	R-HSA-9026519	HRAS; GRB2	3265; 2885	9	9
0.00534761	0.00826835	SHC-related events triggered by IGF1R	Reactome	R-HSA-2428933	HRAS; GRB2	3265; 2885	9	9
0.00534761	0.00826835	ROBO receptors bind AKAP5	Reactome	R-HSA-9010642	PRKCA; PRKACA	5566; 5578	9	9
0.00556659	0.00859326	Autophagy - animal - Homo sapiens (human)	KEGG	path:hsa04140	TRAF6; HRAS; AKT1; MAPK1; PRKACA; PIK3R1	7189; 5295; 3265; 207; 5566; 5594	128	128
0.00562378	0.00865402	nfkb activation by nontypeable hemophilus influenzae	BioCarta	nthipathway	NR3C1; IKBKG; SMAD3	2908; 4088; 8517	29	29
0.00562378	0.00865402	Signalling to ERKs	Reactome	R-HSA-187687	SRC; HRAS; GRB2	6714; 3265; 2885	29	29
0.00570517	0.00876537	Tight junction - Homo sapiens (human)	KEGG	path:hsa04530	MYH10; SRC; PCNA; TUBA1A; JUN; PRKACA; ACTB	4628; 6714; 60; 5566; 3725; 7846; 5111	170	170
0.00605167	0.0092351	rRNA modification in the nucleus and cytosol	Reactome	R-HSA-6790901	RPS7; RPS6; RPS2; RPS9	6203; 6194; 6187; 6201	59	58
0.00605167	0.0092351	rRNA processing in the nucleus and cytosol	Reactome	R-HSA-8868773	RPS7; RPS6; RPS2; RPS9	6203; 6194; 6187; 6201	59	58
0.00605167	0.0092351	Iron uptake and transport	Reactome	R-HSA-917937	UBA52; RPS27A; UBB; UBC	7316; 7311; 7314; 6233	58	58
0.00605167	0.0092351	ABC-family proteins mediated transport	Reactome	R-HSA-382556	UBA52; RPS27A; UBB; UBC	7316; 7311; 7314; 6233	59	58
0.00605845	0.0092351	Th1 and Th2 cell differentiation - Homo sapiens (human)	KEGG	path:hsa04658	NFKB1; MAPK1; JUN; IKBKG; LCK	3725; 4790; 8517; 3932; 5594	92	92
0.00619161	0.00936457	Downstream signaling of activated FGFR2	Reactome	R-HSA-5654696	HRAS; GRB2; PIK3R1	2885; 5295; 3265	30	30
0.00619161	0.00936457	role of mef2d in t-cell apoptosis	BioCarta	mef2dpathway	PRKCA; FYN; LCK	3932; 5578; 2534	30	30
0.00619161	0.00936457	Downstream signaling events of B Cell Receptor (BCR)	Reactome	R-HSA-1168372	NFKB1; HRAS; IKBKG	4790; 3265; 8517	30	30
0.00619161	0.00936457	fmlp induced chemokine gene expression in hmc-1 cells	BioCarta	fmlppathway	PRKCA; HRAS; MAPK1	5578; 3265; 5594	30	30
0.00619161	0.00936457	Pre-NOTCH Transcription and Translation	Reactome	R-HSA-1912408	MOV10; SNW1; TP53	7157; 22938; 4343	30	30
0.00662949	0.00993401	Tetrahydrobiopterin (BH4) synthesis, recycling, salvage and regulation	Reactome	R-HSA-1474151	AKT1; HSP90AA1	207; 3320	10	10
0.00662949	0.00993401	Activation of SMO	Reactome	R-HSA-5635838	ARRB2; ARRB1	408; 409	10	10
0.00662949	0.00993401	Signal attenuation	Reactome	R-HSA-74749	GRB2; MAPK1	5594; 2885	10	10
0.00662949	0.00993401	Activation of the AP-1 family of transcription factors	Reactome	R-HSA-450341	MAPK1; JUN	5594; 3725	10	10
0.00662949	0.00993401	Netrin mediated repulsion signals	Reactome	R-HSA-418886	SRC; FYN	6714; 2534	10	10
0.00662949	0.00993401	regulation of transcriptional activity by pml	BioCarta	pmlpathway	UBE2I; TP53	7157; 7329	10	10
0.00665923	0.00996319	Membrane Trafficking	Reactome	R-HSA-199991	TSG101; SRC; RPS27A; UBC; HSPA8; EGFR; UBB; AKT1; UBA52; GRB2; ARRB2; CLTC; ARRB1; YWHAZ; YWHAG	207; 7251; 408; 3312; 6714; 2885; 7316; 7311; 409; 1213; 7314; 6233; 1956; 7532; 7534	582	582
0.00679247	0.0101158	wnt signaling pathway	BioCarta	wntpathway	CTNNB1; MYC; CSNK2A1	1499; 1457; 4609	31	31
0.00679247	0.0101158	Downstream signaling of activated FGFR1	Reactome	R-HSA-5654687	HRAS; GRB2; PIK3R1	2885; 5295; 3265	31	31
0.00679247	0.0101158	p38 mapk signaling pathway	BioCarta	p38mapkpathway	HRAS; MYC; HSPB1	3265; 3315; 4609	31	31
0.0068223	0.0101446	Long-term depression - Homo sapiens (human)	KEGG	path:hsa04730	PRKCA; HRAS; MAPK1; LYN	3265; 5578; 5594; 4067	60	60
0.0069274	0.0102852	G2/M DNA damage checkpoint	Reactome	R-HSA-69473	YWHAZ; CDK1; TP53; YWHAG; BRCA1	983; 7157; 7532; 7534; 672	96	95
0.00742682	0.0110098	RUNX2 regulates bone development	Reactome	R-HSA-8941326	ABL1; SRC; MAPK1	6714; 25; 5594	32	32
0.00755296	0.0111798	Chaperonin-mediated protein folding	Reactome	R-HSA-390466	TUBA1A; TP53; ACTB; CSNK2A1; CSNK2A2	1457; 7846; 7157; 60; 1459	97	97
0.00803609	0.0117693	eNOS activation	Reactome	R-HSA-203615	AKT1; HSP90AA1	207; 3320	11	11
0.00803609	0.0117693	MET activates RAS signaling	Reactome	R-HSA-8851805	HRAS; GRB2	3265; 2885	11	11
0.00803609	0.0117693	epo signaling pathway	BioCarta	epopathway	HRAS; GRB2	3265; 2885	11	11
0.00803609	0.0117693	cxcr4 signaling pathway	BioCarta	cxcr4pathway	HRAS; PIK3R1	5295; 3265	11	11
0.00803609	0.0117693	Depolymerisation of the Nuclear Lamina	Reactome	R-HSA-4419969	PRKCA; CDK1	5578; 983	11	11
0.00803609	0.0117693	p38MAPK events	Reactome	R-HSA-171007	SRC; HRAS	6714; 3265	11	11
0.00803609	0.0117693	Regulated proteolysis of p75NTR	Reactome	R-HSA-193692	NFKB1; TRAF6	7189; 4790	11	11
0.00829162	0.0121252	Neutrophil degranulation	Reactome	R-HSA-6798695	DDX3X; EEF1A1; HRAS; HSPA8; VCL; TUBB; HSP90AB1; MAPK1; NFKB1; HSP90AA1; XRCC6; ILF2; GSN	3312; 2934; 3265; 3326; 3320; 4790; 1915; 2547; 5594; 7414; 3608; 1654; 203068	490	485
0.00855249	0.0124505	Semaphorin interactions	Reactome	R-HSA-373755	MYH10; HSP90AA1; FYN; HSP90AB1	3320; 4628; 3326; 2534	64	64
0.00855249	0.0124505	rRNA processing	Reactome	R-HSA-72312	RPS7; RPS6; RPS2; RPS9	6203; 6194; 6187; 6201	65	64
0.00855249	0.0124505	Peroxisomal protein import	Reactome	R-HSA-9033241	UBA52; RPS27A; UBB; UBC	7316; 7311; 7314; 6233	64	64
0.00892022	0.0129664	Melanogenesis - Homo sapiens (human)	KEGG	path:hsa04916	PRKCA; CTNNB1; HRAS; MAPK1; PRKACA	3265; 5566; 5578; 5594; 1499	101	101
0.00902583	0.0131003	Inflammatory bowel disease (IBD) - Homo sapiens (human)	KEGG	path:hsa05321	NFKB1; JUN; SMAD2; SMAD3	3725; 4790; 4087; 4088	65	65
0.00928705	0.0134392	Stimuli-sensing channels	Reactome	R-HSA-2672351	UBA52; WNK1; RPS27A; UBB; UBC	7311; 7314; 7316; 65125; 6233	102	102
0.00928705	0.0134392	UCH proteinases	Reactome	R-HSA-5689603	UBA52; RPS27A; ACTB; UBB; UBC	7316; 7314; 6233; 7311; 60	102	102
0.00953487	0.0136771	Interactions of Vpr with host cellular proteins	Reactome	R-HSA-176033	NUP153; SLC25A6; SLC25A5	293; 9972; 292	35	35
0.00953487	0.0136771	Post NMDA receptor activation events	Reactome	R-HSA-438064	HRAS; MAPK1; PRKACA	3265; 5566; 5594	35	35
0.00953487	0.0136771	Lysosome Vesicle Biogenesis	Reactome	R-HSA-432720	HSPA8; CLTC; ARRB1	3312; 1213; 408	35	35
0.00953487	0.0136771	toll-like receptor pathway	BioCarta	tollpathway	JUN; IKBKG; TRAF6	3725; 7189; 8517	35	35
0.0095641	0.0136771	il 3 signaling pathway	BioCarta	il3pathway	HRAS; GRB2	3265; 2885	12	12
0.0095641	0.0136771	IRAK1 recruits IKK complex upon TLR7/8 or 9 stimulation	Reactome	R-HSA-975144	IKBKG; TRAF6	7189; 8517	12	12
0.0095641	0.0136771	IRAK1 recruits IKK complex	Reactome	R-HSA-937039	IKBKG; TRAF6	7189; 8517	12	12
0.0095641	0.0136771	Caspase-mediated cleavage of cytoskeletal proteins	Reactome	R-HSA-264870	GSN; VIM	7431; 2934	12	12
0.00966416	0.0137998	Protein folding	Reactome	R-HSA-391251	TUBA1A; TP53; ACTB; CSNK2A1; CSNK2A2	1457; 7846; 7157; 60; 1459	103	103
0.0100231	0.0142913	Long-term potentiation - Homo sapiens (human)	KEGG	path:hsa04720	PRKCA; HRAS; MAPK1; PRKACA	5578; 5566; 3265; 5594	67	67
0.0105474	0.0150169	p53 signaling pathway - Homo sapiens (human)	KEGG	path:hsa04115	CDK1; MDM2; TP53; CDK2	983; 4193; 7157; 1017	68	68
0.0110977	0.0155725	Huntington,s disease - Homo sapiens (human)	KEGG	path:hsa05016	TP53; SP1; SLC25A6; SLC25A5; HTT; POLR2A; CLTC	6667; 292; 1213; 293; 5430; 7157; 3064	193	193
0.0111146	0.0155725	Platelet Aggregation (Plug Formation)	Reactome	R-HSA-76009	AKT1; GRB2; SRC	207; 6714; 2885	37	37
0.0111146	0.0155725	signal transduction through il1r	BioCarta	il1rpathway	JUN; IKBKG; TRAF6	3725; 7189; 8517	37	37
0.0111146	0.0155725	Aldosterone-regulated sodium reabsorption - Homo sapiens (human)	KEGG	path:hsa04960	PRKCA; MAPK1; PIK3R1	5295; 5578; 5594	37	37
0.0111146	0.0155725	SUMOylation of DNA replication proteins	Reactome	R-HSA-4615885	UBE2I; NUP153; PCNA	7329; 9972; 5111	37	37
0.0112103	0.0155725	attenuation of gpcr signaling	BioCarta	agpcrpathway	PRKCA; ARRB1	408; 5578	13	13
0.0112103	0.0155725	DEx/H-box helicases activate type I IFN and inflammatory cytokines production	Reactome	R-HSA-3134963	DHX9; NFKB1	1660; 4790	13	13
0.0112103	0.0155725	lck and fyn tyrosine kinases in initiation of tcr activation	BioCarta	tcrapathway	FYN; LCK	2534; 3932	13	13
0.0112103	0.0155725	Non-homologous end-joining - Homo sapiens (human)	KEGG	path:hsa03450	PRKDC; XRCC6	2547; 5591	13	13
0.0112103	0.0155725	IRF3-mediated induction of type I IFN	Reactome	R-HSA-3270619	PRKDC; XRCC6	2547; 5591	13	13
0.0112103	0.0155725	il 6 signaling pathway	BioCarta	il6pathway	HRAS; GRB2	3265; 2885	13	13
0.0112103	0.0155725	Platelet Adhesion to exposed collagen	Reactome	R-HSA-75892	LYN; FYN	4067; 2534	13	13
0.0112103	0.0155725	Signaling by Activin	Reactome	R-HSA-1502540	SMAD2; SMAD3	4088; 4087	13	13
0.0112103	0.0155725	b cell survival pathway	BioCarta	bcellsurvivalpathway	AKT1; PIK3R1	5295; 207	13	13
0.0112103	0.0155725	effects of calcineurin in keratinocyte differentiation	BioCarta	calcineurinpathway	PRKCA; SP1	5578; 6667	13	13
0.0112103	0.0155725	melanocyte development and pigmentation pathway	BioCarta	melanocytepathway	HRAS; MAPK1	5594; 3265	13	13
0.0112103	0.0155725	Signal regulatory protein family interactions	Reactome	R-HSA-391160	SRC; GRB2	6714; 2885	13	13
0.0116486	0.0161583	Regulation of insulin secretion	Reactome	R-HSA-422356	PRKCA; PRKACA; SLC25A6; SLC25A5	293; 5578; 292; 5566	70	70
0.0119577	0.0165398	Signaling by FGFR1 in disease	Reactome	R-HSA-5655302	HRAS; GRB2; PIK3R1	3265; 2885; 5295	38	38
0.0119577	0.0165398	Interleukin-2 family signaling	Reactome	R-HSA-451927	GRB2; LCK; PIK3R1	3932; 2885; 5295	38	38
0.01215	0.0167819	FCERI mediated MAPK activation	Reactome	R-HSA-2871796	GRB2; LYN; MAPK1; JUN; HRAS	4067; 3265; 3725; 5594; 2885	109	109
0.0128366	0.0176158	Activation of NMDA receptor and postsynaptic events	Reactome	R-HSA-442755	HRAS; MAPK1; PRKACA	3265; 5566; 5594	39	39
0.0128366	0.0176158	RUNX1 interacts with co-factors whose precise effect on RUNX1 targets is not known	Reactome	R-HSA-8939243	SMARCA4; CSNK2A2; CSNK2A1	6597; 1457; 1459	40	39
0.0129715	0.0176158	AKT phosphorylates targets in the cytosol	Reactome	R-HSA-198323	AKT1; MDM2	207; 4193	14	14
0.0129715	0.0176158	akap95 role in mitosis and chromosome dynamics	BioCarta	akap95pathway	DDX5; CDK1	1655; 983	14	14
0.0129715	0.0176158	SHC1 events in ERBB4 signaling	Reactome	R-HSA-1250347	HRAS; GRB2	3265; 2885	14	14
0.0129715	0.0176158	PTK6 Regulates RHO GTPases, RAS GTPase and MAP kinases	Reactome	R-HSA-8849471	HRAS; RASA1	3265; 5921	14	14
0.0129715	0.0176158	Golgi Cisternae Pericentriolar Stack Reorganization	Reactome	R-HSA-162658	CDK1; MAPK1	5594; 983	14	14
0.0129715	0.0176158	Gap junction trafficking and regulation	Reactome	R-HSA-157858	SRC; CLTC	6714; 1213	14	14
0.0129715	0.0176158	apoptotic signaling in response to dna damage	BioCarta	chemicalpathway	AKT1; TP53	7157; 207	14	14
0.0129715	0.0176158	Regulation of TP53 Activity through Association with Co-factors	Reactome	R-HSA-6804759	AKT1; TP53	7157; 207	14	14
0.0129715	0.0176158	TP53 Regulates Transcription of Genes Involved in G1 Cell Cycle Arrest	Reactome	R-HSA-6804116	CDK2; TP53	7157; 1017	14	14
0.0129715	0.0176158	sumoylation by ranbp2 regulates transcriptional repression	BioCarta	ranbp2pathway	NUP153; MDM2	9972; 4193	14	14
0.0134346	0.0182193	Leishmaniasis - Homo sapiens (human)	KEGG	path:hsa05140	NFKB1; MAPK1; JUN; TRAF6	3725; 7189; 4790; 5594	74	73
0.0135422	0.0183396	Leukocyte transendothelial migration - Homo sapiens (human)	KEGG	path:hsa04670	PRKCA; CTNNB1; ACTB; VCL; PIK3R1	60; 5295; 7414; 5578; 1499	112	112
0.0147027	0.019875	Netrin-1 signaling	Reactome	R-HSA-373752	SRC; FYN; NCK1	4690; 6714; 2534	41	41
0.014717	0.019875	Signaling by Insulin receptor	Reactome	R-HSA-74752	GRB2; HRAS; MAPK1; PIK3R1	5594; 3265; 2885; 5295	75	75
0.0148445	0.0198814	il 4 signaling pathway	BioCarta	il4pathway	AKT1; GRB2	207; 2885	15	15
0.0148445	0.0198814	TFAP2 (AP-2) family regulates transcription of growth factors and their receptors	Reactome	R-HSA-8866910	EGFR; ESR1	1956; 2099	15	15
0.0148445	0.0198814	GRB2:SOS provides linkage to MAPK signaling for Integrins	Reactome	R-HSA-354194	SRC; GRB2	2885; 6714	15	15
0.0148445	0.0198814	repression of pain sensation by the transcriptional regulator dream	BioCarta	dreampathway	POLR2A; JUN	3725; 5430	15	15
0.0148445	0.0198814	chaperones modulate interferon signaling pathway	BioCarta	tidpathway	TP53; IKBKG	7157; 8517	15	15
0.0148445	0.0198814	double stranded rna induced gene expression	BioCarta	rnapathway	TP53; IKBKG	7157; 8517	15	15
0.0153861	0.0205501	Pertussis - Homo sapiens (human)	KEGG	path:hsa05133	NFKB1; MAPK1; JUN; TRAF6	3725; 7189; 4790; 5594	76	76
0.0153861	0.0205501	SUMOylation of DNA damage response and repair proteins	Reactome	R-HSA-3108214	UBE2I; BRCA1; NUP153; PARP1	7329; 672; 9972; 142	76	76
0.0156902	0.0208988	actions of nitric oxide in the heart	BioCarta	no1pathway	AKT1; PIK3R1; HSP90AA1	207; 3320; 5295	42	42
0.0156902	0.0208988	Pre-NOTCH Expression and Processing	Reactome	R-HSA-1912422	MOV10; SNW1; TP53	7157; 22938; 4343	42	42
0.0160742	0.0213809	Antigen processing and presentation - Homo sapiens (human)	KEGG	path:hsa04612	HSP90AB1; HSP90AA1; HSPA8; HSPA5	3309; 3312; 3320; 3326	77	77
0.0166024	0.0220533	Jak-STAT signaling pathway - Homo sapiens (human)	KEGG	path:hsa04630	HRAS; EGFR; AKT1; GRB2; PIK3R1; MYC	4609; 5295; 3265; 207; 2885; 1956	162	162
0.0168264	0.0221387	eNOS activation and regulation	Reactome	R-HSA-203765	AKT1; HSP90AA1	207; 3320	16	16
0.0168264	0.0221387	Metabolism of nitric oxide	Reactome	R-HSA-202131	AKT1; HSP90AA1	207; 3320	16	16
0.0168264	0.0221387	STING mediated induction of host immune responses	Reactome	R-HSA-1834941	PRKDC; XRCC6	2547; 5591	16	16
0.0168264	0.0221387	hypoxia-inducible factor in the cardivascular system	BioCarta	hifpathway	HSP90AA1; JUN	3725; 3320	16	16
0.0168264	0.0221387	control of skeletal myogenesis by hdac and calcium/calmodulin-dependent kinase (camk)	BioCarta	hdacpathway	AKT1; PIK3R1	5295; 207	16	16
0.0168264	0.0221387	bone remodeling	BioCarta	ranklpathway	IKBKG; TRAF6	7189; 8517	16	16
0.0168264	0.0221387	Rap1 signalling	Reactome	R-HSA-392517	YWHAZ; PRKACA	7534; 5566	16	16
0.017775	0.0233237	Influenza Viral RNA Transcription and Replication	Reactome	R-HSA-168273	NUP153; HSP90AA1; POLR2A	5430; 9972; 3320	44	44
0.017775	0.0233237	PLC beta mediated events	Reactome	R-HSA-112043	PRKCA; MAPK1; PRKACA	5578; 5566; 5594	44	44
0.0188724	0.0245857	IRS-mediated signalling	Reactome	R-HSA-112399	HRAS; GRB2; PIK3R1	3265; 2885; 5295	45	45
0.0188724	0.0245857	G-protein mediated events	Reactome	R-HSA-112040	PRKCA; MAPK1; PRKACA	5578; 5566; 5594	45	45
0.018914	0.0245857	Beta-catenin phosphorylation cascade	Reactome	R-HSA-196299	CTNNB1; APC	1499; 324	17	17
0.018914	0.0245857	Activation of E2F1 target genes at G1/S	Reactome	R-HSA-539107	PCNA; CDK1	5111; 983	17	17
0.018914	0.0245857	G1/S-Specific Transcription	Reactome	R-HSA-69205	PCNA; CDK1	5111; 983	17	17
0.018914	0.0245857	Regulation of RUNX1 Expression and Activity	Reactome	R-HSA-8934593	SRC; MOV10	6714; 4343	18	17
0.018914	0.0245857	TRAF6 mediated IRF7 activation	Reactome	R-HSA-933541	TRAF6; IKBKE	7189; 9641	17	17
0.0190186	0.0246886	Amyloid fiber formation	Reactome	R-HSA-977225	UBA52; RPS27A; UBB; UBC	7316; 7311; 7314; 6233	82	81
0.0200067	0.0259366	Hedgehog signaling pathway - Homo sapiens (human)	KEGG	path:hsa04340	PRKACA; ARRB2; ARRB1	408; 409; 5566	47	46
0.0203815	0.0263873	Cell surface interactions at the vascular wall	Reactome	R-HSA-202733	SRC; HRAS; FYN; GRB2; PIK3R1; LYN; LCK	4067; 3265; 2534; 6714; 5295; 3932; 2885	219	218
0.0211046	0.0270707	SHC-mediated cascade:FGFR3	Reactome	R-HSA-5654704	HRAS; GRB2	3265; 2885	18	18
0.0211046	0.0270707	mets affect on macrophage differentiation	BioCarta	etspathway	HRAS; JUN	3265; 3725	18	18
0.0211046	0.0270707	oxidative stress induced gene expression via nrf2	BioCarta	arenrf2pathway	PRKCA; JUN	3725; 5578	18	18
0.0211046	0.0270707	PI-3K cascade:FGFR3	Reactome	R-HSA-5654710	GRB2; PIK3R1	5295; 2885	18	18
0.0211046	0.0270707	Signaling by cytosolic FGFR1 fusion mutants	Reactome	R-HSA-1839117	GRB2; PIK3R1	5295; 2885	18	18
0.0211046	0.0270707	regulation of cell cycle progression by plk3	BioCarta	plk3pathway	CDK1; TP53	7157; 983	18	18
0.0211046	0.0270707	Activation of NF-kappaB in B cells	Reactome	R-HSA-1169091	NFKB1; IKBKG	8517; 4790	18	18
0.0211778	0.0270931	Signaling by FGFR in disease	Reactome	R-HSA-1226099	HRAS; GRB2; PIK3R1	3265; 2885; 5295	47	47
0.0211778	0.0270931	Nucleotide-binding domain, leucine rich repeat containing receptor (NLR) signaling pathways	Reactome	R-HSA-168643	HSP90AB1; IKBKG; TRAF6	7189; 8517; 3326	47	47
0.0223858	0.0286008	G beta:gamma signalling through PI3Kgamma	Reactome	R-HSA-392451	AKT1; GRB2; PIK3R1	207; 2885; 5295	48	48
0.0233951	0.0297338	Metabolism of cofactors	Reactome	R-HSA-8978934	AKT1; HSP90AA1	207; 3320	19	19
0.0233951	0.0297338	Ephrin signaling	Reactome	R-HSA-3928664	SRC; FYN	2534; 6714	19	19
0.0233951	0.0297338	role of mal in rho-mediated activation of srf	BioCarta	malpathway	HRAS; MAPK1	3265; 5594	19	19
0.0233951	0.0297338	prion pathway	BioCarta	prionpathway	RPSA; HSPA5	3309; 3921	19	19
0.0236307	0.0299548	IRS-related events triggered by IGF1R	Reactome	R-HSA-2428928	HRAS; GRB2; PIK3R1	3265; 2885; 5295	49	49
0.0236307	0.0299548	Cocaine addiction - Homo sapiens (human)	KEGG	path:hsa05030	NFKB1; JUN; PRKACA	3725; 4790; 5566	49	49
0.0249124	0.0314974	Vibrio cholerae infection - Homo sapiens (human)	KEGG	path:hsa05110	PRKCA; ACTB; PRKACA	60; 5566; 5578	50	50
0.0249124	0.0314974	IGF1R signaling cascade	Reactome	R-HSA-2428924	HRAS; GRB2; PIK3R1	3265; 2885; 5295	50	50
0.0250635	0.0316471	Tuberculosis - Homo sapiens (human)	KEGG	path:hsa05152	SRC; TRAF6; AKT1; HSPD1; MAPK1; NFKB1	7189; 6714; 4790; 207; 3329; 5594	179	178
0.0257828	0.0323034	lissencephaly gene (lis1) in neuronal migration and development	BioCarta	lis1pathway	ABL1; CSNK2A1	1457; 25	20	20
0.0257828	0.0323034	FRS-mediated FGFR3 signaling	Reactome	R-HSA-5654706	HRAS; GRB2	2885; 3265	20	20
0.0257828	0.0323034	SHC-mediated cascade:FGFR4	Reactome	R-HSA-5654719	HRAS; GRB2	3265; 2885	20	20
0.0257828	0.0323034	tgf beta signaling pathway	BioCarta	tgfbpathway	SMAD2; SMAD3	4088; 4087	20	20
0.0257828	0.0323034	PI-3K cascade:FGFR4	Reactome	R-HSA-5654720	GRB2; PIK3R1	5295; 2885	20	20
0.0257828	0.0323034	JNK (c-Jun kinases) phosphorylation and activation mediated by activated human TAK1	Reactome	R-HSA-450321	IKBKG; TRAF6	7189; 8517	20	20
0.0262311	0.0327382	G-protein beta:gamma signalling	Reactome	R-HSA-397795	AKT1; GRB2; PIK3R1	207; 2885; 5295	51	51
0.0262311	0.0327382	Signaling by Type 1 Insulin-like Growth Factor 1 Receptor (IGF1R)	Reactome	R-HSA-2404192	HRAS; GRB2; PIK3R1	3265; 2885; 5295	51	51
0.0262311	0.0327382	Nuclear Envelope Breakdown	Reactome	R-HSA-2980766	PRKCA; CDK1; NUP153	5578; 983; 9972	51	51
0.0277677	0.0345672	Morphine addiction - Homo sapiens (human)	KEGG	path:hsa05032	PRKCA; PRKACA; ARRB2; ARRB1	408; 409; 5566; 5578	91	91
0.0277677	0.0345672	mRNA surveillance pathway - Homo sapiens (human)	KEGG	path:hsa03015	PABPC1; NUDT21; UPF1; EIF4A3	9775; 11051; 5976; 26986	91	91
0.0282649	0.034962	SHC-mediated cascade:FGFR1	Reactome	R-HSA-5654688	HRAS; GRB2	3265; 2885	21	21
0.0282649	0.034962	phosphoinositides and their downstream targets	BioCarta	ptdinspathway	AKT1; LYN	4067; 207	21	21
0.0282649	0.034962	Signaling by NODAL	Reactome	R-HSA-1181150	SMAD2; SMAD3	4088; 4087	21	21
0.0282649	0.034962	PI-3K cascade:FGFR1	Reactome	R-HSA-5654689	GRB2; PIK3R1	5295; 2885	21	21
0.0282649	0.034962	activated TAK1 mediates p38 MAPK activation	Reactome	R-HSA-450302	IKBKG; TRAF6	7189; 8517	21	21
0.0289786	0.0357993	Ca2+ pathway	Reactome	R-HSA-4086398	PRKCA; CTNNB1; MYC	5578; 1499; 4609	53	53
0.0295339	0.0364389	Transcriptional misregulation in cancer - Homo sapiens (human)	KEGG	path:hsa05202	TP53; SP1; DDX5; NFKB1; MYC; MDM2	4609; 6667; 4193; 1655; 4790; 7157	186	185
0.0297619	0.0366736	Role of LAT2/NTAL/LAB on calcium mobilization	Reactome	R-HSA-2730905	LYN; GRB2; FYN; PIK3R1	4067; 2534; 5295; 2885	93	93
0.0304074	0.0374216	Regulation of lipolysis in adipocytes - Homo sapiens (human)	KEGG	path:hsa04923	AKT1; PRKACA; PIK3R1	5295; 5566; 207	54	54
0.03079	0.0378084	Integration of energy metabolism	Reactome	R-HSA-163685	PRKCA; PRKACA; SLC25A6; SLC25A5	293; 5578; 292; 5566	94	94
0.0308386	0.0378084	FRS-mediated FGFR4 signaling	Reactome	R-HSA-5654712	HRAS; GRB2	2885; 3265	22	22
0.0308386	0.0378084	role of brca1 brca2 and atr in cancer susceptibility	BioCarta	atrbrcapathway	BRCA1; TP53	7157; 672	22	22
0.0309015	0.0378377	Cilium Assembly	Reactome	R-HSA-5617833	TUBA1A; TUBB; CDK1; PRKACA; HSP90AA1; YWHAG	983; 7846; 5566; 7532; 3320; 203068	187	187
0.0333746	0.0405608	Golgi Associated Vesicle Biogenesis	Reactome	R-HSA-432722	HSPA8; CLTC; ARRB1	3312; 408; 1213	56	56
0.0335013	0.0405608	regulation of bad phosphorylation	BioCarta	badpathway	AKT1; PIK3R1	207; 5295	23	23
0.0335013	0.0405608	RAF-independent MAPK1/3 activation	Reactome	R-HSA-112409	CDK1; MAPK1	983; 5594	23	23
0.0335013	0.0405608	cyclins and cell cycle regulation	BioCarta	cellcyclepathway	CDK1; CDK2	1017; 983	23	23
0.0335013	0.0405608	FRS-mediated FGFR1 signaling	Reactome	R-HSA-5654693	HRAS; GRB2	2885; 3265	23	23
0.0335013	0.0405608	PI-3K cascade:FGFR2	Reactome	R-HSA-5654695	GRB2; PIK3R1	2885; 5295	23	23
0.0335013	0.0405608	SHC-mediated cascade:FGFR2	Reactome	R-HSA-5654699	HRAS; GRB2	3265; 2885	23	23
0.0335013	0.0405608	tnf/stress related signaling	BioCarta	stresspathway	JUN; IKBKG	3725; 8517	23	23
0.0335013	0.0405608	TP53 regulates transcription of additional cell cycle genes whose exact role in the p53 pathway remain uncertain	Reactome	R-HSA-6804115	NPM1; TP53	7157; 4869	23	23
0.0339992	0.0411124	Inflammatory mediator regulation of TRP channels - Homo sapiens (human)	KEGG	path:hsa04750	PRKCA; SRC; PRKACA; PIK3R1	5295; 6714; 5566; 5578	97	97
0.0353981	0.0427507	Adrenergic signaling in cardiomyocytes - Homo sapiens (human)	KEGG	path:hsa04261	PRKCA; AKT1; MAPK1; PRKACA; TPM1	7168; 207; 5566; 5578; 5594	144	144
0.036243	0.0436172	FCERI mediated NF-kB activation	Reactome	R-HSA-2871837	NFKB1; LYN; IKBKG; TRAF6	4067; 4790; 8517; 7189	99	99
0.0362504	0.0436172	segmentation clock	BioCarta	hespathway	CTNNB1; CSNK2A1	1499; 1457	24	24
0.0362504	0.0436172	Resolution of AP sites via the multiple-nucleotide patch replacement pathway	Reactome	R-HSA-110373	PCNA; PARP1	5111; 142	24	24
0.0364869	0.0438475	Viral myocarditis - Homo sapiens (human)	KEGG	path:hsa05416	ABL1; ACTB; FYN	25; 60; 2534	59	58
0.0390832	0.0467362	Constitutive Signaling by AKT1 E17K in Cancer	Reactome	R-HSA-5674400	AKT1; MDM2	207; 4193	25	25
0.0390832	0.0467362	stathmin and breast cancer resistance to antimicrotubule agents	BioCarta	stathminpathway	CDK1; TUBA1A	983; 7846	25	25
0.0390832	0.0467362	Cyclin A/B1/B2 associated events during G2/M transition	Reactome	R-HSA-69273	CDK1; CDK2	1017; 983	25	25
0.0390832	0.0467362	FRS-mediated FGFR2 signaling	Reactome	R-HSA-5654700	HRAS; GRB2	2885; 3265	25	25
0.0391634	0.0467745	cAMP signaling pathway - Homo sapiens (human)	KEGG	path:hsa04024	JUN; AKT1; MAPK1; PRKACA; PIK3R1; NFKB1	3725; 5295; 4790; 207; 5566; 5594	198	198
0.0419974	0.0499137	signaling pathway from g-protein families	BioCarta	gpcrpathway	PRKCA; HRAS	5578; 3265	26	26
0.0419974	0.0499137	Calmodulin induced events	Reactome	R-HSA-111933	PRKCA; PRKACA	5578; 5566	26	26
0.0419974	0.0499137	CaM pathway	Reactome	R-HSA-111997	PRKCA; PRKACA	5578; 5566	26	26
0.0419974	0.0499137	Interleukin-7 signaling	Reactome	R-HSA-1266695	SMARCA4; PIK3R1	6597; 5295	26	26
0.0430453	0.0510965	Neurotransmitter receptors and postsynaptic signal transmission	Reactome	R-HSA-112314	PRKCA; MDM2; MAPK1; PRKACA; HRAS	5578; 5566; 5594; 4193; 3265	153	152
0.0431419	0.0511487	Regulation of PTEN gene transcription	Reactome	R-HSA-8943724	JUN; MAPK1; TP53	7157; 3725; 5594	62	62
0.0446988	0.0528882	Signaling by Rho GTPases	Reactome	R-HSA-194315	MYH10; SRC; YWHAZ; NCK1; GRB2; CTNNB1; MAPK1; ABL1; ACTB; YWHAG	6714; 1499; 4690; 60; 5594; 25; 4628; 7532; 2885; 7534	434	429
0.0448942	0.0528882	Basal cell carcinoma - Homo sapiens (human)	KEGG	path:hsa05217	CTNNB1; APC; TP53	324; 1499; 7157	63	63
0.0448942	0.0528882	Cytosolic DNA-sensing pathway - Homo sapiens (human)	KEGG	path:hsa04623	NFKB1; IKBKG; IKBKE	9641; 8517; 4790	64	63
0.0449904	0.0528882	Interleukin receptor SHC signaling	Reactome	R-HSA-912526	GRB2; PIK3R1	2885; 5295	27	27
0.0449904	0.0528882	thrombin signaling and protease-activated receptors	BioCarta	par1pathway	PRKCA; PIK3R1	5578; 5295	27	27
0.0449904	0.0528882	CREB phosphorylation through the activation of Ras	Reactome	R-HSA-442742	HRAS; MAPK1	5594; 3265	27	27
0.0449904	0.0528882	MET promotes cell motility	Reactome	R-HSA-8875878	SRC; GRB2	6714; 2885	27	27
0.0480597	0.0562241	Prefoldin mediated transfer of substrate to CCT/TriC	Reactome	R-HSA-389957	ACTB; TUBA1A	60; 7846	28	28
0.0480597	0.0562241	Synthesis of PC	Reactome	R-HSA-1483191	CSNK2A2; CSNK2A1	1457; 1459	28	28
0.0480597	0.0562241	multi-step regulation of transcription by pitx2	BioCarta	pitx2pathway	CTNNB1; CSNK2A1	1499; 1457	28	28
0.0480597	0.0562241	DNA Damage/Telomere Stress Induced Senescence	Reactome	R-HSA-2559586	CDK2; TP53	7157; 1017	28	28

## Sheet: PPI_M2_topN_paths.tab
p-value	q-value	pathway	source	external_id	members_input_overlap	members_input_overlap_geneids	size	effective_size
1.20568e-52	1.17072e-49	Metabolism of RNA	Reactome	R-HSA-8953854	RPS13; RPL26; RPS10; RPS16; SF3B3; RPL9; RPL6; RPL7; RPL4; HSPA8; SF3B1; RPS15A; HNRNPU; RPS7; RPS6; HNRNPH1; RPL23; DHX15; NUDT21; RPS9; PRPF6; SNRNP200; RPL7A; SF3B2; PRPF19; RPL24; HNRNPA1; U2AF2; RPL21; SNRPA1; PRPF40A; LSM4; HNRNPK; HNRNPA2B1; SF3A2; PABPC1; HNRNPC; RPL27A; HNRNPF; HNRNPM; DHX9; CDC5L; RPL5; PRKCA; RPLP1; U2AF1; RPS8; SF3A1; POLR2A; RPL11; RPL12; RPL13; RPS4X; RPS27A; RPL18;…	6627; 5578; 23020; 6133; 6144; 988; 6130; 6189; 6191; 23451; 22938; 11338; 1660; 6135; 6633; 6124; 5430; 6152; 3192; 6210; 55660; 6136; 11051; 23524; 6204; 24148; 1655; 6157; 7311; 3312; 23450; 6194; 3187; 2091; 6176; 6203; 6201; 1665; 27339; 6188; 10250; 3181; 6125; 7307; 6129; 3921; 3190; 6233; 6137; 3183; 4670; 26986; 4904; 10992; 8175; 6202; 6160; 6625; 3185; 10291; 9349; 6141; 6154; 3178; 90…	586	584
2.42873e-39	1.17915e-36	Peptide chain elongation	Reactome	R-HSA-156902	RPS13; RPS10; RPS16; RPL9; RPL6; RPL7; RPL27A; RPS27A; RPS15A; RPS7; RPS6; RPS3; RPS9; RPS8; RPL7A; RPL24; RPL26; RPL21; RPL23; EEF1A1; RPL4; RPL5; RPLP1; RPL14; RPL11; RPL12; RPL13; RPS4X; RPL18; RPSA; RPL31; UBA52; RPS3A	6124; 6203; 6137; 6176; 6189; 6210; 6133; 6144; 6157; 6233; 6202; 6136; 6160; 6188; 6130; 6201; 6154; 9349; 6129; 6204; 7311; 9045; 6191; 6125; 6194; 6128; 6207; 6141; 6152; 6135; 6217; 1915; 3921	101	100
3.95085e-39	1.27876e-36	L13a-mediated translational silencing of Ceruloplasmin expression	Reactome	R-HSA-156827	RPS13; EIF3C; RPS16; RPL9; RPL6; RPL7; RPL27A; RPS27A; RPS15A; RPS7; RPS6; RPS10; RPS3; RPS9; RPS8; RPL7A; RPL24; RPL26; RPL21; EIF3E; RPL23; PABPC1; RPL4; RPL5; RPLP1; RPL14; RPL11; RPL12; RPL13; RPS4X; RPL18; RPSA; RPL31; UBA52; RPS3A	6124; 6203; 6137; 8663; 6176; 6189; 26986; 6233; 6210; 6133; 6144; 6157; 6202; 6136; 6160; 6188; 6130; 6201; 6154; 9349; 6129; 6204; 3646; 7311; 9045; 6191; 6125; 6194; 6128; 6207; 6141; 6152; 6135; 6217; 3921	125	123
5.99114e-39	1.45435e-36	Formation of a pool of free 40S subunits	Reactome	R-HSA-72689	RPS13; EIF3C; RPS16; RPL9; RPL6; RPL7; RPL27A; RPS27A; RPS15A; RPS7; RPS6; RPS10; RPS3; RPS9; RPS8; RPL7A; RPL24; RPL26; RPL21; EIF3E; RPL23; RPL4; RPL5; RPLP1; RPL14; RPL11; RPL12; RPL13; RPS4X; RPL18; RPSA; RPL31; UBA52; RPS3A	6124; 6203; 6137; 8663; 6176; 6189; 6233; 6210; 6133; 6144; 6157; 6202; 6136; 6160; 6188; 6130; 6201; 6154; 9349; 6129; 6204; 3646; 7311; 9045; 6191; 6125; 6194; 6128; 6207; 6141; 6152; 6135; 6217; 3921	115	113
1.59931e-38	2.58822e-36	Eukaryotic Translation Elongation	Reactome	R-HSA-156842	RPS13; RPS10; RPS16; RPL9; RPL6; RPL7; RPL27A; RPS27A; RPS15A; RPS7; RPS6; RPS3; RPS9; RPS8; RPL7A; RPL24; RPL26; RPL21; RPL23; EEF1A1; RPL4; RPL5; RPLP1; RPL14; RPL11; RPL12; RPL13; RPS4X; RPL18; RPSA; RPL31; UBA52; RPS3A	6124; 6203; 6137; 6176; 6189; 6233; 6210; 6133; 6144; 6157; 6202; 6136; 6160; 6188; 6130; 6201; 6154; 9349; 6129; 6204; 7311; 9045; 6191; 6125; 6194; 6128; 6207; 6141; 6152; 6135; 6217; 1915; 3921	106	105
1.59931e-38	2.58822e-36	Nonsense Mediated Decay (NMD) independent of the Exon Junction Complex (EJC)	Reactome	R-HSA-975956	RPS13; RPS10; RPS16; RPL9; RPL6; RPL7; RPL27A; RPS27A; RPS15A; RPS7; RPS6; RPS3; RPS9; RPS8; RPL7A; RPL24; RPL26; RPL21; RPL23; PABPC1; RPL4; RPL5; RPLP1; RPL14; RPL11; RPL12; RPL13; RPS4X; RPL18; RPSA; RPL31; UBA52; RPS3A	6124; 6203; 6137; 6176; 6189; 26986; 6233; 6210; 6133; 6144; 6157; 6202; 6136; 6160; 6188; 6130; 6201; 6154; 9349; 6129; 6204; 7311; 9045; 6191; 6125; 6194; 6128; 6207; 6141; 6152; 6135; 6217; 3921	106	105
2.32857e-38	2.8263e-36	Nonsense Mediated Decay (NMD) enhanced by the Exon Junction Complex (EJC)	Reactome	R-HSA-975957	RPS13; RPS10; RPS16; RPL9; RPL6; RPL7; RPL27A; RPS27A; RPS15A; RPS7; RPS6; RPS3; RPS9; RPS8; RPL7A; RPL24; RPL26; RPL21; RPL23; PABPC1; RPL4; RPL5; RPLP1; RPL14; RPL11; RPL12; RPL13; RPS4X; RPL18; RPSA; RPL31; UBA52; RPS3A; EIF4A3	6124; 6203; 6137; 6176; 6189; 26986; 6233; 6210; 6133; 6144; 6157; 6202; 6136; 6160; 6188; 6130; 6201; 6154; 9349; 6129; 6204; 7311; 9045; 6191; 6125; 6194; 6128; 6207; 9775; 6141; 6152; 6135; 6217; 3921	118	117
2.32857e-38	2.8263e-36	Nonsense-Mediated Decay (NMD)	Reactome	R-HSA-927802	RPS13; RPS10; RPS16; RPL9; RPL6; RPL7; RPL27A; RPS27A; RPS15A; RPS7; RPS6; RPS3; RPS9; RPS8; RPL7A; RPL24; RPL26; RPL21; RPL23; PABPC1; RPL4; RPL5; RPLP1; RPL14; RPL11; RPL12; RPL13; RPS4X; RPL18; RPSA; RPL31; UBA52; RPS3A; EIF4A3	6124; 6203; 6137; 6176; 6189; 26986; 6233; 6210; 6133; 6144; 6157; 6202; 6136; 6160; 6188; 6130; 6201; 6154; 9349; 6129; 6204; 7311; 9045; 6191; 6125; 6194; 6128; 6207; 9775; 6141; 6152; 6135; 6217; 3921	118	117
4.7858e-38	4.64701e-36	Cap-dependent Translation Initiation	Reactome	R-HSA-72737	RPS13; EIF3C; RPS16; RPL9; RPL6; RPL7; RPL27A; RPS27A; RPS15A; RPS7; RPS6; RPS10; RPS3; RPS9; RPS8; RPL7A; RPL24; RPL26; RPL21; EIF3E; RPL23; PABPC1; RPL4; RPL5; RPLP1; RPL14; RPL11; RPL12; RPL13; RPS4X; RPL18; RPSA; RPL31; UBA52; RPS3A	6124; 6203; 6137; 8663; 6176; 6189; 26986; 6233; 6210; 6133; 6144; 6157; 6202; 6136; 6160; 6188; 6130; 6201; 6154; 9349; 6129; 6204; 3646; 7311; 9045; 6191; 6125; 6194; 6128; 6207; 6141; 6152; 6135; 6217; 3921	133	131
4.7858e-38	4.64701e-36	Eukaryotic Translation Initiation	Reactome	R-HSA-72613	RPS13; EIF3C; RPS16; RPL9; RPL6; RPL7; RPL27A; RPS27A; RPS15A; RPS7; RPS6; RPS10; RPS3; RPS9; RPS8; RPL7A; RPL24; RPL26; RPL21; EIF3E; RPL23; PABPC1; RPL4; RPL5; RPLP1; RPL14; RPL11; RPL12; RPL13; RPS4X; RPL18; RPSA; RPL31; UBA52; RPS3A	6124; 6203; 6137; 8663; 6176; 6189; 26986; 6233; 6210; 6133; 6144; 6157; 6202; 6136; 6160; 6188; 6130; 6201; 6154; 9349; 6129; 6204; 3646; 7311; 9045; 6191; 6125; 6194; 6128; 6207; 6141; 6152; 6135; 6217; 3921	133	131
2.19775e-37	1.94001e-35	GTP hydrolysis and joining of the 60S ribosomal subunit	Reactome	R-HSA-72706	RPS13; EIF3C; RPS16; RPL9; RPL6; RPL7; RPL27A; RPS27A; RPS15A; RPS7; RPS6; RPS10; RPS3; RPS9; RPS8; RPL7A; RPL24; RPL26; RPL21; EIF3E; RPL23; RPL4; RPL5; RPLP1; RPL14; RPL11; RPL12; RPL13; RPS4X; RPL18; RPSA; RPL31; UBA52; RPS3A	6124; 6203; 6137; 8663; 6176; 6189; 6233; 6210; 6133; 6144; 6157; 6202; 6136; 6160; 6188; 6130; 6201; 6154; 9349; 6129; 6204; 3646; 7311; 9045; 6191; 6125; 6194; 6128; 6207; 6141; 6152; 6135; 6217; 3921	126	124
3.62007e-37	2.70391e-35	Eukaryotic Translation Termination	Reactome	R-HSA-72764	RPS13; RPS10; RPS16; RPL9; RPL6; RPL7; RPL27A; RPS27A; RPS15A; RPS7; RPS6; RPS3; RPS9; RPS8; RPL7A; RPL24; RPL26; RPL21; RPL23; RPL4; RPL5; RPLP1; RPL14; RPL11; RPL12; RPL13; RPS4X; RPL18; RPSA; RPL31; UBA52; RPS3A	6124; 6203; 6137; 6176; 6189; 6233; 6210; 6133; 6144; 6157; 6202; 6136; 6160; 6188; 6130; 6201; 6154; 9349; 6129; 6204; 7311; 9045; 6191; 6125; 6194; 6128; 6207; 6141; 6152; 6135; 6217; 3921	104	103
3.62007e-37	2.70391e-35	Selenocysteine synthesis	Reactome	R-HSA-2408557	RPS13; RPS10; RPS16; RPL9; RPL6; RPL7; RPL27A; RPS27A; RPS15A; RPS7; RPS6; RPS3; RPS9; RPS8; RPL7A; RPL24; RPL26; RPL21; RPL23; RPL4; RPL5; RPLP1; RPL14; RPL11; RPL12; RPL13; RPS4X; RPL18; RPSA; RPL31; UBA52; RPS3A	6124; 6203; 6137; 6176; 6189; 6233; 6210; 6133; 6144; 6157; 6202; 6136; 6160; 6188; 6130; 6201; 6154; 9349; 6129; 6204; 7311; 9045; 6191; 6125; 6194; 6128; 6207; 6141; 6152; 6135; 6217; 3921	104	103
2.31163e-34	1.60328e-32	SRP-dependent cotranslational protein targeting to membrane	Reactome	R-HSA-1799339	RPS13; RPS10; RPS16; RPL9; RPL6; RPL7; RPL27A; RPS27A; RPS15A; RPS7; RPS6; RPS3; RPS9; RPS8; RPL7A; RPL24; RPL26; RPL21; RPL23; RPL4; RPL5; RPLP1; RPL14; RPL11; RPL12; RPL13; RPS4X; RPL18; RPSA; RPL31; UBA52; RPS3A	6124; 6203; 6137; 6176; 6189; 6233; 6210; 6133; 6144; 6157; 6202; 6136; 6160; 6188; 6130; 6201; 6154; 9349; 6129; 6204; 7311; 9045; 6191; 6125; 6194; 6128; 6207; 6141; 6152; 6135; 6217; 3921	124	123
9.54293e-34	6.17746e-32	Selenoamino acid metabolism	Reactome	R-HSA-2408522	RPS13; RPS10; RPS16; RPL9; RPL6; RPL7; RPL27A; RPL5; RPS15A; RPS7; RPS6; RPS3; RPS9; RPS8; RPL7A; RPL24; RPL26; RPL21; RPL23; RPL4; RPS27A; RPLP1; RPL14; RPL11; RPL12; RPL13; RPS4X; RPL18; RPSA; RPL31; UBA52; RPS3A	6124; 6203; 6137; 6176; 6210; 6133; 6144; 6157; 6202; 6136; 6160; 6188; 6130; 6201; 9349; 6129; 6204; 6189; 6154; 7311; 9045; 6191; 6125; 6194; 6128; 6207; 6141; 6152; 6135; 6217; 3921; 6233	129	128
5.85851e-33	3.55539e-31	mRNA Splicing - Major Pathway	Reactome	R-HSA-72163	HSPA8; SF3B1; SF3B3; SF3B2; HNRNPH1; DHX15; NUDT21; PRPF6; SNRNP200; PRPF19; U2AF2; SNRPA1; PRPF40A; HNRNPK; SF3A1; SF3A2; SNRNP70; HNRNPF; HNRNPM; DHX9; CDC5L; HNRNPU; LSM4; HNRNPA1; POLR2A; U2AF1; SNW1; SNRPD2; SRRM1; HNRNPC; SRRM2; DDX5; HNRNPA2B1; YBX1; EIF4A3	6627; 3183; 3192; 4670; 4904; 55660; 27339; 10992; 988; 5430; 8175; 6625; 3185; 10250; 23020; 11051; 23451; 3181; 10291; 24148; 22938; 1655; 3178; 9775; 1665; 25804; 3312; 23450; 11338; 23524; 3187; 1660; 7307; 3190; 6633	178	178
2.98806e-32	1.70671e-30	mRNA Splicing	Reactome	R-HSA-72172	HSPA8; SF3B1; SF3B3; SF3B2; HNRNPH1; DHX15; NUDT21; PRPF6; SNRNP200; PRPF19; U2AF2; SNRPA1; PRPF40A; HNRNPK; SF3A1; SF3A2; SNRNP70; HNRNPF; HNRNPM; DHX9; CDC5L; HNRNPU; LSM4; HNRNPA1; POLR2A; U2AF1; SNW1; SNRPD2; SRRM1; HNRNPC; SRRM2; DDX5; HNRNPA2B1; YBX1; EIF4A3	6627; 3183; 3192; 4670; 4904; 55660; 27339; 10992; 988; 5430; 8175; 6625; 3185; 10250; 23020; 11051; 23451; 3181; 10291; 24148; 22938; 1655; 3178; 9775; 1665; 25804; 3312; 23450; 11338; 23524; 3187; 1660; 7307; 3190; 6633	186	186
4.79977e-31	2.58921e-29	Ribosome - Homo sapiens (human)	KEGG	path:hsa03010	RPS13; RPS10; RPS16; RPL9; RPL6; RPL7; RPL27A; RPS27A; RPS15A; RPS7; RPS6; RPS3; RPL4; RPS9; RPS8; RPL7A; RPL24; RPL26; RPL21; RPL23; RPLP1; RPL5; RPL14; RPL11; RPL12; RPL13; RPS4X; RPL18; RPSA; RPL31; UBA52; RPS3A	6144; 6152; 6154; 6157; 6176; 6188; 6189; 6191; 6194; 6201; 6202; 6203; 6204; 6207; 6210; 6217; 6233; 6160; 9349; 7311; 3921; 9045; 6124; 6125; 6128; 6129; 6130; 6133; 6135; 6136; 6137; 6141	154	153
3.0414e-28	1.55431e-26	Processing of Capped Intron-Containing Pre-mRNA	Reactome	R-HSA-72203	HSPA8; SF3B1; SF3B3; SF3B2; HNRNPH1; DHX15; NUDT21; PRPF6; SNRNP200; PRPF19; U2AF2; SNRPA1; PRPF40A; HNRNPK; SF3A1; SF3A2; SNRNP70; HNRNPF; HNRNPM; DHX9; CDC5L; HNRNPU; LSM4; HNRNPA1; SNW1; POLR2A; U2AF1; HNRNPC; SNRPD2; SRRM1; HNRNPA2B1; SRRM2; DDX5; YBX1; EIF4A3	6627; 3183; 3192; 4670; 4904; 23524; 27339; 10992; 988; 5430; 8175; 6625; 3185; 10250; 23020; 11051; 23451; 3181; 10291; 24148; 1655; 3178; 9775; 1665; 25804; 3312; 23450; 55660; 11338; 3187; 1660; 7307; 3190; 6633; 22938	240	240
1.1889e-25	5.77211e-24	Translation	Reactome	R-HSA-72766	RPS13; RPS10; RPS16; RPL9; RPL6; PABPC1; RPL27A; RPL5; RPS15A; RPS7; RPS6; RPS3; RPS9; RPS8; RPL7A; RPL24; EIF3C; RPL21; EIF3E; RPL23; RPL26; EEF1A1; RPL4; RPS27A; RPL7; RPLP1; RPL14; RPL11; RPL12; RPL13; RPS4X; RPL18; RPSA; RPL31; UBA52; RPS3A	6124; 6137; 6133; 6176; 26986; 6233; 6135; 6210; 6144; 6125; 6157; 6136; 6202; 6160; 6188; 6130; 6201; 6217; 9349; 6204; 8663; 3646; 6154; 9045; 6191; 3921; 6128; 6189; 6194; 6207; 6152; 7311; 6141; 1915; 6129; 6203	310	307
2.15677e-24	9.97249e-23	Spliceosome - Homo sapiens (human)	KEGG	path:hsa03040	HSPA8; SF3B1; SF3B3; SF3B2; DHX15; PRPF6; SNRNP200; U2AF1; U2AF2; HNRNPU; PRPF40A; HNRNPK; HNRNPM; SF3A2; SNRNP70; SF3A1; CDC5L; LSM4; HNRNPA1; SNRPD2; SNW1; SNRPA1; HNRNPC; DDX5; PRPF19; EIF4A3	9775; 10291; 4670; 11338; 24148; 3183; 3190; 1655; 3192; 3178; 1665; 55660; 7307; 27339; 25804; 3312; 23450; 23451; 22938; 10992; 988; 6625; 6627; 6633; 23020; 8175	134	134
4.67685e-20	2.06419e-18	Metabolism of amino acids and derivatives	Reactome	R-HSA-71291	RPS13; RPS10; RPS16; RPL9; RPL6; RPL7; RPL27A; RPL5; RPS15A; RPS7; RPS6; RPS3; RPS9; RPS8; RPL7A; RPL24; RPL26; RPL21; RPL23; RPL4; RPS27A; RPLP1; RPL14; RPL11; RPL12; RPL13; RPS4X; RPL18; RPSA; RPL31; UBA52; RPS3A	6124; 6203; 6137; 6176; 6135; 6210; 6144; 6157; 6136; 6160; 6188; 6130; 6201; 6204; 6189; 6141; 6154; 7311; 9045; 6133; 6191; 6125; 6194; 6128; 6207; 6152; 6217; 6129; 3921; 6202; 9349; 6233	338	335
4.23774e-17	1.78906e-15	Metabolism of proteins	Reactome	R-HSA-392499	RPS13; RPS10; VCP; RPS16; HSPA5; RPL9; RPL6; RPL7; RPL27A; RPL5; SMAD2; SMAD3; RPS7; RPS6; ARRB2; IKBKG; ARRB1; RPS3; RPS9; RPS8; DDX17; RPL7A; RPL24; RPL26; RPL21; EIF3E; RPL23; HSPD1; GOLGA2; HNRNPK; EEF1A1; MYC; HNRNPC; RPL4; TOP2A; PCNA; RPS27A; TRAF6; RPLP1; PABPC1; PARP1; RPL14; RPS15A; RPL12; RPL13; RPS4X; HSPA8; MDM2; EP300; RPL18; CSNK2A1; UBE2I; EIF3C; TP53; FN1; RPSA; VHL; PRKDC; H2AFX…	4193; 6133; 6144; 6130; 6201; 4087; 6210; 2033; 409; 6157; 6154; 6125; 3921; 6233; 3309; 7153; 8517; 408; 6191; 3014; 6135; 7316; 6124; 6203; 4088; 7184; 324; 142; 6207; 4609; 6137; 6202; 6217; 1457; 2335; 983; 6136; 6129; 6204; 7311; 6194; 7189; 6176; 7157; 5111; 1915; 6160; 9349; 9045; 6128; 8663; 6189; 3312; 2801; 3646; 7415; 60; 6141; 6152; 5591; 6188; 3329; 10521; 3190; 3183; 7329; 26986; 74…	2008	1999
5.03796e-17	2.03827e-15	Translation initiation complex formation	Reactome	R-HSA-72649	RPS13; RPS27A; RPS16; RPSA; PABPC1; EIF3C; EIF3E; RPS15A; RPS7; RPS6; RPS10; RPS3A; RPS4X; RPS3; RPS9; RPS8	6203; 6194; 6207; 6202; 6189; 8663; 3646; 26986; 6217; 6188; 6201; 3921; 6191; 6233; 6204; 6210	68	66
6.55054e-17	2.54423e-15	Activation of the mRNA upon binding of the cap-binding complex and eIFs, and subsequent binding to 43S	Reactome	R-HSA-72662	RPS13; RPS27A; RPS16; RPSA; PABPC1; EIF3C; EIF3E; RPS15A; RPS7; RPS6; RPS10; RPS3A; RPS4X; RPS3; RPS9; RPS8	6203; 6194; 6207; 6189; 8663; 26986; 6217; 6188; 6201; 3921; 6202; 6191; 3646; 6233; 6204; 6210	69	67
2.18297e-16	8.15255e-15	Diseases of signal transduction	Reactome	R-HSA-5663202	RPS27A; EGFR; SMAD2; SMAD3; ARRB2; ARRB1; LMNA; FYN; MAPK3; MAPK1; PIK3R1; MYC; SRC; VCL; VCP; MDM2; EP300; SNW1; FN1; PHB; UBA52; GRB2; UBC; HSP90AA1; LCK	4088; 2534; 1956; 5594; 4193; 4000; 6714; 7415; 5295; 2335; 2033; 3932; 5245; 2885; 7311; 7414; 22938; 5595; 3320; 409; 4087; 7316; 408; 4609; 6233	247	247
2.27621e-16	8.18594e-15	Formation of the ternary complex, and subsequently, the 43S complex	Reactome	R-HSA-72695	RPS13; RPS27A; RPS16; RPSA; EIF3C; EIF3E; RPS15A; RPS7; RPS6; RPS10; RPS3A; RPS4X; RPS3; RPS9; RPS8	6203; 6194; 6207; 6202; 6189; 8663; 3646; 6217; 6188; 6201; 3921; 6191; 6233; 6204; 6210	61	59
1.25488e-15	4.35173e-14	Disease	Reactome	R-HSA-1643685	SSRP1; JUN; RPS27A; EGFR; SMAD2; SMAD3; CTNNB1; ARRB2; ARRB1; MDM2; XRCC6; FYN; MAPK3; GOLGA2; MAPK1; PIK3R1; MYC; SRC; VCL; SLC25A5; VCP; POLR2A; LMNA; EP300; NPM1; SNW1; FN1; PHB; UBA52; GRB2; UBC; HSP90AA1; LCK	4193; 408; 6714; 2335; 22938; 2885; 5595; 4087; 7316; 1499; 5430; 2534; 4088; 7415; 2033; 3932; 5245; 7311; 3320; 409; 4000; 3725; 7414; 2801; 6749; 4609; 6233; 1956; 2547; 5594; 292; 5295; 4869	509	507
1.42414e-15	4.76843e-14	Ribosomal scanning and start codon recognition	Reactome	R-HSA-72702	RPS13; RPS27A; RPS16; RPSA; EIF3C; EIF3E; RPS15A; RPS7; RPS6; RPS10; RPS3A; RPS4X; RPS3; RPS9; RPS8	6203; 6194; 6207; 6202; 6189; 3646; 8663; 6217; 6188; 6201; 3921; 6191; 6233; 6204; 6210	68	66
1.16632e-13	3.77498e-12	Hepatitis B - Homo sapiens (human)	KEGG	path:hsa05161	YWHAZ; SRC; DDX3X; TP53; MAPK3; PRKCA; JUN; SMAD3; MAPK1; CDK2; GRB2; PCNA; IKBKG; PIK3R1; IKBKE; NFKB1; MYC; EP300	4609; 1654; 6714; 3725; 5295; 4790; 8517; 7534; 2885; 9641; 5578; 4088; 1017; 5594; 5595; 2033; 7157; 5111	144	144
3.77566e-13	1.18263e-11	Viral carcinogenesis - Homo sapiens (human)	KEGG	path:hsa05203	YWHAZ; SRC; SNW1; DDX3X; TP53; MAPK3; GRB2; JUN; CDK1; CDK2; HNRNPK; PRKACA; IKBKG; PIK3R1; NFKB1; MDM2; EP300; YWHAG; MAPK1; GSN	6714; 4193; 1654; 5295; 4790; 3190; 983; 2885; 3725; 7532; 7534; 2934; 22938; 8517; 5566; 5594; 5595; 2033; 7157; 1017	201	201
5.95691e-13	1.80755e-11	Prostate cancer - Homo sapiens (human)	KEGG	path:hsa05215	CTNNB1; TP53; EGFR; HSP90B1; HSP90AB1; MAPK3; CDK2; GRB2; IKBKG; PIK3R1; HSP90AA1; NFKB1; MDM2; EP300; MAPK1	4193; 5295; 4790; 7184; 3326; 5595; 2885; 8517; 1956; 3320; 5594; 1499; 2033; 7157; 1017	97	97
1.61615e-12	4.75541e-11	Intracellular signaling by second messengers	Reactome	R-HSA-9006925	SRC; RPS27A; TP53; TRAF6; PRKCA; EGFR; TRIM27; FYN; JUN; GRB2; MAPK3; UBA52; MAPK1; PRKACA; PRKAR1A; PIK3R1; UBC; MOV10; MDM2; LCK; CSNK2A1	3725; 5578; 2534; 1956; 1457; 5594; 4193; 5987; 7157; 3932; 6714; 5566; 5573; 4343; 5295; 2885; 7311; 5595; 7316; 7189; 6233	244	244
3.19599e-12	9.12738e-11	Epstein-Barr virus infection - Homo sapiens (human)	KEGG	path:hsa05169	YWHAZ; SNW1; TP53; TRAF6; YWHAG; HSPA8; JUN; VIM; CDK1; CDK2; POLR2A; IKBKG; PIK3R1; NFKB1; MYC; EP300; MDM2; CSNK2A1; PRKACA	4609; 7189; 4193; 3725; 5295; 4790; 3312; 7431; 5430; 8517; 1017; 7532; 7534; 22938; 1457; 5566; 983; 2033; 7157	203	199
3.38773e-12	9.39852e-11	Signaling by FGFR2	Reactome	R-HSA-5654738	SRC; RPS27A; HNRNPF; HNRNPA1; MAPK3; UBA52; GRB2; POLR2A; HNRNPM; PIK3R1; UBC; HNRNPH1; MAPK1	5430; 6714; 5595; 3187; 2885; 3178; 7316; 7311; 5594; 4670; 5295; 6233; 3185	73	73
3.82092e-12	1.03059e-10	Proteoglycans in cancer - Homo sapiens (human)	KEGG	path:hsa05205	ITGB1; SRC; MDM2; TP53; MAPK3; FN1; DDX5; PRKCA; EGFR; SMAD2; PAK1; CTNNB1; RPS6; GRB2; PRKACA; PIK3R1; MAPK1; MYC; ACTB	4609; 6194; 6714; 60; 3688; 1655; 5295; 2335; 1499; 2885; 1956; 5566; 7157; 5058; 5578; 5594; 5595; 4193; 4087	201	201
1.8232e-11	4.78466e-10	Transcriptional regulation by RUNX3	Reactome	R-HSA-8878159	SRC; SNW1; TP53; RPS27A; SMAD3; CTNNB1; UBA52; UBC; MDM2; EP300; MYC	7157; 22938; 7311; 6714; 4088; 7316; 2033; 4193; 4609; 6233; 1499	52	51
3.10098e-11	7.92383e-10	Pathways in cancer - Homo sapiens (human)	KEGG	path:hsa05200	EGFR; HSP90B1; SMAD3; CTNNB1; VHL; IKBKG; ABL1; JUN; HSP90AB1; MAPK3; MAPK1; PIK3R1; NFKB1; MYC; ITGB1; TRAF6; PRKCA; SP1; SMAD2; APC; MDM2; EP300; TP53; FN1; CDK2; GRB2; PRKACA; HSP90AA1	25; 4193; 2335; 324; 8517; 4609; 6667; 4790; 1499; 2885; 7157; 1017; 7184; 7189; 5295; 3320; 5566; 5578; 5594; 5595; 3326; 7428; 3688; 3725; 1956; 4087; 2033; 4088	526	526
3.47419e-11	8.64985e-10	Signaling by FGFR	Reactome	R-HSA-190236	SRC; RPS27A; GRB2; HNRNPA1; MAPK3; UBA52; MAPK1; POLR2A; HNRNPM; PIK3R1; UBC; HNRNPH1; HNRNPF	3185; 5430; 4670; 5594; 6714; 5295; 2885; 3178; 7311; 5595; 3187; 7316; 6233	87	87
5.38546e-11	1.30732e-09	Adherens junction - Homo sapiens (human)	KEGG	path:hsa04520	SRC; FYN; EGFR; SMAD2; SMAD3; CTNNB1; MAPK3; MAPK1; ACTB; EP300; VCL; CSNK2A1	4088; 5594; 6714; 1956; 2033; 1457; 60; 4087; 1499; 5595; 2534; 7414	72	72
5.55432e-11	1.31543e-09	MAPK family signaling cascades	Reactome	R-HSA-5683057	SRC; MYC; FN1; MAPK3; FYN; UBC; JUN; PHB; VCL; CDK1; UBA52; GRB2; PRKACA; ARRB1; ARRB2; EGFR; RPS27A; PAK1; MAPK1	3725; 409; 983; 408; 6714; 5566; 2335; 2534; 5058; 5245; 1956; 2885; 7311; 7414; 4609; 5594; 5595; 7316; 6233	235	234
9.53134e-11	2.20355e-09	PIP3 activates AKT signaling	Reactome	R-HSA-1257604	SRC; RPS27A; TP53; TRAF6; EGFR; TRIM27; FYN; JUN; GRB2; MAPK3; UBA52; MAPK1; PIK3R1; UBC; MOV10; MDM2; LCK; CSNK2A1	3725; 2534; 1956; 1457; 5594; 4193; 5987; 7157; 3932; 6714; 4343; 5295; 2885; 7311; 7189; 5595; 7316; 6233	213	213
9.88813e-11	2.23288e-09	Oncogene Induced Senescence	Reactome	R-HSA-2559585	TP53; SP1; RPS27A; MAPK3; UBA52; MAPK1; UBC; MOV10; MDM2	7157; 5594; 5595; 6667; 4343; 7316; 7311; 4193; 6233	32	32
1.62557e-10	3.58733e-09	Cellular responses to stress	Reactome	R-HSA-2262752	MOV10; HSPA5; EEF1A1; RPS27A; VHL; JUN; CDK2; HSP90AB1; MAPK3; MAPK1; NFKB1; NR3C1; HSPA8; SP1; VCP; MDM2; EP300; TP53; H2AFX; UBA52; UBC; HSP90AA1	4193; 3014; 3312; 5595; 7316; 2033; 1017; 6667; 3326; 2908; 7415; 7311; 3320; 3725; 7157; 4790; 1915; 6233; 5594; 3309; 4343; 7428	345	344
2.75946e-10	5.9543e-09	Focal adhesion - Homo sapiens (human)	KEGG	path:hsa04510	ITGB1; SRC; FN1; PRKCA; FYN; JUN; ILK; PAK1; CTNNB1; MAPK3; GRB2; PIK3R1; MAPK1; ACTB; VCL; ZYX; EGFR	3611; 2534; 6714; 60; 3688; 3725; 7791; 5295; 2335; 7414; 2885; 1956; 5058; 5578; 5594; 1499; 5595	199	199
3.46686e-10	7.31809e-09	Signaling by ERBB2	Reactome	R-HSA-1227986	SRC; PRKCA; FYN; RPS27A; EGFR; UBA52; GRB2; PIK3R1; UBC; HSP90AA1	5578; 6714; 2534; 3320; 1956; 2885; 7316; 7311; 5295; 6233	50	50
4.02902e-10	8.32378e-09	ErbB signaling pathway - Homo sapiens (human)	KEGG	path:hsa04012	SRC; NCK1; PRKCA; JUN; EGFR; MAPK3; GRB2; PIK3R1; ABL1; MAPK1; MYC; PAK1	4609; 3725; 2885; 25; 1956; 6714; 5058; 5578; 4690; 5594; 5595; 5295	85	85
4.26797e-10	8.63374e-09	Cytosolic sensors of pathogen-associated DNA	Reactome	R-HSA-1834949	DHX9; RPS27A; PRKDC; CTNNB1; UBA52; IKBKG; UBC; NFKB1; EP300; XRCC6	5591; 1499; 2547; 8517; 4790; 1660; 7316; 7311; 6233; 2033	51	51
4.63395e-10	9.18279e-09	Colorectal cancer - Homo sapiens (human)	KEGG	path:hsa05210	TP53; MAPK3; EGFR; JUN; SMAD2; SMAD3; CTNNB1; MAPK1; GRB2; PIK3R1; APC; MYC	4609; 3725; 5295; 1499; 2885; 324; 1956; 5594; 5595; 7157; 4087; 4088	86	86
5.34309e-10	1.02838e-08	Relaxin signaling pathway - Homo sapiens (human)	KEGG	path:hsa04926	SRC; MAPK3; PRKCA; EGFR; JUN; SMAD2; SMAD3; MAPK1; GRB2; ARRB2; PIK3R1; ARRB1; NFKB1; PRKACA	6714; 5295; 4790; 2885; 3725; 408; 409; 1956; 5566; 5578; 5594; 5595; 4087; 4088	130	130
5.40137e-10	1.02838e-08	Ovarian tumor domain proteases	Reactome	R-HSA-5689896	TP53; TRAF6; RPS27A; VCP; CDK1; UBA52; IKBKG; UBC; APC	7157; 983; 7189; 8517; 7415; 7316; 7311; 324; 6233	38	38
6.69324e-10	1.24983e-08	Cell Cycle	Reactome	R-HSA-1640170	RPS27A; ABL1; MDM2; YWHAZ; CDK2; HSP90AB1; MAPK3; GOLGA2; MAPK1; MYC; YWHAG; TOP2A; PCNA; SRC; PRKCA; LMNA; EP300; NPM1; CSNK2A1; TP53; H2AFX; TUBB; CDK1; UBA52; PRKACA; UBC; HSP90AA1	5578; 1457; 4869; 3014; 4000; 6714; 5595; 7316; 983; 3326; 2033; 7311; 3320; 2801; 1017; 7157; 25; 5111; 4609; 6233; 5594; 7532; 5566; 7153; 4193; 7534; 203068	561	560
9.37279e-10	1.71717e-08	Pathogenic Escherichia coli infection - Homo sapiens (human)	KEGG	path:hsa05130	ITGB1; YWHAZ; NCK1; PRKCA; FYN; TUBB; CTNNB1; NCL; ABL1; ACTB	25; 1499; 203068; 5578; 60; 4690; 4691; 2534; 3688; 7534	55	55
1.39798e-09	2.51378e-08	Signaling by Receptor Tyrosine Kinases	Reactome	R-HSA-9006934	RPS27A; EGFR; CTNNB1; HNRNPH1; FYN; MAPK3; MAPK1; HNRNPM; PIK3R1; HNRNPF; ITGB1; SRC; PRKCA; HNRNPA1; POLR2A; NCK1; PAK1; UBA52; GRB2; PRKACA; UBC; HSP90AA1; LCK	5578; 2885; 5595; 7316; 1499; 5430; 2534; 3185; 4690; 5058; 3932; 7311; 3320; 3187; 6714; 3178; 6233; 3688; 1956; 4670; 5594; 5566; 5295	422	422
1.47732e-09	2.60814e-08	PI3K-Akt signaling pathway - Homo sapiens (human)	KEGG	path:hsa04151	YWHAZ; ITGB1; TP53; FN1; MAPK3; PRKCA; EGFR; HSP90B1; YWHAG; HSP90AB1; RPS6; CDK2; GRB2; IKBKG; PIK3R1; HSP90AA1; NFKB1; MDM2; PKN1; MYC; MAPK1	6194; 4193; 2335; 8517; 4609; 4790; 2885; 7532; 7157; 1017; 7184; 5295; 3320; 3326; 7534; 5578; 5585; 5594; 5595; 3688; 1956	352	351
1.62091e-09	2.81055e-08	Endometrial cancer - Homo sapiens (human)	KEGG	path:hsa05213	TP53; MAPK3; EGFR; ILK; CTNNB1; MAPK1; GRB2; PIK3R1; APC; MYC	4609; 324; 3611; 1499; 1956; 5295; 2885; 5594; 5595; 7157	58	58
1.67762e-09	2.83109e-08	Signaling by Interleukins	Reactome	R-HSA-449147	YWHAZ; DHX9; TRAF6; GRB2; RPS27A; FYN; JUN; SMAD3; MAPK3; UBA52; MAPK1; PRKACA; IKBKG; PIK3R1; UBC; NFKB1; SMARCA4; LCK	2885; 5594; 4790; 4088; 5566; 6597; 5295; 2534; 3932; 8517; 7311; 7189; 5595; 1660; 7316; 7534; 6233; 3725	254	254
1.69107e-09	2.83109e-08	Chronic myeloid leukemia - Homo sapiens (human)	KEGG	path:hsa05220	TP53; MAPK3; SMAD3; MAPK1; GRB2; IKBKG; PIK3R1; ABL1; NFKB1; MYC; MDM2	4609; 25; 2885; 5295; 4790; 8517; 4088; 5594; 5595; 4193; 7157	76	76
1.90555e-09	3.13608e-08	Axon guidance	Reactome	R-HSA-422475	ITGB1; SRC; RPS27A; NCK1; MAPK1; PRKCA; EGFR; HSPA8; FYN; MYH10; HSP90AB1; MAPK3; UBA52; GRB2; PRKACA; UBC; ABL1; HSP90AA1; ACTB; PAK1; CSNK2A1	4690; 5578; 1457; 6714; 2885; 5595; 7316; 2534; 3326; 60; 5058; 7311; 3312; 25; 6233; 3688; 3320; 1956; 4628; 5594; 5566	357	356
2.4207e-09	3.91751e-08	erk and pi-3 kinase are necessary for collagen binding in corneal epithelia	BioCarta	ecmpathway	ITGB1; SRC; VCL; MAPK3; MAPK1; PIK3R1; ZYX; GSN	7414; 7791; 6714; 5595; 5594; 2934; 5295; 3688	31	31
3.02684e-09	4.74464e-08	Signal Transduction	Reactome	R-HSA-162582	MYH10; MOV10; JUN; RPS27A; EGFR; SMAD2; SMAD3; CTNNB1; RPS6; ARRB2; IKBKG; ARRB1; ABL1; SMARCA4; YWHAZ; CDK1; FYN; UBA52; HSP90AA1; HSP90AB1; PRKCA; MAPK1; HNRNPM; PIK3R1; NFKB1; MYC; YWHAG; HNRNPF; ITGB1; SRC; NR3C1; HNRNPA1; MAPK3; TRAF6; PKN1; SP1; TRIM27; VCL; PARP1; VCP; SFPQ; LRP1; POLR2A; PRKAR1A; APC; MDM2; EP300; CSNK2A1; SNW1; TP53; NCK1; FN1; PHB; H2AFX; LCK; DDX5; CDK2; GRB2; PRKACA; …	4193; 4087; 2534; 3185; 2033; 5058; 409; 4790; 5585; 6233; 3688; 3187; 1956; 7532; 8517; 142; 408; 3014; 6714; 2885; 22938; 7316; 1017; 5430; 4035; 3326; 4088; 4690; 1655; 324; 6421; 4609; 4670; 5594; 1457; 6597; 2335; 983; 3932; 5245; 7311; 6194; 7189; 3320; 3725; 5987; 7157; 25; 3178; 4628; 5566; 5578; 1499; 5595; 6667; 7415; 60; 5573; 4904; 7534; 4343; 5295; 2908; 7414	2643	2629
3.02954e-09	4.74464e-08	Cell Cycle, Mitotic	Reactome	R-HSA-69278	RPS27A; ABL1; CDK2; HSP90AB1; MAPK3; GOLGA2; MAPK1; MYC; YWHAG; TOP2A; PCNA; SRC; PRKCA; LMNA; EP300; CSNK2A1; TP53; H2AFX; TUBB; CDK1; UBA52; PRKACA; UBC; HSP90AA1	5578; 1457; 3014; 4000; 6714; 5595; 7316; 1017; 983; 3326; 2033; 7311; 3320; 2801; 7157; 25; 5111; 4609; 6233; 5594; 7532; 5566; 7153; 203068	479	478
3.17087e-09	4.88716e-08	Cell cycle - Homo sapiens (human)	KEGG	path:hsa04110	YWHAZ; PCNA; EP300; TP53; SMAD2; YWHAG; PRKDC; CDK1; CDK2; ABL1; MYC; SMAD3; MDM2	4609; 25; 4193; 7532; 7534; 5111; 7157; 4087; 4088; 983; 5591; 2033; 1017	124	124
3.8057e-09	5.77396e-08	RNA Polymerase II Transcription	Reactome	R-HSA-73857	MOV10; LRPPRC; SSRP1; RPS27A; EGFR; SMAD2; SMAD3; CTNNB1; ABL1; NUDT21; SMARCA4; YWHAZ; HSPD1; U2AF1; U2AF2; JUN; CDK2; MAPK3; MAPK1; MYC; YWHAG; PCNA; SRC; NR3C1; SP1; PARP1; POLR2A; MDM2; EP300; NPM1; CSNK2A1; UBE2I; SNW1; TP53; SRRM1; H2AFX; CDK1; UBA52; UBC; EIF4A3	1457; 4193; 4869; 3014; 6714; 6597; 22938; 11338; 5595; 7316; 983; 6667; 4087; 11051; 2033; 10128; 7311; 5430; 142; 3725; 7157; 10250; 1017; 7329; 25; 3329; 6749; 4088; 1499; 7307; 5111; 4609; 6233; 1956; 5594; 7532; 2908; 9775; 7534; 4343	1235	1227
4.17387e-09	6.23512e-08	role of egf receptor transactivation by gpcrs in cardiac hypertrophy	BioCarta	cardiacegfpathway	PRKCA; JUN; EGFR; MAPK3; GRB2; IKBKG; MAPK1; MYC	3725; 5578; 2885; 5595; 1956; 8517; 5594; 4609	33	33
4.60381e-09	6.77317e-08	Regulation of RUNX3 expression and activity	Reactome	R-HSA-8941858	SRC; RPS27A; UBA52; UBC; MDM2; EP300	7316; 7311; 6714; 4193; 6233; 2033	13	13
5.03761e-09	7.30078e-08	Cellular responses to external stimuli	Reactome	R-HSA-8953897	MOV10; HSPA5; EEF1A1; RPS27A; VHL; JUN; CDK2; HSP90AB1; MAPK3; MAPK1; NFKB1; NR3C1; HSPA8; SP1; VCP; MDM2; EP300; TP53; H2AFX; UBA52; UBC; HSP90AA1	4193; 3014; 3312; 5595; 7316; 1017; 6667; 3326; 2908; 7415; 2033; 7311; 3320; 3725; 7157; 4790; 1915; 6233; 5594; 3309; 4343; 7428	414	413
5.17183e-09	7.38506e-08	Shigellosis - Homo sapiens (human)	KEGG	path:hsa05131	ITGB1; SRC; U2AF1; VCL; MAPK3; MAPK1; IKBKG; ABL1; NFKB1; ACTB	7307; 25; 8517; 4790; 6714; 60; 7414; 5594; 5595; 3688	65	65
6.93162e-09	9.7545e-08	angiotensin ii mediated activation of jnk pathway via pyk2 dependent signaling	BioCarta	at1rpathway	SRC; PRKCA; JUN; EGFR; MAPK3; GRB2; MAPK1; PAK1	3725; 5578; 6714; 5595; 1956; 2885; 5594; 5058	35	35
7.37918e-09	1.0236e-07	Gene expression (Transcription)	Reactome	R-HSA-74160	MOV10; LRPPRC; SSRP1; RPS27A; EGFR; SMAD2; SMAD3; CTNNB1; ABL1; NUDT21; SMARCA4; YWHAZ; HSPD1; U2AF1; U2AF2; JUN; UBA52; MAPK3; MAPK1; SP1; MYC; YWHAG; PCNA; SRC; NR3C1; SF3B1; PARP1; POLR2A; MDM2; EP300; NPM1; CSNK2A1; UBE2I; SNW1; TP53; SRRM1; H2AFX; CDK1; CDK2; UBC; ACTB; EIF4A3	4193; 11338; 4087; 2033; 10128; 7307; 6233; 1956; 7532; 3014; 6714; 22938; 5595; 7316; 1017; 5430; 4088; 142; 6749; 4609; 5594; 7534; 1457; 6597; 983; 7311; 3725; 7157; 10250; 7329; 25; 5111; 9775; 4869; 23451; 1499; 6667; 11051; 60; 3329; 4343; 2908	1372	1363
8.82109e-09	1.20638e-07	Signaling by RAS mutants	Reactome	R-HSA-6802949	SRC; FN1; PHB; VCL; MAPK3; MAPK1; ARRB2; ARRB1	5245; 7414; 6714; 5595; 5594; 409; 408; 2335	36	36
9.86939e-09	1.331e-07	Estrogen signaling pathway - Homo sapiens (human)	KEGG	path:hsa04915	SRC; MAPK3; SP1; HSPA8; JUN; HSP90B1; HSP90AB1; MAPK1; GRB2; PRKACA; PIK3R1; HSP90AA1; EGFR	6667; 7184; 6714; 3725; 5295; 3312; 3326; 2885; 1956; 5566; 3320; 5594; 5595	137	136
1.05499e-08	1.40328e-07	mechanism of gene regulation by peroxisome proliferators via ppara	BioCarta	pparapathway	PRKCA; SP1; JUN; MAPK3; MAPK1; PRKAR1A; HSP90AA1; MYC; EP300	3320; 3725; 5578; 5573; 6667; 5594; 2033; 4609; 5595	52	52
1.10646e-08	1.45186e-07	Innate Immune System	Reactome	R-HSA-168249	SRC; JUN; HSPA8; HSP90B1; PRKDC; CTNNB1; IKBKG; IKBKE; ABL1; GSN; FYN; HSP90AB1; MAPK3; MAPK1; PIK3R1; EEF1A1; NFKB1; XRCC6; DHX9; RPS27A; DDX3X; TRAF6; VCL; VCP; EP300; NCK1; TUBB; PAK1; UBA52; GRB2; PRKACA; UBC; HSP90AA1; ACTB; LCK; ILF2	1654; 2934; 3312; 2885; 1499; 1660; 7316; 9641; 2033; 3326; 4690; 7184; 7415; 60; 3932; 7311; 7189; 3320; 3725; 5591; 4790; 2534; 25; 6714; 1915; 6233; 5058; 2547; 5594; 5566; 5295; 5595; 8517; 7414; 3608; 203068	1077	1065
1.34301e-08	1.7386e-07	SMAD2/SMAD3:SMAD4 heterotrimer regulates transcription	Reactome	R-HSA-2173796	SNW1; SP1; RPS27A; SMAD2; SMAD3; UBA52; UBC	22938; 7311; 4088; 6667; 4087; 7316; 6233	25	25
1.39661e-08	1.7386e-07	Paradoxical activation of RAF signaling by kinase inactive BRAF	Reactome	R-HSA-6802955	SRC; FN1; PHB; VCL; MAPK3; MAPK1; ARRB2; ARRB1	5245; 6714; 5595; 5594; 409; 408; 7414; 2335	38	38
1.39661e-08	1.7386e-07	Signaling by moderate kinase activity BRAF mutants	Reactome	R-HSA-6802946	SRC; FN1; PHB; VCL; MAPK3; MAPK1; ARRB2; ARRB1	5245; 7414; 6714; 5595; 5594; 409; 408; 2335	38	38
1.39661e-08	1.7386e-07	Transcriptional activity of SMAD2/SMAD3:SMAD4 heterotrimer	Reactome	R-HSA-2173793	SNW1; SP1; RPS27A; PARP1; SMAD2; SMAD3; UBA52; UBC	6667; 22938; 7311; 4088; 4087; 7316; 142; 6233	38	38
1.52604e-08	1.87436e-07	Thyroid hormone signaling pathway - Homo sapiens (human)	KEGG	path:hsa04919	SRC; TP53; PRKCA; CTNNB1; MAPK3; MAPK1; MDM2; PIK3R1; PRKACA; MYC; EP300; ACTB	4609; 6714; 4193; 5295; 1499; 60; 5566; 5578; 5594; 5595; 2033; 7157	116	116
1.54427e-08	1.87436e-07	Hepatocellular carcinoma - Homo sapiens (human)	KEGG	path:hsa05225	TP53; MAPK3; PRKCA; EGFR; SMAD2; SMAD3; CTNNB1; MAPK1; GRB2; PIK3R1; APC; MYC; SMARCA4; ACTB	4609; 5295; 60; 1499; 324; 2885; 1956; 6597; 5578; 5594; 5595; 7157; 4087; 4088	168	168
1.73909e-08	2.08477e-07	MAPK6/MAPK4 signaling	Reactome	R-HSA-5687128	RPS27A; JUN; CDK1; UBA52; PRKACA; UBC; MYC; PAK1	3725; 983; 5566; 7316; 7311; 4609; 6233; 5058	39	39
1.81922e-08	2.15422e-07	links between pyk2 and map kinases	BioCarta	pyk2pathway	SRC; PRKCA; JUN; MAPK3; GRB2; MAPK1; PAK1	3725; 5578; 6714; 5595; 2885; 5594; 5058	26	26
1.93453e-08	2.26317e-07	MAPK1/MAPK3 signaling	Reactome	R-HSA-5684996	SRC; RPS27A; FN1; MAPK3; PHB; UBC; FYN; GRB2; CDK1; UBA52; MAPK1; ARRB2; ARRB1; EGFR; VCL	409; 983; 408; 5594; 6714; 2335; 2534; 5245; 1956; 2885; 7311; 7414; 5595; 7316; 6233	201	200
2.04061e-08	2.35884e-07	Signaling by NOTCH	Reactome	R-HSA-157118	SNW1; TP53; UBC; RPS27A; EGFR; UBA52; ARRB2; ARRB1; MOV10; MYC; EP300; YBX1	1956; 4904; 408; 7157; 4343; 2033; 7311; 4609; 22938; 6233; 409; 7316	120	119
2.15168e-08	2.45798e-07	Signaling by FGFR3	Reactome	R-HSA-5654741	SRC; RPS27A; MAPK3; UBA52; GRB2; PIK3R1; UBC; MAPK1	6714; 5595; 2885; 7316; 7311; 5594; 5295; 6233	40	40
2.36159e-08	2.6664e-07	Toll Like Receptor 3 (TLR3) Cascade	Reactome	R-HSA-168164	DHX9; RPS27A; TRAF6; UBC; JUN; MAPK3; UBA52; MAPK1; IKBKG; IKBKE; NFKB1	3725; 5594; 4790; 9641; 8517; 7311; 7189; 5595; 1660; 7316; 6233	97	97
2.64602e-08	2.9532e-07	Signaling by FGFR4	Reactome	R-HSA-5654743	SRC; RPS27A; MAPK3; UBA52; GRB2; PIK3R1; UBC; MAPK1	6714; 5595; 2885; 7316; 7311; 5594; 5295; 6233	41	41
3.20868e-08	3.54048e-07	role of erbb2 in signal transduction and oncology	BioCarta	her2pathway	LRPPRC; EGFR; MAPK3; GRB2; PIK3R1; MAPK1; EP300	5595; 1956; 2885; 10128; 5594; 5295; 2033	28	28
3.62006e-08	3.86273e-07	TRIF(TICAM1)-mediated TLR4 signaling	Reactome	R-HSA-937061	DHX9; RPS27A; TRAF6; UBC; JUN; MAPK3; UBA52; MAPK1; IKBKG; IKBKE; NFKB1	3725; 5594; 4790; 9641; 8517; 7311; 7189; 5595; 1660; 7316; 6233	101	101
3.62006e-08	3.86273e-07	MyD88-independent TLR4 cascade	Reactome	R-HSA-166166	DHX9; RPS27A; TRAF6; UBC; JUN; MAPK3; UBA52; MAPK1; IKBKG; IKBKE; NFKB1	3725; 5594; 4790; 9641; 8517; 7311; 7189; 5595; 1660; 7316; 6233	101	101
3.62006e-08	3.86273e-07	T cell receptor signaling pathway - Homo sapiens (human)	KEGG	path:hsa04660	NCK1; MAPK3; FYN; JUN; PAK1; MAPK1; GRB2; IKBKG; PIK3R1; NFKB1; LCK	4690; 2885; 3725; 5295; 4790; 8517; 3932; 2534; 5058; 5594; 5595	101	101
4.18684e-08	4.41894e-07	Negative regulation of FGFR3 signaling	Reactome	R-HSA-5654732	SRC; RPS27A; MAPK3; UBA52; GRB2; UBC; MAPK1	6714; 5595; 2885; 7316; 7311; 5594; 6233	29	29
4.53177e-08	4.73156e-07	Oncogenic MAPK signaling	Reactome	R-HSA-6802957	SRC; FN1; PHB; VCL; MAPK3; MAPK1; ARRB2; ARRB1; LMNA	7414; 5245; 4000; 6714; 5595; 5594; 409; 408; 2335	61	61
6.85404e-08	7.06478e-07	Regulation of TP53 Activity through Methylation	Reactome	R-HSA-6804760	TP53; RPS27A; UBA52; UBC; MDM2; EP300	7316; 7311; 4193; 6233; 7157; 2033	19	19
6.91199e-08	7.06478e-07	Negative regulation of FGFR4 signaling	Reactome	R-HSA-5654733	SRC; RPS27A; MAPK3; UBA52; GRB2; UBC; MAPK1	6714; 5595; 2885; 7316; 7311; 5594; 6233	31	31
8.01589e-08	8.02079e-07	MAP kinase activation	Reactome	R-HSA-450294	TRAF6; RPS27A; JUN; MAPK3; UBA52; MAPK1; IKBKG; UBC; NFKB1	3725; 4790; 7189; 5595; 8517; 7316; 7311; 5594; 6233	65	65
8.01589e-08	8.02079e-07	Interleukin-17 signaling	Reactome	R-HSA-448424	TRAF6; RPS27A; JUN; MAPK3; UBA52; MAPK1; IKBKG; UBC; NFKB1	3725; 4790; 7189; 5595; 8517; 7316; 7311; 5594; 6233	65	65
8.09513e-08	8.02079e-07	Generic Transcription Pathway	Reactome	R-HSA-212436	MOV10; LRPPRC; SSRP1; RPS27A; EGFR; SMAD2; SMAD3; CTNNB1; ABL1; SMARCA4; YWHAZ; MAPK3; JUN; UBA52; HSPD1; MAPK1; MYC; YWHAG; PCNA; SRC; NR3C1; SP1; PARP1; POLR2A; MDM2; EP300; NPM1; CSNK2A1; UBE2I; SNW1; TP53; H2AFX; CDK1; CDK2; UBC	1457; 4193; 4869; 3014; 6714; 6597; 22938; 5430; 1499; 7316; 983; 6667; 4087; 2033; 10128; 7311; 3725; 4343; 1017; 7157; 7329; 25; 3329; 6749; 4088; 5111; 4609; 6233; 1956; 5594; 7532; 2908; 5595; 142; 7534	1106	1098
9.20294e-08	8.84758e-07	MyD88 cascade initiated on plasma membrane	Reactome	R-HSA-975871	DHX9; TRAF6; RPS27A; JUN; MAPK3; UBA52; MAPK1; IKBKG; UBC; NFKB1	3725; 5594; 4790; 8517; 7311; 7189; 5595; 1660; 7316; 6233	87	87
9.20294e-08	8.84758e-07	Toll Like Receptor 10 (TLR10) Cascade	Reactome	R-HSA-168142	DHX9; TRAF6; RPS27A; JUN; MAPK3; UBA52; MAPK1; IKBKG; UBC; NFKB1	3725; 5594; 4790; 8517; 7311; 7189; 5595; 1660; 7316; 6233	87	87
9.20294e-08	8.84758e-07	Toll Like Receptor 5 (TLR5) Cascade	Reactome	R-HSA-168176	DHX9; TRAF6; RPS27A; JUN; MAPK3; UBA52; MAPK1; IKBKG; UBC; NFKB1	3725; 5594; 4790; 8517; 7311; 7189; 5595; 1660; 7316; 6233	87	87
9.53715e-08	9.079e-07	RAF/MAP kinase cascade	Reactome	R-HSA-5673001	ARRB1; SRC; RPS27A; FN1; EGFR; UBC; FYN; GRB2; MAPK3; UBA52; MAPK1; ARRB2; PHB; VCL	409; 1956; 5594; 6714; 2335; 2534; 5245; 2885; 7311; 7414; 5595; 7316; 408; 6233	195	194
9.72603e-08	9.11356e-07	agrin in postsynaptic differentiation	BioCarta	agrpathway	ITGB1; SRC; JUN; EGFR; MAPK3; MAPK1; SP1; PAK1	3725; 6714; 5595; 1956; 6667; 5594; 3688; 5058	48	48
9.76118e-08	9.11356e-07	Developmental Biology	Reactome	R-HSA-1266738	MYH10; HSPA8; EGFR; SMAD2; SMAD3; CTNNB1; ABL1; FYN; HSP90AB1; MAPK3; MAPK1; ITGB1; SRC; RPS27A; PRKCA; EP300; CSNK2A1; NCK1; UBA52; GRB2; PRKACA; UBC; HSP90AA1; ACTB; PAK1	4690; 5578; 1457; 6714; 2885; 1499; 4087; 7316; 5058; 5595; 2534; 3326; 4088; 2033; 60; 7311; 3312; 3320; 25; 6233; 3688; 1956; 4628; 5594; 5566	618	617
9.91455e-08	9.1686e-07	G2/M Transition	Reactome	R-HSA-69275	TP53; RPS27A; UBA52; TUBB; HSP90AB1; CDK1; CDK2; PRKACA; UBC; HSP90AA1; EP300; YWHAG	1017; 983; 3326; 7157; 5566; 2033; 7532; 6233; 7311; 3320; 7316; 203068	137	137
1.02758e-07	9.41306e-07	TRAF6 mediated induction of NFkB and MAP kinases upon TLR7/8 or 9 activation	Reactome	R-HSA-975138	DHX9; TRAF6; RPS27A; JUN; MAPK3; UBA52; MAPK1; IKBKG; UBC; NFKB1	3725; 5594; 4790; 8517; 7311; 7189; 5595; 1660; 7316; 6233	88	88
1.09185e-07	9.89288e-07	Deubiquitination	Reactome	R-HSA-5688426	ARRB1; TP53; ACTB; TRAF6; RPS27A; SMAD2; SMAD3; VCP; CDK1; UBA52; ARRB2; IKBKG; UBC; APC; MYC; EP300; MDM2	983; 408; 7415; 7316; 7157; 6233; 4088; 2033; 8517; 4609; 7311; 7189; 4193; 409; 4087; 324; 60	296	296
1.10034e-07	9.89288e-07	Negative regulation of FGFR1 signaling	Reactome	R-HSA-5654726	SRC; RPS27A; MAPK3; UBA52; GRB2; UBC; MAPK1	6714; 5595; 2885; 7316; 7311; 5594; 6233	33	33
1.16403e-07	1.03695e-06	Mitotic G2-G2/M phases	Reactome	R-HSA-453274	TP53; RPS27A; UBA52; TUBB; HSP90AB1; CDK1; CDK2; PRKACA; UBC; HSP90AA1; EP300; YWHAG	1017; 983; 3326; 7157; 5566; 2033; 7532; 6233; 7311; 3320; 7316; 203068	139	139
1.27567e-07	1.11592e-06	MyD88 dependent cascade initiated on endosome	Reactome	R-HSA-975155	DHX9; TRAF6; RPS27A; JUN; MAPK3; UBA52; MAPK1; IKBKG; UBC; NFKB1	3725; 5594; 4790; 8517; 7311; 7189; 5595; 1660; 7316; 6233	90	90
1.27567e-07	1.11592e-06	Toll Like Receptor 7/8 (TLR7/8) Cascade	Reactome	R-HSA-168181	DHX9; TRAF6; RPS27A; JUN; MAPK3; UBA52; MAPK1; IKBKG; UBC; NFKB1	3725; 5594; 4790; 8517; 7311; 7189; 5595; 1660; 7316; 6233	90	90
1.3436e-07	1.13832e-06	Downregulation of SMAD2/3:SMAD4 transcriptional activity	Reactome	R-HSA-2173795	RPS27A; PARP1; SMAD2; SMAD3; UBA52; UBC	7316; 142; 7311; 4088; 6233; 4087	21	21
1.3436e-07	1.13832e-06	p53-Dependent G1 DNA Damage Response	Reactome	R-HSA-69563	TP53; RPS27A; UBA52; CDK2; UBC; MDM2	7316; 7157; 7311; 4193; 6233; 1017	21	21
1.3436e-07	1.13832e-06	p53-Dependent G1/S DNA damage checkpoint	Reactome	R-HSA-69580	TP53; RPS27A; UBA52; CDK2; UBC; MDM2	7316; 7157; 7311; 4193; 6233; 1017	21	21
1.3557e-07	1.13832e-06	Signaling by FGFR1	Reactome	R-HSA-5654736	SRC; RPS27A; MAPK3; UBA52; GRB2; PIK3R1; UBC; MAPK1	6714; 5595; 2885; 7316; 7311; 5594; 5295; 6233	50	50
1.37161e-07	1.13832e-06	Negative regulation of FGFR2 signaling	Reactome	R-HSA-5654727	SRC; RPS27A; MAPK3; UBA52; GRB2; UBC; MAPK1	6714; 5595; 2885; 7316; 7311; 5594; 6233	34	34
1.37161e-07	1.13832e-06	Signaling by high-kinase activity BRAF mutants	Reactome	R-HSA-6802948	SRC; FN1; VCL; MAPK3; MAPK1; ARRB2; ARRB1	6714; 5595; 5594; 409; 408; 7414; 2335	34	34
1.74656e-07	1.43721e-06	IL-17 signaling pathway - Homo sapiens (human)	KEGG	path:hsa04657	TRAF6; IKBKE; JUN; HSP90B1; HSP90AB1; MAPK3; MAPK1; IKBKG; HSP90AA1; NFKB1	7184; 7189; 3725; 4790; 3320; 3326; 8517; 9641; 5594; 5595	93	93
1.81337e-07	1.47965e-06	Stabilization of p53	Reactome	R-HSA-69541	UBA52; RPS27A; TP53; MDM2; UBC	7316; 7157; 7311; 4193; 6233	12	12
1.82903e-07	1.47999e-06	Signal transduction by L1	Reactome	R-HSA-445144	ITGB1; EGFR; MAPK3; MAPK1; PAK1; CSNK2A1	5594; 5595; 1956; 1457; 3688; 5058	22	22
1.86171e-07	1.49398e-06	mRNA Splicing - Minor Pathway	Reactome	R-HSA-72165	SNRNP200; SNRPD2; SF3B1; SF3B3; SF3B2; POLR2A; YBX1; PRPF6	24148; 23450; 10992; 5430; 23020; 4904; 6633; 23451	52	52
1.93435e-07	1.53955e-06	Toll Like Receptor 9 (TLR9) Cascade	Reactome	R-HSA-168138	DHX9; TRAF6; RPS27A; JUN; MAPK3; UBA52; MAPK1; IKBKG; UBC; NFKB1	3725; 5594; 4790; 8517; 7311; 7189; 5595; 1660; 7316; 6233	94	94
2.08555e-07	1.6464e-06	Regulation of TP53 Degradation	Reactome	R-HSA-6804757	TP53; RPS27A; UBA52; CDK1; CDK2; UBC; MDM2	7157; 1017; 983; 7316; 7311; 4193; 6233	36	36
2.17032e-07	1.6995e-06	keratinocyte differentiation	BioCarta	keratinocytepathway	PRKCA; JUN; EGFR; MAPK3; GRB2; IKBKG; SP1; MAPK1	3725; 5578; 5595; 8517; 1956; 2885; 6667; 5594	53	53
2.36385e-07	1.83624e-06	PTEN Regulation	Reactome	R-HSA-6807070	RPS27A; TP53; TRIM27; JUN; MAPK3; UBA52; MAPK1; UBC; MOV10; CSNK2A1	3725; 1457; 5594; 5987; 7157; 4343; 7311; 5595; 7316; 6233	96	96
2.4499e-07	1.88798e-06	G1/S DNA Damage Checkpoints	Reactome	R-HSA-69615	TP53; RPS27A; UBA52; CDK2; UBC; MDM2	7157; 1017; 7316; 7311; 4193; 6233	23	23
2.49749e-07	1.90434e-06	Gastric cancer - Homo sapiens (human)	KEGG	path:hsa05226	TP53; EGFR; SMAD2; SMAD3; CTNNB1; MAPK3; CDK2; GRB2; PIK3R1; APC; MYC; MAPK1	4609; 5295; 5595; 324; 4087; 2885; 1956; 5594; 1499; 7157; 4088; 1017	149	149
2.54619e-07	1.90434e-06	trefoil factors initiate mucosal healing	BioCarta	tffpathway	EGFR; CTNNB1; MAPK3; GRB2; IKBKG; PIK3R1; MAPK1	2885; 5595; 1956; 8517; 5594; 5295; 1499	37	37
2.54619e-07	1.90434e-06	Regulation of TP53 Expression and Degradation	Reactome	R-HSA-6806003	TP53; RPS27A; UBA52; CDK1; CDK2; UBC; MDM2	7157; 1017; 983; 7316; 7311; 4193; 6233	37	37
2.60841e-07	1.90434e-06	MyD88:Mal cascade initiated on plasma membrane	Reactome	R-HSA-166058	DHX9; TRAF6; RPS27A; JUN; MAPK3; UBA52; MAPK1; IKBKG; UBC; NFKB1	3725; 5594; 4790; 8517; 7311; 7189; 5595; 1660; 7316; 6233	97	97
2.60841e-07	1.90434e-06	Toll Like Receptor TLR1:TLR2 Cascade	Reactome	R-HSA-168179	DHX9; TRAF6; RPS27A; JUN; MAPK3; UBA52; MAPK1; IKBKG; UBC; NFKB1	3725; 5594; 4790; 8517; 7311; 7189; 5595; 1660; 7316; 6233	97	97
2.60841e-07	1.90434e-06	Toll Like Receptor TLR6:TLR2 Cascade	Reactome	R-HSA-168188	DHX9; TRAF6; RPS27A; JUN; MAPK3; UBA52; MAPK1; IKBKG; UBC; NFKB1	3725; 5594; 4790; 8517; 7311; 7189; 5595; 1660; 7316; 6233	97	97
2.60841e-07	1.90434e-06	Toll Like Receptor 2 (TLR2) Cascade	Reactome	R-HSA-181438	DHX9; TRAF6; RPS27A; JUN; MAPK3; UBA52; MAPK1; IKBKG; UBC; NFKB1	3725; 5594; 4790; 8517; 7311; 7189; 5595; 1660; 7316; 6233	97	97
2.84078e-07	2.04326e-06	Pancreatic cancer - Homo sapiens (human)	KEGG	path:hsa05212	TP53; EGFR; SMAD2; SMAD3; MAPK3; MAPK1; IKBKG; PIK3R1; NFKB1	1956; 5295; 4790; 8517; 4088; 4087; 5594; 5595; 7157	75	75
2.84078e-07	2.04326e-06	Transcriptional regulation by RUNX2	Reactome	R-HSA-8878166	SRC; NR3C1; MAPK3; RPS27A; CDK1; UBA52; MAPK1; UBC; ABL1	2908; 983; 6714; 5595; 25; 7316; 7311; 5594; 6233	75	75
2.90628e-07	2.06813e-06	DNA Repair	Reactome	R-HSA-73894	UBE2I; PCNA; TP53; PRPF19; RPS27A; H2AFX; UBA52; PRKDC; VCP; CDK2; PARP1; POLR2A; UBC; ABL1; ACTB; EP300; XRCC6	1017; 5591; 2547; 27339; 7157; 3014; 25; 7415; 2033; 60; 7329; 7311; 5430; 5111; 7316; 142; 6233	320	317
2.91796e-07	2.06813e-06	NF-kB is activated and signals survival	Reactome	R-HSA-209560	NFKB1; UBA52; RPS27A; TRAF6; UBC	7316; 7189; 7311; 6233; 4790	13	13
3.0896e-07	2.17392e-06	MAP2K and MAPK activation	Reactome	R-HSA-5674135	SRC; FN1; VCL; MAPK3; MAPK1; ARRB2; ARRB1	5594; 6714; 5595; 409; 408; 7414; 2335	38	38
3.17665e-07	2.21909e-06	Human papillomavirus infection - Homo sapiens (human)	KEGG	path:hsa05165	ITGB1; TP53; FN1; IKBKE; EGFR; CTNNB1; MAPK3; CDK2; GRB2; PRKACA; IKBKG; PIK3R1; APC; NFKB1; MDM2; EP300; MAPK1	5295; 4193; 3688; 4790; 2335; 5595; 324; 8517; 1956; 9641; 5566; 2885; 5594; 1499; 2033; 7157; 1017	319	319
3.23397e-07	2.24299e-06	tumor suppressor arf inhibits ribosomal biogenesis	BioCarta	arfpathway	TP53; PIK3R1; ABL1; HSP90AA1; MDM2; MYC	7157; 3320; 25; 4193; 5295; 4609	24	24
3.48044e-07	2.39682e-06	HIF-1 signaling pathway - Homo sapiens (human)	KEGG	path:hsa04066	RPS6; PRKCA; EGFR; GAPDH; VHL; MAPK1; PIK3R1; NFKB1; EP300; MAPK3	2597; 6194; 5295; 4790; 7428; 1956; 5578; 5594; 5595; 2033	100	100
3.57708e-07	2.44601e-06	Toll-Like Receptors Cascades	Reactome	R-HSA-168898	DHX9; RPS27A; TRAF6; UBC; JUN; HSP90B1; MAPK3; UBA52; MAPK1; IKBKG; IKBKE; NFKB1	3725; 5594; 4790; 7184; 9641; 8517; 7311; 7189; 5595; 1660; 7316; 6233	154	154
3.86784e-07	2.62634e-06	Toll Like Receptor 4 (TLR4) Cascade	Reactome	R-HSA-166016	DHX9; RPS27A; TRAF6; UBC; JUN; MAPK3; UBA52; MAPK1; IKBKG; IKBKE; NFKB1	3725; 5594; 4790; 9641; 8517; 7311; 7189; 5595; 1660; 7316; 6233	127	127
4.21281e-07	2.84072e-06	tpo signaling pathway	BioCarta	tpopathway	PRKCA; JUN; MAPK3; GRB2; PIK3R1; CSNK2A1	3725; 5578; 5595; 2885; 1457; 5295	25	25
4.45919e-07	2.98612e-06	Signaling by BRAF and RAF fusions	Reactome	R-HSA-6802952	SRC; FN1; VCL; MAPK3; MAPK1; ARRB2; ARRB1; LMNA	7414; 4000; 6714; 5595; 5594; 409; 408; 2335	58	58
4.49473e-07	2.98931e-06	Spry regulation of FGF signaling	Reactome	R-HSA-1295596	SRC; UBA52; RPS27A; GRB2; UBC	7316; 7311; 6714; 6233; 2885	14	14
4.57342e-07	3.02095e-06	Cellular Senescence	Reactome	R-HSA-2559583	H2AFX; TP53; SP1; RPS27A; JUN; UBA52; MAPK3; CDK2; MAPK1; UBC; NFKB1; MDM2; MOV10	3725; 6667; 5594; 4193; 1017; 7316; 7157; 3014; 4790; 4343; 7311; 5595; 6233	189	188
4.70327e-07	3.08573e-06	HTLV-I infection - Homo sapiens (human)	KEGG	path:hsa05166	PCNA; TP53; JUN; SLC25A5; SMAD3; CTNNB1; SMAD2; PRKACA; IKBKG; PIK3R1; APC; NFKB1; MYC; EP300; LCK	4609; 5295; 5566; 3725; 2033; 4790; 292; 324; 8517; 3932; 4087; 7157; 1499; 4088; 5111	255	255
5.03506e-07	3.25936e-06	Mitotic G1-G1/S phases	Reactome	R-HSA-453279	PCNA; SRC; RPS27A; UBA52; CDK1; CDK2; UBC; ABL1; MYC; TOP2A	983; 1017; 6714; 7153; 25; 7311; 5111; 7316; 4609; 6233	104	104
5.03506e-07	3.25936e-06	C-type lectin receptor signaling pathway - Homo sapiens (human)	KEGG	path:hsa04625	SRC; JUN; MAPK3; MAPK1; IKBKG; PIK3R1; IKBKE; NFKB1; MDM2; PAK1	6714; 4193; 3725; 5295; 4790; 8517; 9641; 5058; 5594; 5595	104	104
5.29247e-07	3.4033e-06	Hepatitis C - Homo sapiens (human)	KEGG	path:hsa05160	TP53; TRAF6; MAPK3; EGFR; EIF3E; MAPK1; GRB2; IKBKG; PIK3R1; IKBKE; NFKB1	7189; 3646; 5295; 4790; 8517; 2885; 1956; 9641; 5594; 5595; 7157	131	131
5.33875e-07	3.40447e-06	Bladder cancer - Homo sapiens (human)	KEGG	path:hsa05219	SRC; TP53; EGFR; MAPK3; MAPK1; MYC; MDM2	4609; 6714; 5594; 5595; 4193; 1956; 7157	41	41
5.36441e-07	3.40447e-06	Transcriptional Regulation by TP53	Reactome	R-HSA-3700989	PCNA; YWHAZ; TP53; LRPPRC; SSRP1; RPS27A; JUN; CDK2; CDK1; UBA52; POLR2A; UBC; MOV10; MDM2; EP300; NPM1; YWHAG; CSNK2A1	1457; 4193; 7316; 5430; 983; 2033; 10128; 7311; 3725; 1017; 7157; 6749; 5111; 6233; 7532; 4343; 4869; 7534	373	370
5.40725e-07	3.40937e-06	Cellular senescence - Homo sapiens (human)	KEGG	path:hsa04218	TP53; MAPK3; SLC25A5; SMAD3; CDK1; CDK2; MAPK1; SMAD2; PIK3R1; NFKB1; MYC; MDM2	4609; 4193; 5295; 4790; 292; 983; 5594; 5595; 7157; 4087; 4088; 1017	160	160
5.7097e-07	3.57685e-06	MAPK signaling pathway - Homo sapiens (human)	KEGG	path:hsa04010	TP53; TRAF6; MAPK3; PRKCA; EGFR; HSPA8; JUN; MAPK1; GRB2; ARRB2; IKBKG; ARRB1; NFKB1; MYC; PAK1; PRKACA	409; 4609; 7189; 3725; 4790; 3312; 2885; 408; 1956; 5566; 5058; 8517; 5578; 5594; 5595; 7157	295	295
6.57102e-07	4.09004e-06	Th17 cell differentiation - Homo sapiens (human)	KEGG	path:hsa04659	JUN; SMAD2; SMAD3; HSP90AB1; MAPK3; MAPK1; IKBKG; HSP90AA1; NFKB1; LCK	3725; 4790; 3320; 3326; 8517; 3932; 5594; 5595; 4087; 4088	107	107
6.6763e-07	4.1291e-06	telomeres telomerase cellular aging and immortality	BioCarta	telpathway	PRKCA; POLR2A; MYC; TP53; XRCC6	4609; 2547; 7157; 5578; 5430	15	15
6.90179e-07	4.21487e-06	pdgf signaling pathway	BioCarta	pdgfpathway	PRKCA; JUN; MAPK3; GRB2; PIK3R1; CSNK2A1	3725; 5578; 5595; 2885; 1457; 5295	27	27
6.90179e-07	4.21487e-06	transcription factor creb and its extracellular signals	BioCarta	crebpathway	PRKCA; MAPK3; GRB2; PRKAR1A; PIK3R1; MAPK1	5578; 5595; 2885; 5573; 5594; 5295	27	27
7.06299e-07	4.28635e-06	Autodegradation of the E3 ubiquitin ligase COP1	Reactome	R-HSA-349425	UBA52; RPS27A; TP53; UBC	7316; 7157; 7311; 6233	7	7
7.49842e-07	4.52234e-06	Signaling by EGFR	Reactome	R-HSA-177929	SRC; RPS27A; EGFR; UBA52; GRB2; PIK3R1; UBC	1956; 7316; 7311; 2885; 5295; 6714; 6233	43	43
8.55892e-07	5.13007e-06	DNA Double-Strand Break Repair	Reactome	R-HSA-5693532	UBE2I; PCNA; TP53; RPS27A; H2AFX; UBA52; PRKDC; CDK2; PARP1; UBC; ABL1; XRCC6	1017; 5591; 2547; 7316; 7157; 3014; 7329; 25; 7311; 5111; 142; 6233	169	167
8.69658e-07	5.1806e-06	influence of ras and rho proteins on g1 to s transition	BioCarta	raccycdpathway	MAPK3; CDK2; MAPK1; IKBKG; PIK3R1; PAK1	1017; 5595; 8517; 5594; 5295; 5058	28	28
8.827e-07	5.22623e-06	Signaling by NOTCH3	Reactome	R-HSA-9012852	SNW1; RPS27A; EGFR; UBA52; UBC; EP300; YBX1	22938; 1956; 4904; 7316; 7311; 6233; 2033	44	44
9.59085e-07	5.49256e-06	Fluid shear stress and atherosclerosis - Homo sapiens (human)	KEGG	path:hsa05418	SRC; TP53; JUN; HSP90B1; HSP90AB1; CTNNB1; IKBKG; PIK3R1; HSP90AA1; NFKB1; ACTB	7184; 6714; 60; 3725; 5295; 4790; 3320; 3326; 8517; 7157; 1499	139	139
9.61621e-07	5.49256e-06	cadmium induces dna synthesis and proliferation in macrophages	BioCarta	cdmacpathway	PRKCA; MAPK3; MYC; MAPK1; JUN	5594; 4609; 5595; 3725; 5578	16	16
9.61621e-07	5.49256e-06	Regulation of KIT signaling	Reactome	R-HSA-1433559	PRKCA; SRC; GRB2; FYN; LCK	6714; 2534; 2885; 5578; 3932	16	16
9.61621e-07	5.49256e-06	calcium signaling by hbx of hepatitis b virus	BioCarta	hbxpathway	SRC; GRB2; JUN; CSNK2A1; MAPK3	6714; 5595; 3725; 2885; 1457	16	16
9.61621e-07	5.49256e-06	p75NTR signals via NF-kB	Reactome	R-HSA-193639	NFKB1; UBA52; RPS27A; TRAF6; UBC	7316; 7189; 7311; 6233; 4790	16	16
9.61621e-07	5.49256e-06	MAP3K8 (TPL2)-dependent MAPK1/3 activation	Reactome	R-HSA-5684264	NFKB1; UBA52; RPS27A; IKBKG; UBC	7316; 7311; 6233; 8517; 4790	16	16
1.09121e-06	6.1963e-06	Nucleotide Excision Repair	Reactome	R-HSA-5696398	UBE2I; PCNA; PRPF19; RPS27A; PARP1; UBA52; POLR2A; UBC; ACTB; EP300	5430; 27339; 7316; 60; 7329; 7311; 5111; 2033; 142; 6233	113	113
1.13024e-06	6.38062e-06	Gap junction - Homo sapiens (human)	KEGG	path:hsa04540	SRC; MAPK3; PRKCA; EGFR; TUBB; CDK1; GRB2; PRKACA; MAPK1	6714; 203068; 2885; 1956; 5566; 5578; 983; 5594; 5595	88	88
1.23105e-06	6.90952e-06	Signaling by ROBO receptors	Reactome	R-HSA-376176	NCK1; PRKCA; RPS27A; UBA52; PRKACA; UBC; ABL1; PAK1	5578; 4690; 25; 5566; 7316; 7311; 6233; 5058	66	66
1.34349e-06	7.45445e-06	mcalpain and friends in cell motility	BioCarta	mcalpainpathway	ITGB1; GRB2; EGFR; MAPK3; MAPK1; PRKAR1A	5595; 1956; 5594; 2885; 5573; 3688	30	30
1.34349e-06	7.45445e-06	vegf hypoxia and angiogenesis	BioCarta	vegfpathway	SRC; PRKCA; VHL; GRB2; PIK3R1; HSP90AA1	7428; 5578; 3320; 6714; 2885; 5295	30	30
1.38373e-06	7.63305e-06	Signaling by TGF-beta Receptor Complex	Reactome	R-HSA-170834	SNW1; SP1; RPS27A; PARP1; SMAD2; SMAD3; UBA52; UBC	6667; 22938; 4088; 4087; 7316; 7311; 142; 6233	67	67
1.39926e-06	7.63305e-06	cbl mediated ligand-induced downregulation of egf receptors pathway	BioCarta	cblpathway	PRKCA; SRC; GRB2; EGFR	6714; 1956; 2885; 5578	8	8
1.39926e-06	7.63305e-06	InlA-mediated entry of Listeria monocytogenes into host cells	Reactome	R-HSA-8876493	CTNNB1; UBA52; RPS27A; UBC	7316; 7311; 1499; 6233	8	8
1.44132e-06	7.81856e-06	Regulation of actin cytoskeleton - Homo sapiens (human)	KEGG	path:hsa04810	MYH10; SRC; FN1; VCL; EGFR; MAPK3; MAPK1; ITGB1; PIK3R1; APC; ACTB; PAK1; GSN	4628; 2934; 6714; 60; 3688; 5295; 2335; 324; 1956; 7414; 5058; 5594; 5595	208	208
1.64918e-06	8.89642e-06	VEGFA-VEGFR2 Pathway	Reactome	R-HSA-4420097	SRC; NCK1; PRKCA; FYN; CTNNB1; PRKACA; PIK3R1; HSP90AA1; PAK1	3320; 5578; 2534; 6714; 4690; 5566; 5295; 5058; 1499	92	92
1.67099e-06	8.96428e-06	Breast cancer - Homo sapiens (human)	KEGG	path:hsa05224	TP53; MAPK3; SP1; JUN; CTNNB1; MAPK1; GRB2; PIK3R1; APC; MYC; EGFR	4609; 6667; 3725; 5295; 1499; 324; 2885; 1956; 5594; 5595; 7157	147	147
1.73794e-06	9.2722e-06	Renal cell carcinoma - Homo sapiens (human)	KEGG	path:hsa05211	MAPK3; JUN; VHL; GRB2; PIK3R1; MAPK1; EP300; PAK1	7428; 3725; 2033; 5295; 5058; 2885; 5594; 5595	69	69
1.80717e-06	9.58885e-06	Small cell lung cancer - Homo sapiens (human)	KEGG	path:hsa05222	ITGB1; TP53; TRAF6; FN1; CDK2; IKBKG; PIK3R1; NFKB1; MYC	4609; 7189; 3688; 5295; 4790; 2335; 8517; 7157; 1017	93	93
1.84964e-06	9.76085e-06	nerve growth factor pathway (ngf)	BioCarta	ngfpathway	MAPK3; GRB2; JUN; CSNK2A1; PIK3R1	5295; 5595; 3725; 2885; 1457	18	18
2.16654e-06	1.13714e-05	Glioma - Homo sapiens (human)	KEGG	path:hsa05214	TP53; PRKCA; GRB2; EGFR; MAPK3; MAPK1; PIK3R1; MDM2	5295; 2885; 5578; 1956; 5594; 5595; 4193; 7157	71	71
2.36191e-06	1.23302e-05	PI5P, PP2A and IER3 Regulate PI3K/AKT Signaling	Reactome	R-HSA-6811558	SRC; TRAF6; FYN; EGFR; GRB2; MAPK3; MAPK1; PIK3R1; LCK	2534; 1956; 5594; 6714; 5295; 3932; 2885; 7189; 5595	96	96
2.4319e-06	1.24283e-05	integrin signaling pathway	BioCarta	integrinpathway	ITGB1; SRC; VCL; FYN; GRB2; ZYX	2885; 7791; 6714; 2534; 7414; 3688	33	33
2.4319e-06	1.24283e-05	CD28 co-stimulation	Reactome	R-HSA-389356	SRC; FYN; PAK1; GRB2; PIK3R1; LCK	3932; 6714; 2534; 2885; 5295; 5058	33	33
2.4319e-06	1.24283e-05	bioactive peptide induced signaling pathway	BioCarta	biopeptidespathway	PRKCA; FYN; MAPK3; GRB2; PIK3R1; MAPK1	5578; 5595; 2534; 2885; 5594; 5295	33	33
2.4319e-06	1.24283e-05	phospholipids as signalling intermediaries	BioCarta	edg1pathway	SRC; PRKCA; MAPK3; GRB2; PIK3R1; MAPK1	5578; 6714; 5595; 2885; 5594; 5295	33	33
2.48574e-06	1.24874e-05	Gastrin-CREB signalling pathway via PKC and MAPK	Reactome	R-HSA-881907	PRKCA; MAPK3; MAPK1; EGFR; GRB2	5594; 5595; 2885; 1956; 5578	19	19
2.48574e-06	1.24874e-05	Listeria monocytogenes entry into host cells	Reactome	R-HSA-8876384	CTNNB1; UBA52; GRB2; RPS27A; UBC	7316; 7311; 1499; 2885; 6233	19	19
2.48574e-06	1.24874e-05	Translesion Synthesis by POLH	Reactome	R-HSA-110320	VCP; PCNA; UBA52; RPS27A; UBC	7316; 7415; 7311; 6233; 5111	19	19
2.4949e-06	1.24874e-05	spliceosomal assembly	BioCarta	smpathway	U2AF1; SNRNP70; SNRPA1; U2AF2	6627; 6625; 11338; 7307	9	9
2.52411e-06	1.25688e-05	Herpes simplex infection - Homo sapiens (human)	KEGG	path:hsa05168	TP53; TRAF6; JUN; CDK1; CDK2; HNRNPK; POLR2A; IKBKG; IKBKE; NFKB1; EP300; CSNK2A1	7189; 3190; 3725; 4790; 5430; 8517; 2033; 9641; 1457; 983; 7157; 1017	185	185
2.6703e-06	1.32188e-05	Kaposi,s sarcoma-associated herpesvirus infection - Homo sapiens (human)	KEGG	path:hsa05167	SRC; TP53; JUN; CTNNB1; MAPK3; MAPK1; IKBKG; PIK3R1; IKBKE; NFKB1; MYC; EP300	4609; 6714; 3725; 5295; 4790; 5595; 8517; 9641; 5594; 1499; 2033; 7157	186	186
2.68188e-06	1.32188e-05	Signaling by NOTCH1	Reactome	R-HSA-1980143	SNW1; EP300; UBC; UBA52; ARRB2; ARRB1; MYC; RPS27A	22938; 409; 7316; 7311; 408; 4609; 6233; 2033	74	73
2.75331e-06	1.35024e-05	Oxidative Stress Induced Senescence	Reactome	R-HSA-2559580	TP53; JUN; RPS27A; H2AFX; MAPK3; UBA52; MAPK1; UBC; MOV10; MDM2	3725; 5594; 4193; 7316; 7157; 3014; 4343; 7311; 5595; 6233	126	125
2.77611e-06	1.35458e-05	Cytokine Signaling in Immune system	Reactome	R-HSA-1280215	YWHAZ; DHX9; TRAF6; EIF4A3; JUN; RPS27A; FYN; SMAD3; MAPK3; UBA52; GRB2; PRKACA; IKBKG; PIK3R1; UBC; NFKB1; SMARCA4; LCK; MAPK1	6597; 2885; 5595; 1660; 7316; 2534; 4088; 3932; 7311; 7189; 3725; 4790; 6233; 5594; 5566; 5295; 8517; 9775; 7534	458	458
2.97634e-06	1.44501e-05	Bacterial invasion of epithelial cells - Homo sapiens (human)	KEGG	path:hsa05100	ITGB1; SRC; FN1; VCL; ILK; CTNNB1; PIK3R1; ACTB	3611; 5295; 6714; 60; 7414; 1499; 2335; 3688	74	74
3.05748e-06	1.46971e-05	AGE-RAGE signaling pathway in diabetic complications - Homo sapiens (human)	KEGG	path:hsa04933	FN1; PRKCA; JUN; SMAD2; SMAD3; MAPK3; MAPK1; PIK3R1; NFKB1	3725; 5295; 4790; 2335; 5578; 4088; 5594; 5595; 4087	99	99
3.05748e-06	1.46971e-05	Cellular response to heat stress	Reactome	R-HSA-3371556	VCP; HSPA5; EEF1A1; HSPA8; HSP90AB1; MAPK3; MAPK1; HSP90AA1; EP300	5594; 3309; 3326; 7415; 2033; 3312; 5595; 3320; 1915	99	99
3.17982e-06	1.52099e-05	Osteoclast differentiation - Homo sapiens (human)	KEGG	path:hsa04380	TRAF6; MAPK3; FYN; JUN; MAPK1; GRB2; IKBKG; PIK3R1; NFKB1; LCK	7189; 3725; 5295; 4790; 8517; 3932; 2885; 5594; 5595; 2534	128	127
3.27762e-06	1.55455e-05	Platelet activation, signaling and aggregation	Reactome	R-HSA-76002	YWHAZ; SRC; FN1; HSPA5; PRKCA; VCL; FYN; GRB2; MAPK3; MAPK1; ARRB2; PIK3R1; ARRB1; LCK	7414; 2534; 5594; 5578; 3309; 6714; 5295; 2335; 2885; 3932; 409; 5595; 7534; 408	260	260
3.28201e-06	1.55455e-05	sprouty regulation of tyrosine kinase signals	BioCarta	sprypathway	SRC; GRB2; MAPK1; EGFR; MAPK3	5594; 6714; 5595; 1956; 2885	20	20
3.32544e-06	1.56748e-05	Signaling by VEGF	Reactome	R-HSA-194138	SRC; NCK1; PRKCA; FYN; CTNNB1; PRKACA; PIK3R1; HSP90AA1; PAK1	3320; 5578; 2534; 6714; 4690; 5566; 5295; 5058; 1499	100	100
3.45052e-06	1.61858e-05	RHO GTPase Effectors	Reactome	R-HSA-195258	MYH10; SRC; YWHAZ; NCK1; PKN1; H2AFX; YWHAG; CTNNB1; MAPK3; GRB2; ITGB1; ABL1; MAPK1; ACTB; PAK1	5594; 4628; 2885; 3014; 7534; 6714; 4690; 5058; 60; 7532; 25; 5585; 5595; 1499; 3688	300	299
3.68596e-06	1.71247e-05	Signaling by PTK6	Reactome	R-HSA-8848021	NR3C1; RPS27A; EGFR; SFPQ; CDK2; UBA52; UBC	1017; 1956; 7316; 7311; 2908; 6421; 6233	54	54
3.68596e-06	1.71247e-05	Signaling by Non-Receptor Tyrosine Kinases	Reactome	R-HSA-9006927	NR3C1; RPS27A; EGFR; SFPQ; CDK2; UBA52; UBC	1017; 1956; 7316; 7311; 2908; 6421; 6233	54	54
3.92244e-06	1.81366e-05	Chagas disease (American trypanosomiasis) - Homo sapiens (human)	KEGG	path:hsa05142	TRAF6; JUN; SMAD2; SMAD3; MAPK3; MAPK1; IKBKG; PIK3R1; NFKB1	7189; 3725; 5295; 4790; 8517; 4088; 5594; 5595; 4087	102	102
4.02981e-06	1.85448e-05	Interleukin-1 family signaling	Reactome	R-HSA-446652	DHX9; TRAF6; RPS27A; SMAD3; UBA52; IKBKG; UBC; NFKB1	4790; 7189; 4088; 8517; 1660; 7316; 7311; 6233	77	77
4.11894e-06	1.88655e-05	regulation of splicing through sam68	BioCarta	sam68pathway	SRC; MAPK1; CDK1; MAPK3	6714; 5594; 5595; 983	10	10
4.1809e-06	1.89998e-05	t cell receptor signaling pathway	BioCarta	tcrpathway	PRKCA; JUN; FYN; MAPK3; GRB2; PIK3R1; LCK	3725; 5578; 3932; 5595; 2534; 2885; 5295	55	55
4.2078e-06	1.89998e-05	FoxO signaling pathway - Homo sapiens (human)	KEGG	path:hsa04068	EGFR; SMAD2; SMAD3; MAPK3; CDK2; GRB2; PIK3R1; MAPK1; MDM2; EP300	4193; 5295; 2885; 1956; 2033; 1017; 5594; 5595; 4087; 4088	132	131
4.25397e-06	1.89998e-05	Negative regulation of the PI3K/AKT network	Reactome	R-HSA-199418	SRC; TRAF6; FYN; EGFR; GRB2; MAPK3; MAPK1; PIK3R1; LCK	2534; 1956; 5594; 6714; 5295; 3932; 2885; 7189; 5595	103	103
4.26565e-06	1.89998e-05	igf-1 signaling pathway	BioCarta	igf1pathway	MAPK3; GRB2; JUN; CSNK2A1; PIK3R1	5295; 5595; 3725; 2885; 1457	21	21
4.26565e-06	1.89998e-05	cell cycle: g2/m checkpoint	BioCarta	g2pathway	CDK1; MDM2; EP300; TP53; PRKDC	7157; 2033; 983; 4193; 5591	21	21
4.26565e-06	1.89998e-05	TICAM1, RIP1-mediated IKK complex recruitment	Reactome	R-HSA-168927	UBA52; RPS27A; IKBKG; TRAF6; UBC	7316; 7189; 7311; 6233; 8517	21	21
4.9044e-06	2.17451e-05	RHO GTPases Activate WASPs and WAVEs	Reactome	R-HSA-5663213	NCK1; GRB2; MAPK3; MAPK1; ABL1; ACTB	5595; 5594; 4690; 25; 2885; 60	37	37
5.46646e-06	2.40178e-05	inhibition of cellular proliferation by gleevec	BioCarta	gleevecpathway	MAPK3; MYC; GRB2; JUN; PIK3R1	3725; 5595; 2885; 5295; 4609	22	22
5.46646e-06	2.40178e-05	erk1/erk2 mapk signaling pathway	BioCarta	erkpathway	SRC; MYC; GRB2; MAPK1; MAPK3	6714; 5595; 2885; 5594; 4609	22	22
5.91288e-06	2.58622e-05	Signaling by Hedgehog	Reactome	R-HSA-5358351	RPS27A; ARRB1; VCP; UBA52; PRKACA; PRKAR1A; UBC; ARRB2	409; 5566; 5573; 7415; 7316; 7311; 408; 6233	82	81
6.41158e-06	2.75471e-05	GAB1 signalosome	Reactome	R-HSA-180292	SRC; GRB2; EGFR; PIK3R1	5295; 6714; 1956; 2885	11	11
6.41158e-06	2.75471e-05	The role of GTSE1 in G2/M progression after G2 checkpoint	Reactome	R-HSA-8852276	HSP90AB1; HSP90AA1; TP53; CDK1	7157; 3320; 3326; 983	11	11
6.41158e-06	2.75471e-05	Hh mutants that don,t undergo autocatalytic processing are degraded by ERAD	Reactome	R-HSA-5362768	VCP; UBA52; RPS27A; UBC	7316; 7311; 6233; 7415	11	11
6.41158e-06	2.75471e-05	Hh mutants abrogate ligand secretion	Reactome	R-HSA-5387390	VCP; UBA52; RPS27A; UBC	7316; 7311; 6233; 7415	11	11
6.70879e-06	2.86971e-05	Apoptosis - Homo sapiens (human)	KEGG	path:hsa04210	TP53; JUN; PARP1; MAPK3; MAPK1; IKBKG; PIK3R1; NFKB1; ACTB; LMNA	60; 142; 5295; 4790; 3725; 8517; 4000; 7157; 5594; 5595	138	138
6.74664e-06	2.87324e-05	Degradation of beta-catenin by the destruction complex	Reactome	R-HSA-195253	RPS27A; CTNNB1; UBA52; UBC; APC; MYC	1499; 7316; 7311; 324; 4609; 6233	39	39
6.91687e-06	2.93287e-05	how progesterone initiates the oocyte maturation	BioCarta	mprpathway	CDK1; MAPK1; MAPK3; PRKAR1A; SRC	983; 5594; 6714; 5595; 5573	23	23
7.1042e-06	2.99921e-05	C-type lectin receptors (CLRs)	Reactome	R-HSA-5621481	SRC; TRAF6; FYN; PRKACA; IKBKG; NFKB1; EP300; PAK1	4790; 7189; 6714; 5566; 8517; 2033; 2534; 5058	83	83
7.56386e-06	3.17944e-05	Interleukin-1 signaling	Reactome	R-HSA-9020702	DHX9; TRAF6; RPS27A; UBA52; IKBKG; UBC; NFKB1	4790; 7189; 8517; 1660; 7316; 7311; 6233	60	60
7.8583e-06	3.28717e-05	Transcriptional regulation by the AP-2 (TFAP2) family of transcription factors	Reactome	R-HSA-8864260	UBE2I; EGFR; HSPD1; MYC; EP300; NPM1	7329; 1956; 4609; 3329; 4869; 2033	40	40
7.88786e-06	3.28717e-05	Senescence-Associated Secretory Phenotype (SASP)	Reactome	R-HSA-2559582	JUN; RPS27A; H2AFX; UBA52; MAPK3; CDK2; MAPK1; UBC; NFKB1	3725; 1017; 5594; 3014; 4790; 7311; 5595; 7316; 6233	112	111
8.45824e-06	3.50981e-05	Signaling by MET	Reactome	R-HSA-6806834	ITGB1; SRC; RPS27A; UBA52; GRB2; PIK3R1; UBC	6714; 7316; 7311; 2885; 5295; 6233; 3688	61	61
8.79847e-06	3.63545e-05	Immune System	Reactome	R-HSA-168256	HSPA5; SRC; JUN; RPS27A; HSP90B1; SMAD3; CTNNB1; VHL; IKBKG; IKBKE; ABL1; SMARCA4; XRCC6; YWHAZ; FYN; HSP90AB1; MAPK3; MAPK1; PIK3R1; EEF1A1; NFKB1; GSN; ITGB1; DHX9; HSPA8; DDX3X; TRAF6; VCL; VCP; EP300; NCK1; PRKDC; TUBB; LCK; UBA52; GRB2; PRKACA; UBC; HSP90AA1; ACTB; PAK1; EIF4A3; ILF2	1660; 2534; 4790; 2934; 6233; 3688; 2547; 3309; 8517; 6714; 2885; 5595; 7316; 3326; 4088; 4690; 7184; 5594; 7534; 3608; 1654; 203068; 6597; 2033; 5058; 3932; 7311; 7189; 3320; 3725; 9641; 25; 1915; 5566; 9775; 3312; 1499; 7415; 60; 5591; 5295; 7428; 7414	1840	1827
8.88841e-06	3.65705e-05	Metabolism	Reactome	R-HSA-1430728	RPS13; RPS10; RPS16; RPL9; RPL6; RPL7; RPL27A; RPL5; LRPPRC; GAPDH; RPS15A; RPS7; RPS6; RPS3; RPS9; RPS8; RPL7A; RPL24; RPL26; RPL21; RPL23; HSP90AB1; PIK3R1; RPS3A; RPL4; RPS27A; PRKCA; SP1; RPLP1; SLC25A5; RPL14; RPL11; RPL12; RPL13; RPS4X; RPL18; CSNK2A1; UBE2I; LRP1; RPSA; RPL31; UBA52; PRKACA; HSP90AA1; PRKAR1A	6133; 6144; 6130; 6201; 6191; 6210; 6157; 6154; 6125; 3921; 6233; 292; 2597; 6135; 6124; 6203; 4035; 3326; 6137; 6202; 6217; 1457; 6136; 6129; 6204; 7311; 6194; 3320; 7329; 5566; 9349; 9045; 6128; 6207; 5578; 6189; 6176; 6667; 10128; 6141; 6152; 5573; 6188; 6160; 5295	1966	1954
9.05694e-06	3.71067e-05	Axon guidance - Homo sapiens (human)	KEGG	path:hsa04360	ITGB1; SRC; NCK1; PRKCA; FYN; ILK; MAPK3; MAPK1; PIK3R1; ABL1; PAK1	25; 3611; 6714; 4690; 3688; 5295; 2534; 5058; 5578; 5594; 5595	175	175
9.52671e-06	3.87047e-05	CD28 dependent Vav1 pathway	Reactome	R-HSA-389359	GRB2; FYN; LCK; PAK1	2534; 2885; 3932; 5058	12	12
9.52671e-06	3.87047e-05	Josephin domain DUBs	Reactome	R-HSA-5689877	VCP; UBA52; RPS27A; UBC	7316; 7311; 6233; 7415	12	12
1.01028e-05	4.08744e-05	Regulation of PLK1 Activity at G2/M Transition	Reactome	R-HSA-2565942	RPS27A; TUBB; CDK1; UBA52; PRKACA; UBC; HSP90AA1; YWHAG	983; 7532; 5566; 7311; 3320; 7316; 6233; 203068	87	87
1.04056e-05	4.19247e-05	Wnt signaling pathway - Homo sapiens (human)	KEGG	path:hsa04310	TP53; PRKCA; JUN; SMAD3; CTNNB1; PRKACA; APC; MYC; EP300; CSNK2A1	4609; 3725; 324; 7157; 1457; 5566; 5578; 1499; 2033; 4088	146	145
1.07097e-05	4.21016e-05	EGFR downregulation	Reactome	R-HSA-182971	RPS27A; UBA52; GRB2; EGFR; UBC	1956; 2885; 7316; 7311; 6233	25	25
1.07097e-05	4.21016e-05	NOTCH3 Activation and Transmission of Signal to the Nucleus	Reactome	R-HSA-9013507	YBX1; UBA52; RPS27A; EGFR; UBC	1956; 4904; 7316; 7311; 6233	25	25
1.07097e-05	4.21016e-05	regulation of eif-4e and p70s6 kinase	BioCarta	eif4pathway	PRKCA; MAPK3; MAPK1; PIK3R1; PABPC1	5578; 5595; 26986; 5594; 5295	25	25
1.07097e-05	4.21016e-05	Regulation of PTEN stability and activity	Reactome	R-HSA-8948751	UBA52; TRIM27; RPS27A; CSNK2A1; UBC	5987; 7311; 1457; 7316; 6233	25	25
1.07097e-05	4.21016e-05	cell cycle: g1/s check point	BioCarta	g1pathway	ABL1; CDK1; CDK2; TP53; SMAD3	7157; 1017; 983; 4088; 25	25	25
1.07097e-05	4.21016e-05	IKK complex recruitment mediated by RIP1	Reactome	R-HSA-937041	UBA52; RPS27A; IKBKG; TRAF6; UBC	7189; 8517; 7316; 7311; 6233	25	25
1.13349e-05	4.438e-05	Infectious disease	Reactome	R-HSA-5663205	SSRP1; RPS27A; FYN; SLC25A5; CTNNB1; UBA52; GRB2; POLR2A; UBC; HSP90AA1; NPM1; LCK; XRCC6	292; 2534; 2547; 2885; 5430; 6749; 3932; 4869; 7311; 3320; 7316; 6233; 1499	253	251
1.21127e-05	4.72348e-05	Signaling by SCF-KIT	Reactome	R-HSA-1433557	SRC; PRKCA; FYN; GRB2; PIK3R1; LCK	5578; 3932; 2534; 6714; 2885; 5295	43	43
1.24622e-05	4.84033e-05	ESR-mediated signaling	Reactome	R-HSA-8939211	MOV10; H2AFX; JUN; HSP90AB1; DDX5; POLR2A; SP1; HSP90AA1; MYC; EP300	3725; 5430; 6667; 2033; 3326; 3014; 4343; 1655; 4609; 3320	150	148
1.31305e-05	5.07956e-05	Downregulation of TGF-beta receptor signaling	Reactome	R-HSA-2173788	UBA52; UBC; RPS27A; SMAD2; SMAD3	4088; 4087; 7316; 7311; 6233	26	26
1.36311e-05	5.21095e-05	Constitutive Signaling by EGFRvIII	Reactome	R-HSA-5637810	HSP90AA1; GRB2; EGFR; PIK3R1	1956; 5295; 2885; 3320	13	13
1.36311e-05	5.21095e-05	Signaling by EGFRvIII in Cancer	Reactome	R-HSA-5637812	HSP90AA1; GRB2; EGFR; PIK3R1	1956; 5295; 2885; 3320	13	13
1.36311e-05	5.21095e-05	p53 signaling pathway	BioCarta	p53pathway	PCNA; MDM2; TP53; CDK2	7157; 4193; 1017; 5111	13	13
1.38859e-05	5.27437e-05	Signaling by ERBB4	Reactome	R-HSA-1236394	RPS27A; EGFR; UBA52; GRB2; PIK3R1; UBC	1956; 2885; 7316; 7311; 5295; 6233	44	44
1.39056e-05	5.27437e-05	Neurotrophin signaling pathway - Homo sapiens (human)	KEGG	path:hsa04722	TP53; TRAF6; MAPK3; JUN; MAPK1; GRB2; PIK3R1; ABL1; NFKB1	7189; 25; 3725; 5295; 4790; 2885; 7157; 5594; 5595	119	119
1.40202e-05	5.29713e-05	Fc epsilon receptor (FCERI) signaling	Reactome	R-HSA-2454202	TRAF6; FYN; JUN; GRB2; MAPK3; MAPK1; IKBKG; PIK3R1; NFKB1; PAK1	2534; 3725; 5594; 2885; 4790; 5295; 5058; 8517; 7189; 5595	150	150
1.43534e-05	5.38113e-05	Acute myeloid leukemia - Homo sapiens (human)	KEGG	path:hsa05221	GRB2; MAPK3; MAPK1; IKBKG; PIK3R1; NFKB1; MYC	4609; 2885; 5295; 8517; 5594; 5595; 4790	66	66
1.43534e-05	5.38113e-05	Non-small cell lung cancer - Homo sapiens (human)	KEGG	path:hsa05223	TP53; PRKCA; EGFR; MAPK3; GRB2; PIK3R1; MAPK1	5595; 1956; 5295; 5578; 2885; 5594; 7157	66	66
1.45632e-05	5.43879e-05	M Phase	Reactome	R-HSA-68886	MAPK3; PRKCA; RPS27A; H2AFX; GOLGA2; TUBB; CDK1; UBA52; MAPK1; PRKACA; UBC; HSP90AA1; LMNA; YWHAG; CSNK2A1	5594; 983; 1457; 5578; 3014; 4000; 5566; 7532; 7311; 5595; 3320; 7316; 6233; 2801; 203068	338	337
1.48793e-05	5.51755e-05	SUMO E3 ligases SUMOylate target proteins	Reactome	R-HSA-3108232	UBE2I; DDX17; TP53; PARP1; HNRNPK; PCNA; MDM2; HNRNPC; TOP2A	3183; 10521; 7157; 7153; 7329; 4193; 5111; 3190; 142	120	120
1.48877e-05	5.51755e-05	Ub-specific processing proteases	Reactome	R-HSA-5689880	ARRB1; TP53; TRAF6; RPS27A; SMAD2; SMAD3; UBA52; ARRB2; IKBKG; UBC; MDM2; MYC	6233; 4193; 408; 7316; 7157; 4088; 8517; 7311; 7189; 409; 4087; 4609	220	220
1.52914e-05	5.63279e-05	GnRH signaling pathway - Homo sapiens (human)	KEGG	path:hsa04912	SRC; PRKCA; JUN; EGFR; MAPK3; GRB2; PRKACA; MAPK1	6714; 3725; 2885; 1956; 5566; 5578; 5594; 5595	92	92
1.53147e-05	5.63279e-05	Chemokine signaling pathway - Homo sapiens (human)	KEGG	path:hsa04062	SRC; MAPK3; MAPK1; GRB2; ARRB2; IKBKG; PIK3R1; ARRB1; NFKB1; PAK1; PRKACA	6714; 5295; 4790; 2885; 408; 409; 8517; 5566; 5058; 5594; 5595	185	185
1.59578e-05	5.84719e-05	FGFR2 alternative splicing	Reactome	R-HSA-6803529	HNRNPH1; HNRNPA1; POLR2A; HNRNPM; HNRNPF	5430; 4670; 3187; 3178; 3185	27	27
1.62016e-05	5.91419e-05	MicroRNAs in cancer - Homo sapiens (human)	KEGG	path:hsa05206	UBE2I; TP53; PRKCA; GRB2; EGFR; VIM; MAPK1; HNRNPK; NFKB1; ABL1; APC; MYC; EP300; MDM2	4609; 7157; 25; 324; 3190; 5594; 4193; 7329; 4790; 7431; 5578; 2885; 1956; 2033	299	299
1.65605e-05	6.02256e-05	Regulation of TP53 Activity through Phosphorylation	Reactome	R-HSA-6804756	TP53; SSRP1; RPS27A; UBA52; CDK2; UBC; MDM2; CSNK2A1	1017; 1457; 4193; 7157; 7311; 6749; 7316; 6233	93	93
1.75091e-05	6.34379e-05	Gap-filling DNA repair synthesis and ligation in TC-NER	Reactome	R-HSA-6782210	PCNA; PRPF19; RPS27A; UBA52; POLR2A; UBC; EP300	5430; 5111; 7316; 7311; 6233; 2033; 27339	68	68
1.78071e-05	6.42775e-05	TCF dependent signaling in response to WNT	Reactome	R-HSA-201681	YWHAZ; RPS27A; H2AFX; CTNNB1; UBA52; UBC; APC; MYC; EP300; SMARCA4; CSNK2A1	6597; 3014; 7534; 2033; 7311; 1457; 4609; 1499; 7316; 324; 6233	190	188
1.89038e-05	6.79835e-05	Golgi Cisternae Pericentriolar Stack Reorganization	Reactome	R-HSA-162658	MAPK3; GOLGA2; MAPK1; CDK1	5594; 2801; 5595; 983	14	14
1.92897e-05	6.91156e-05	Dual incision in TC-NER	Reactome	R-HSA-6782135	PCNA; PRPF19; RPS27A; UBA52; POLR2A; UBC; EP300	5430; 5111; 7316; 7311; 6233; 2033; 27339	69	69
2.04987e-05	7.31772e-05	NOTCH1 Intracellular Domain Regulates Transcription	Reactome	R-HSA-2122947	SNW1; RPS27A; UBA52; UBC; MYC; EP300	22938; 7316; 7311; 4609; 6233; 2033	47	47
2.09115e-05	7.43775e-05	Signaling by TGF-beta family members	Reactome	R-HSA-9006936	SNW1; SP1; RPS27A; PARP1; SMAD2; SMAD3; UBA52; UBC	6667; 4088; 7311; 22938; 4087; 7316; 142; 6233	96	96
2.12172e-05	7.51896e-05	B cell receptor signaling pathway - Homo sapiens (human)	KEGG	path:hsa04662	MAPK3; JUN; MAPK1; GRB2; IKBKG; PIK3R1; NFKB1	3725; 5295; 8517; 4790; 2885; 5594; 5595	71	70
2.20289e-05	7.77822e-05	SUMOylation	Reactome	R-HSA-2990846	UBE2I; DDX17; TP53; PARP1; HNRNPK; PCNA; MDM2; HNRNPC; TOP2A	3183; 10521; 7157; 7153; 7329; 4193; 5111; 3190; 142	126	126
2.30196e-05	8.01148e-05	Downregulation of ERBB2 signaling	Reactome	R-HSA-8863795	HSP90AA1; UBA52; RPS27A; EGFR; UBC	3320; 1956; 7316; 7311; 6233	29	29
2.30196e-05	8.01148e-05	the information processing pathway at the ifn beta enhancer	BioCarta	pcafpathway	POLR2A; NR3C1; SMARCA4; JUN; ACTB	3725; 2908; 5430; 6597; 60	29	29
2.30196e-05	8.01148e-05	fc epsilon receptor i signaling in mast cells	BioCarta	fcer1pathway	MAPK3; GRB2; JUN; PIK3R1; MAPK1	3725; 5595; 2885; 5594; 5295	29	29
2.30196e-05	8.01148e-05	Cyclin E associated events during G1/S transition	Reactome	R-HSA-69202	UBA52; MYC; RPS27A; CDK2; UBC	7316; 7311; 1017; 4609; 6233	29	29
2.32875e-05	8.07577e-05	Fcgamma receptor (FCGR) dependent phagocytosis	Reactome	R-HSA-2029480	NCK1; GRB2; HSP90AB1; MAPK3; MAPK1; PIK3R1; ABL1; HSP90AA1; ACTB; PAK1	3320; 5594; 3326; 4690; 5295; 60; 5058; 25; 2885; 5595	159	159
2.55351e-05	8.52559e-05	il-7 signal transduction	BioCarta	il7pathway	EP300; FYN; LCK; PIK3R1	2534; 5295; 2033; 3932	15	15
2.55351e-05	8.52559e-05	pten dependent cell cycle arrest and apoptosis	BioCarta	ptenpathway	ITGB1; GRB2; ILK; PIK3R1	3611; 2885; 3688; 5295	15	15
2.55351e-05	8.52559e-05	Signaling by EGFR in Cancer	Reactome	R-HSA-1643713	HSP90AA1; GRB2; EGFR; PIK3R1	5295; 2885; 3320; 1956	15	15
2.55351e-05	8.52559e-05	Constitutive Signaling by Ligand-Responsive EGFR Cancer Variants	Reactome	R-HSA-1236382	HSP90AA1; GRB2; EGFR; PIK3R1	5295; 3320; 2885; 1956	15	15
2.55351e-05	8.52559e-05	Signaling by Ligand-Responsive EGFR Variants in Cancer	Reactome	R-HSA-5637815	HSP90AA1; GRB2; EGFR; PIK3R1	5295; 3320; 2885; 1956	15	15
2.55351e-05	8.52559e-05	repression of pain sensation by the transcriptional regulator dream	BioCarta	dreampathway	MAPK3; JUN; PRKAR1A; POLR2A	5595; 3725; 5573; 5430	15	15
2.55351e-05	8.52559e-05	InlB-mediated entry of Listeria monocytogenes into host cell	Reactome	R-HSA-8875360	UBA52; GRB2; RPS27A; UBC	7316; 7311; 2885; 6233	15	15
2.55351e-05	8.52559e-05	GLI3 is processed to GLI3R by the proteasome	Reactome	R-HSA-5610785	UBA52; RPS27A; PRKACA; UBC	7316; 7311; 6233; 5566	15	15
2.55351e-05	8.52559e-05	Degradation of GLI2 by the proteasome	Reactome	R-HSA-5610783	UBA52; RPS27A; PRKACA; UBC	7316; 7311; 6233; 5566	15	15
2.55351e-05	8.52559e-05	Degradation of GLI1 by the proteasome	Reactome	R-HSA-5610780	UBA52; RPS27A; PRKACA; UBC	7316; 7311; 6233; 5566	16	15
2.55504e-05	8.52559e-05	TCR signaling	Reactome	R-HSA-202403	NCK1; TRAF6; PAK1; IKBKG; PIK3R1; NFKB1; LCK	3932; 7189; 4690; 8517; 4790; 5295; 5058	72	72
2.59435e-05	8.61854e-05	Regulation of TP53 Activity	Reactome	R-HSA-5633007	TP53; SSRP1; RPS27A; UBA52; CDK1; CDK2; UBC; MDM2; EP300; CSNK2A1	983; 1457; 4193; 1017; 7157; 2033; 7311; 6749; 7316; 6233	161	161
2.6184e-05	8.61854e-05	Cargo recognition for clathrin-mediated endocytosis	Reactome	R-HSA-8856825	RPS27A; UBC; EGFR; UBA52; GRB2; ARRB2; ARRB1; DAB2	1956; 2885; 408; 1601; 7311; 409; 7316; 6233	99	99
2.6184e-05	8.61854e-05	Progesterone-mediated oocyte maturation - Homo sapiens (human)	KEGG	path:hsa04914	MAPK3; HSP90AB1; CDK1; CDK2; MAPK1; PRKACA; PIK3R1; HSP90AA1	5295; 3320; 3326; 5566; 983; 5594; 5595; 1017	99	99
2.6184e-05	8.61854e-05	Choline metabolism in cancer - Homo sapiens (human)	KEGG	path:hsa05231	PRKCA; SP1; EGFR; JUN; MAPK3; GRB2; PIK3R1; MAPK1	6667; 3725; 5295; 5578; 2885; 1956; 5594; 5595	99	99
2.73548e-05	8.94328e-05	Deactivation of the beta-catenin transactivating complex	Reactome	R-HSA-3769402	CTNNB1; YWHAZ; UBA52; RPS27A; UBC	1499; 7316; 7534; 7311; 6233	30	30
2.73548e-05	8.94328e-05	Mitophagy	Reactome	R-HSA-5205647	SRC; UBA52; RPS27A; CSNK2A1; UBC	6714; 1457; 7316; 7311; 6233	30	30
3.09163e-05	0.000100737	Signaling by WNT	Reactome	R-HSA-195721	YWHAZ; PRKCA; RPS27A; H2AFX; CTNNB1; UBA52; ARRB2; UBC; APC; MYC; EP300; SMARCA4; CSNK2A1	409; 6597; 7316; 5578; 3014; 2033; 1457; 4609; 6233; 7311; 1499; 324; 7534	278	276
3.22982e-05	0.000104888	Activated NOTCH1 Transmits Signal to the Nucleus	Reactome	R-HSA-2122948	RPS27A; UBA52; ARRB1; ARRB2; UBC	409; 7316; 7311; 408; 6233	32	31
3.25278e-05	0.000105282	L1CAM interactions	Reactome	R-HSA-373760	ITGB1; SRC; HSPA8; EGFR; MAPK3; MAPK1; PAK1; CSNK2A1	1956; 1457; 5594; 3312; 6714; 5058; 5595; 3688	103	102
3.30359e-05	0.000106325	TP53 Regulates Transcription of Cell Cycle Genes	Reactome	R-HSA-6791312	PCNA; TP53; CDK1; CDK2; EP300; NPM1	7157; 983; 5111; 1017; 2033; 4869	51	51
3.37262e-05	0.000106325	chromatin remodeling by hswi/snf atp-dependent complexes	BioCarta	hswisnfpathway	POLR2A; ACTB; SMARCA4; NR3C1	60; 6597; 2908; 5430	16	16
3.37262e-05	0.000106325	Sema3A PAK dependent Axon repulsion	Reactome	R-HSA-399954	HSP90AB1; HSP90AA1; FYN; PAK1	3320; 3326; 5058; 2534	16	16
3.37262e-05	0.000106325	hypoxia-inducible factor in the cardivascular system	BioCarta	hifpathway	HSP90AA1; EP300; JUN; VHL	3725; 3320; 7428; 2033	16	16
3.37262e-05	0.000106325	human cytomegalovirus and map kinase pathways	BioCarta	hcmvpathway	MAPK3; MAPK1; PIK3R1; SP1	5594; 5595; 6667; 5295	16	16
3.37262e-05	0.000106325	NRIF signals cell death from the nucleus	Reactome	R-HSA-205043	UBA52; RPS27A; TRAF6; UBC	7316; 7189; 7311; 6233	16	16
3.37262e-05	0.000106325	Translesion synthesis by REV1	Reactome	R-HSA-110312	PCNA; UBA52; RPS27A; UBC	7316; 7311; 6233; 5111	16	16
3.37262e-05	0.000106325	Defective CFTR causes cystic fibrosis	Reactome	R-HSA-5678895	VCP; UBA52; RPS27A; UBC	7316; 7415; 7311; 6233	16	16
3.38768e-05	0.000106454	Measles - Homo sapiens (human)	KEGG	path:hsa05162	TP53; TRAF6; HSPA8; FYN; CDK2; PIK3R1; IKBKE; NFKB1; CSNK2A1	7189; 5295; 4790; 3312; 9641; 1457; 1017; 2534; 7157	134	133
3.6415e-05	0.000113694	G1/S Transition	Reactome	R-HSA-69206	PCNA; RPS27A; UBA52; CDK1; CDK2; UBC; MYC	1017; 983; 7311; 5111; 7316; 4609; 6233	76	76
3.6415e-05	0.000113694	Recruitment and ATM-mediated phosphorylation of repair and signaling proteins at DNA double strand breaks	Reactome	R-HSA-5693565	UBE2I; TP53; RPS27A; H2AFX; UBA52; UBC; ABL1	7157; 7329; 3014; 25; 7316; 7311; 6233	77	76
3.74338e-05	0.000116501	Toll-like receptor signaling pathway - Homo sapiens (human)	KEGG	path:hsa04620	TRAF6; JUN; MAPK3; MAPK1; IKBKG; PIK3R1; IKBKE; NFKB1	7189; 3725; 5295; 4790; 8517; 9641; 5594; 5595	104	104
3.79071e-05	0.00011685	bcr signaling pathway	BioCarta	bcrpathway	PRKCA; MAPK3; GRB2; JUN; CSNK2A1	3725; 5578; 5595; 2885; 1457	32	32
3.79071e-05	0.00011685	TGF-beta receptor signaling activates SMADs	Reactome	R-HSA-2173789	UBA52; UBC; RPS27A; SMAD2; SMAD3	4088; 4087; 7316; 7311; 6233	32	32
3.79071e-05	0.00011685	Thrombin signalling through proteinase activated receptors (PARs)	Reactome	R-HSA-456926	ARRB1; SRC; MAPK1; ARRB2; MAPK3	6714; 5595; 409; 5594; 408	32	32
3.96535e-05	0.000121847	DNA Double Strand Break Response	Reactome	R-HSA-5693606	UBE2I; TP53; RPS27A; H2AFX; UBA52; UBC; ABL1	7157; 7329; 3014; 25; 7316; 7311; 6233	78	77
4.36885e-05	0.000132567	Translesion synthesis by POLK	Reactome	R-HSA-5655862	PCNA; UBA52; RPS27A; UBC	7316; 7311; 6233; 5111	17	17
4.36885e-05	0.000132567	Translesion synthesis by POLI	Reactome	R-HSA-5656121	PCNA; UBA52; RPS27A; UBC	7316; 7311; 6233; 5111	17	17
4.36885e-05	0.000132567	ABC transporter disorders	Reactome	R-HSA-5619084	VCP; UBA52; RPS27A; UBC	7316; 7415; 7311; 6233	17	17
4.36885e-05	0.000132567	Disorders of transmembrane transporters	Reactome	R-HSA-5619115	VCP; UBA52; RPS27A; UBC	7316; 7415; 7311; 6233	17	17
4.53191e-05	0.000136953	Clathrin-mediated endocytosis	Reactome	R-HSA-8856828	ARRB1; RPS27A; HSPA8; EGFR; UBA52; GRB2; ARRB2; UBC; DAB2	1956; 2885; 3312; 1601; 7311; 409; 7316; 408; 6233	138	138
4.59801e-05	0.000136953	Constitutive Signaling by NOTCH1 PEST Domain Mutants	Reactome	R-HSA-2644606	SNW1; RPS27A; UBA52; UBC; MYC; EP300	22938; 6233; 7316; 7311; 4609; 2033	54	54
4.59801e-05	0.000136953	Signaling by NOTCH1 PEST Domain Mutants in Cancer	Reactome	R-HSA-2644602	SNW1; RPS27A; UBA52; UBC; MYC; EP300	22938; 6233; 7316; 7311; 4609; 2033	54	54
4.59801e-05	0.000136953	Constitutive Signaling by NOTCH1 HD+PEST Domain Mutants	Reactome	R-HSA-2894862	SNW1; RPS27A; UBA52; UBC; MYC; EP300	22938; 6233; 7316; 7311; 4609; 2033	54	54
4.59801e-05	0.000136953	Signaling by NOTCH1 HD+PEST Domain Mutants in Cancer	Reactome	R-HSA-2894858	SNW1; RPS27A; UBA52; UBC; MYC; EP300	22938; 6233; 7316; 7311; 4609; 2033	54	54
4.59801e-05	0.000136953	Signaling by NOTCH1 in Cancer	Reactome	R-HSA-2644603	SNW1; RPS27A; UBA52; UBC; MYC; EP300	22938; 7316; 7311; 4609; 6233; 2033	54	54
4.79613e-05	0.000141642	Homology Directed Repair	Reactome	R-HSA-5693538	UBE2I; PCNA; RPS27A; H2AFX; UBA52; PARP1; CDK2; UBC; ABL1	1017; 7316; 3014; 7329; 25; 7311; 5111; 142; 6233	141	139
4.79613e-05	0.000141642	Signaling pathways regulating pluripotency of stem cells - Homo sapiens (human)	KEGG	path:hsa04550	MAPK3; SMAD2; SMAD3; CTNNB1; MAPK1; GRB2; PIK3R1; APC; MYC	4609; 5295; 1499; 324; 2885; 5594; 5595; 4087; 4088	139	139
4.79921e-05	0.000141642	Influenza A - Homo sapiens (human)	KEGG	path:hsa05164	PRKCA; HSPA8; JUN; MAPK3; MAPK1; PIK3R1; IKBKE; NFKB1; ACTB; EP300	60; 3725; 5295; 4790; 3312; 9641; 5578; 5594; 5595; 2033	173	173
5.36376e-05	0.000157824	Regulation of actin dynamics for phagocytic cup formation	Reactome	R-HSA-2029482	NCK1; GRB2; HSP90AB1; MAPK3; MAPK1; ABL1; HSP90AA1; ACTB; PAK1	3320; 5594; 3326; 4690; 60; 5058; 25; 2885; 5595	141	141
5.50647e-05	0.000161534	Transcription-Coupled Nucleotide Excision Repair (TC-NER)	Reactome	R-HSA-6781827	PCNA; PRPF19; RPS27A; UBA52; POLR2A; UBC; EP300	5430; 5111; 7316; 7311; 6233; 2033; 27339	81	81
5.56424e-05	0.000161763	TP53 Regulates Transcription of Genes Involved in G2 Cell Cycle Arrest	Reactome	R-HSA-6804114	PCNA; CDK1; EP300; TP53	983; 7157; 2033; 5111	18	18
5.56424e-05	0.000161763	atm signaling pathway	BioCarta	atmpathway	ABL1; JUN; MDM2; TP53	7157; 4193; 3725; 25	18	18
5.56424e-05	0.000161763	SCF(Skp2)-mediated degradation of p27/p21	Reactome	R-HSA-187577	UBA52; RPS27A; CDK2; UBC	7316; 7311; 6233; 1017	18	18
5.66626e-05	0.000164237	DDX58/IFIH1-mediated induction of interferon-alpha/beta	Reactome	R-HSA-168928	DHX9; TRAF6; IKBKG; IKBKE; NFKB1; EP300	4790; 9641; 7189; 8517; 1660; 2033	56	56
5.89741e-05	0.00016942	Ubiquitin-dependent degradation of Cyclin D1	Reactome	R-HSA-69229	UBA52; RPS27A; UBC	7316; 7311; 6233	7	7
5.89741e-05	0.00016942	Ubiquitin-dependent degradation of Cyclin D	Reactome	R-HSA-75815	UBA52; RPS27A; UBC	7316; 7311; 6233	7	7
5.89741e-05	0.00016942	Vpu mediated degradation of CD4	Reactome	R-HSA-180534	UBA52; RPS27A; UBC	7316; 7311; 6233	7	7
5.93446e-05	0.000169981	Prion diseases - Homo sapiens (human)	KEGG	path:hsa05020	FYN; MAPK3; MAPK1; PRKACA; HSPA5	5594; 5595; 5566; 2534; 3309	35	35
6.27008e-05	0.000178541	mapkinase signaling pathway	BioCarta	mapkpathway	SP1; JUN; MAPK3; MAPK1; MYC; PAK1	3725; 5595; 6667; 5594; 4609; 5058	57	57
6.27008e-05	0.000178541	Formation of TC-NER Pre-Incision Complex	Reactome	R-HSA-6781823	PRPF19; RPS27A; UBA52; POLR2A; UBC; EP300	5430; 7316; 7311; 6233; 2033; 27339	57	57
6.82469e-05	0.000193765	Regulation of APC/C activators between G1/S and early anaphase	Reactome	R-HSA-176408	CDK1; CDK2; RPS27A; UBA52; UBC	1017; 983; 7316; 7311; 6233	36	36
6.95849e-05	0.000195933	TGF-beta signaling pathway - Homo sapiens (human)	KEGG	path:hsa04350	SP1; SMAD2; SMAD3; MAPK3; MAPK1; MYC; EP300	4609; 6667; 5594; 5595; 2033; 4087; 4088	84	84
6.95849e-05	0.000195933	Global Genome Nucleotide Excision Repair (GG-NER)	Reactome	R-HSA-5696399	UBE2I; PCNA; RPS27A; PARP1; UBA52; UBC; ACTB	7329; 5111; 7316; 7311; 142; 6233; 60	84	84
6.98175e-05	0.000195933	HSP90 chaperone cycle for steroid hormone receptors (SHR)	Reactome	R-HSA-3371497	HSP90AB1; HSP90AA1; NR3C1; HSPA8	3320; 3326; 3312; 2908	19	19
6.98175e-05	0.000195933	CD209 (DC-SIGN) signaling	Reactome	R-HSA-5621575	NFKB1; EP300; PRKACA; PAK1	5566; 2033; 4790; 5058	19	19
7.63167e-05	0.000213555	E3 ubiquitin ligases ubiquitinate target proteins	Reactome	R-HSA-8866654	PCNA; RPS27A; PRKDC; VCP; UBA52; UBC	5591; 7415; 5111; 7316; 7311; 6233	59	59
7.81442e-05	0.00021804	Thyroid cancer - Homo sapiens (human)	KEGG	path:hsa05216	CTNNB1; MAPK3; MYC; MAPK1; TP53	4609; 1499; 5594; 5595; 7157	37	37
8.08979e-05	0.000225077	Salmonella infection - Homo sapiens (human)	KEGG	path:hsa05132	MYH10; PKN1; JUN; MAPK3; MAPK1; NFKB1; ACTB	4628; 60; 3725; 4790; 5585; 5594; 5595	86	86
8.64514e-05	0.000238478	egf signaling pathway	BioCarta	egfpathway	PRKCA; GRB2; EGFR; PIK3R1	5578; 5295; 2885; 1956	20	20
8.64514e-05	0.000238478	tgf beta signaling pathway	BioCarta	tgfbpathway	MAPK3; EP300; SMAD2; SMAD3	5595; 4088; 2033; 4087	20	20
8.64514e-05	0.000238478	Hedgehog ligand biogenesis	Reactome	R-HSA-5358346	VCP; UBA52; RPS27A; UBC	7316; 6233; 7415; 7311	20	20
8.91106e-05	0.000243736	Apoptotic cleavage of cellular proteins	Reactome	R-HSA-111465	CTNNB1; APC; LMNA; GSN; VIM	4000; 1499; 7431; 2934; 324	38	38
8.91106e-05	0.000243736	Hedgehog ,on, state	Reactome	R-HSA-5632684	ARRB1; UBA52; RPS27A; ARRB2; UBC	6233; 409; 7316; 7311; 408	39	38
8.91106e-05	0.000243736	DNA Damage Recognition in GG-NER	Reactome	R-HSA-5696394	UBA52; RPS27A; PARP1; ACTB; UBC	7316; 7311; 142; 6233; 60	38	38
9.21632e-05	0.000251378	Apoptosis	Reactome	R-HSA-109581	YWHAZ; TP53; VIM; CTNNB1; APC; LMNA; YWHAG; GSN	7157; 7532; 4000; 2934; 324; 1499; 7431; 7534	118	118
9.3519e-05	0.000252242	Downregulation of ERBB4 signaling	Reactome	R-HSA-1253288	UBA52; RPS27A; UBC	7316; 7311; 6233	8	8
9.3519e-05	0.000252242	Ubiquitin Mediated Degradation of Phosphorylated Cdc25A	Reactome	R-HSA-69601	UBA52; RPS27A; UBC	7316; 7311; 6233	8	8
9.3519e-05	0.000252242	p53-Independent DNA Damage Response	Reactome	R-HSA-69610	UBA52; RPS27A; UBC	7316; 7311; 6233	8	8
[truncated: 468 more rows]
